# Supplementary material for: Soluble polymer supported divergent synthesis of tetracyclic benzene-fused pyrazino/diazepino indoles: an advanced synthetic approach to bioactive scaffolds
Source: Royal Society of Chemistry journal article supplement (doi:10.1039/c0ob01126f), 2011-01-01
Supplement: c0ob01126f.pdf [file c0ob01126f.pdf]

## Supporting Information

### Soluble Polymer Supported Divergent Synthesis of Tetracyclic Benzene-Fused Pyrazino/Diazepino Indoles: An Advanced Synthetic Approach to Bioactive Scaffolds

Po-Tsung Lin, Deepak B. Salunke, Li-Hsun Chen and Chung-Ming Sun\*

*Department of Applied Chemistry, National Chiao Tung University, Hsinchu 300-10,  
Taiwan*

*E-mail: [cmsun@mail.nctu.edu.tw](mailto:cmsun@mail.nctu.edu.tw)*

### Contents

|                                                               |               |
|---------------------------------------------------------------|---------------|
| Stepwise <sup>1</sup> H NMR Monitoring on a PEG Support ..... | SI 2 – SI 3   |
| Analytical Data for Compounds <b>2b</b> - <b>2f</b> .....     | SI 4 – SI 6   |
| Analytical Data for Compounds <b>3b</b> - <b>3d</b> .....     | SI 6 – SI 7   |
| Analytical Data for Compounds <b>4b</b> – <b>4k</b> .....     | SI 8 – SI 12  |
| X-ray crystallographic data ( <b>2a</b> ) .....               | SI 13 – SI 21 |
| X-ray crystallographic data ( <b>4k</b> ) .....               | SI 22 – SI 28 |

### Stepwise $^1\text{H}$ NMR Monitoring on a PEG Support

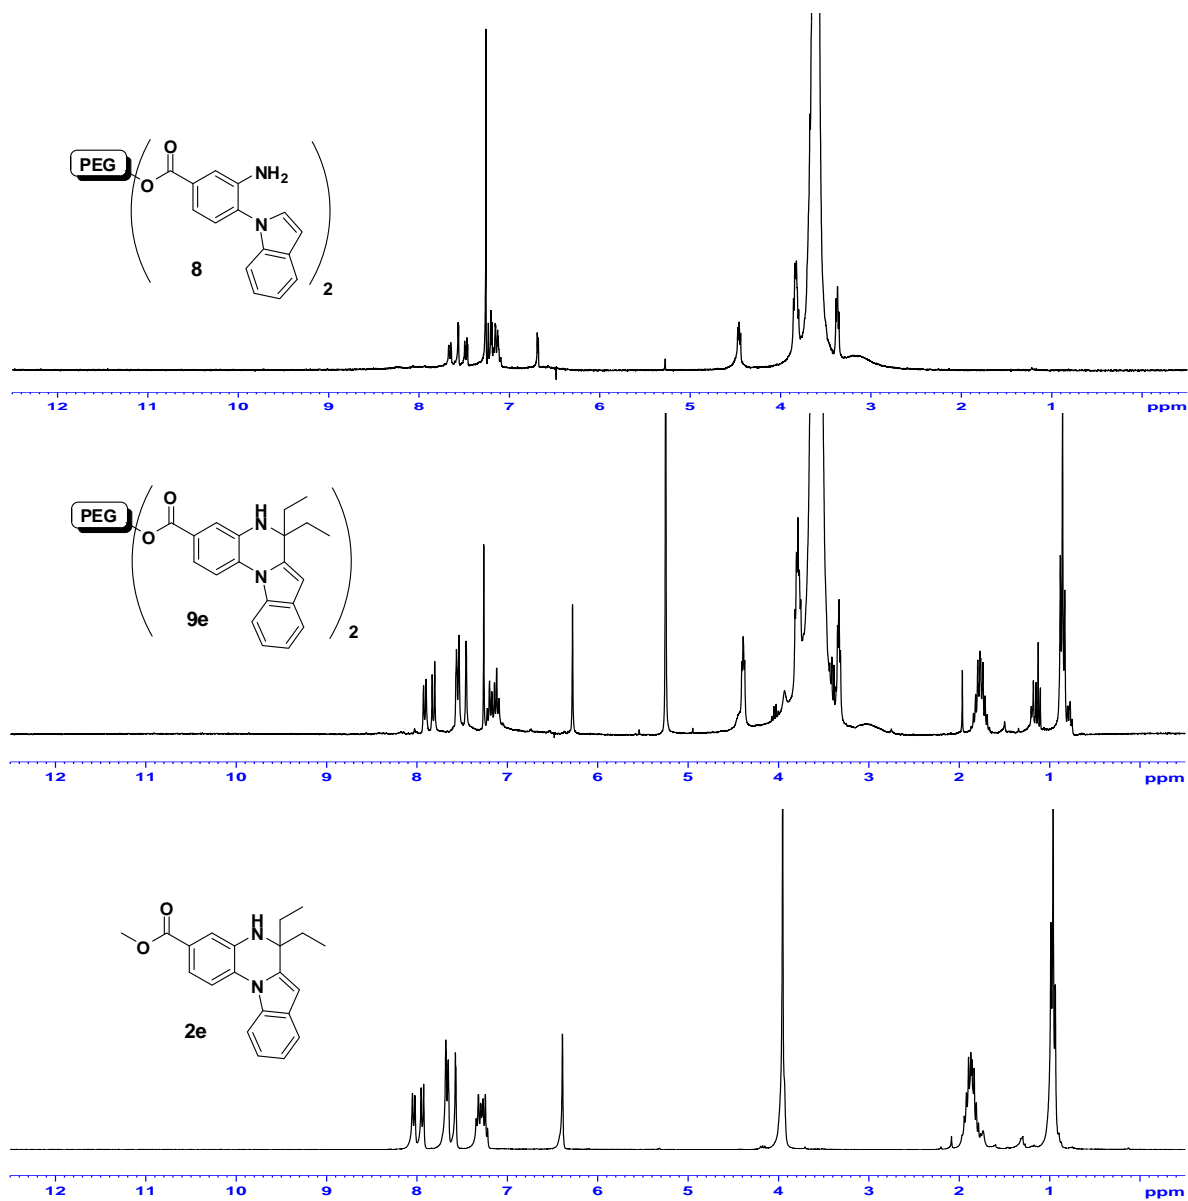

**SI Figure 1.** The stepwise proton NMR monitoring towards the synthesis of **2e** from **8**.

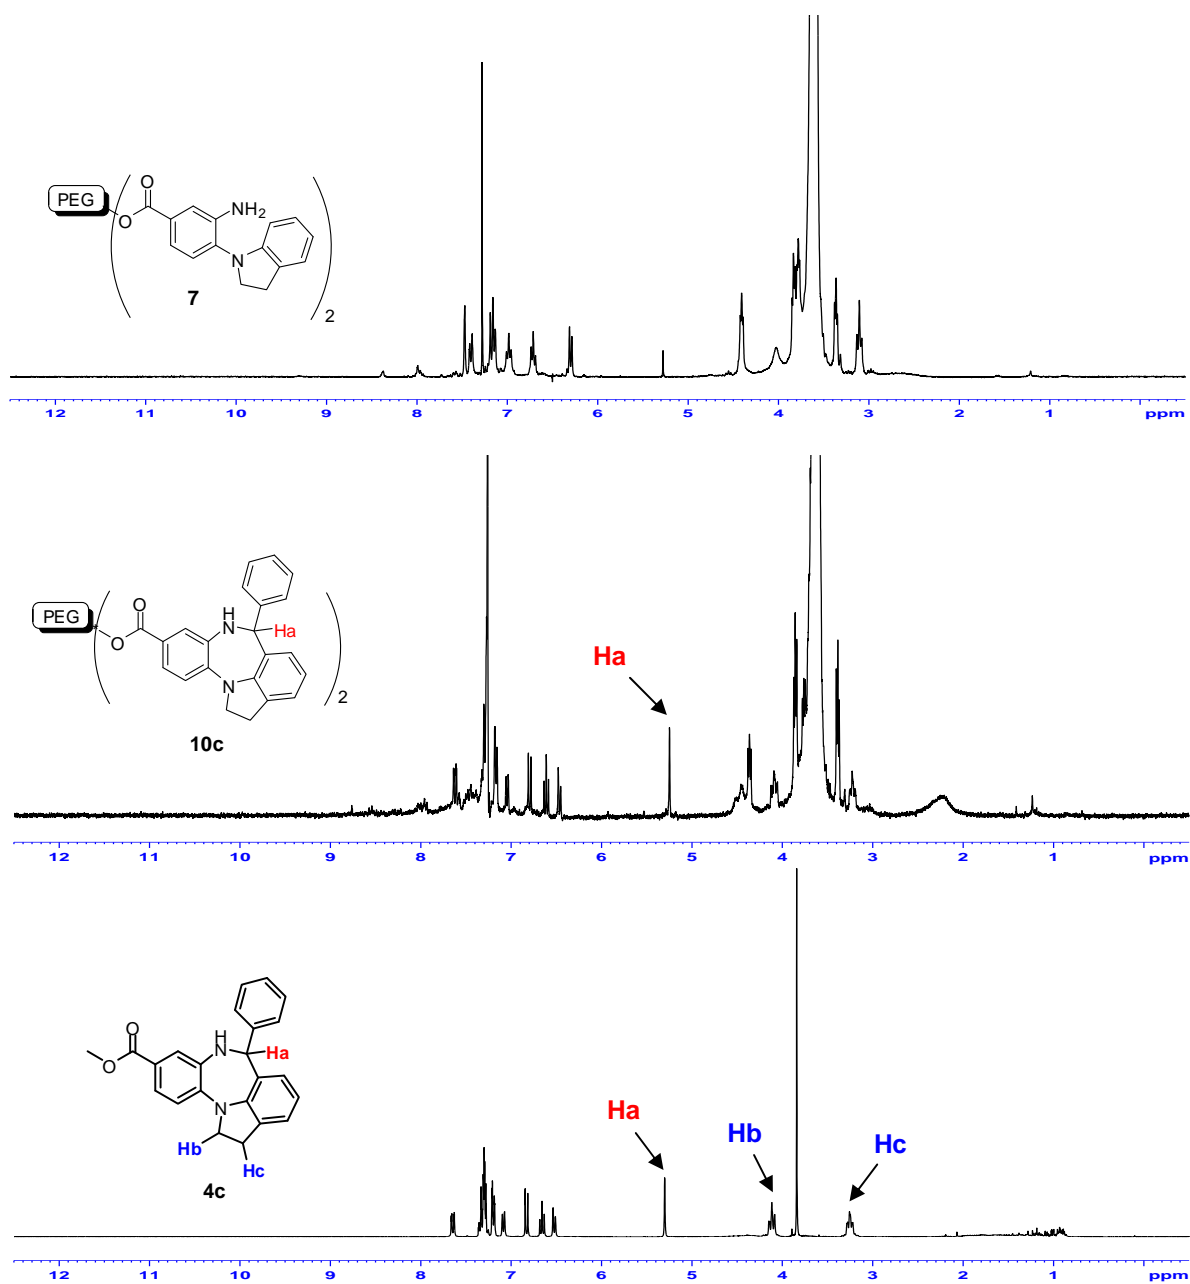

**SI Figure 2.** The stepwise proton NMR monitoring towards the synthesis of **4c** from **7**.

## X-ray crystallographic data (2a)

**SI Table 1.** Crystal data and structure refinement for **2a**.

|                                   |                                                               |                   |
|-----------------------------------|---------------------------------------------------------------|-------------------|
| Empirical formula                 | C <sub>38</sub> H <sub>36</sub> N <sub>4</sub> O <sub>4</sub> |                   |
| Formula weight                    | 612.71                                                        |                   |
| Temperature                       | 100(2) K                                                      |                   |
| Wavelength                        | 0.71073 Å                                                     |                   |
| Crystal system                    | Monoclinic                                                    |                   |
| Space group                       | P 1 c 1                                                       |                   |
| Unit cell dimensions              | a = 10.1275(4) Å                                              | α = 90°           |
|                                   | b = 19.1023(7) Å                                              | β = 106.1820(10)° |
|                                   | c = 8.0831(3) Å                                               | γ = 90°           |
| Volume                            | 1501.79(10) Å <sup>3</sup>                                    |                   |
| Z                                 | 2                                                             |                   |
| Density (calculated)              | 1.355 Mg/m <sup>3</sup>                                       |                   |
| Absorption coefficient            | 0.089 mm <sup>-1</sup>                                        |                   |
| F(000)                            | 648                                                           |                   |
| Crystal size                      | 0.25 x 0.25 x 0.15 mm <sup>3</sup>                            |                   |
| Theta range for data collection   | 2.09 to 26.41°                                                |                   |
| Index ranges                      | -12 ≤ h ≤ 11, -23 ≤ k ≤ 23, -6 ≤ l ≤ 10                       |                   |
| Reflections collected             | 13111                                                         |                   |
| Independent reflections           | 4539 [R(int) = 0.0173]                                        |                   |
| Completeness to theta = 26.41°    | 99.3%                                                         |                   |
| Absorption correction             | Semi-empirical from equivalents                               |                   |
| Max. and min. transmission        | 0.7454 and 0.7180                                             |                   |
| Refinement method                 | Full-matrix least-squares on F <sup>2</sup>                   |                   |
| Data / restraints / parameters    | 4539 / 2 / 421                                                |                   |
| Goodness-of-fit on F <sup>2</sup> | 1.150                                                         |                   |
| Final R indices [I > 2σ(I)]       | R1 = 0.0318, wR2 = 0.0912                                     |                   |
| R indices (all data)              | R1 = 0.0344, wR2 = 0.1044                                     |                   |
| Absolute structure parameter      | -0.2(8)                                                       |                   |
| Largest diff. peak and hole       | 0.431 and -0.467 e.Å <sup>-3</sup>                            |                   |

**SI Table 2.** Atomic coordinates ( $\times 10^4$ ) and equivalent isotropic displacement parameters ( $\text{\AA}^2 \times 10^3$ ) for **2a**.

U(eq) is defined as one third of the trace of the orthogonalized  $U_{ij}$  tensor.

|       | x        | y       | z        | U(eq) |
|-------|----------|---------|----------|-------|
| C(1)  | 3878(2)  | 980(1)  | -2073(3) | 17(1) |
| C(2)  | 2690(2)  | 952(1)  | -1312(3) | 15(1) |
| C(3)  | 1499(2)  | 582(1)  | -1807(3) | 18(1) |
| C(4)  | 697(2)   | 757(1)  | -673(3)  | 18(1) |
| C(5)  | -622(2)  | 567(1)  | -622(3)  | 21(1) |
| C(6)  | -1180(2) | 874(1)  | 574(3)   | 24(1) |
| C(7)  | -435(2)  | 1373(1) | 1726(3)  | 23(1) |
| C(8)  | 879(2)   | 1566(1) | 1724(3)  | 19(1) |
| C(9)  | 1453(2)  | 1253(1) | 530(3)   | 15(1) |
| C(10) | 3815(2)  | 1798(1) | 913(2)   | 15(1) |
| C(11) | 4021(2)  | 2096(1) | 2540(3)  | 17(1) |
| C(12) | 5115(2)  | 2547(1) | 3208(3)  | 18(1) |
| C(13) | 6057(2)  | 2680(1) | 2270(3)  | 16(1) |
| C(14) | 5892(2)  | 2363(1) | 681(3)   | 16(1) |
| C(15) | 4762(2)  | 1936(1) | -39(2)   | 15(1) |
| C(16) | 4933(2)  | 406(1)  | -1298(3) | 23(1) |
| C(17) | 3378(2)  | 900(1)  | -4024(3) | 21(1) |
| C(18) | 7253(2)  | 3151(1) | 2916(3)  | 16(1) |
| C(19) | 8347(2)  | 3962(1) | 5038(3)  | 20(1) |
| C(20) | 1376(2)  | 4075(1) | 11691(2) | 15(1) |
| C(21) | 2566(2)  | 4110(1) | 10919(2) | 15(1) |
| C(22) | 3751(2)  | 4481(1) | 11436(2) | 16(1) |
| C(23) | 4566(2)  | 4296(1) | 10304(3) | 16(1) |
| C(24) | 5870(2)  | 4510(1) | 10229(3) | 19(1) |
| C(25) | 6380(2)  | 4250(1) | 8939(3)  | 18(1) |
| C(26) | 5600(2)  | 3790(1) | 7701(3)  | 18(1) |
| C(27) | 4307(2)  | 3567(1) | 7742(3)  | 17(1) |
| C(28) | 3807(2)  | 3812(1) | 9085(3)  | 14(1) |
| C(29) | 1476(2)  | 3232(1) | 8753(2)  | 14(1) |
| C(30) | 1565(2)  | 2704(1) | 7600(2)  | 16(1) |
| C(31) | 442(2)   | 2284(1) | 6865(3)  | 15(1) |
| C(32) | -776(2)  | 2370(1) | 7322(2)  | 15(1) |

|       |          |         |          |       |
|-------|----------|---------|----------|-------|
| C(33) | -848(2)  | 2879(1) | 8531(3)  | 15(1) |
| C(34) | 253(2)   | 3319(1) | 9237(2)  | 15(1) |
| C(35) | 1713(2)  | 3550(1) | 13186(3) | 23(1) |
| C(36) | 1099(2)  | 4797(1) | 12337(3) | 21(1) |
| C(37) | -1987(2) | 1918(1) | 6609(3)  | 16(1) |
| C(38) | -2892(2) | 1004(1) | 4675(3)  | 23(1) |
| N(1)  | 4505(2)  | 1678(1) | -1709(2) | 17(1) |
| N(2)  | 2702(2)  | 1355(1) | 136(2)   | 15(1) |
| N(3)  | 136(2)   | 3863(1) | 10335(2) | 16(1) |
| N(4)  | 2574(2)  | 3690(1) | 9505(2)  | 14(1) |
| O(1)  | 8171(2)  | 3224(1) | 2243(2)  | 23(1) |
| O(2)  | 7219(1)  | 3495(1) | 4355(2)  | 20(1) |
| O(3)  | -3033(1) | 1929(1) | 7046(2)  | 21(1) |
| O(4)  | -1792(1) | 1487(1) | 5384(2)  | 20(1) |

**SI Table 3.** Bond lengths [Å] for **2a** (Symmetry transformations used to generate equivalent atoms).

|             |          |              |          |              |          |
|-------------|----------|--------------|----------|--------------|----------|
| C(1)-N(1)   | 1.471(2) | C(15)-N(1)   | 1.392(2) | C(27)-C(28)  | 1.400(3) |
| C(1)-C(2)   | 1.497(3) | C(16)-H(16A) | 0.9800   | C(27)-H(27)  | 0.9500   |
| C(1)-C(17)  | 1.523(3) | C(16)-H(16B) | 0.9800   | C(28)-N(4)   | 1.402(2) |
| C(1)-C(16)  | 1.538(3) | C(16)-H(16C) | 0.9800   | C(29)-C(30)  | 1.393(3) |
| C(2)-C(3)   | 1.359(3) | C(17)-H(17A) | 0.9800   | C(29)-C(34)  | 1.409(3) |
| C(2)-N(2)   | 1.398(3) | C(17)-H(17B) | 0.9800   | C(29)-N(4)   | 1.411(2) |
| C(3)-C(4)   | 1.425(3) | C(17)-H(17C) | 0.9800   | C(30)-C(31)  | 1.383(3) |
| C(3)-H(3)   | 0.9500   | C(18)-O(1)   | 1.208(2) | C(30)-H(30)  | 0.9500   |
| C(4)-C(5)   | 1.397(3) | C(18)-O(2)   | 1.345(2) | C(31)-C(32)  | 1.393(3) |
| C(4)-C(9)   | 1.419(3) | C(19)-O(2)   | 1.433(2) | C(31)-H(31)  | 0.9500   |
| C(5)-C(6)   | 1.379(3) | C(19)-H(19A) | 0.9800   | C(32)-C(33)  | 1.395(3) |
| C(5)-H(5)   | 0.9500   | C(19)-H(19B) | 0.9800   | C(32)-C(37)  | 1.479(2) |
| C(6)-C(7)   | 1.398(3) | C(19)-H(19C) | 0.9800   | C(33)-C(34)  | 1.386(3) |
| C(6)-H(6)   | 0.9500   | C(20)-N(3)   | 1.474(2) | C(33)-H(33)  | 0.9500   |
| C(7)-C(8)   | 1.382(3) | C(20)-C(21)  | 1.505(3) | C(34)-N(3)   | 1.394(2) |
| C(7)-H(7)   | 0.9500   | C(20)-C(36)  | 1.528(3) | C(35)-H(35A) | 0.9800   |
| C(8)-C(9)   | 1.393(3) | C(20)-C(35)  | 1.534(3) | C(35)-H(35B) | 0.9800   |
| C(8)-H(8)   | 0.9500   | C(21)-C(22)  | 1.356(3) | C(35)-H(35C) | 0.9800   |
| C(9)-N(2)   | 1.402(2) | C(21)-N(4)   | 1.398(2) | C(36)-H(36A) | 0.9800   |
| C(10)-C(11) | 1.394(3) | C(22)-C(23)  | 1.437(3) | C(36)-H(36B) | 0.9800   |
| C(10)-N(2)  | 1.409(2) | C(22)-H(22)  | 0.9500   | C(36)-H(36C) | 0.9800   |
| C(10)-C(15) | 1.412(3) | C(23)-C(24)  | 1.401(3) | C(37)-O(3)   | 1.207(2) |
| C(11)-C(12) | 1.389(3) | C(23)-C(28)  | 1.412(3) | C(37)-O(4)   | 1.344(2) |
| C(11)-H(11) | 0.9500   | C(24)-C(25)  | 1.378(3) | C(38)-O(4)   | 1.437(2) |
| C(12)-C(13) | 1.397(3) | C(24)-H(24)  | 0.9500   | C(38)-H(38A) | 0.9800   |
| C(12)-H(12) | 0.9500   | C(25)-C(26)  | 1.400(3) | C(38)-H(38B) | 0.9800   |
| C(13)-C(14) | 1.387(3) | C(25)-H(25)  | 0.9500   | C(38)-H(38C) | 0.9800   |
| C(13)-C(18) | 1.483(3) | C(26)-C(27)  | 1.386(3) | N(1)-H(1)    | 0.8800   |
| C(14)-C(15) | 1.394(3) | C(26)-H(26)  | 0.9500   | N(3)-H(3A)   | 0.8800   |
| C(14)-H(14) | 0.9500   |              |          |              |          |

**SI Table 4.** Bond angles [°] for **2a** (Symmetry transformations used to generate equivalent atoms).

|                   |            |                     |            |
|-------------------|------------|---------------------|------------|
| N(1)-C(1)-C(2)    | 107.57(15) | C(12)-C(11)-H(11)   | 119.6      |
| N(1)-C(1)-C(17)   | 107.38(16) | C(10)-C(11)-H(11)   | 119.6      |
| C(2)-C(1)-C(17)   | 110.41(16) | C(11)-C(12)-C(13)   | 119.53(18) |
| N(1)-C(1)-C(16)   | 110.64(16) | C(11)-C(12)-H(12)   | 120.2      |
| C(2)-C(1)-C(16)   | 110.69(15) | C(13)-C(12)-H(12)   | 120.2      |
| C(17)-C(1)-C(16)  | 110.07(16) | C(14)-C(13)-C(12)   | 119.96(17) |
| C(3)-C(2)-N(2)    | 109.47(17) | C(14)-C(13)-C(18)   | 117.79(17) |
| C(3)-C(2)-C(1)    | 130.25(18) | C(12)-C(13)-C(18)   | 122.25(18) |
| N(2)-C(2)-C(1)    | 120.28(16) | C(13)-C(14)-C(15)   | 120.97(18) |
| C(2)-C(3)-C(4)    | 107.83(18) | C(13)-C(14)-H(14)   | 119.5      |
| C(2)-C(3)-H(3)    | 126.1      | C(15)-C(14)-H(14)   | 119.5      |
| C(4)-C(3)-H(3)    | 126.1      | N(1)-C(15)-C(14)    | 121.45(17) |
| C(5)-C(4)-C(9)    | 119.45(19) | N(1)-C(15)-C(10)    | 119.42(16) |
| C(5)-C(4)-C(3)    | 132.82(19) | C(14)-C(15)-C(10)   | 119.01(17) |
| C(9)-C(4)-C(3)    | 107.62(17) | C(1)-C(16)-H(16A)   | 109.5      |
| C(6)-C(5)-C(4)    | 119.46(19) | C(1)-C(16)-H(16B)   | 109.5      |
| C(6)-C(5)-H(5)    | 120.3      | H(16A)-C(16)-H(16B) | 109.5      |
| C(4)-C(5)-H(5)    | 120.3      | C(1)-C(16)-H(16C)   | 109.5      |
| C(5)-C(6)-C(7)    | 120.46(19) | H(16A)-C(16)-H(16C) | 109.5      |
| C(5)-C(6)-H(6)    | 119.8      | H(16B)-C(16)-H(16C) | 109.5      |
| C(7)-C(6)-H(6)    | 119.8      | C(1)-C(17)-H(17A)   | 109.5      |
| C(8)-C(7)-C(6)    | 121.5(2)   | C(1)-C(17)-H(17B)   | 109.5      |
| C(8)-C(7)-H(7)    | 119.3      | H(17A)-C(17)-H(17B) | 109.5      |
| C(6)-C(7)-H(7)    | 119.3      | C(1)-C(17)-H(17C)   | 109.5      |
| C(7)-C(8)-C(9)    | 118.32(19) | H(17A)-C(17)-H(17C) | 109.5      |
| C(7)-C(8)-H(8)    | 120.8      | H(17B)-C(17)-H(17C) | 109.5      |
| C(9)-C(8)-H(8)    | 120.8      | O(1)-C(18)-O(2)     | 122.82(17) |
| C(8)-C(9)-N(2)    | 132.49(18) | O(1)-C(18)-C(13)    | 124.52(18) |
| C(8)-C(9)-C(4)    | 120.79(17) | O(2)-C(18)-C(13)    | 112.66(16) |
| N(2)-C(9)-C(4)    | 106.59(17) | O(2)-C(19)-H(19A)   | 109.5      |
| C(11)-C(10)-N(2)  | 123.79(17) | O(2)-C(19)-H(19B)   | 109.5      |
| C(11)-C(10)-C(15) | 119.52(16) | H(19A)-C(19)-H(19B) | 109.5      |
| N(2)-C(10)-C(15)  | 116.69(17) | O(2)-C(19)-H(19C)   | 109.5      |
| C(12)-C(11)-C(10) | 120.89(18) | H(19A)-C(19)-H(19C) | 109.5      |

Continued...



|                     |            |                     |            |
|---------------------|------------|---------------------|------------|
| H(19B)-C(19)-H(19C) | 109.5      | C(29)-C(30)-H(30)   | 119.7      |
| N(3)-C(20)-C(21)    | 108.56(15) | C(30)-C(31)-C(32)   | 120.03(17) |
| N(3)-C(20)-C(36)    | 107.59(15) | C(30)-C(31)-H(31)   | 120.0      |
| C(21)-C(20)-C(36)   | 110.28(16) | C(32)-C(31)-H(31)   | 120.0      |
| N(3)-C(20)-C(35)    | 111.26(16) | C(31)-C(32)-C(33)   | 119.43(17) |
| C(21)-C(20)-C(35)   | 109.09(16) | C(31)-C(32)-C(37)   | 121.82(17) |
| C(36)-C(20)-C(35)   | 110.02(17) | C(33)-C(32)-C(37)   | 118.71(17) |
| C(22)-C(21)-N(4)    | 110.23(17) | C(34)-C(33)-C(32)   | 121.16(17) |
| C(22)-C(21)-C(20)   | 129.60(17) | C(34)-C(33)-H(33)   | 119.4      |
| N(4)-C(21)-C(20)    | 120.09(16) | C(32)-C(33)-H(33)   | 119.4      |
| C(21)-C(22)-C(23)   | 106.92(16) | C(33)-C(34)-N(3)    | 120.86(17) |
| C(21)-C(22)-H(22)   | 126.5      | C(33)-C(34)-C(29)   | 118.95(16) |
| C(23)-C(22)-H(22)   | 126.5      | N(3)-C(34)-C(29)    | 120.09(16) |
| C(24)-C(23)-C(28)   | 119.87(18) | C(20)-C(35)-H(35A)  | 109.5      |
| C(24)-C(23)-C(22)   | 132.19(18) | C(20)-C(35)-H(35B)  | 109.5      |
| C(28)-C(23)-C(22)   | 107.94(16) | H(35A)-C(35)-H(35B) | 109.5      |
| C(25)-C(24)-C(23)   | 118.95(18) | C(20)-C(35)-H(35C)  | 109.5      |
| C(25)-C(24)-H(24)   | 120.5      | H(35A)-C(35)-H(35C) | 109.5      |
| C(23)-C(24)-H(24)   | 120.5      | H(35B)-C(35)-H(35C) | 109.5      |
| C(24)-C(25)-C(26)   | 120.77(18) | C(20)-C(36)-H(36A)  | 109.5      |
| C(24)-C(25)-H(25)   | 119.6      | C(20)-C(36)-H(36B)  | 109.5      |
| C(26)-C(25)-H(25)   | 119.6      | H(36A)-C(36)-H(36B) | 109.5      |
| C(27)-C(26)-C(25)   | 121.62(19) | C(20)-C(36)-H(36C)  | 109.5      |
| C(27)-C(26)-H(26)   | 119.2      | H(36A)-C(36)-H(36C) | 109.5      |
| C(25)-C(26)-H(26)   | 119.2      | H(36B)-C(36)-H(36C) | 109.5      |
| C(26)-C(27)-C(28)   | 117.71(18) | O(3)-C(37)-O(4)     | 123.25(18) |
| C(26)-C(27)-H(27)   | 121.1      | O(3)-C(37)-C(32)    | 125.11(18) |
| C(28)-C(27)-H(27)   | 121.1      | O(4)-C(37)-C(32)    | 111.64(16) |
| C(27)-C(28)-N(4)    | 132.21(18) | O(4)-C(38)-H(38A)   | 109.5      |
| C(27)-C(28)-C(23)   | 120.99(18) | O(4)-C(38)-H(38B)   | 109.5      |
| N(4)-C(28)-C(23)    | 106.75(16) | H(38A)-C(38)-H(38B) | 109.5      |
| C(30)-C(29)-C(34)   | 119.72(17) | O(4)-C(38)-H(38C)   | 109.5      |
| C(30)-C(29)-N(4)    | 123.15(17) | H(38A)-C(38)-H(38C) | 109.5      |
| C(34)-C(29)-N(4)    | 117.12(16) | H(38B)-C(38)-H(38C) | 109.5      |
| C(31)-C(30)-C(29)   | 120.62(17) | C(15)-N(1)-C(1)     | 117.91(16) |
| C(31)-C(30)-H(30)   | 119.7      | C(15)-N(1)-H(1)     | 121.0      |

Continued...

|                  |            |                  |            |
|------------------|------------|------------------|------------|
| C(1)-N(1)-H(1)   | 121.0      | C(20)-N(3)-H(3A) | 120.9      |
| C(2)-N(2)-C(9)   | 108.44(15) | C(21)-N(4)-C(28) | 108.12(15) |
| C(2)-N(2)-C(10)  | 121.54(16) | C(21)-N(4)-C(29) | 121.61(16) |
| C(9)-N(2)-C(10)  | 129.96(16) | C(28)-N(4)-C(29) | 130.26(16) |
| C(34)-N(3)-C(20) | 118.16(15) | C(18)-O(2)-C(19) | 115.29(15) |
| C(34)-N(3)-H(3A) | 120.9      | C(37)-O(4)-C(38) | 115.47(16) |

**SI Table 5.** Anisotropic displacement parameters ( $\text{\AA}^2 \times 10^3$ ) for **2a**. The anisotropic displacement factor exponent takes the form:  $-2\pi^2[h^2a^*2U^{11}+\dots+2hka^*b^*U^{12}]$ .

|       | U11   | U22   | U33   | U23   | U13   | U12   |
|-------|-------|-------|-------|-------|-------|-------|
| C(1)  | 16(1) | 17(1) | 19(1) | 0(1)  | 6(1)  | 0(1)  |
| C(2)  | 16(1) | 13(1) | 16(1) | 2(1)  | 5(1)  | 3(1)  |
| C(3)  | 18(1) | 18(1) | 18(1) | 0(1)  | 5(1)  | 0(1)  |
| C(4)  | 16(1) | 18(1) | 18(1) | 3(1)  | 4(1)  | -1(1) |
| C(5)  | 16(1) | 24(1) | 22(1) | 2(1)  | 3(1)  | -5(1) |
| C(6)  | 14(1) | 32(1) | 25(1) | 4(1)  | 6(1)  | -5(1) |
| C(7)  | 17(1) | 31(1) | 22(1) | 2(1)  | 8(1)  | 1(1)  |
| C(8)  | 17(1) | 21(1) | 21(1) | 0(1)  | 6(1)  | -2(1) |
| C(9)  | 12(1) | 16(1) | 17(1) | 6(1)  | 3(1)  | 0(1)  |
| C(10) | 12(1) | 14(1) | 18(1) | 3(1)  | 2(1)  | 1(1)  |
| C(11) | 13(1) | 22(1) | 17(1) | 3(1)  | 7(1)  | 0(1)  |
| C(12) | 18(1) | 20(1) | 14(1) | -1(1) | 5(1)  | 1(1)  |
| C(13) | 14(1) | 16(1) | 17(1) | 3(1)  | 4(1)  | 1(1)  |
| C(14) | 14(1) | 17(1) | 18(1) | 2(1)  | 6(1)  | 0(1)  |
| C(15) | 17(1) | 15(1) | 15(1) | 2(1)  | 5(1)  | 3(1)  |
| C(16) | 21(1) | 20(1) | 29(1) | 4(1)  | 10(1) | 4(1)  |
| C(17) | 22(1) | 24(1) | 20(1) | -3(1) | 10(1) | -3(1) |
| C(18) | 15(1) | 16(1) | 17(1) | 4(1)  | 4(1)  | 2(1)  |
| C(19) | 19(1) | 19(1) | 22(1) | -3(1) | 5(1)  | -4(1) |
| C(20) | 15(1) | 19(1) | 11(1) | -2(1) | 3(1)  | 0(1)  |
| C(21) | 17(1) | 14(1) | 13(1) | 0(1)  | 3(1)  | 2(1)  |
| C(22) | 16(1) | 17(1) | 16(1) | -2(1) | 4(1)  | -1(1) |
| C(23) | 15(1) | 15(1) | 16(1) | 2(1)  | 3(1)  | 0(1)  |
| C(24) | 17(1) | 18(1) | 21(1) | 1(1)  | 4(1)  | -2(1) |

|       |       |       |       |       |      |       |
|-------|-------|-------|-------|-------|------|-------|
| C(25) | 13(1) | 19(1) | 21(1) | 3(1)  | 4(1) | -1(1) |
| C(26) | 18(1) | 19(1) | 19(1) | 1(1)  | 9(1) | 1(1)  |
| C(27) | 18(1) | 18(1) | 14(1) | 0(1)  | 3(1) | -1(1) |
| C(28) | 13(1) | 14(1) | 16(1) | 3(1)  | 5(1) | 1(1)  |
| C(29) | 13(1) | 14(1) | 13(1) | 3(1)  | 2(1) | 0(1)  |
| C(30) | 14(1) | 17(1) | 18(1) | 2(1)  | 5(1) | 2(1)  |
| C(31) | 17(1) | 14(1) | 15(1) | 0(1)  | 5(1) | 2(1)  |
| C(32) | 14(1) | 16(1) | 14(1) | 3(1)  | 2(1) | 0(1)  |
| C(33) | 14(1) | 17(1) | 17(1) | 2(1)  | 6(1) | 0(1)  |
| C(34) | 15(1) | 16(1) | 12(1) | 1(1)  | 4(1) | 2(1)  |
| C(35) | 21(1) | 29(1) | 21(1) | 6(1)  | 8(1) | 1(1)  |
| C(36) | 20(1) | 22(1) | 23(1) | -8(1) | 7(1) | 0(1)  |
| C(37) | 16(1) | 17(1) | 16(1) | 2(1)  | 4(1) | 1(1)  |
| C(38) | 19(1) | 20(1) | 29(1) | -6(1) | 4(1) | -6(1) |
| N(1)  | 20(1) | 16(1) | 15(1) | 1(1)  | 8(1) | -3(1) |
| N(2)  | 13(1) | 17(1) | 15(1) | 1(1)  | 5(1) | 0(1)  |
| N(3)  | 13(1) | 18(1) | 16(1) | -5(1) | 4(1) | 1(1)  |
| N(4)  | 14(1) | 15(1) | 14(1) | 0(1)  | 5(1) | 0(1)  |
| O(1)  | 19(1) | 28(1) | 23(1) | -3(1) | 8(1) | -5(1) |
| O(2)  | 16(1) | 23(1) | 20(1) | -5(1) | 6(1) | -5(1) |
| O(3)  | 15(1) | 28(1) | 22(1) | -5(1) | 8(1) | -5(1) |
| O(4)  | 16(1) | 20(1) | 23(1) | -8(1) | 6(1) | -5(1) |

**SI Table 6.** Hydrogen coordinates ( $\times 10^4$ ) and isotropic displacement parameters ( $\text{\AA}^2 \times 10^3$ ) for **2a**.

|        | x     | y    | z     | U(eq) |
|--------|-------|------|-------|-------|
| H(3)   | 1247  | 262  | -2743 | 22    |
| H(5)   | -1132 | 228  | -1405 | 26    |
| H(6)   | -2076 | 745  | 616   | 29    |
| H(7)   | -843  | 1584 | 2529  | 27    |
| H(8)   | 1378  | 1904 | 2518  | 23    |
| H(11)  | 3405  | 1988 | 3200  | 20    |
| H(12)  | 5223  | 2763 | 4296  | 21    |
| H(14)  | 6560  | 2439 | 74    | 19    |
| H(16A) | 5729  | 453  | -1754 | 34    |
| H(16B) | 4510  | -55  | -1603 | 34    |
| H(16C) | 5231  | 455  | -41   | 34    |

|        |       |      |       |    |
|--------|-------|------|-------|----|
| H(17A) | 2689  | 1261 | -4503 | 32 |
| H(17B) | 2967  | 436  | -4312 | 32 |
| H(17C) | 4157  | 953  | -4511 | 32 |
| H(19A) | 9212  | 3700 | 5297  | 30 |
| H(19B) | 8246  | 4178 | 6096  | 30 |
| H(19C) | 8353  | 4327 | 4189  | 30 |
| H(22)  | 3996  | 4802 | 12368 | 20 |
| H(24)  | 6396  | 4830 | 11054 | 22 |
| H(25)  | 7271  | 4385 | 8891  | 21 |
| H(26)  | 5966  | 3626 | 6810  | 21 |
| H(27)  | 3779  | 3259 | 6888  | 20 |
| H(30)  | 2404  | 2632 | 7316  | 19 |
| H(31)  | 502   | 1937 | 6048  | 18 |
| H(33)  | -1667 | 2925 | 8877  | 18 |
| H(35A) | 921   | 3505 | 13650 | 35 |
| H(35B) | 2510  | 3717 | 14094 | 35 |
| H(35C) | 1925  | 3094 | 12770 | 35 |
| H(36A) | 979   | 5139 | 11402 | 32 |
| H(36B) | 1879  | 4936 | 13303 | 32 |
| H(36C) | 263   | 4779 | 12719 | 32 |
| H(38A) | -3027 | 701  | 5592  | 35 |
| H(38B) | -2660 | 717  | 3790  | 35 |
| H(38C) | -3740 | 1265 | 4157  | 35 |
| H(1)   | 4711  | 1925 | -2522 | 20 |
| H(3A)  | -656  | 4075 | 10223 | 19 |

### X-ray crystallographic data (4k)

SI Table 7. Crystal data and structure refinement for 4k.

|                                   |                                                               |                  |
|-----------------------------------|---------------------------------------------------------------|------------------|
| Empirical formula                 | C <sub>23</sub> H <sub>19</sub> N <sub>3</sub> O <sub>4</sub> |                  |
| Formula weight                    | 401.41                                                        |                  |
| Temperature                       | 100(2) K                                                      |                  |
| Wavelength                        | 0.71073 Å                                                     |                  |
| Crystal system                    | Triclinic                                                     |                  |
| Space group                       | P 1                                                           |                  |
| Unit cell dimensions              | a = 6.7967(2) Å                                               | α = 69.5460(10)° |
|                                   | b = 12.1325(3) Å                                              | β = 81.7740(10)° |
|                                   | c = 12.4682(3) Å                                              | γ = 85.6650(10)° |
| Volume                            | 953.04(4) Å <sup>3</sup>                                      |                  |
| Z                                 | 2                                                             |                  |
| Density (calculated)              | 1.399 Mg/m <sup>3</sup>                                       |                  |
| Absorption coefficient            | 0.098 mm <sup>-1</sup>                                        |                  |
| F(000)                            | 420                                                           |                  |
| Crystal size                      | 0.15 x 0.12 x 0.10 mm <sup>3</sup>                            |                  |
| Theta range for data collection   | 1.76 to 26.43°                                                |                  |
| Index ranges                      | -8<=h<=8, -14<=k<=15, -13<=l<=15                              |                  |
| Reflections collected             | 15954                                                         |                  |
| Independent reflections           | 3916 [R(int) = 0.0219]                                        |                  |
| Completeness to theta = 26.43°    | 99.6 %                                                        |                  |
| Absorption correction             | Semi-empirical from equivalents                               |                  |
| Max. and min. transmission        | 0.7454 and 0.7211                                             |                  |
| Refinement method                 | Full-matrix least-squares on F <sup>2</sup>                   |                  |
| Data / restraints / parameters    | 3916 / 0 / 272                                                |                  |
| Goodness-of-fit on F <sup>2</sup> | 1.055                                                         |                  |
| Final R indices [I>2sigma(I)]     | R1 = 0.0440, wR2 = 0.1376                                     |                  |
| R indices (all data)              | R1 = 0.0547, wR2 = 0.1587                                     |                  |
| Largest diff. peak and hole       | 0.503 and -0.622 e.Å <sup>-3</sup>                            |                  |

---

**SI Table 8.** Atomic coordinates ( $\times 10^4$ ) and equivalent isotropic displacement parameters ( $\text{\AA}^2 \times 10^3$ ) for **4k**.  
 $U(\text{eq})$  is defined as one third of the trace of the orthogonalized  $U_{ij}$  tensor.

|       | x        | y        | z        | U(eq)  |
|-------|----------|----------|----------|--------|
| C(1)  | 2217(2)  | 6877(1)  | 2358(1)  | 34(1)  |
| C(2)  | 1895(2)  | 5583(1)  | 2681(1)  | 34(1)  |
| C(3)  | 167(3)   | 5107(2)  | 3393(2)  | 44(1)  |
| C(4)  | -290(3)  | 3938(2)  | 3693(2)  | 52(1)  |
| C(5)  | 988(3)   | 3199(2)  | 3276(2)  | 47(1)  |
| C(6)  | 2728(3)  | 3636(1)  | 2587(1)  | 37(1)  |
| C(7)  | 4332(3)  | 3017(2)  | 2043(2)  | 45(1)  |
| C(8)  | 5965(3)  | 3918(2)  | 1539(2)  | 42(1)  |
| C(9)  | 6097(2)  | 6073(1)  | 1090(1)  | 32(1)  |
| C(10) | 8127(2)  | 6000(2)  | 701(2)   | 39(1)  |
| C(11) | 9219(2)  | 6986(2)  | 83(2)    | 40(1)  |
| C(12) | 8330(2)  | 8101(2)  | -152(1)  | 36(1)  |
| C(13) | 6347(2)  | 8191(1)  | 278(1)   | 34(1)  |
| C(14) | 5203(2)  | 7216(1)  | 882(1)   | 31(1)  |
| C(15) | 3191(2)  | 4822(1)  | 2286(1)  | 33(1)  |
| C(16) | 3264(2)  | 7179(1)  | 3217(1)  | 34(1)  |
| C(17) | 4826(3)  | 6496(2)  | 3748(2)  | 43(1)  |
| C(18) | 5744(3)  | 6802(2)  | 4524(2)  | 49(1)  |
| C(19) | 5109(3)  | 7788(2)  | 4801(2)  | 46(1)  |
| C(20) | 3562(3)  | 8451(2)  | 4273(2)  | 42(1)  |
| C(21) | 2645(3)  | 8180(1)  | 3481(1)  | 39(1)  |
| C(22) | 9400(3)  | 9190(2)  | -849(1)  | 38(1)  |
| C(23) | 12409(3) | 9970(2)  | -1962(2) | 56(1)  |
| N(1)  | 3160(2)  | 7389(1)  | 1162(1)  | 34(1)  |
| N(2)  | 5042(2)  | 5044(1)  | 1598(1)  | 36(1)  |
| N(3)  | 2809(3)  | 9476(2)  | 4586(2)  | 64(1)  |
| O(1)  | 3048(3)  | 9488(2)  | 5531(2)  | 90(1)  |
| O(2)  | 2003(4)  | 10267(2) | 3886(2)  | 112(1) |
| O(3)  | 8687(2)  | 10171(1) | -1034(1) | 51(1)  |
| O(4)  | 11255(2) | 8968(1)  | -1257(1) | 50(1)  |

**SI Table 9.** Bond lengths [ $\text{\AA}$ ] for **4k** (Symmetry transformations used to generate equivalent atoms).

|             |          |              |          |
|-------------|----------|--------------|----------|
| C(1)-N(1)   | 1.470(2) | C(12)-C(13)  | 1.388(2) |
| C(1)-C(2)   | 1.503(2) | C(12)-C(22)  | 1.480(2) |
| C(1)-C(16)  | 1.523(2) | C(13)-C(14)  | 1.386(2) |
| C(1)-H(1)   | 1.0000   | C(13)-H(13)  | 0.9500   |
| C(2)-C(15)  | 1.393(2) | C(14)-N(1)   | 1.400(2) |
| C(2)-C(3)   | 1.395(2) | C(15)-N(2)   | 1.404(2) |
| C(3)-C(4)   | 1.382(3) | C(16)-C(21)  | 1.388(2) |
| C(3)-H(3)   | 0.9500   | C(16)-C(17)  | 1.391(2) |
| C(4)-C(5)   | 1.381(3) | C(17)-C(18)  | 1.387(2) |
| C(4)-H(4)   | 0.9500   | C(17)-H(17)  | 0.9500   |
| C(5)-C(6)   | 1.379(3) | C(18)-C(19)  | 1.380(3) |
| C(5)-H(5)   | 0.9500   | C(18)-H(18)  | 0.9500   |
| C(6)-C(15)  | 1.403(2) | C(19)-C(20)  | 1.374(3) |
| C(6)-C(7)   | 1.494(2) | C(19)-H(19)  | 0.9500   |
| C(7)-C(8)   | 1.525(3) | C(20)-C(21)  | 1.380(2) |
| C(7)-H(7A)  | 0.9900   | C(20)-N(3)   | 1.464(2) |
| C(7)-H(7B)  | 0.9900   | C(21)-H(21)  | 0.9500   |
| C(8)-N(2)   | 1.481(2) | C(22)-O(3)   | 1.208(2) |
| C(8)-H(8A)  | 0.9900   | C(22)-O(4)   | 1.334(2) |
| C(8)-H(8B)  | 0.9900   | C(23)-O(4)   | 1.437(2) |
| C(9)-N(2)   | 1.389(2) | C(23)-H(23A) | 0.9800   |
| C(9)-C(10)  | 1.402(2) | C(23)-H(23B) | 0.9800   |
| C(9)-C(14)  | 1.423(2) | C(23)-H(23C) | 0.9800   |
| C(10)-C(11) | 1.380(2) | N(1)-H(1A)   | 0.8800   |
| C(10)-H(10) | 0.9500   | N(3)-O(2)    | 1.207(3) |
| C(11)-C(12) | 1.389(2) | N(3)-O(1)    | 1.216(3) |
| C(11)-H(11) | 0.9500   |              |          |

**SI Table 10.** Bond angles [°] for **4k** (Symmetry transformations used to generate equivalent atoms).

|                  |            |                   |            |
|------------------|------------|-------------------|------------|
| N(1)-C(1)-C(2)   | 111.64(12) | N(2)-C(9)-C(14)   | 123.34(14) |
| N(1)-C(1)-C(16)  | 112.97(13) | C(10)-C(9)-C(14)  | 117.59(14) |
| C(2)-C(1)-C(16)  | 113.63(13) | C(11)-C(10)-C(9)  | 122.10(15) |
| N(1)-C(1)-H(1)   | 106.0      | C(11)-C(10)-H(10) | 119.0      |
| C(2)-C(1)-H(1)   | 106.0      | C(9)-C(10)-H(10)  | 119.0      |
| C(16)-C(1)-H(1)  | 106.0      | C(10)-C(11)-C(12) | 120.26(15) |
| C(15)-C(2)-C(3)  | 117.20(16) | C(10)-C(11)-H(11) | 119.9      |
| C(15)-C(2)-C(1)  | 124.10(14) | C(12)-C(11)-H(11) | 119.9      |
| C(3)-C(2)-C(1)   | 118.67(15) | C(13)-C(12)-C(11) | 118.31(15) |
| C(4)-C(3)-C(2)   | 122.51(18) | C(13)-C(12)-C(22) | 118.89(15) |
| C(4)-C(3)-H(3)   | 118.7      | C(11)-C(12)-C(22) | 122.80(15) |
| C(2)-C(3)-H(3)   | 118.7      | C(14)-C(13)-C(12) | 122.72(15) |
| C(5)-C(4)-C(3)   | 119.72(17) | C(14)-C(13)-H(13) | 118.6      |
| C(5)-C(4)-H(4)   | 120.1      | C(12)-C(13)-H(13) | 118.6      |
| C(3)-C(4)-H(4)   | 120.1      | C(13)-C(14)-N(1)  | 118.61(14) |
| C(6)-C(5)-C(4)   | 119.27(17) | C(13)-C(14)-C(9)  | 118.91(14) |
| C(6)-C(5)-H(5)   | 120.4      | N(1)-C(14)-C(9)   | 122.14(14) |
| C(4)-C(5)-H(5)   | 120.4      | C(2)-C(15)-C(6)   | 120.36(15) |
| C(5)-C(6)-C(15)  | 120.91(16) | C(2)-C(15)-N(2)   | 129.59(14) |
| C(5)-C(6)-C(7)   | 129.20(16) | C(6)-C(15)-N(2)   | 110.05(14) |
| C(15)-C(6)-C(7)  | 109.88(15) | C(21)-C(16)-C(17) | 118.28(15) |
| C(6)-C(7)-C(8)   | 103.81(14) | C(21)-C(16)-C(1)  | 118.82(14) |
| C(6)-C(7)-H(7A)  | 111.0      | C(17)-C(16)-C(1)  | 122.90(14) |
| C(8)-C(7)-H(7A)  | 111.0      | C(18)-C(17)-C(16) | 121.18(17) |
| C(6)-C(7)-H(7B)  | 111.0      | C(18)-C(17)-H(17) | 119.4      |
| C(8)-C(7)-H(7B)  | 111.0      | C(16)-C(17)-H(17) | 119.4      |
| H(7A)-C(7)-H(7B) | 109.0      | C(19)-C(18)-C(17) | 120.56(17) |
| N(2)-C(8)-C(7)   | 105.64(14) | C(19)-C(18)-H(18) | 119.7      |
| N(2)-C(8)-H(8A)  | 110.6      | C(17)-C(18)-H(18) | 119.7      |
| C(7)-C(8)-H(8A)  | 110.6      | C(20)-C(19)-C(18) | 117.65(16) |
| N(2)-C(8)-H(8B)  | 110.6      | C(20)-C(19)-H(19) | 121.2      |
| C(7)-C(8)-H(8B)  | 110.6      | C(18)-C(19)-H(19) | 121.2      |
| H(8A)-C(8)-H(8B) | 108.7      | C(19)-C(20)-C(21) | 123.03(16) |
| N(2)-C(9)-C(10)  | 118.98(14) | C(19)-C(20)-N(3)  | 118.68(17) |

Continued...



SI: Part - A

|                     |            |                     |            |
|---------------------|------------|---------------------|------------|
| C(21)-C(20)-N(3)    | 118.27(17) | H(23B)-C(23)-H(23C) | 109.5      |
| C(20)-C(21)-C(16)   | 119.28(16) | C(14)-N(1)-C(1)     | 120.35(12) |
| C(20)-C(21)-H(21)   | 120.4      | C(14)-N(1)-H(1A)    | 119.8      |
| C(16)-C(21)-H(21)   | 120.4      | C(1)-N(1)-H(1A)     | 119.8      |
| O(3)-C(22)-O(4)     | 123.36(16) | C(9)-N(2)-C(15)     | 130.98(13) |
| O(3)-C(22)-C(12)    | 124.24(16) | C(9)-N(2)-C(8)      | 119.68(13) |
| O(4)-C(22)-C(12)    | 112.39(14) | C(15)-N(2)-C(8)     | 109.11(13) |
| O(4)-C(23)-H(23A)   | 109.5      | O(2)-N(3)-O(1)      | 123.7(2)   |
| O(4)-C(23)-H(23B)   | 109.5      | O(2)-N(3)-C(20)     | 117.98(19) |
| H(23A)-C(23)-H(23B) | 109.5      | O(1)-N(3)-C(20)     | 118.3(2)   |
| O(4)-C(23)-H(23C)   | 109.5      | C(22)-O(4)-C(23)    | 116.67(15) |
| H(23A)-C(23)-H(23C) | 109.5      |                     |            |

**Table 11.** Anisotropic displacement parameters ( $\text{\AA}^2 \times 10^3$ ) for **4k**. The anisotropic displacement factor exponent takes the form:  $-2\pi^2[h^2a^2U^{11} + \dots + 2hka^*b^*U^{12}]$ .

|       | U <sub>11</sub> | U <sub>22</sub> | U <sub>33</sub> | U <sub>23</sub> | U <sub>13</sub> | U <sub>12</sub> |
|-------|-----------------|-----------------|-----------------|-----------------|-----------------|-----------------|
| C(1)  | 31(1)           | 36(1)           | 35(1)           | -16(1)          | -4(1)           | 5(1)            |
| C(2)  | 34(1)           | 36(1)           | 34(1)           | -14(1)          | -6(1)           | 1(1)            |
| C(3)  | 38(1)           | 48(1)           | 46(1)           | -17(1)          | 1(1)            | 0(1)            |
| C(4)  | 44(1)           | 50(1)           | 54(1)           | -11(1)          | 4(1)            | -9(1)           |
| C(5)  | 52(1)           | 38(1)           | 50(1)           | -11(1)          | -6(1)           | -10(1)          |
| C(6)  | 47(1)           | 34(1)           | 34(1)           | -12(1)          | -9(1)           | -2(1)           |
| C(7)  | 62(1)           | 34(1)           | 41(1)           | -18(1)          | -3(1)           | -3(1)           |
| C(8)  | 47(1)           | 34(1)           | 49(1)           | -20(1)          | -5(1)           | 7(1)            |
| C(9)  | 34(1)           | 33(1)           | 31(1)           | -14(1)          | -5(1)           | 2(1)            |
| C(10) | 37(1)           | 33(1)           | 48(1)           | -16(1)          | -4(1)           | 6(1)            |
| C(11) | 33(1)           | 42(1)           | 47(1)           | -18(1)          | -2(1)           | 2(1)            |
| C(12) | 37(1)           | 37(1)           | 35(1)           | -15(1)          | -6(1)           | 0(1)            |
| C(13) | 40(1)           | 31(1)           | 34(1)           | -15(1)          | -8(1)           | 5(1)            |
| C(14) | 33(1)           | 34(1)           | 28(1)           | -14(1)          | -6(1)           | 4(1)            |
| C(15) | 36(1)           | 35(1)           | 28(1)           | -12(1)          | -7(1)           | -1(1)           |
| C(16) | 36(1)           | 33(1)           | 31(1)           | -12(1)          | 0(1)            | 0(1)            |
| C(17) | 44(1)           | 46(1)           | 45(1)           | -23(1)          | -10(1)          | 11(1)           |
| C(18) | 47(1)           | 60(1)           | 47(1)           | -25(1)          | -14(1)          | 9(1)            |
| C(19) | 51(1)           | 52(1)           | 41(1)           | -22(1)          | -6(1)           | -7(1)           |
| C(20) | 55(1)           | 33(1)           | 42(1)           | -17(1)          | 0(1)            | -6(1)           |
| C(21) | 46(1)           | 30(1)           | 39(1)           | -11(1)          | -5(1)           | 3(1)            |
| C(22) | 42(1)           | 38(1)           | 34(1)           | -14(1)          | -7(1)           | -2(1)           |
| C(23) | 56(1)           | 53(1)           | 54(1)           | -16(1)          | 10(1)           | -16(1)          |
| N(1)  | 32(1)           | 38(1)           | 32(1)           | -10(1)          | -8(1)           | 8(1)            |
| N(2)  | 39(1)           | 30(1)           | 40(1)           | -16(1)          | 0(1)            | 3(1)            |
| N(3)  | 80(1)           | 47(1)           | 77(1)           | -38(1)          | -9(1)           | 0(1)            |
| O(1)  | 108(2)          | 102(2)          | 97(1)           | -79(1)          | -15(1)          | 7(1)            |
| O(2)  | 178(2)          | 53(1)           | 126(2)          | -49(1)          | -57(2)          | 42(1)           |
| O(3)  | 56(1)           | 35(1)           | 55(1)           | -10(1)          | -4(1)           | 0(1)            |
| O(4)  | 45(1)           | 43(1)           | 54(1)           | -14(1)          | 7(1)            | -6(1)           |

**SI Table 12.** Hydrogen coordinates ( $\times 10^4$ ) and isotropic displacement parameters ( $\text{\AA}^2 \times 10^3$ ) for **4k**.

|        | x     | y     | z     | U(eq) |
|--------|-------|-------|-------|-------|
| H(1)   | 861   | 7256  | 2381  | 40    |
| H(3)   | -731  | 5606  | 3683  | 53    |
| H(4)   | -1478 | 3645  | 4183  | 62    |
| H(5)   | 673   | 2399  | 3463  | 57    |
| H(7A)  | 3854  | 2802  | 1431  | 53    |
| H(7B)  | 4814  | 2296  | 2625  | 53    |
| H(8A)  | 7103  | 3685  | 1995  | 51    |
| H(8B)  | 6445  | 3990  | 730   | 51    |
| H(10)  | 8771  | 5246  | 869   | 47    |
| H(11)  | 10584 | 6903  | -183  | 48    |
| H(13)  | 5750  | 8952  | 152   | 41    |
| H(17)  | 5271  | 5808  | 3576  | 51    |
| H(18)  | 6821  | 6329  | 4868  | 59    |
| H(19)  | 5720  | 8000  | 5338  | 55    |
| H(21)  | 1601  | 8674  | 3121  | 47    |
| H(23A) | 11914 | 10313 | -2713 | 84    |
| H(23B) | 13807 | 9722  | -2073 | 84    |
| H(23C) | 12295 | 10559 | -1580 | 84    |
| H(1A)  | 2438  | 7807  | 618   | 41    |

## Supporting Information

### Soluble Polymer Supported Divergent Synthesis of Tetracyclic Benzene-Fused Pyrazino/Diazepino Indoles: An Advanced Synthetic Approach to Bioactive Scaffolds

Po-Tsung Lin, Deepak B. Salunke, Li-Hsun Chen and Chung-Ming Sun\*

*Department of Applied Chemistry, National Chiao Tung University, Hsinchu, 300-10, Taiwan*

*E-mail: [cmsun@mail.nctu.edu.tw](mailto:cmsun@mail.nctu.edu.tw)*

## Contents

|                                                                                                 |                 |
|-------------------------------------------------------------------------------------------------|-----------------|
| $^1\text{H}$ NMR, $^{13}\text{C}$ NMR, LRMS, HRMS and IR Spectra of <b>2a</b> – <b>2f</b> ..... | SI 3 – SI 32    |
| $^1\text{H}$ NMR, $^{13}\text{C}$ NMR, LRMS, HRMS and IR Spectra of <b>3a</b> – <b>3d</b> ..... | SI 33 – SI 52   |
| $^1\text{H}$ NMR, $^{13}\text{C}$ NMR, LRMS, HRMS and IR Spectra of <b>4a</b> – <b>4k</b> ..... | SI 53 – SI 107  |
| $^1\text{H}$ NMR, $^{13}\text{C}$ NMR, LRMS, HRMS and IR Spectra of <b>5</b> .....              | SI 108 – SI 112 |

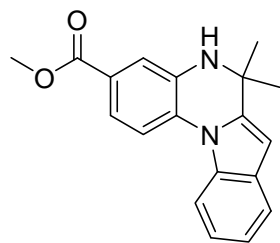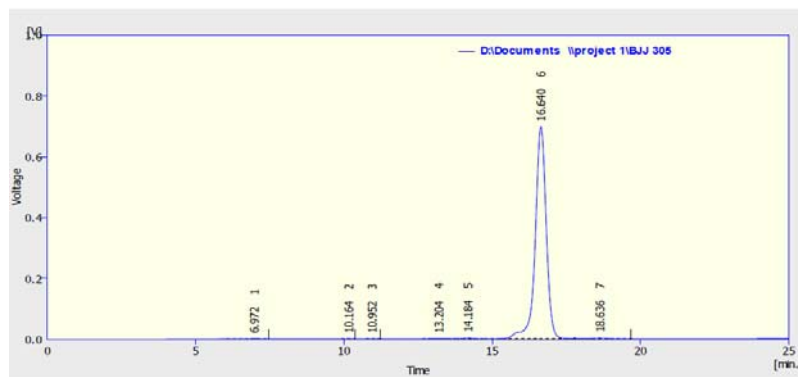

|   | Reten. Time [min] | Area [mV.s] | Height [mV] | Area [%] | Height [%] | W05 [min] |
|---|-------------------|-------------|-------------|----------|------------|-----------|
| 1 | 6.972             | 23.634      | 0.843       | 0.1      | 0.1        | 0.38      |
| 2 | 10.164            | 3.691       | 0.274       | 0.0      | 0.0        | 0.23      |
| 3 | 10.952            | 2.872       | 0.215       | 0.0      | 0.0        | 0.23      |
| 4 | 13.204            | 38.757      | 1.055       | 0.2      | 0.1        | 0.66      |
| 5 | 14.184            | 64.531      | 2.881       | 0.4      | 0.4        | 0.32      |
| 6 | 16.640            | 18072.867   | 697.657     | 98.7     | 98.9       | 0.38      |
| 7 | 18.636            | 107.490     | 2.582       | 0.6      | 0.4        | 0.47      |
|   | Total             | 18313.842   | 705.507     | 100.0    | 100.0      |           |

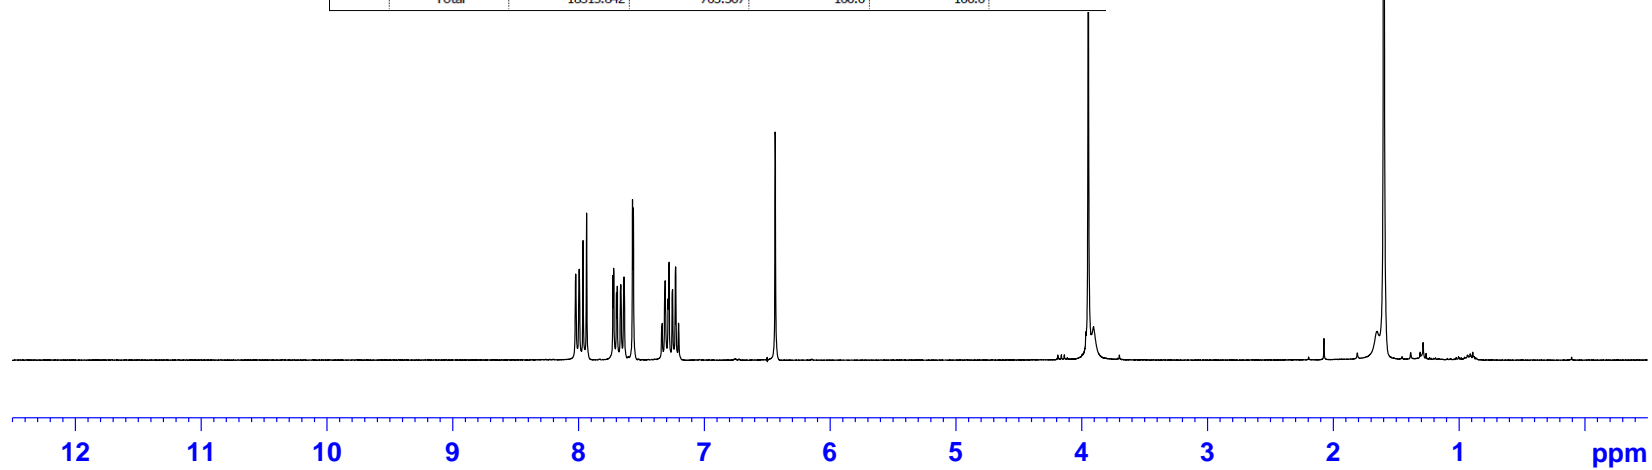

HPLC and <sup>1</sup>H NMR Spectrum (300 MHz) of compound **2a** in CDCl<sub>3</sub>

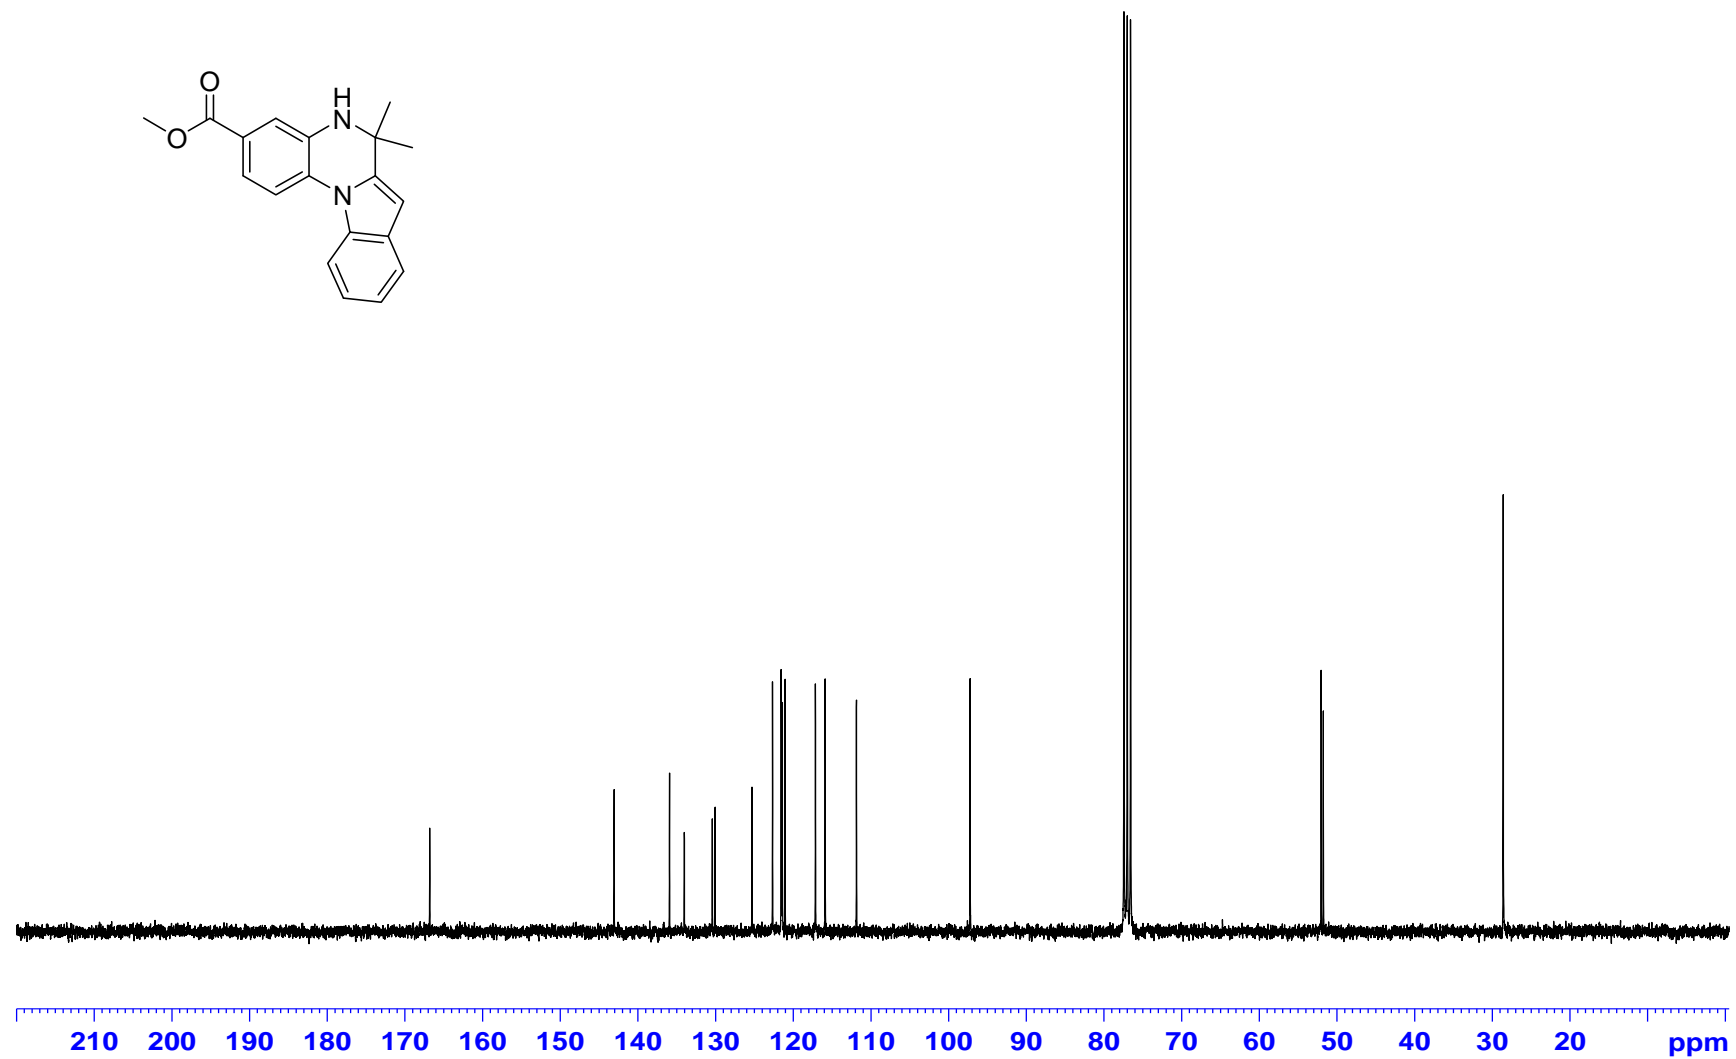

<sup>13</sup>C NMR Spectrum (75 MHz) of compound **2a** in CDCl<sub>3</sub>

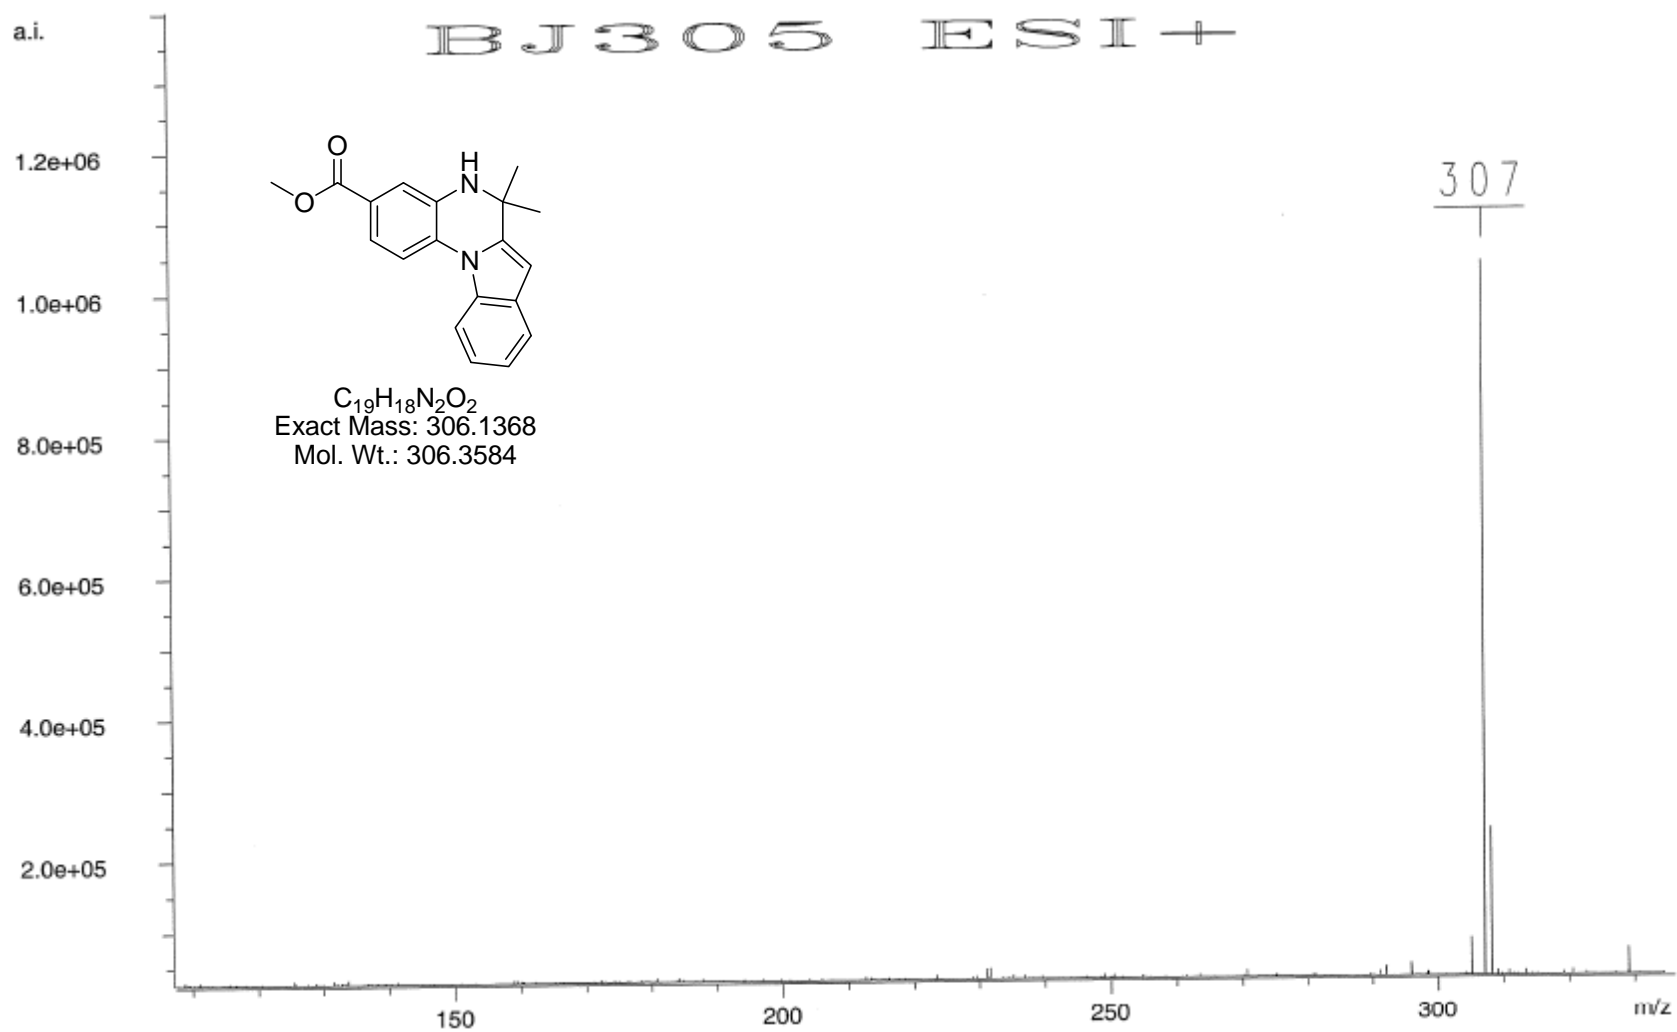

Low Resolution Mass Spectrum (LRMS) of compound **2a**



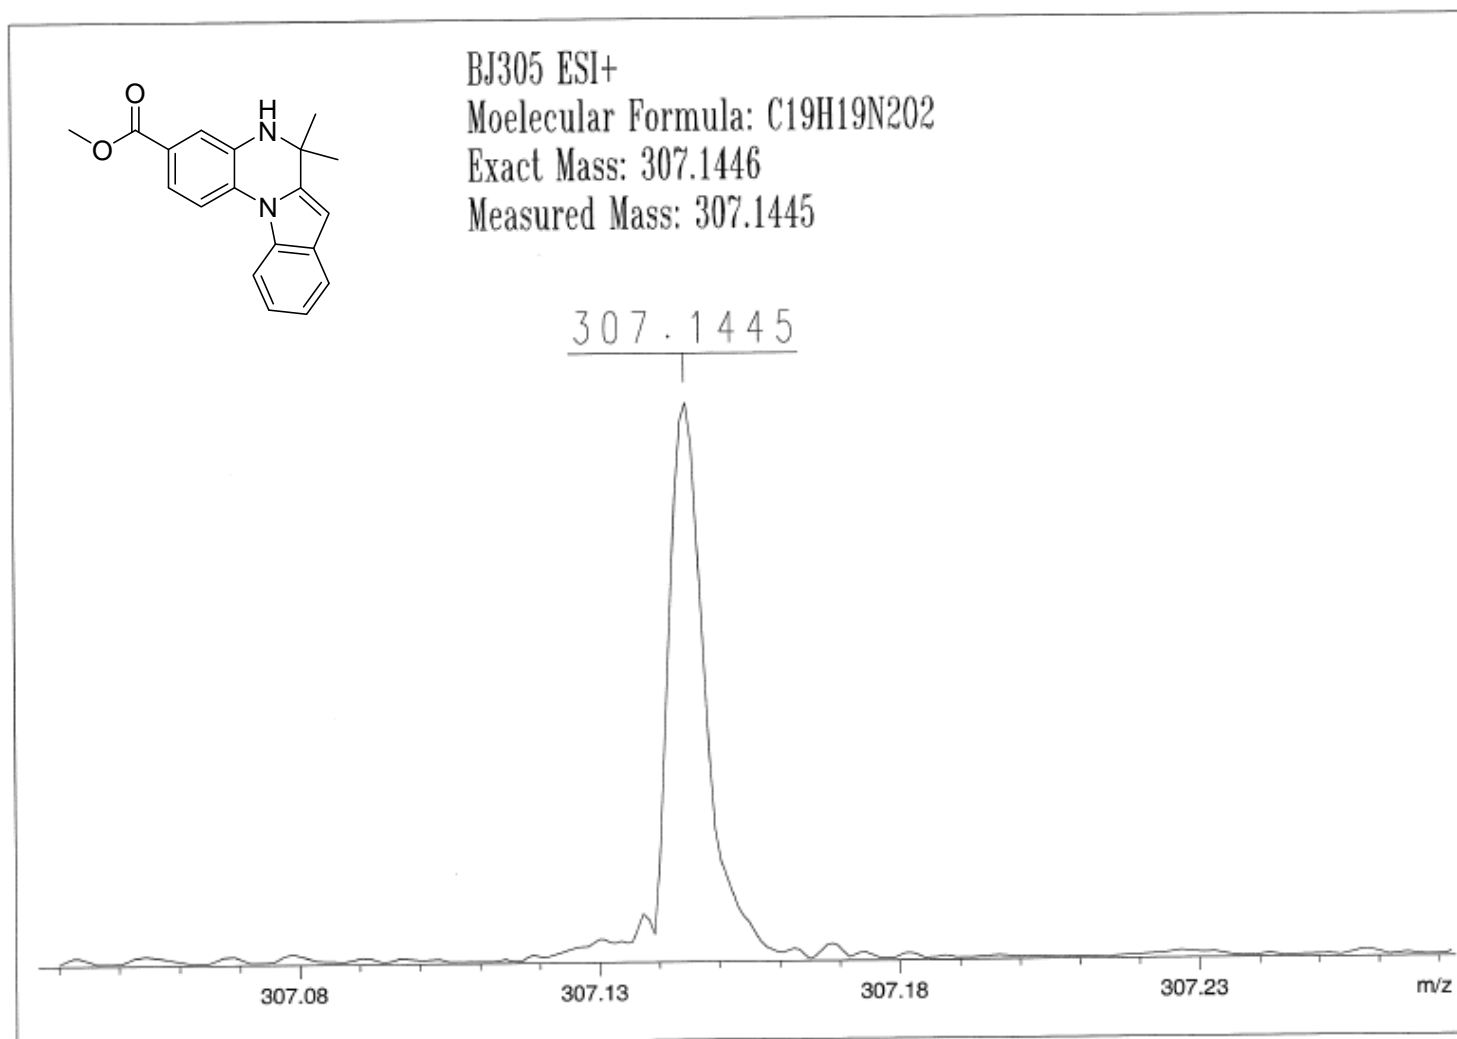

High Resolution Mass Spectrum (HRMS) of compound **2a**

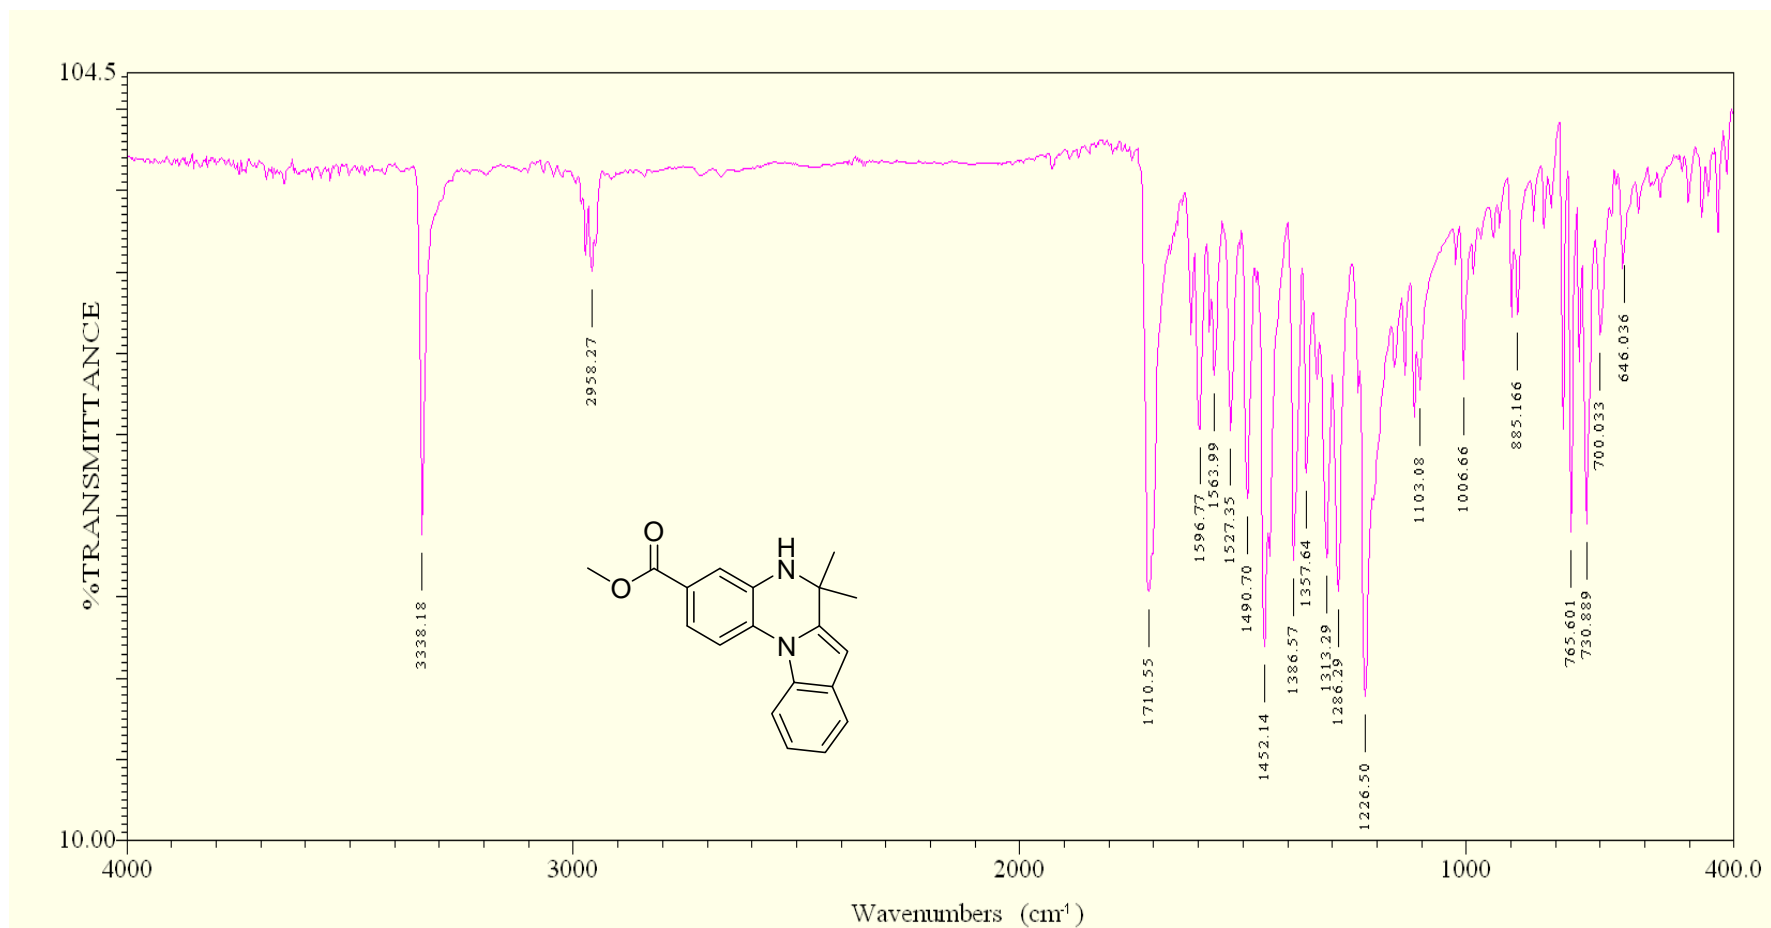

IR Spectrum of compound **2a** (Neat)

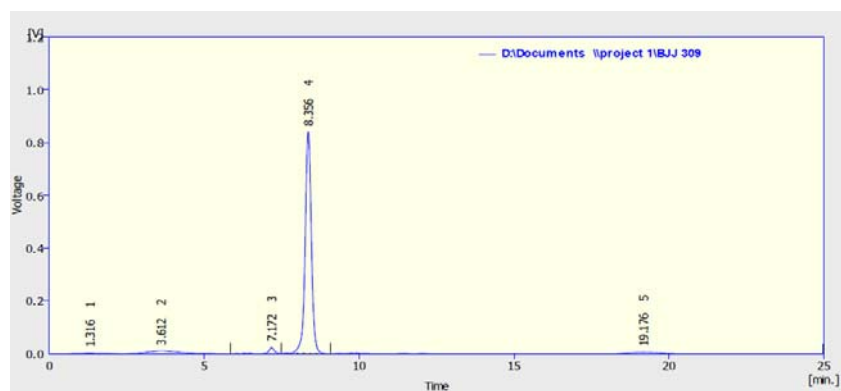

|   | Reten. Time [min] | Area [mV.s] | Height [mV] | Area [%] | Height [%] | W05 [min] |
|---|-------------------|-------------|-------------|----------|------------|-----------|
| 1 | 1.316             | 134.411     | 1.887       | 1.0      | 0.2        | 1.15      |
| 2 | 3.612             | 732.502     | 10.066      | 5.5      | 1.1        | 1.05      |
| 3 | 7.172             | 262.953     | 23.121      | 2.0      | 2.6        | 0.16      |
| 4 | 8.356             | 11673.605   | 841.154     | 87.1     | 95.4       | 0.21      |
| 5 | 19.176            | 599.342     | 5.848       | 4.5      | 0.7        | 1.32      |
|   | Total             | 13402.814   | 882.076     | 100.0    | 100.0      |           |

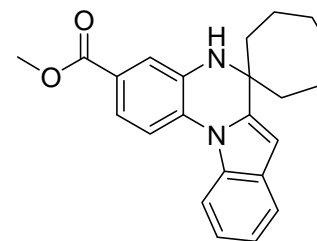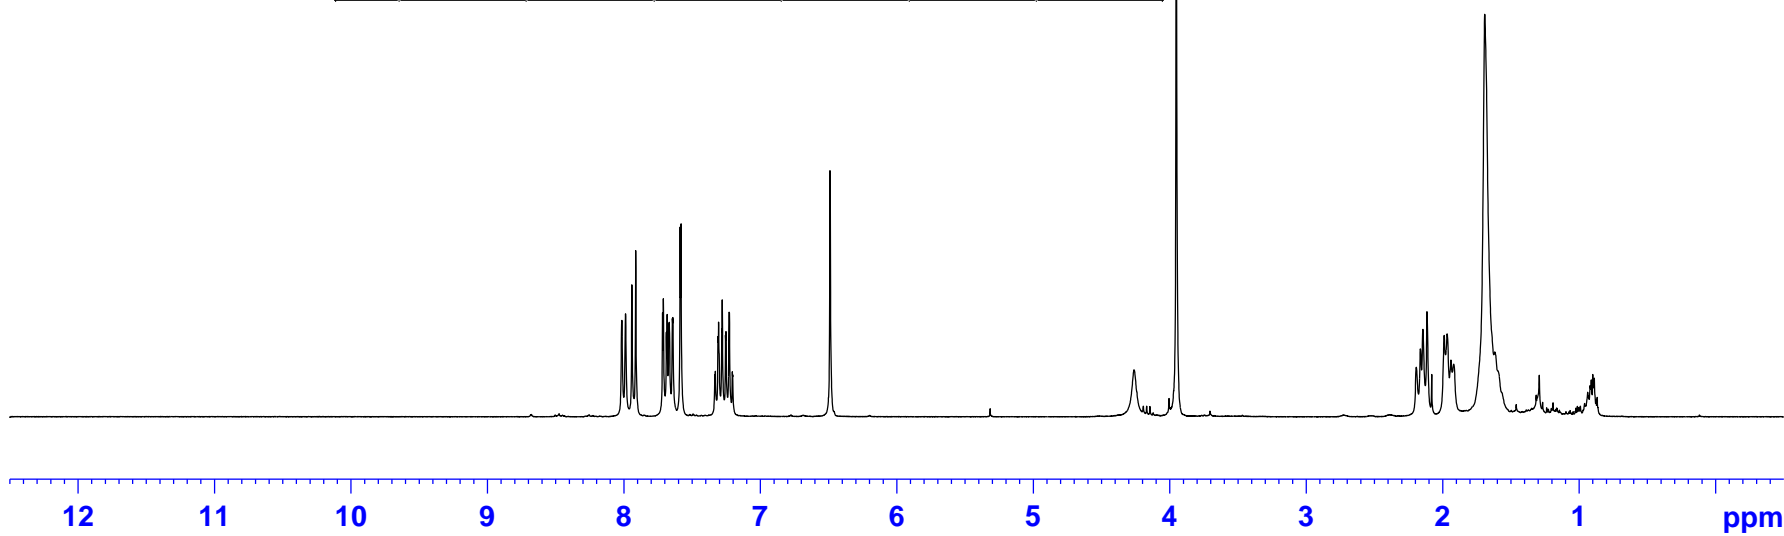

HPLC and  $^1\text{H}$  NMR Spectrum (300 MHz) of compound **2b** in  $\text{CDCl}_3$

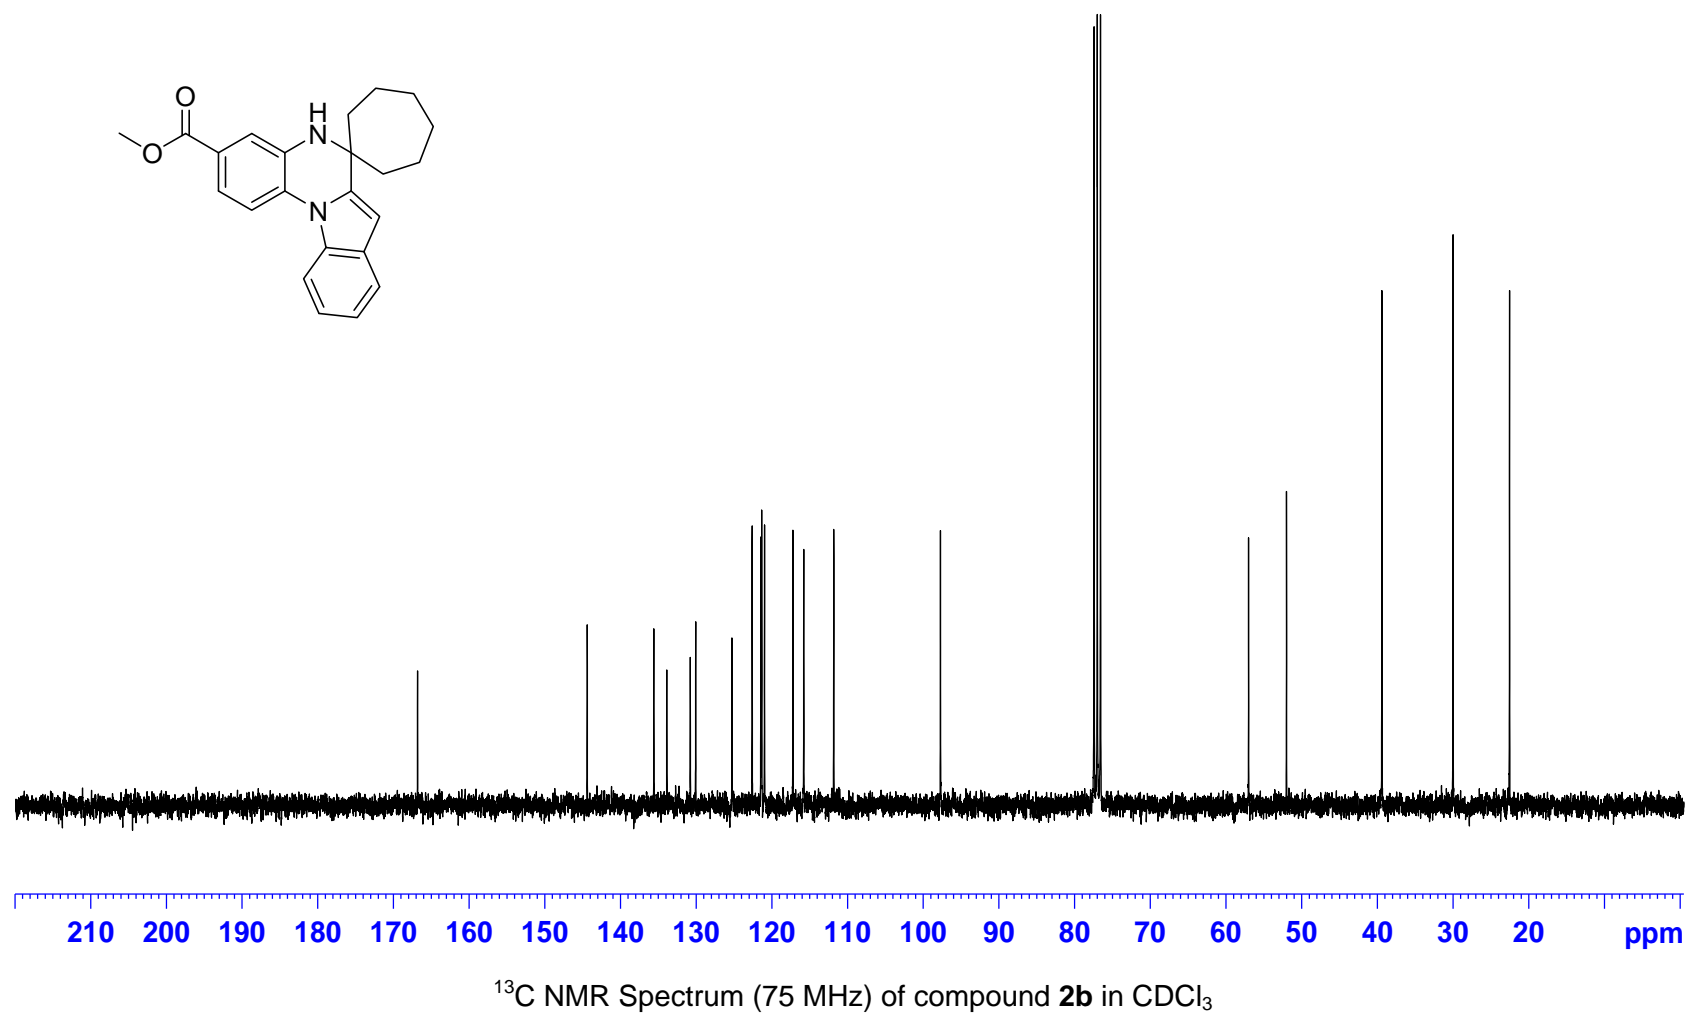

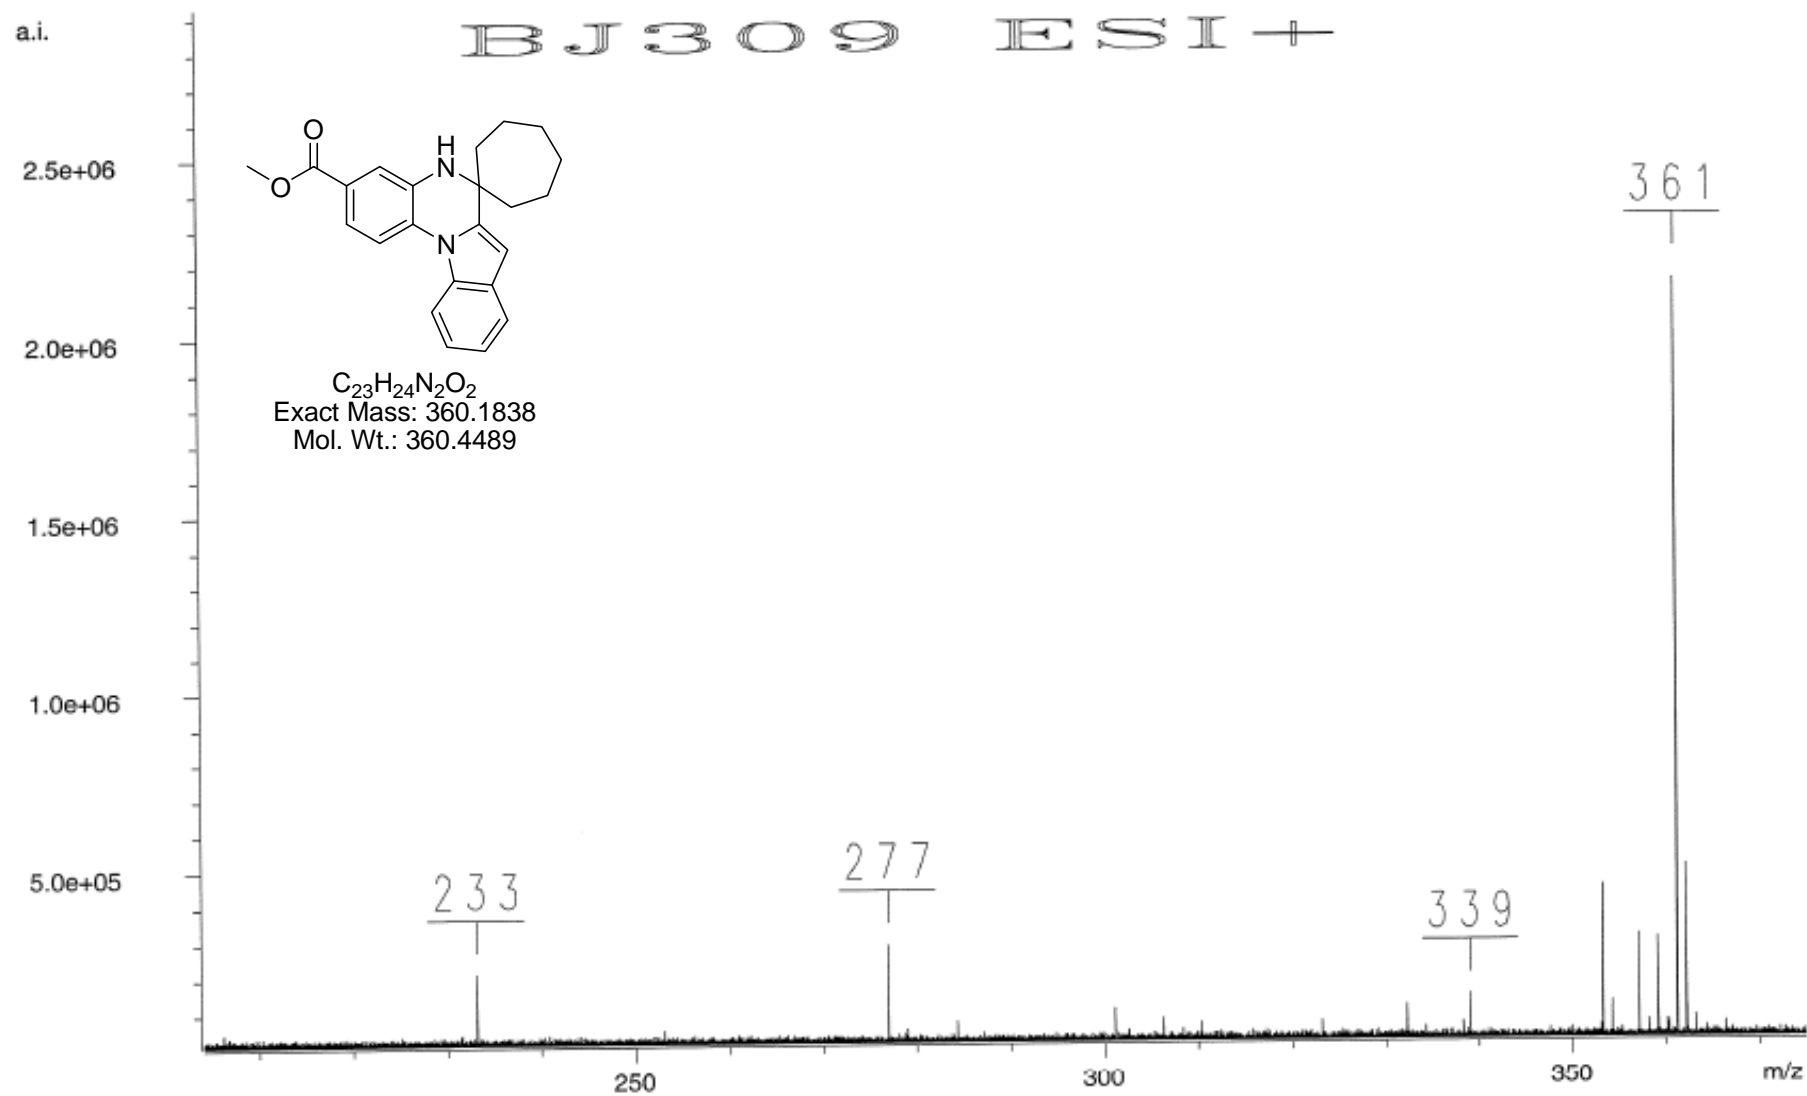

Low Resolution Mass Spectrum (LRMS) of compound **2b**

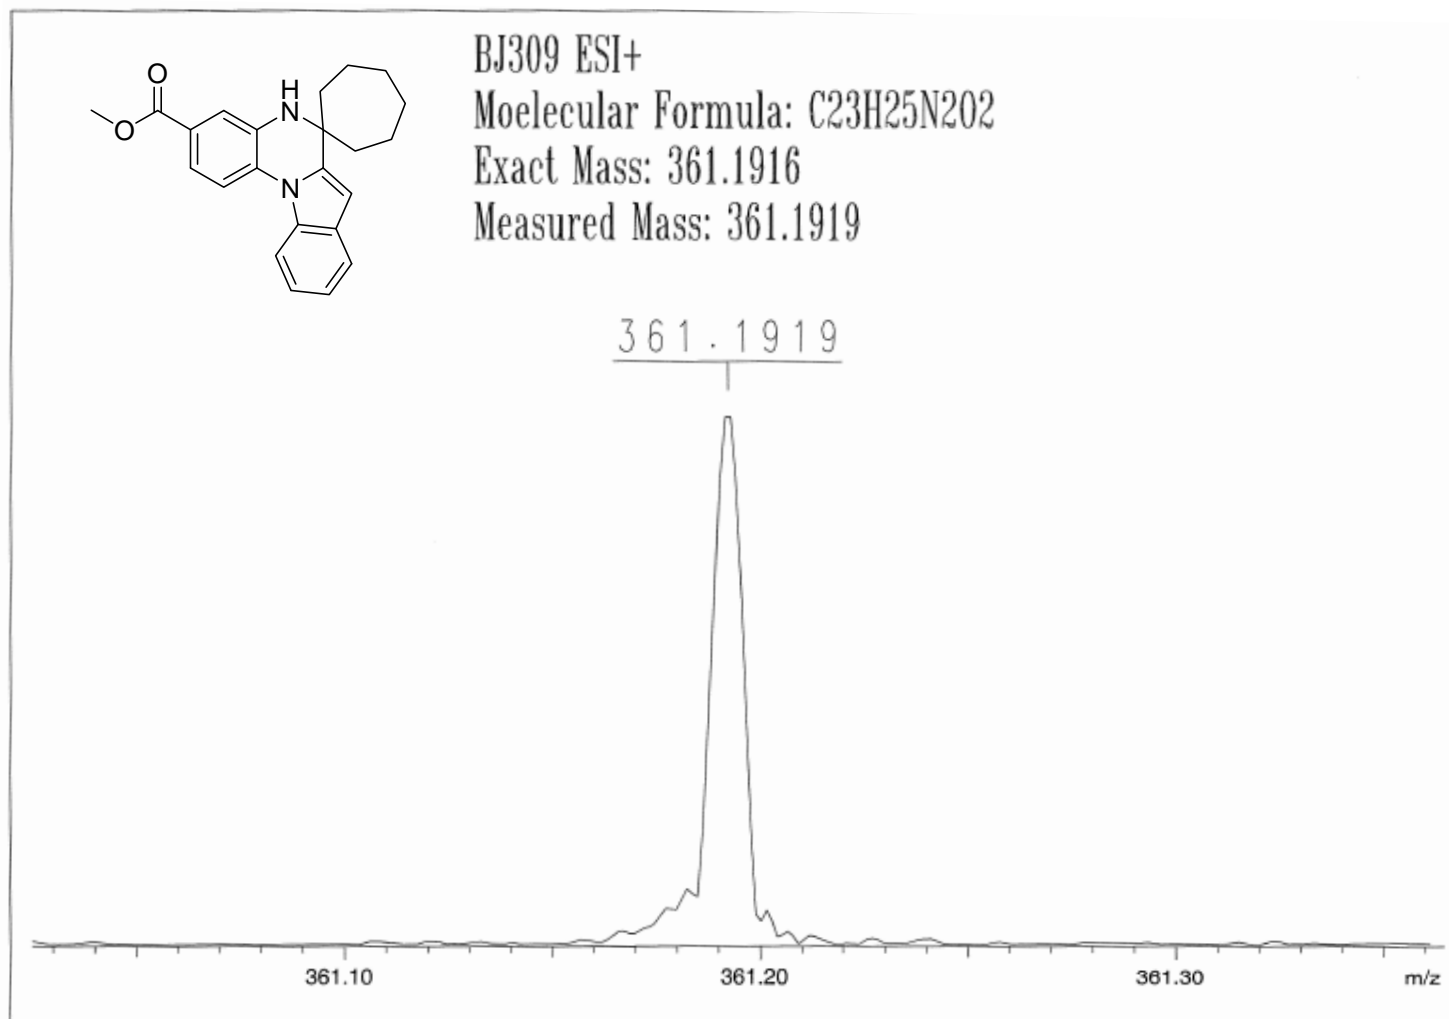

High Resolution Mass Spectrum (HRMS) of compound **2b**

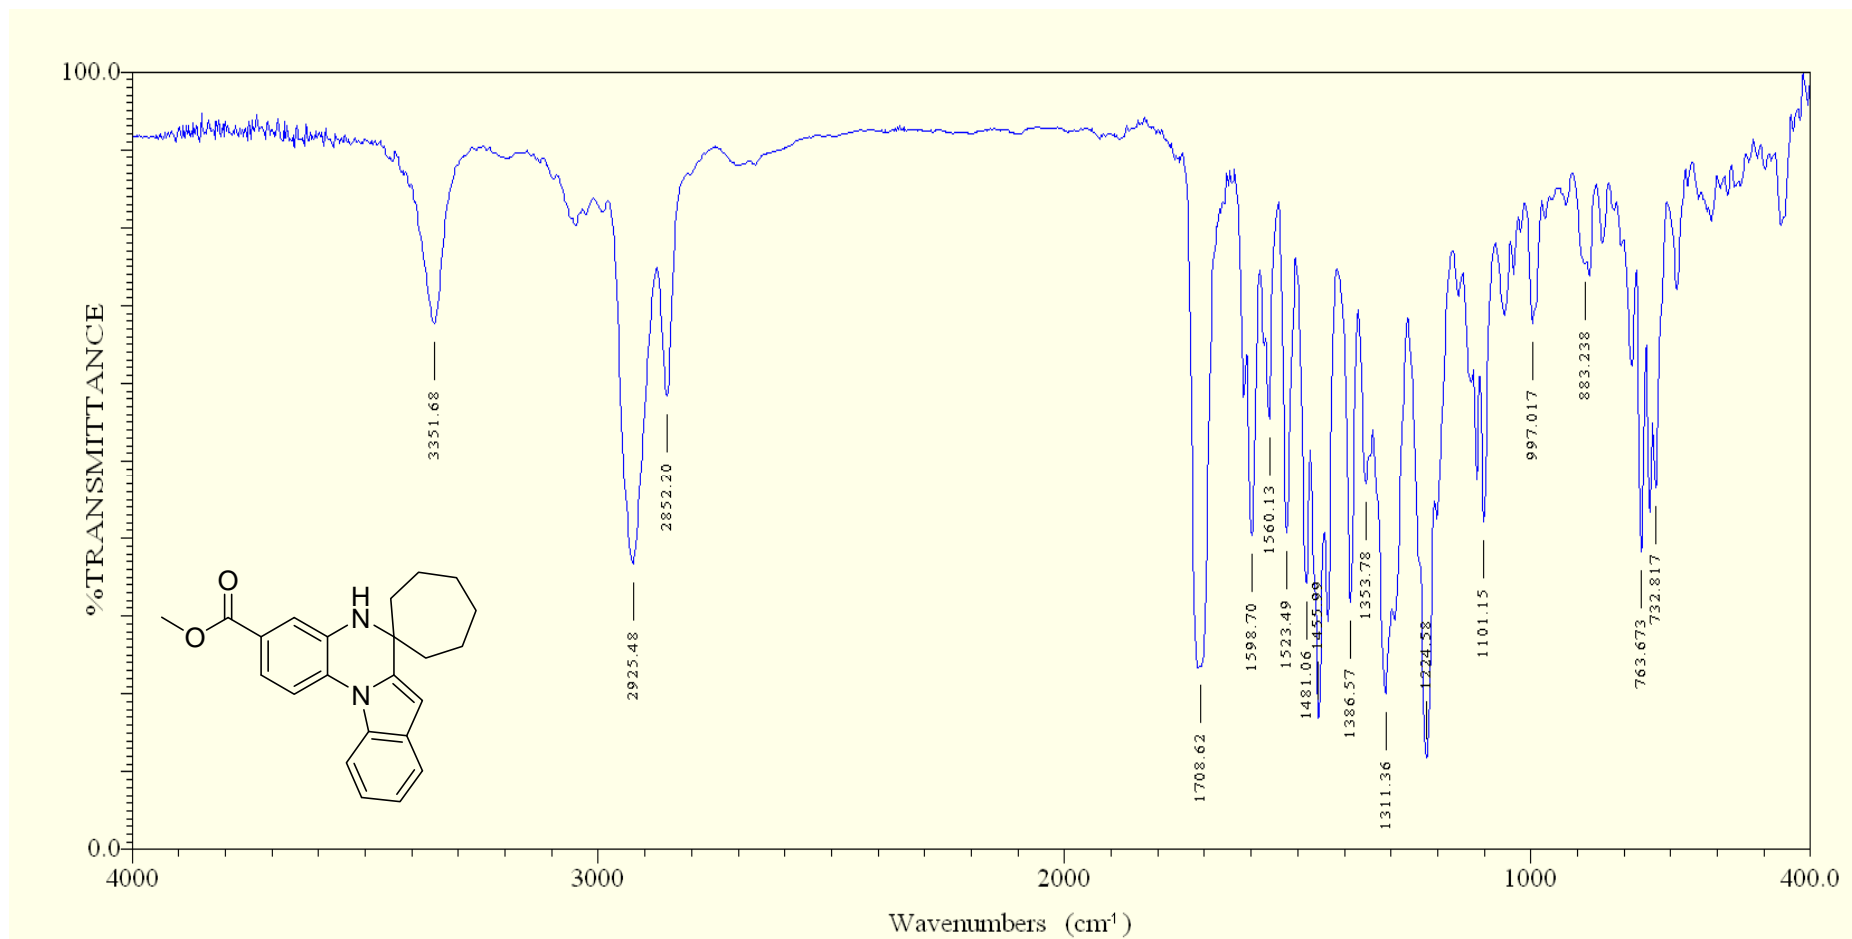

IR Spectrum of compound **2b** (Neat)

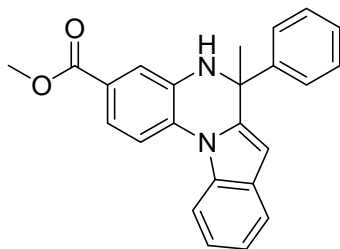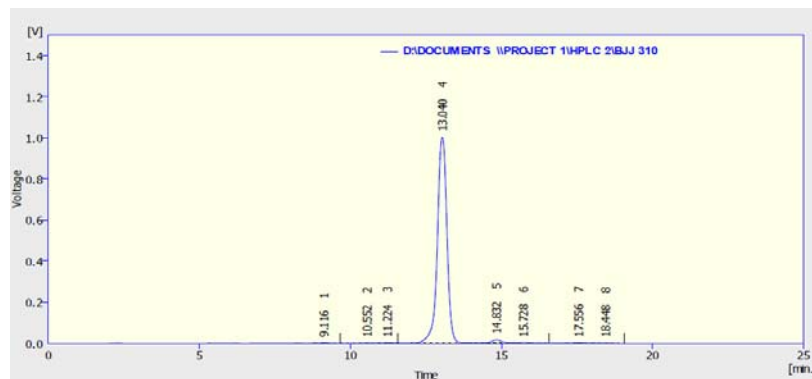

|   | Reten. Time [min] | Area [mV.s] | Height [mV] | Area [%] | Height [%] | W05 [min] |
|---|-------------------|-------------|-------------|----------|------------|-----------|
| 1 | 9.116             | 38.630      | 2.751       | 0.2      | 0.3        | 0.21      |
| 2 | 10.552            | 32.761      | 1.397       | 0.1      | 0.1        | 0.36      |
| 3 | 11.224            | 35.667      | 2.158       | 0.2      | 0.2        | 0.26      |
| 4 | 13.040            | 22037.280   | 1002.157    | 96.8     | 97.0       | 0.33      |
| 5 | 14.832            | 429.280     | 17.256      | 1.9      | 1.7        | 0.34      |
| 6 | 15.728            | 102.909     | 3.753       | 0.5      | 0.4        | 0.38      |
| 7 | 17.556            | 61.324      | 2.530       | 0.3      | 0.2        | 0.37      |
| 8 | 18.448            | 32.302      | 1.059       | 0.1      | 0.1        | 0.62      |
|   | Total             | 22770.154   | 1033.061    | 100.0    | 100.0      |           |

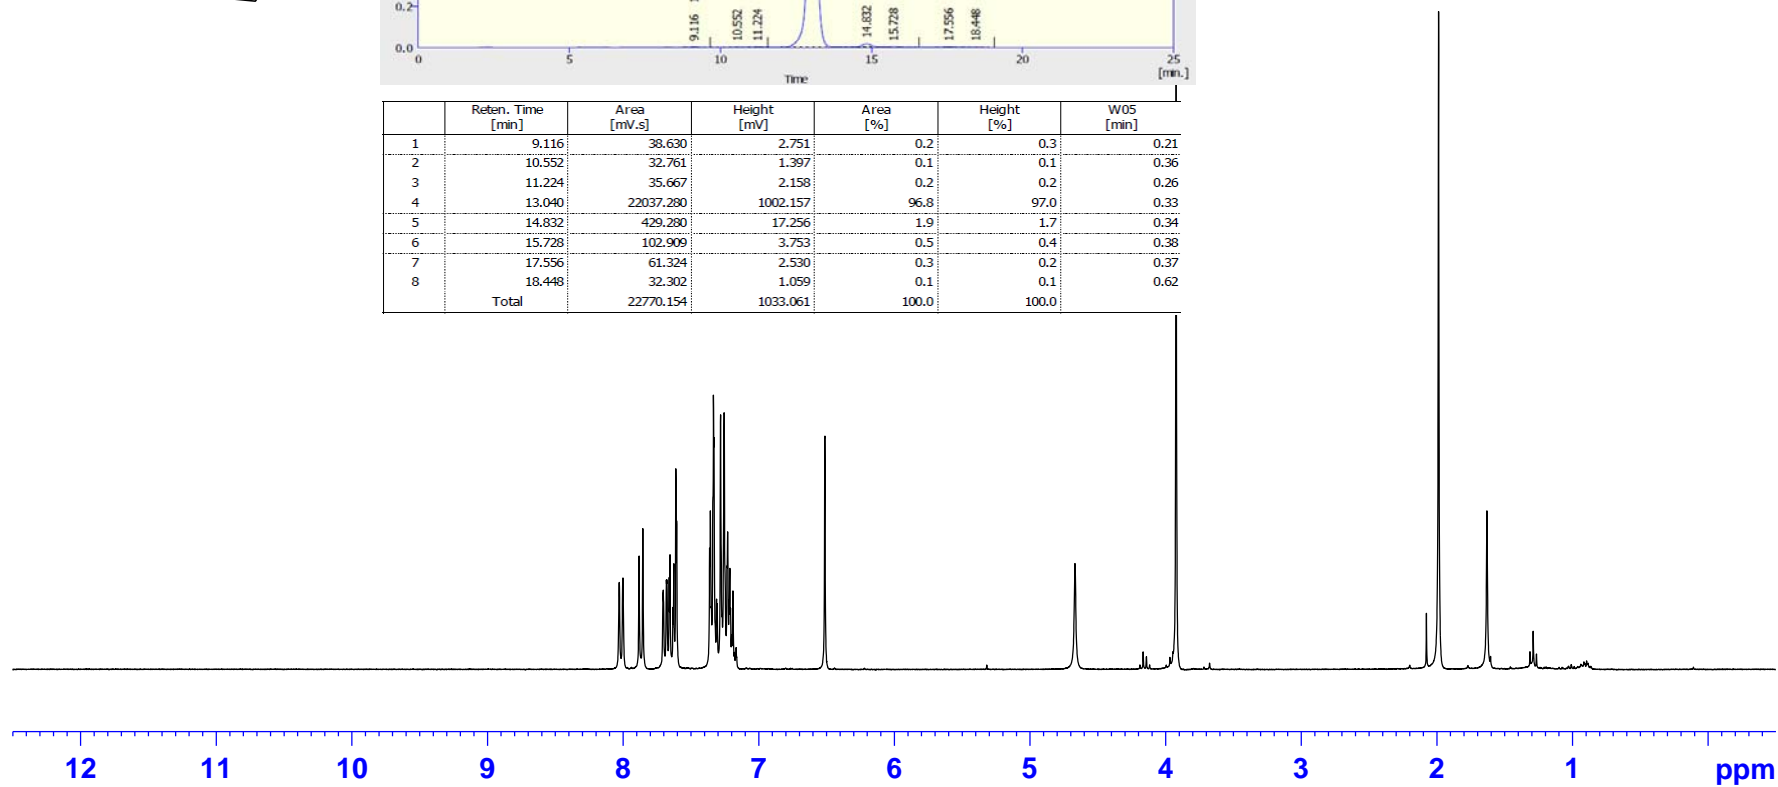

HPLC and  $^1\text{H}$  NMR Spectrum (300 MHz) of compound **2c** in  $\text{CDCl}_3$



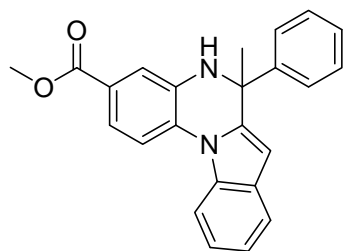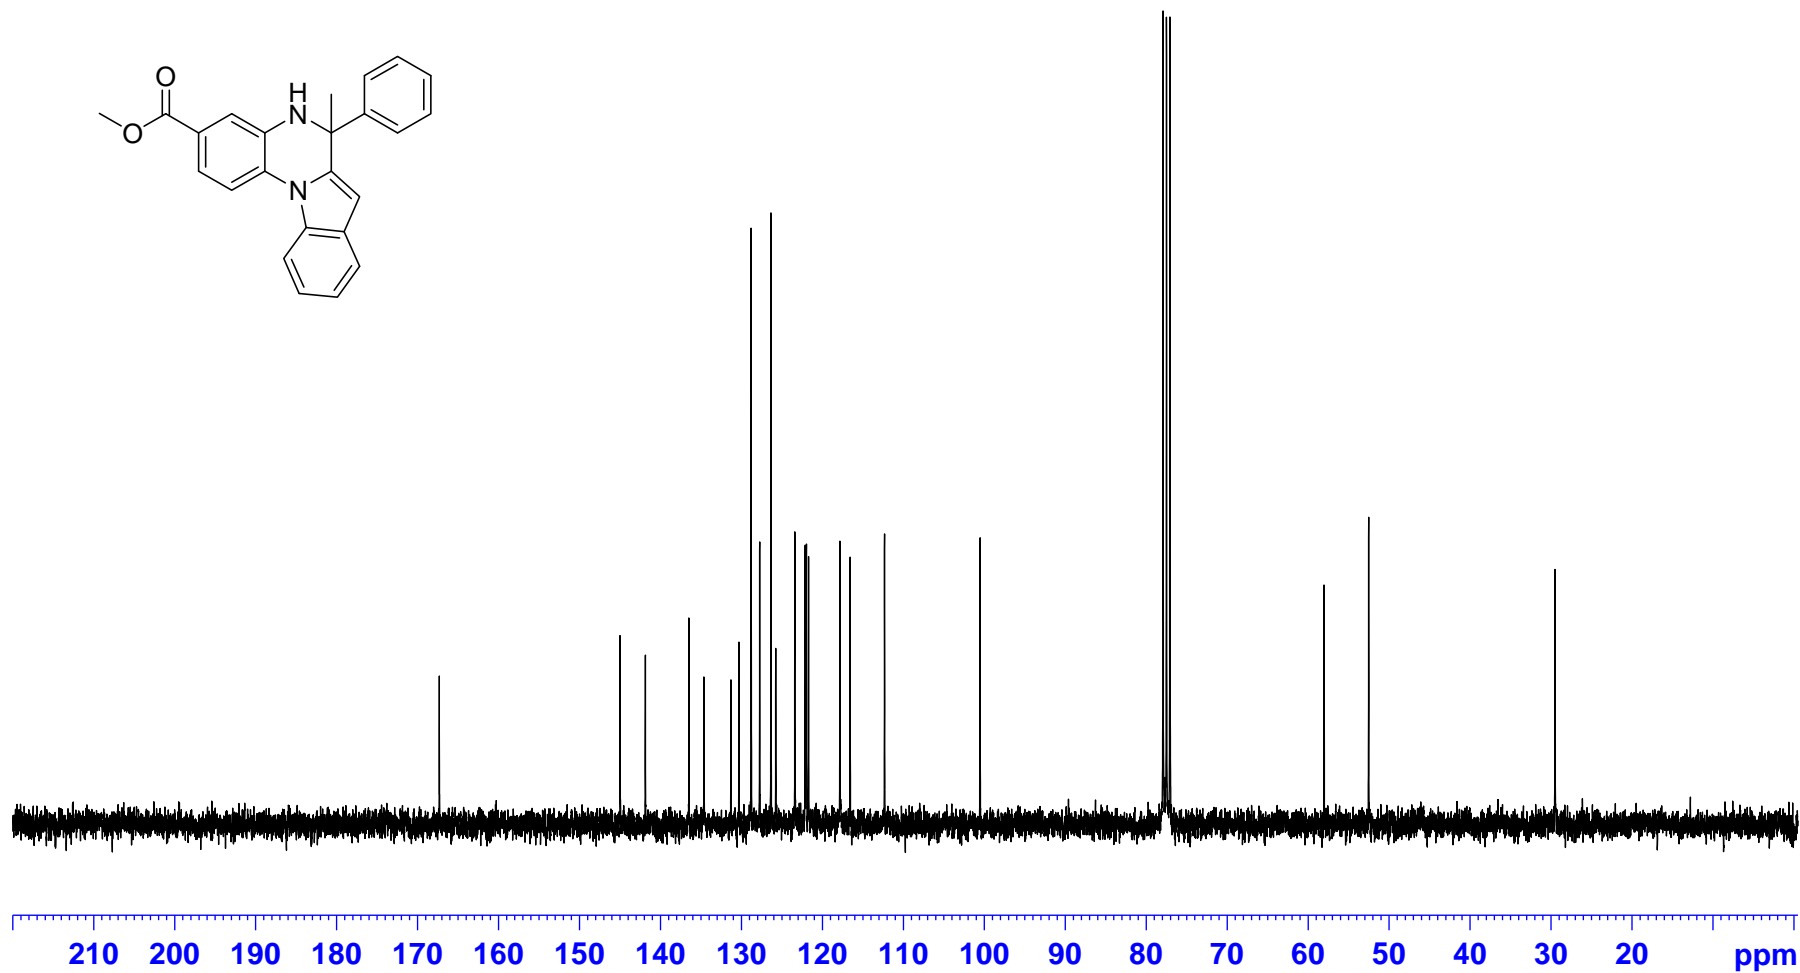

<sup>13</sup>C NMR Spectrum (75 MHz) of compound **2c** in CDCl<sub>3</sub>

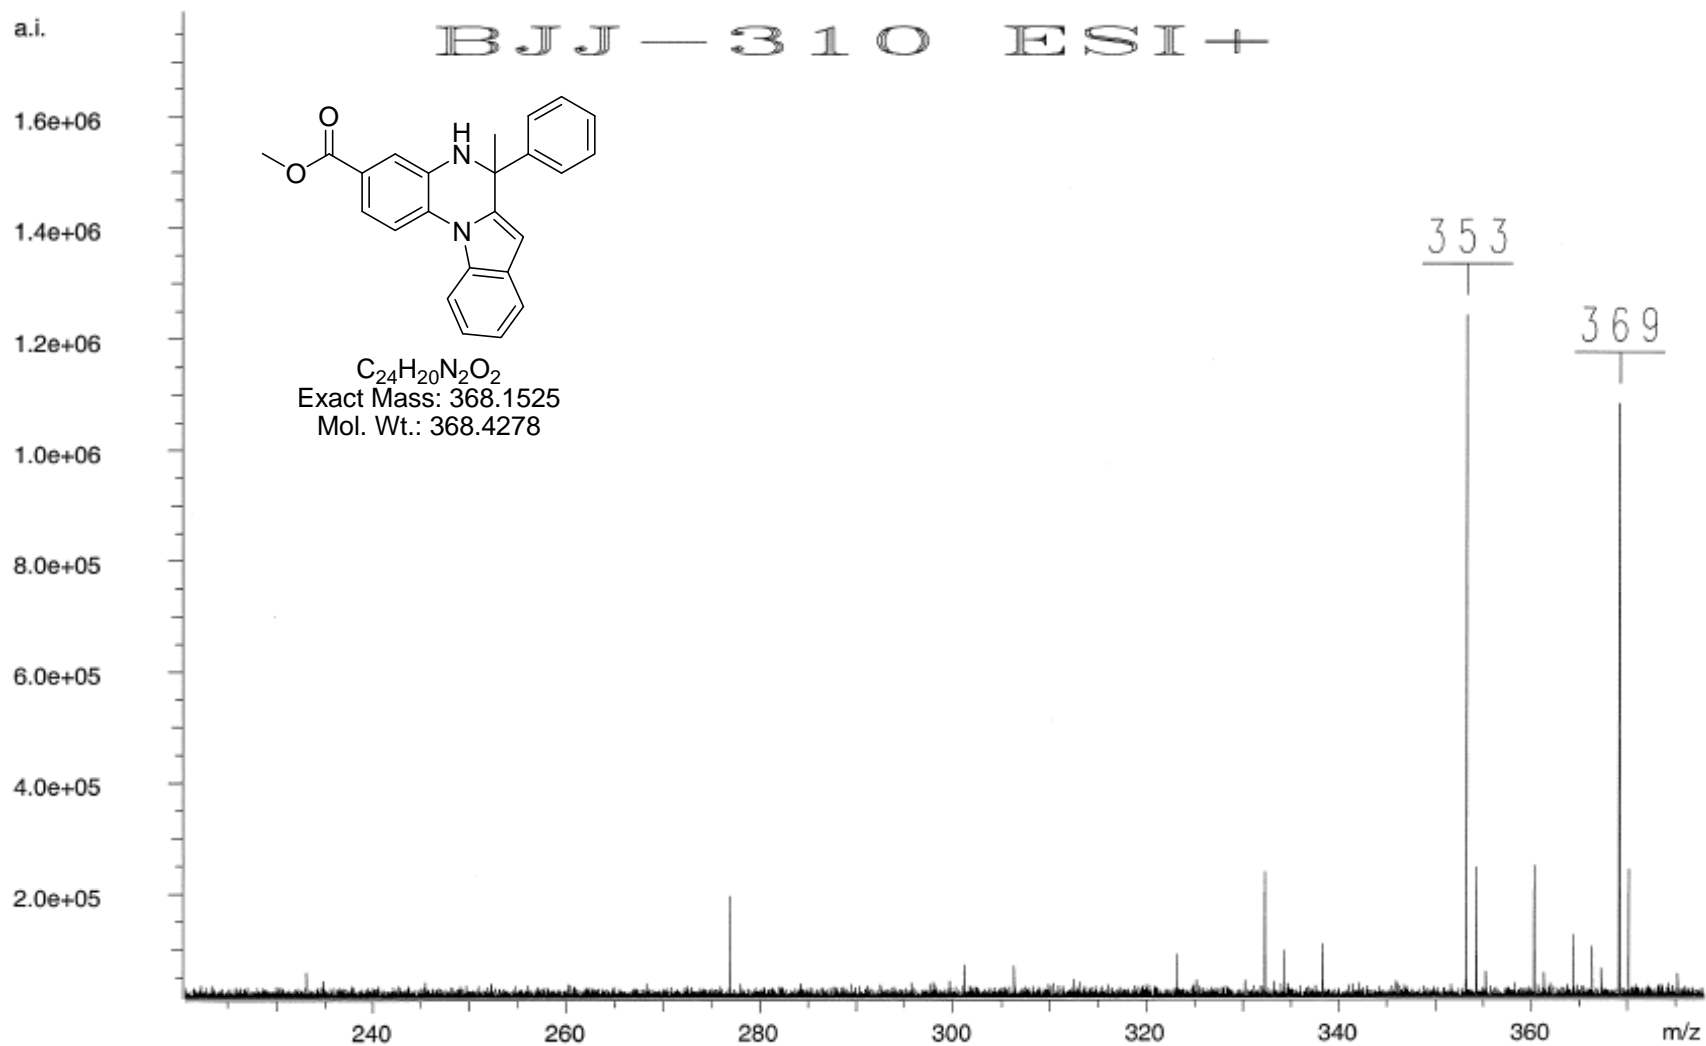

Low Resolution Mass Spectrum (LRMS) of compound **2c**

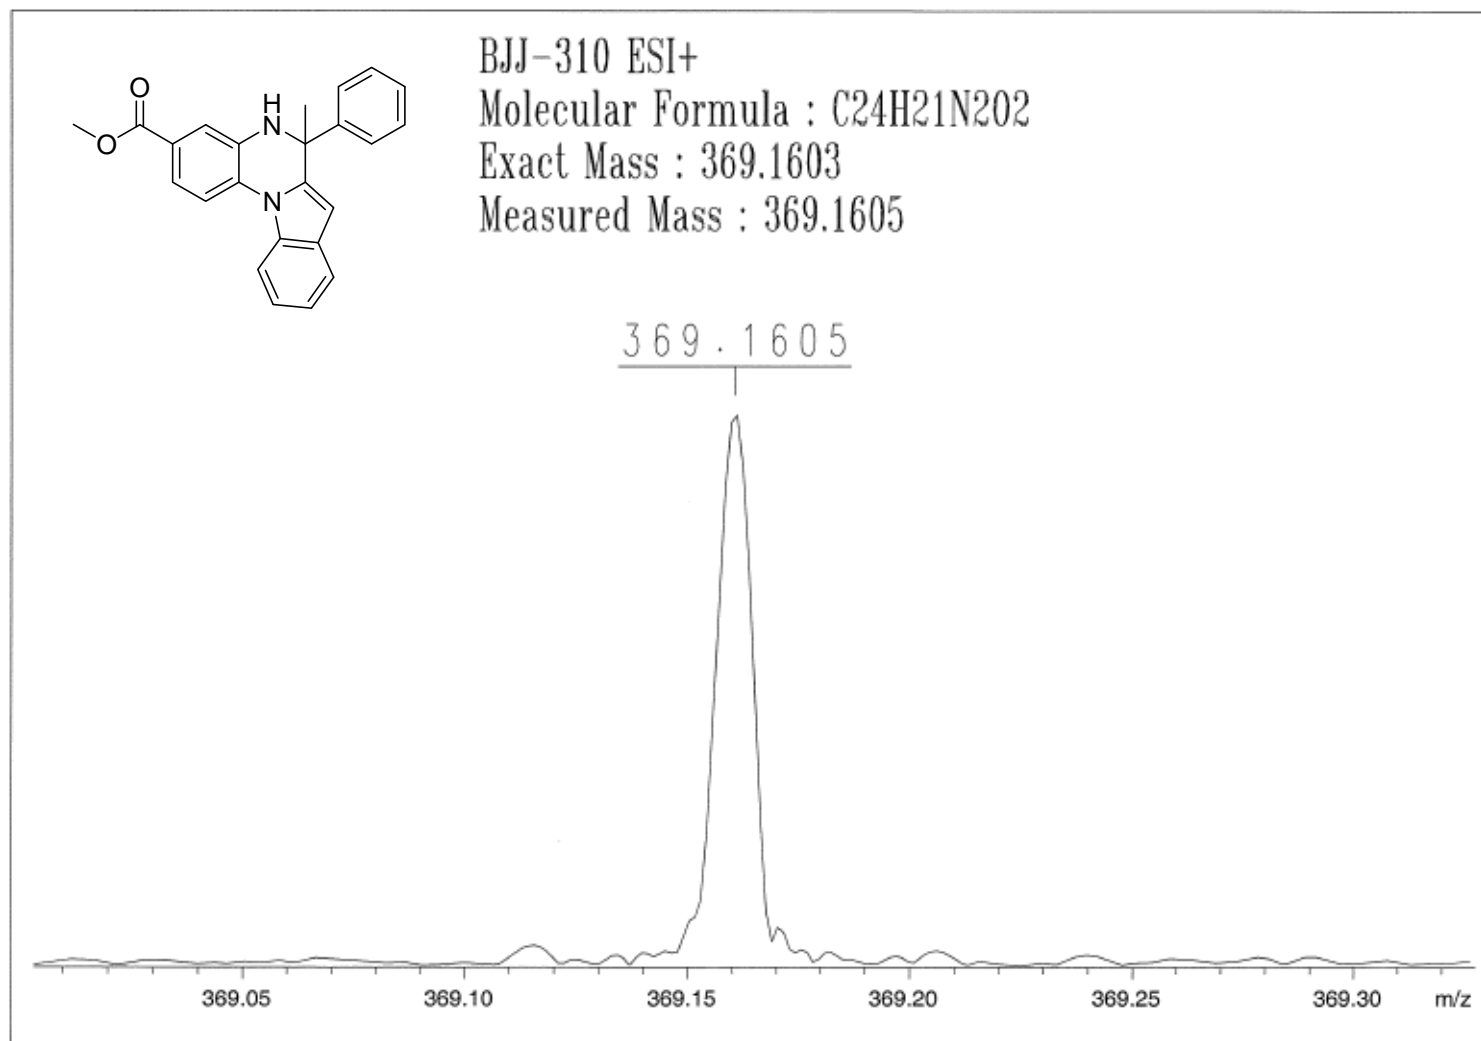

High Resolution Mass Spectrum (HRMS) of compound **2c**

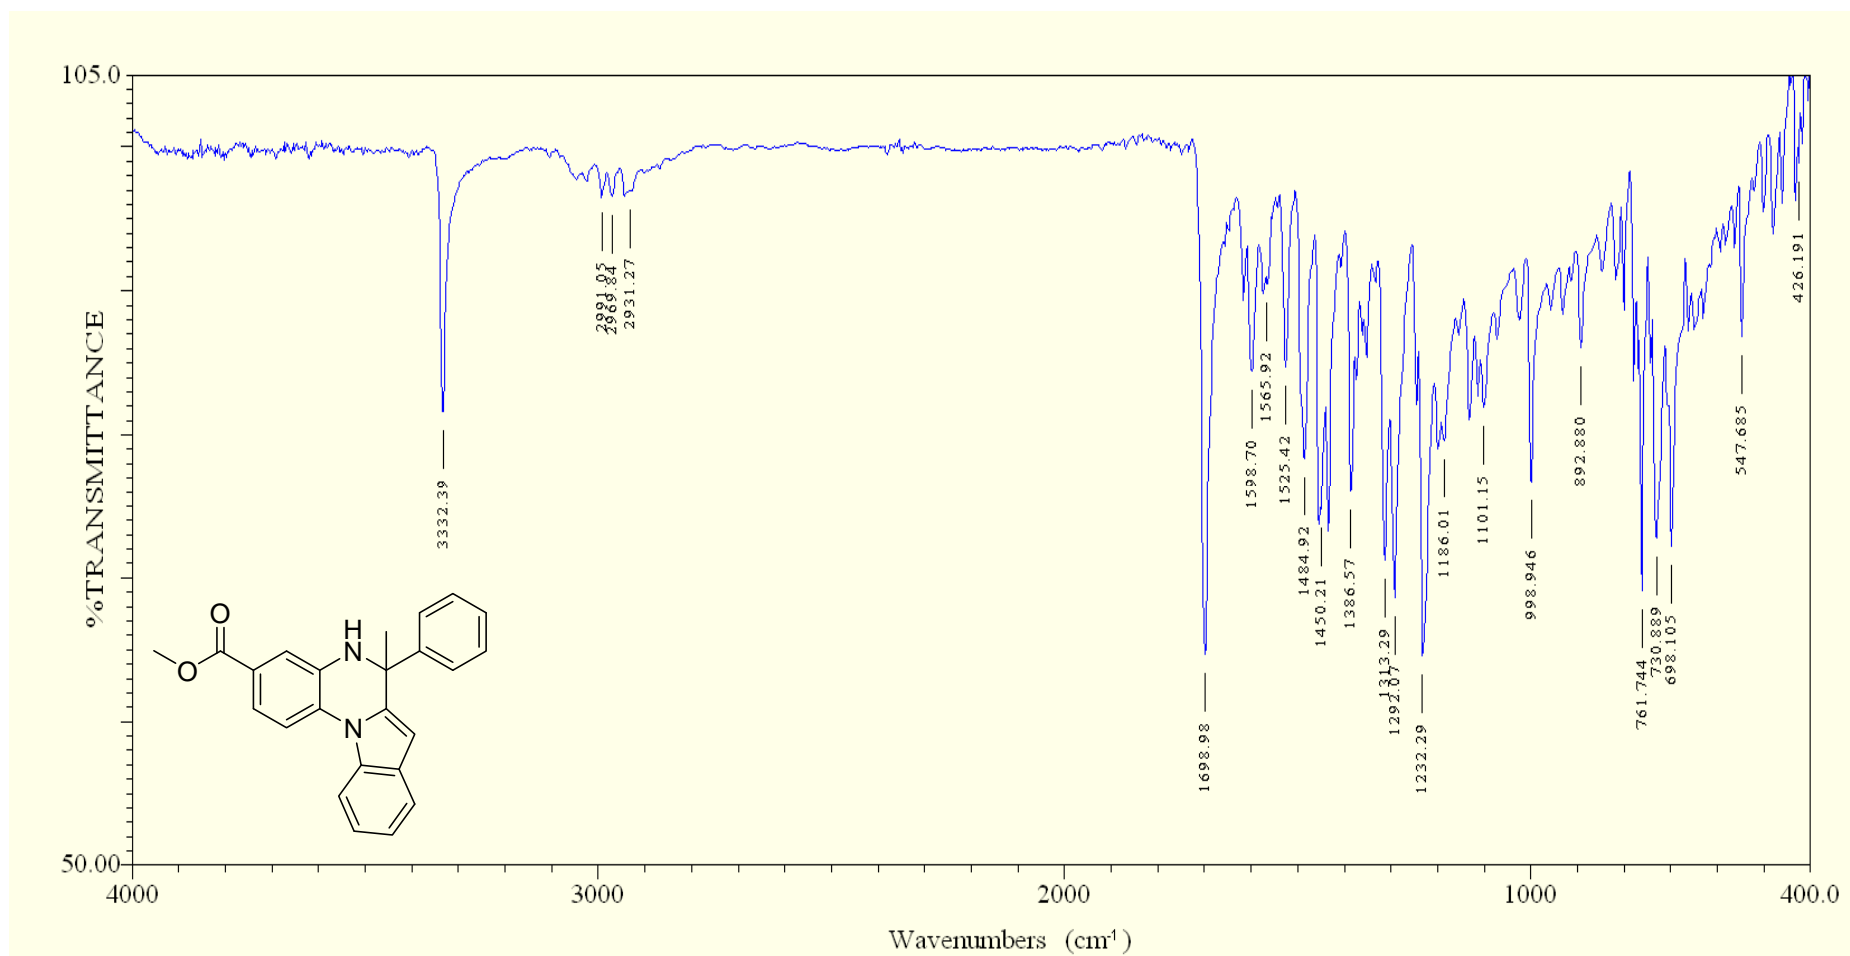

IR Spectrum of compound 2c (Neat)

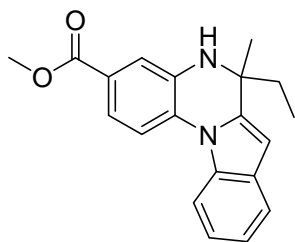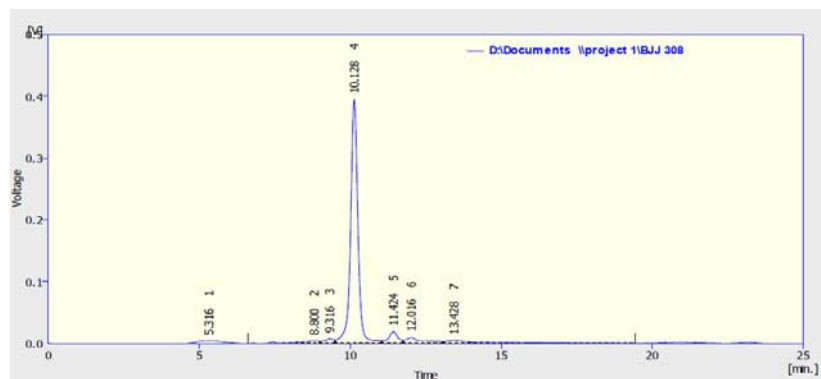

|   | Reten. Time [min] | Area [mV.s] | Height [mV] | Area [%] | Height [%] | W05 [min] |
|---|-------------------|-------------|-------------|----------|------------|-----------|
| 1 | 5.316             | 283.379     | 4.396       | 3.3      | 1.0        | 1.03      |
| 2 | 8.800             | 157.530     | 3.871       | 1.9      | 0.9        | 0.74      |
| 3 | 9.316             | 161.633     | 7.331       | 1.9      | 1.7        | 0.41      |
| 4 | 10.128            | 6669.596    | 394.836     | 78.6     | 89.0       | 0.24      |
| 5 | 11.424            | 407.687     | 18.796      | 4.8      | 4.2        | 0.30      |
| 6 | 12.016            | 380.713     | 9.275       | 4.5      | 2.1        | 0.48      |
| 7 | 13.428            | 423.097     | 5.165       | 5.0      | 1.2        | 0.73      |
|   | Total             | 8483.635    | 443.720     | 100.0    | 100.0      |           |

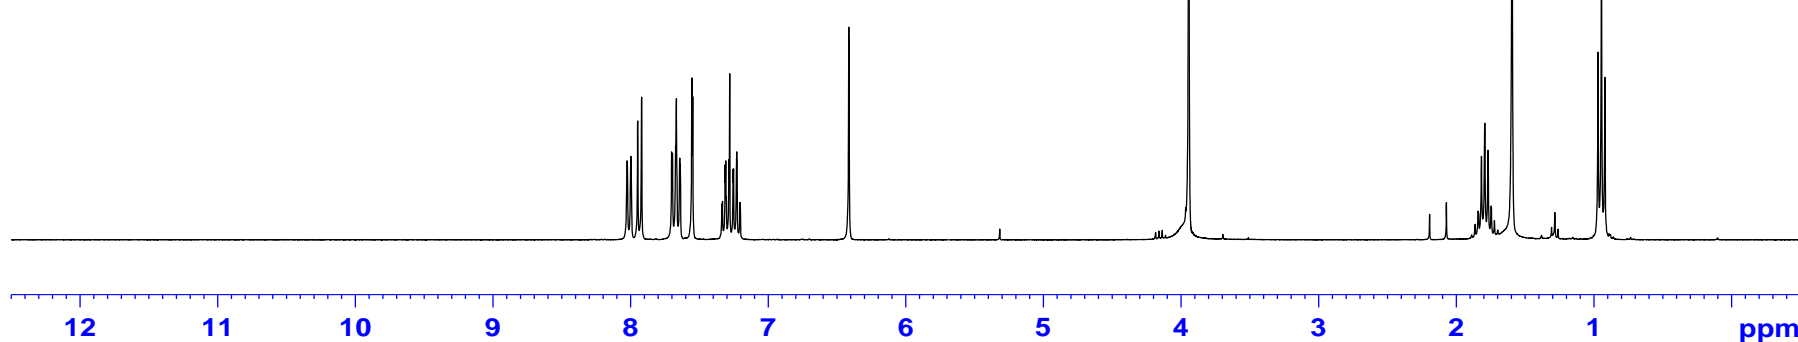

HPLC and  $^1\text{H}$  NMR Spectrum (300 MHz) of compound **2d** in  $\text{CDCl}_3$

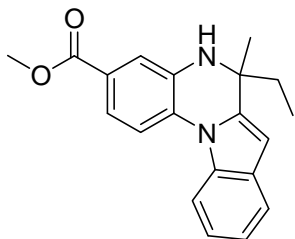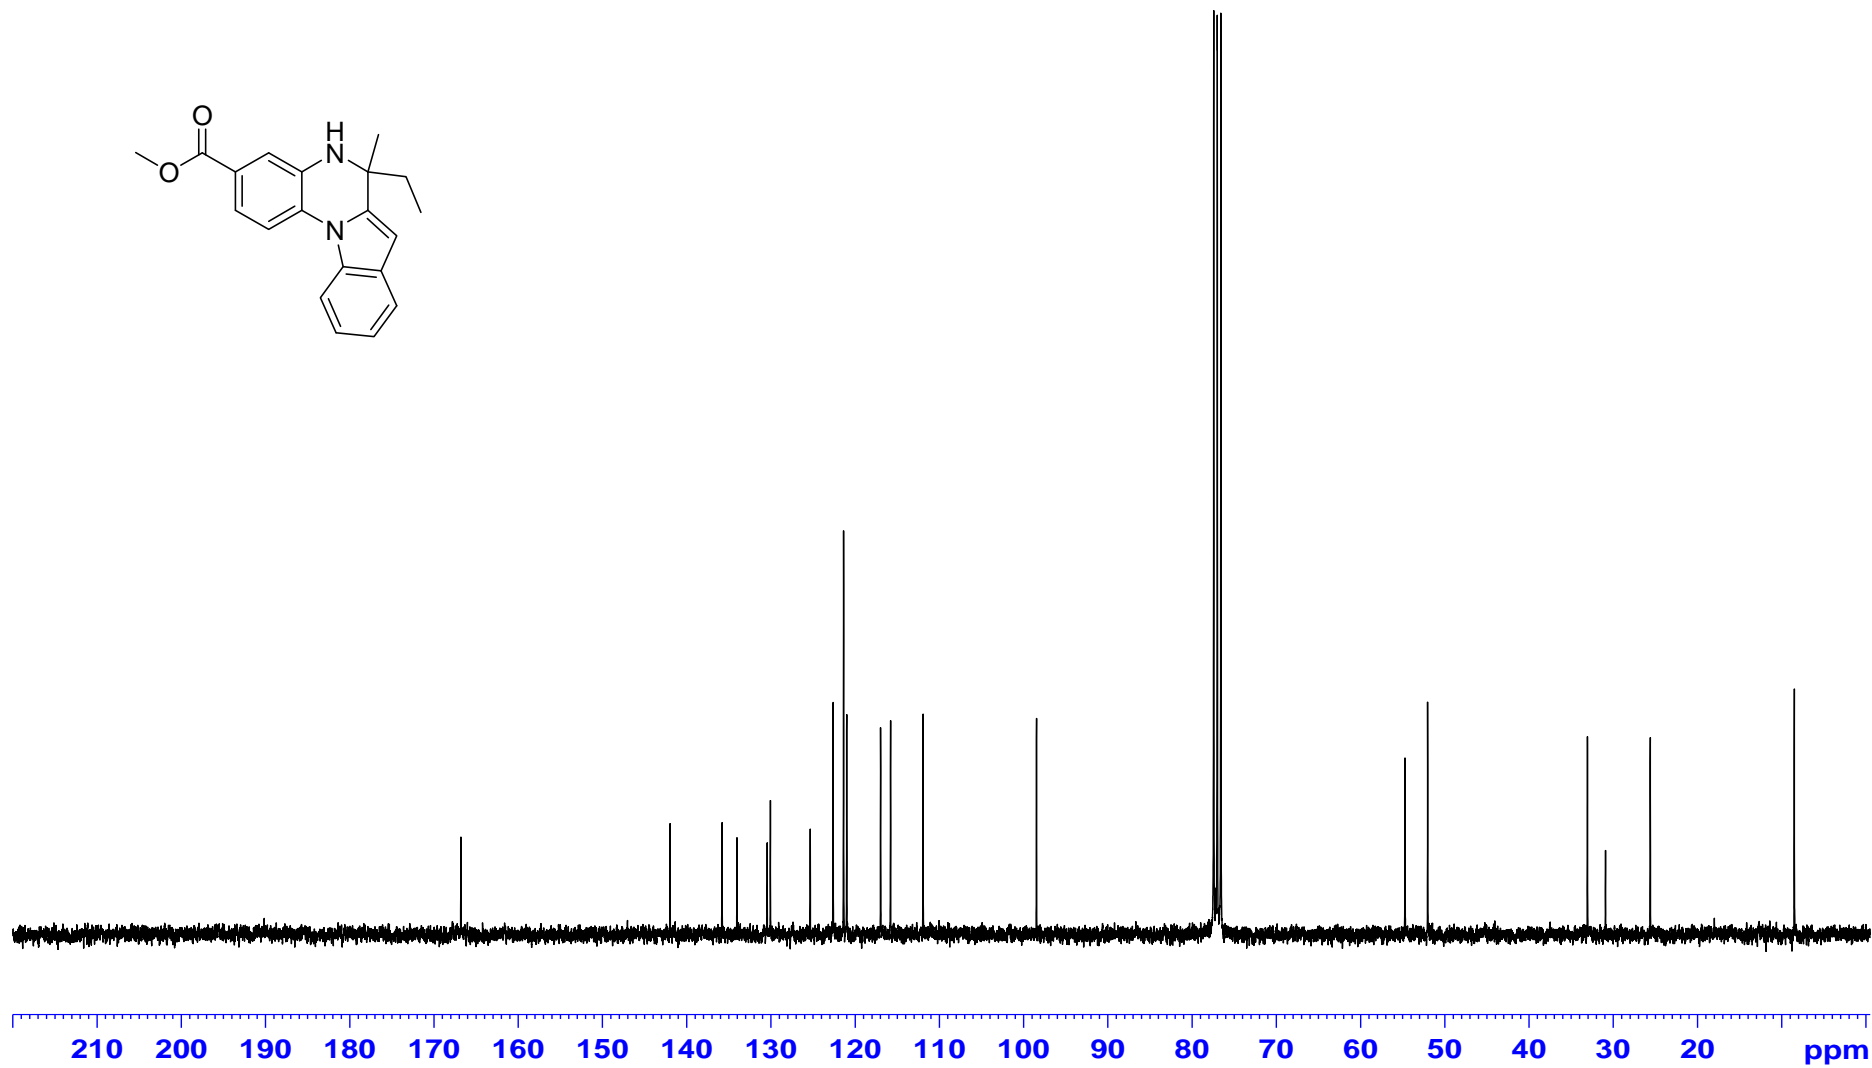

<sup>13</sup>C NMR Spectrum (75 MHz) of compound **2d** in CDCl<sub>3</sub>

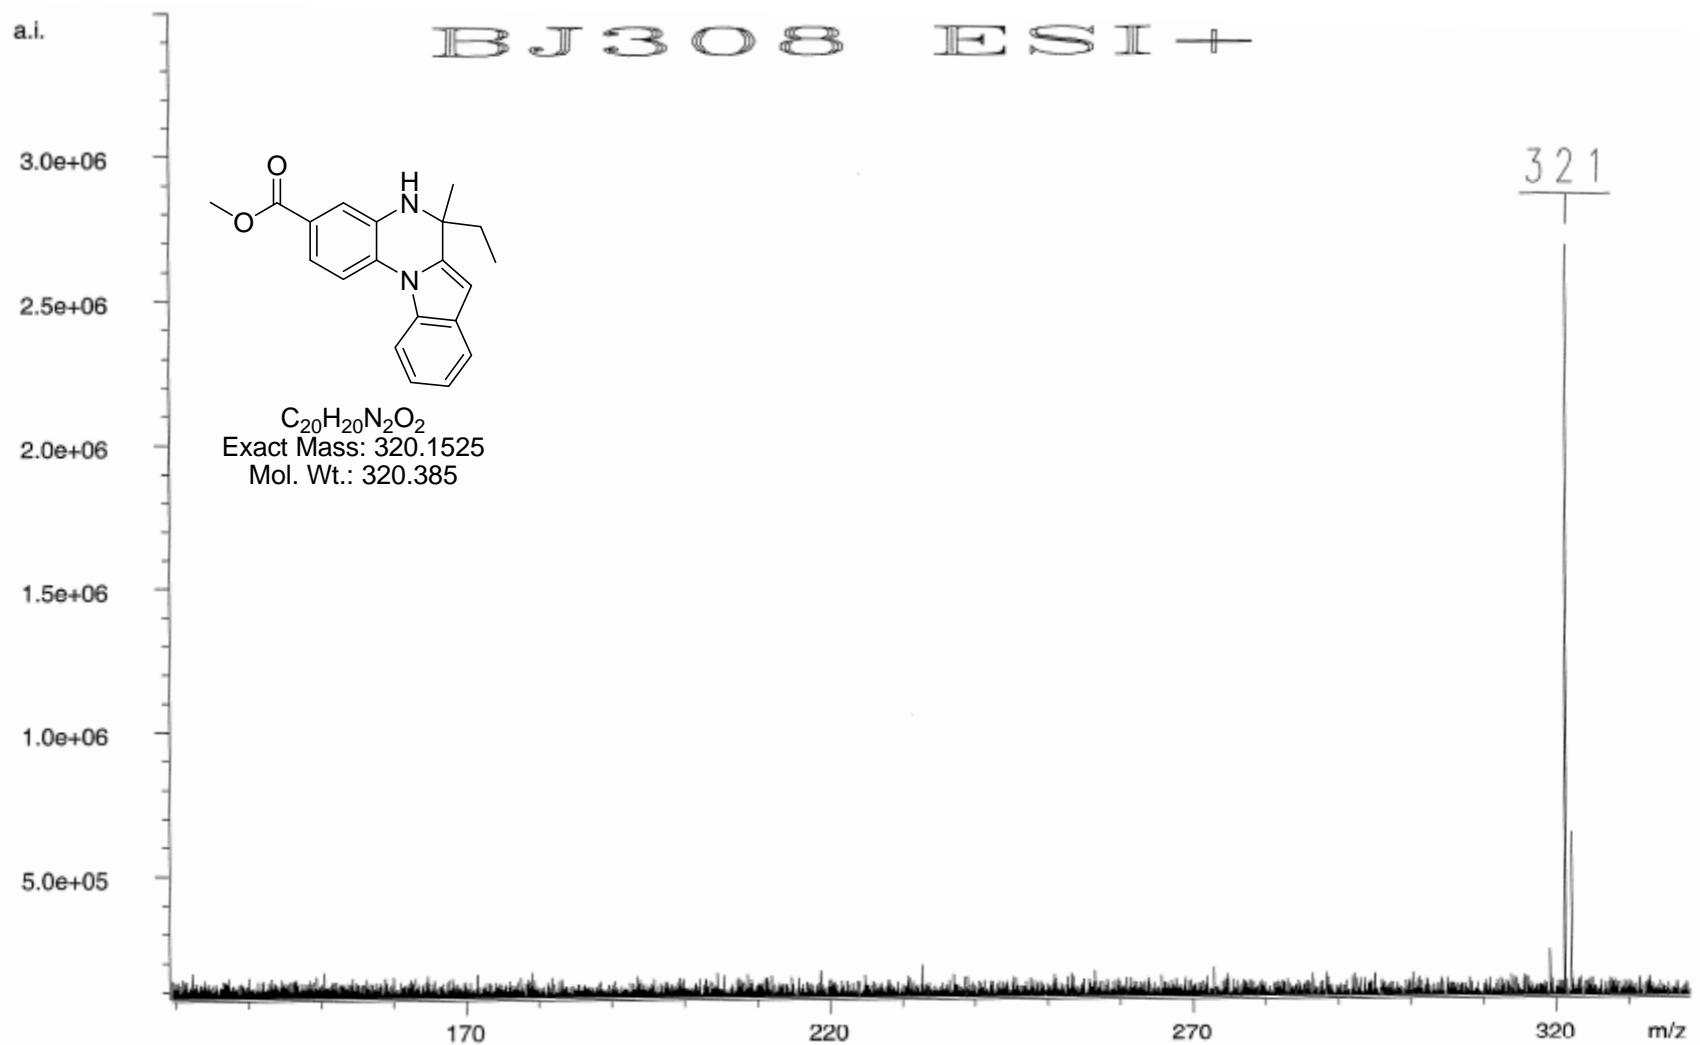

Low Resolution Mass Spectrum (LRMS) of compound **2d**

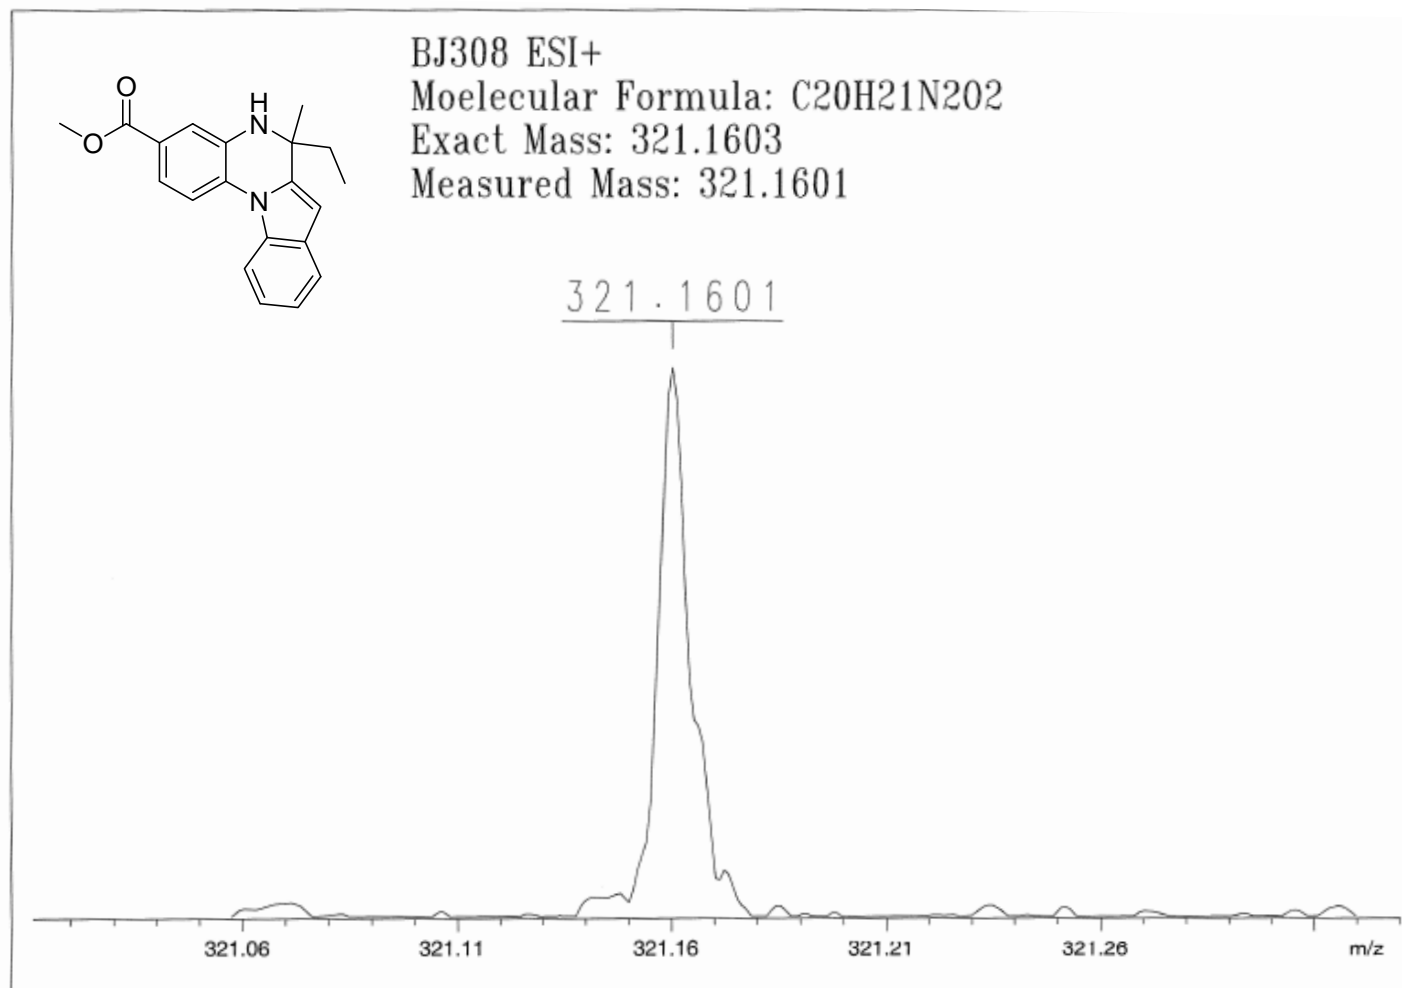

High Resolution Mass Spectrum (HRMS) of compound **2d**



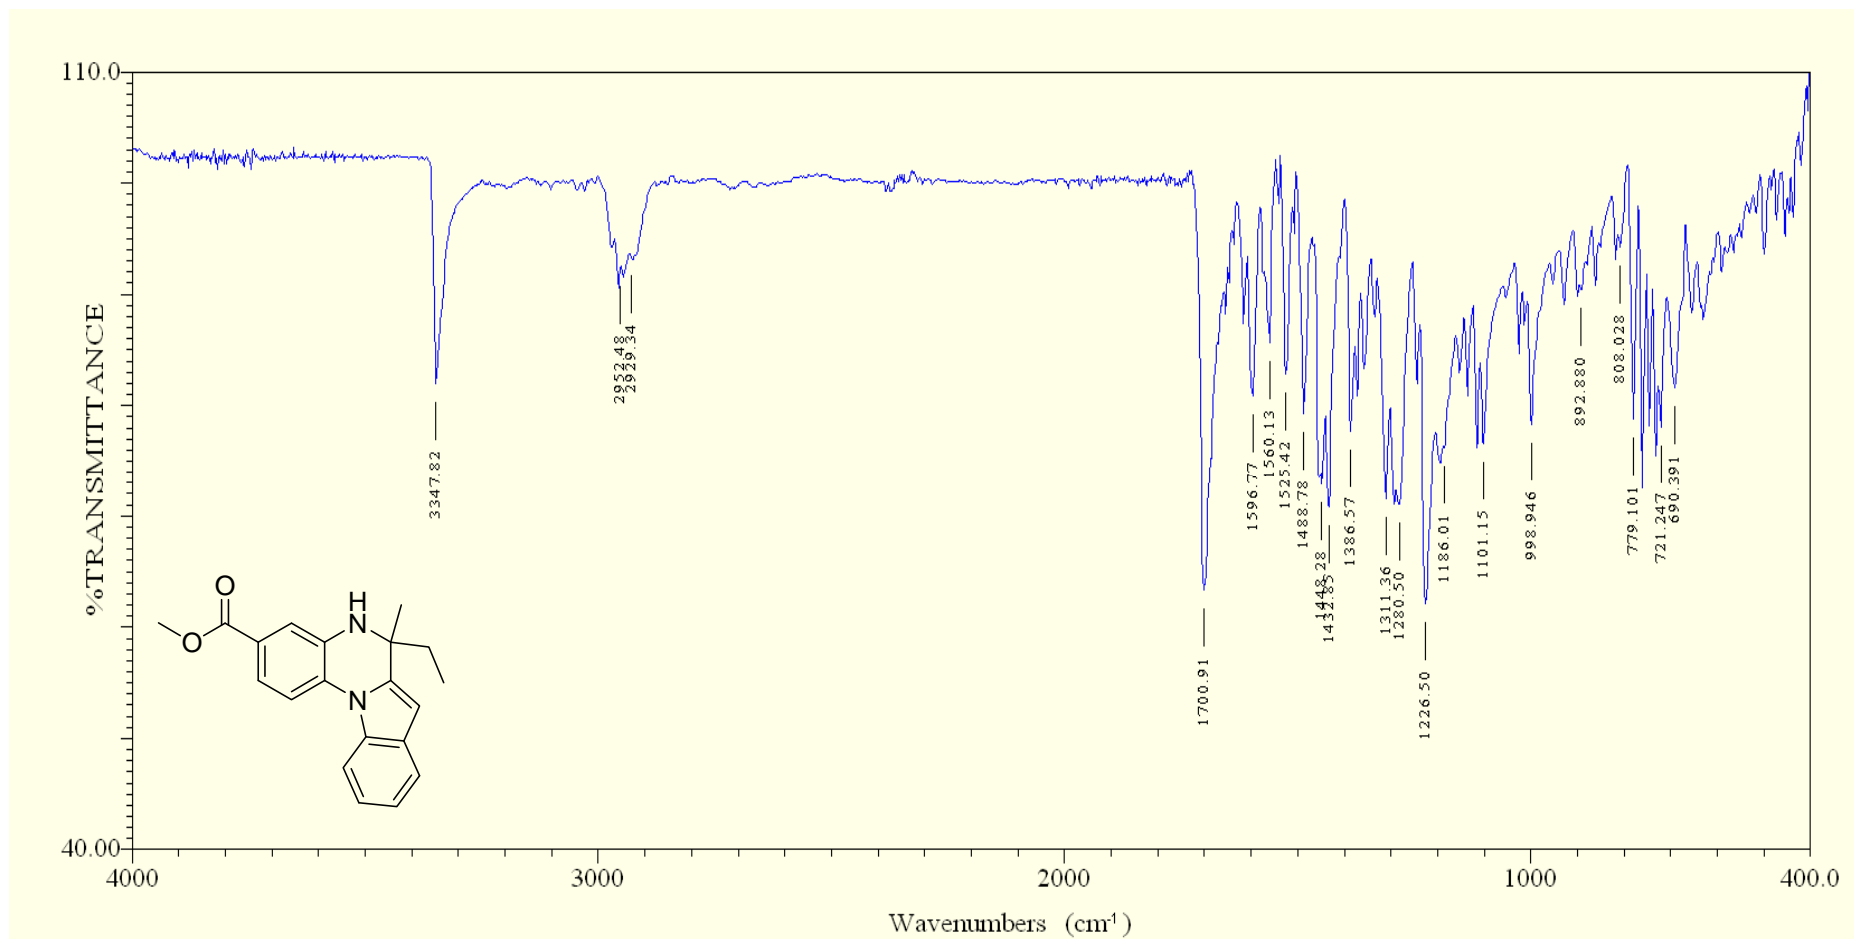

IR Spectrum of compound 2d (Neat)

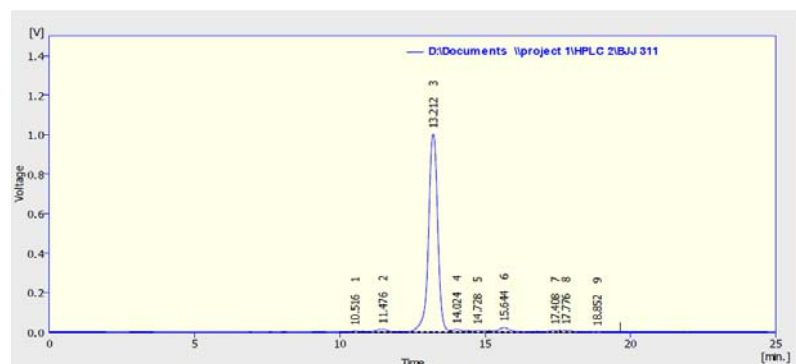

|   | Reten. Time [min] | Area [mV.s] | Height [mV] | Area [%] | Height [%] | W05 [min] |
|---|-------------------|-------------|-------------|----------|------------|-----------|
| 1 | 10.516            | 78.073      | 4.780       | 0.3      | 0.4        | 0.24      |
| 2 | 11.476            | 413.636     | 13.979      | 1.7      | 1.3        | 0.44      |
| 3 | 13.212            | 22075.517   | 1001.303    | 90.9     | 92.7       | 0.33      |
| 4 | 14.024            | 337.264     | 13.393      | 1.4      | 1.2        | 0.44      |
| 5 | 14.728            | 256.059     | 7.686       | 1.1      | 0.7        | 0.73      |
| 6 | 15.644            | 673.558     | 22.358      | 2.8      | 2.1        | 0.38      |
| 7 | 17.408            | 180.354     | 6.979       | 0.7      | 0.6        | 0.39      |
| 8 | 17.776            | 201.880     | 7.729       | 0.8      | 0.7        | 0.43      |

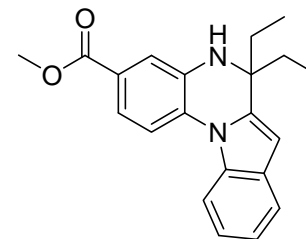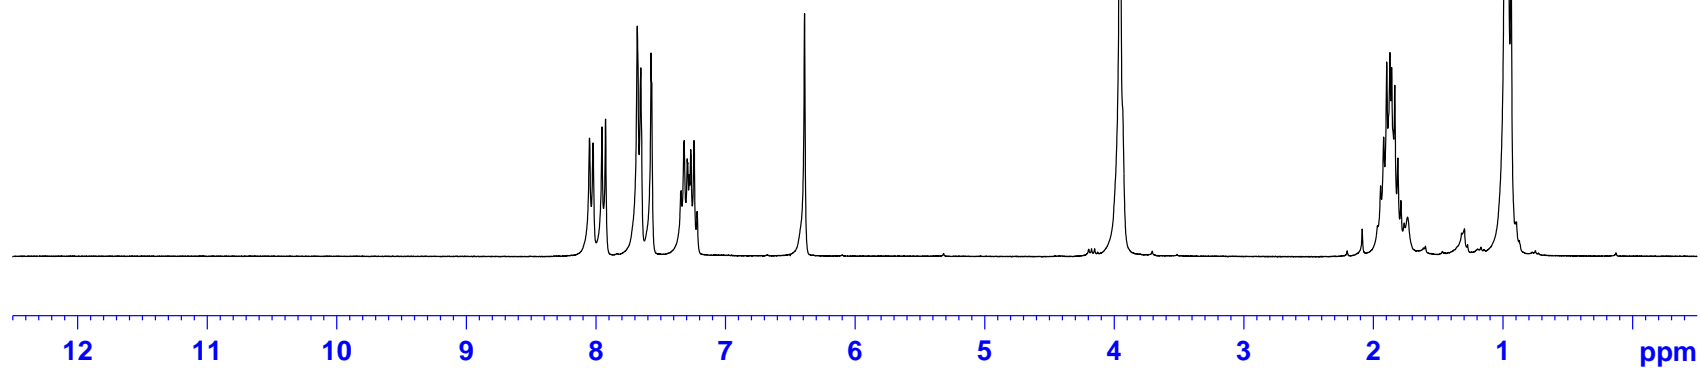

HPLC and <sup>1</sup>H NMR Spectrum (300 MHz) of compound **2e** in CDCl<sub>3</sub>

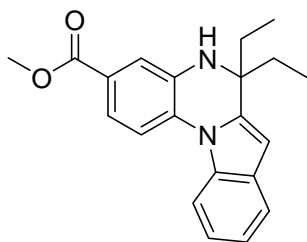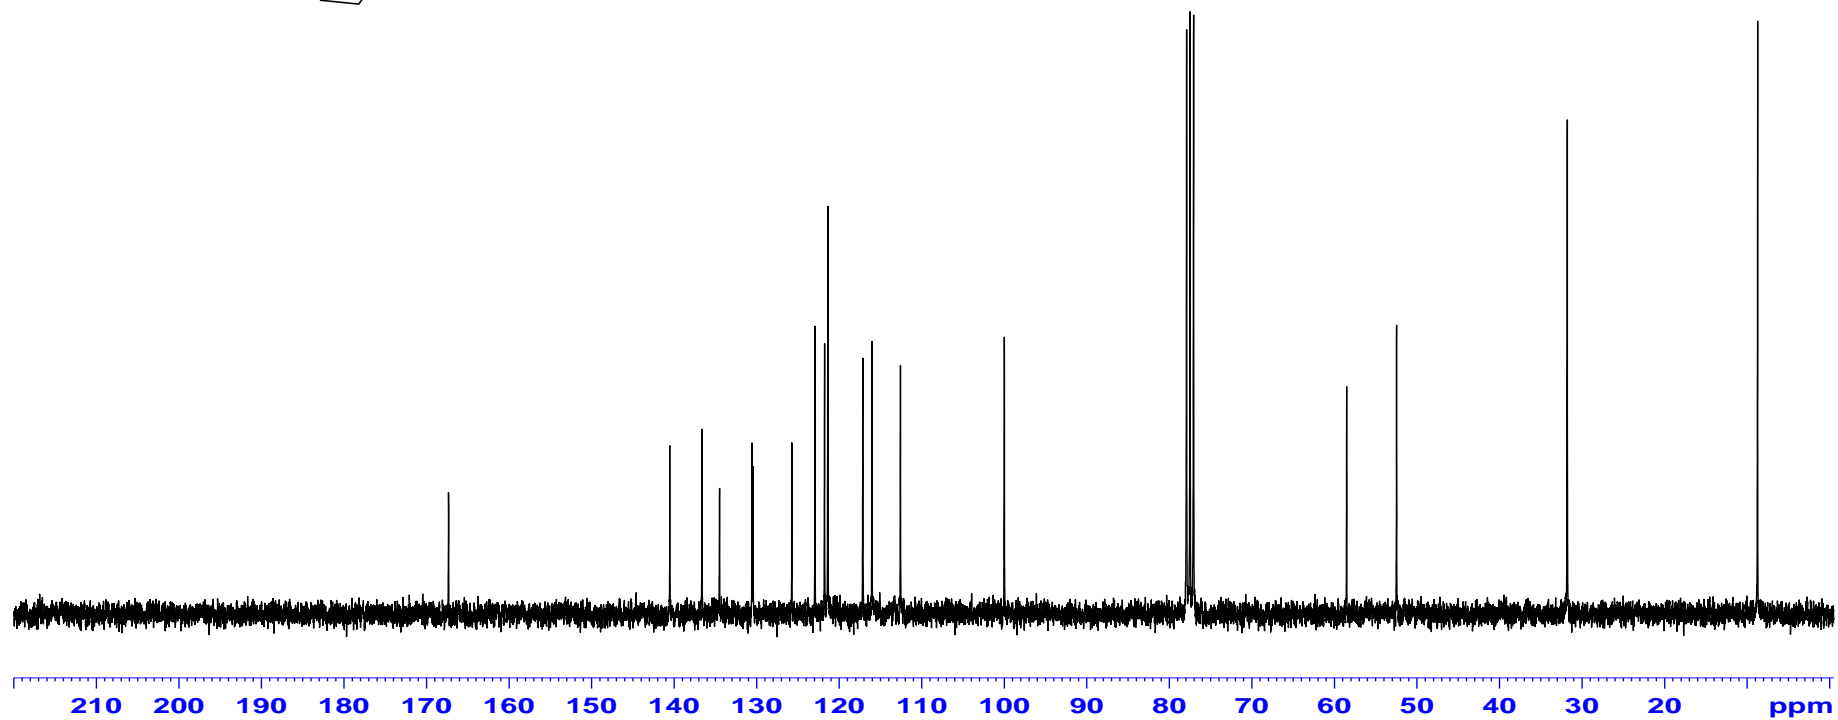

$^{13}\text{C}$  NMR Spectrum (75 MHz) of compound **2e** in  $\text{CDCl}_3$

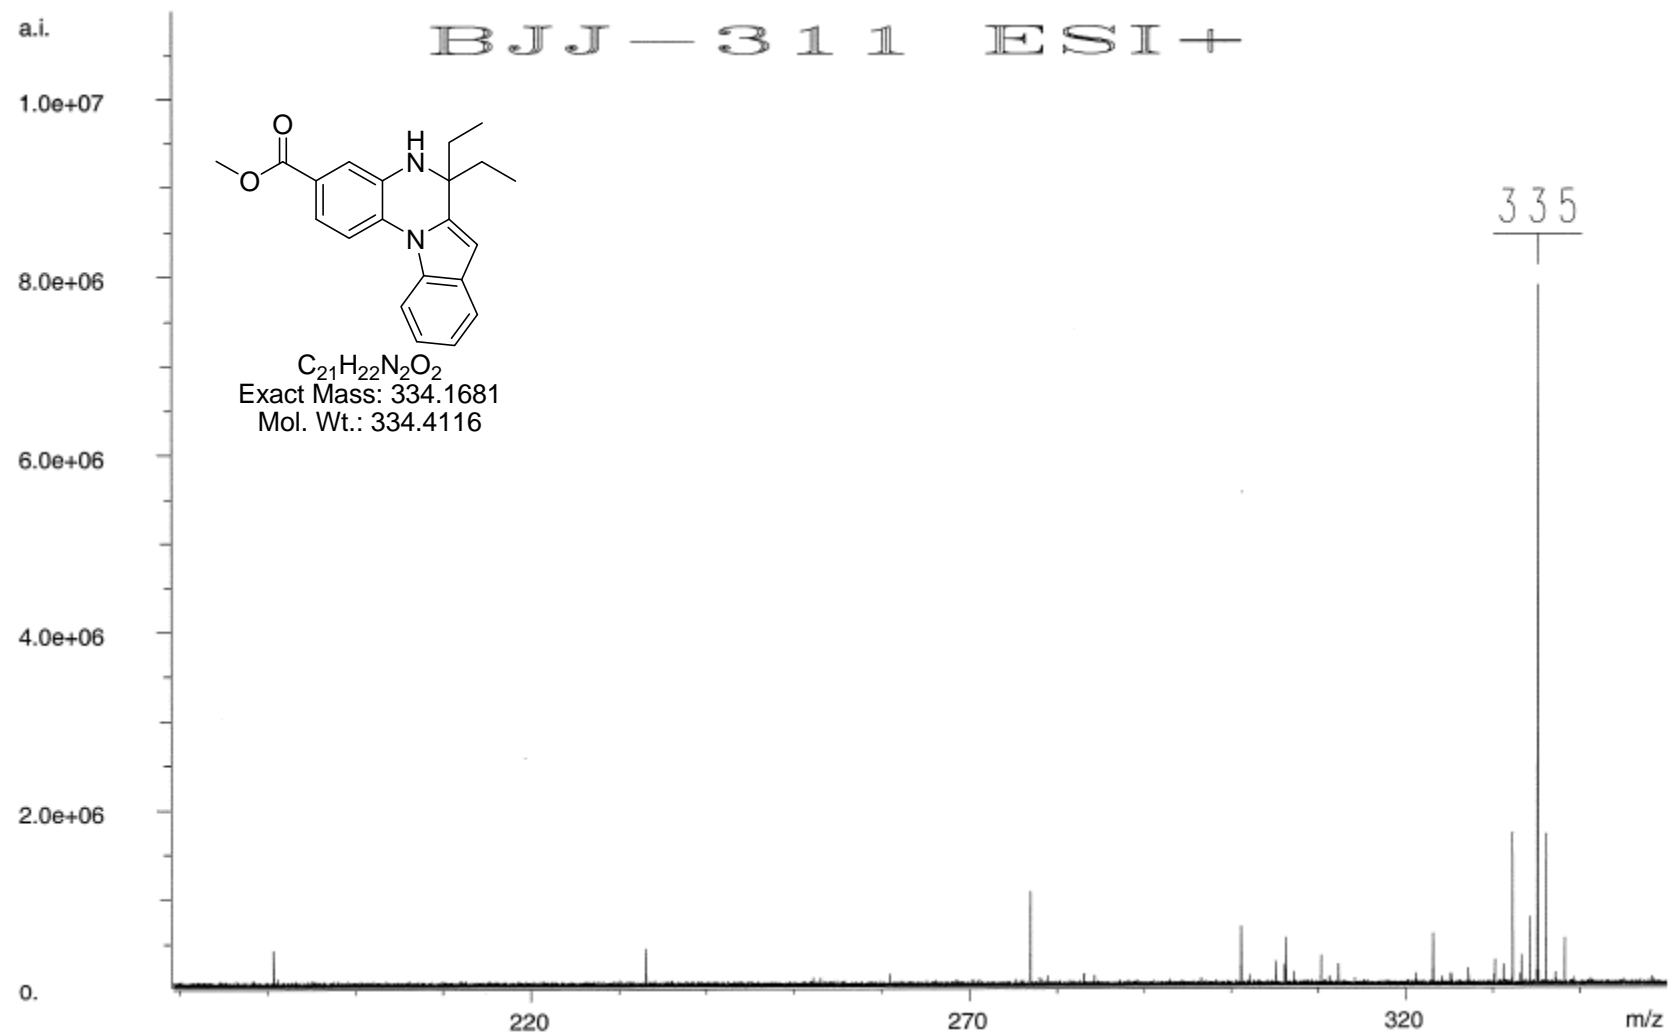

Low Resolution Mass Spectrum (LRMS) of compound **2e**

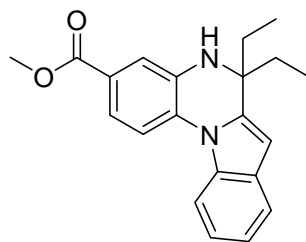

BJJ-311 ESI+

Molecular Formula : C<sub>21</sub>H<sub>23</sub>N<sub>2</sub>O<sub>2</sub>

Exact Mass : 335.1759

Measured Mass : 335.1761

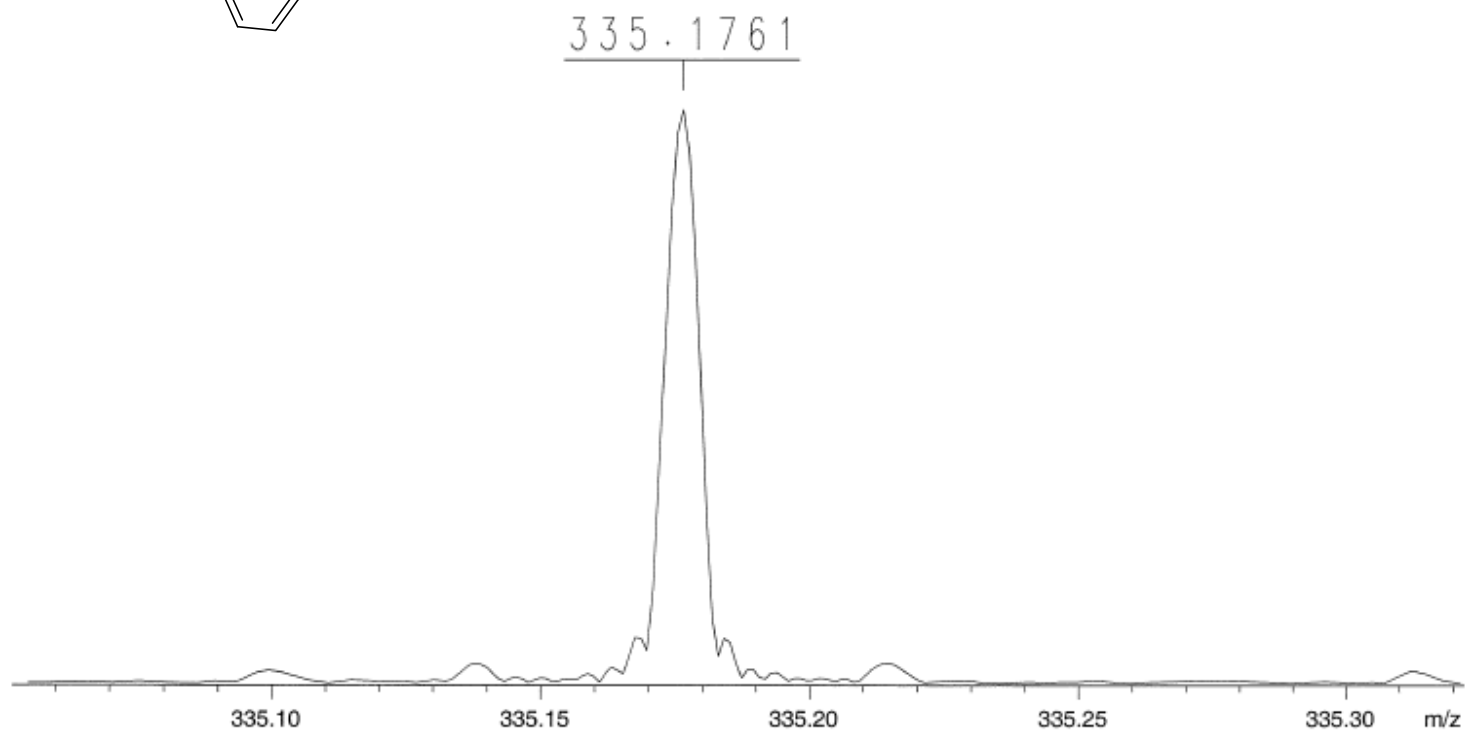

High Resolution Mass Spectrum (HRMS) of compound **2e**

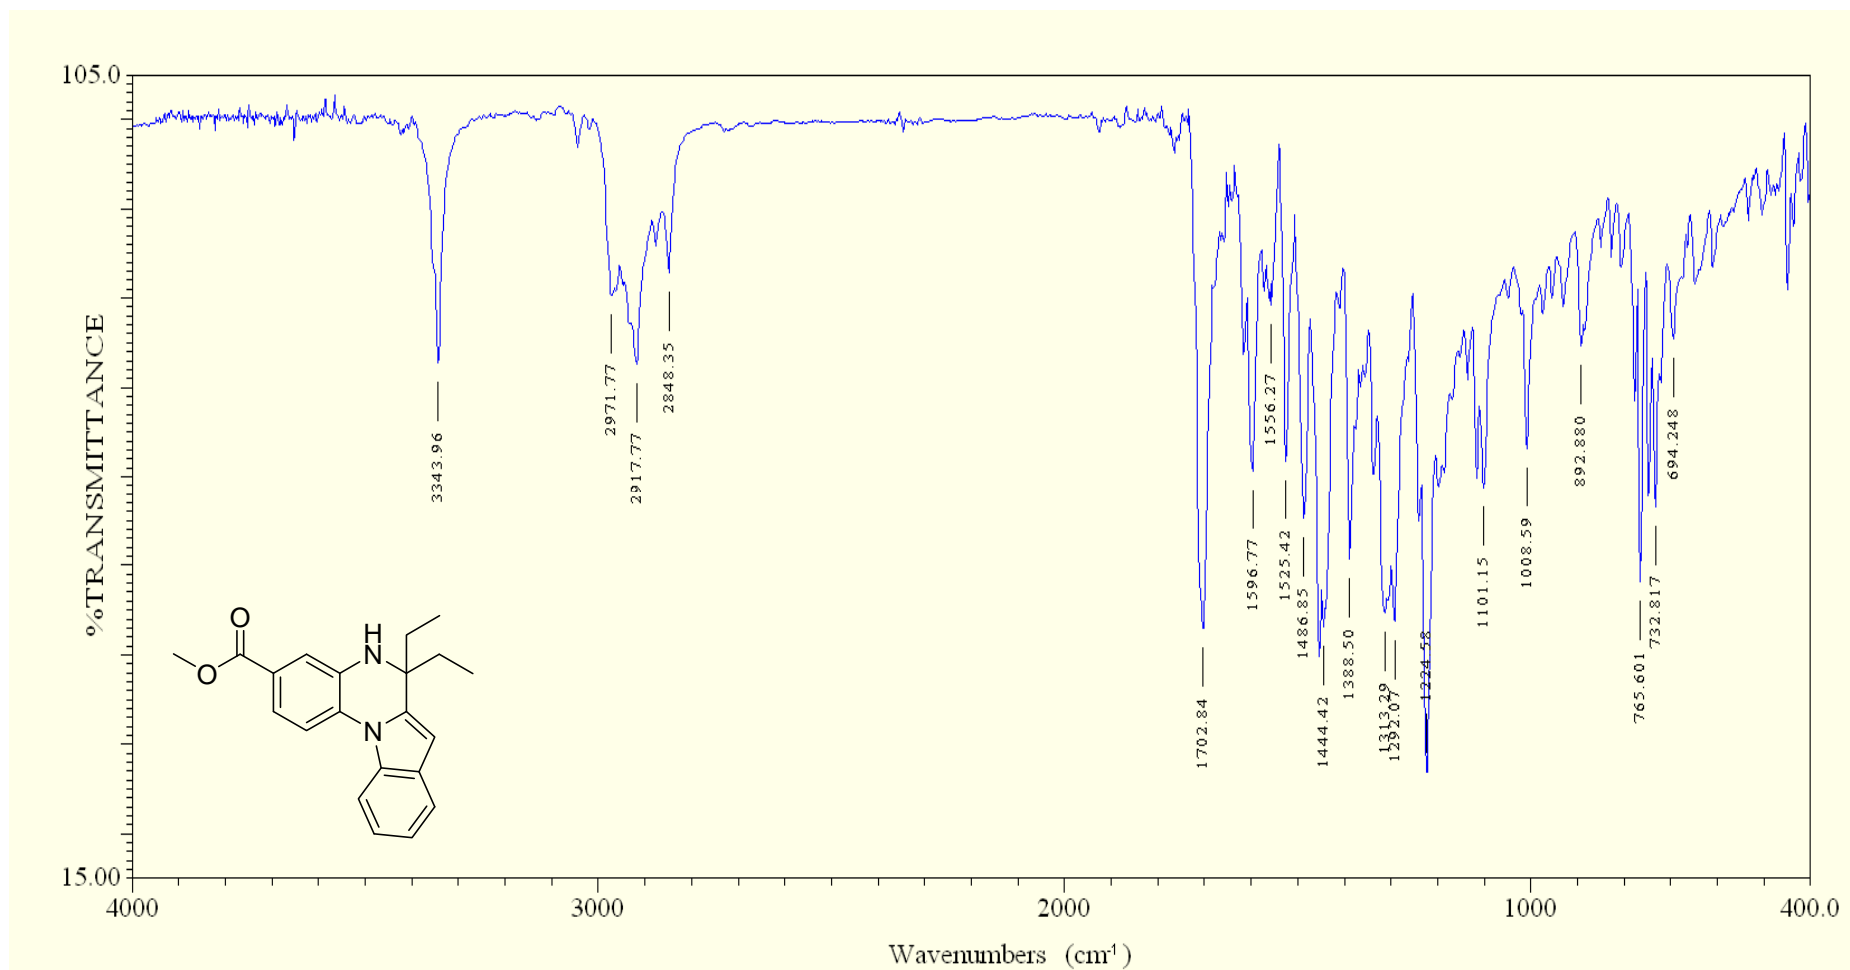

IR Spectrum of compound **2e** (Neat)

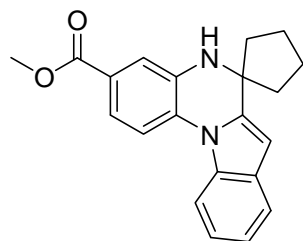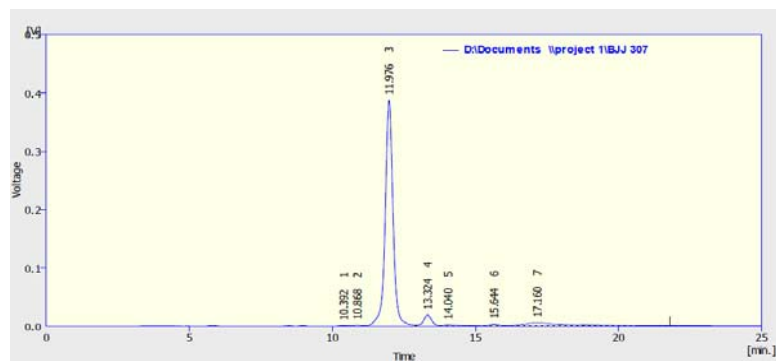

|   | Reten. Time [min] | Area [mV.s] | Height [mV] | Area [%] | Height [%] | W05 [min] |
|---|-------------------|-------------|-------------|----------|------------|-----------|
| 1 | 10.392            | 34.885      | 1.282       | 0.4      | 0.3        | 0.44      |
| 2 | 10.868            | 40.478      | 2.107       | 0.5      | 0.5        | 0.32      |
| 3 | 11.976            | 7460.768    | 387.678     | 85.7     | 92.1       | 0.27      |
| 4 | 13.324            | 394.352     | 19.227      | 4.5      | 4.6        | 0.30      |
| 5 | 14.040            | 93.224      | 2.248       | 1.1      | 0.5        | 0.64      |
| 6 | 15.644            | 82.636      | 3.257       | 0.9      | 0.8        | 0.37      |
| 7 | 17.160            | 601.610     | 5.262       | 6.9      | 1.2        | 1.50      |
|   | Total             | 8707.954    | 421.061     | 100.0    | 100.0      |           |

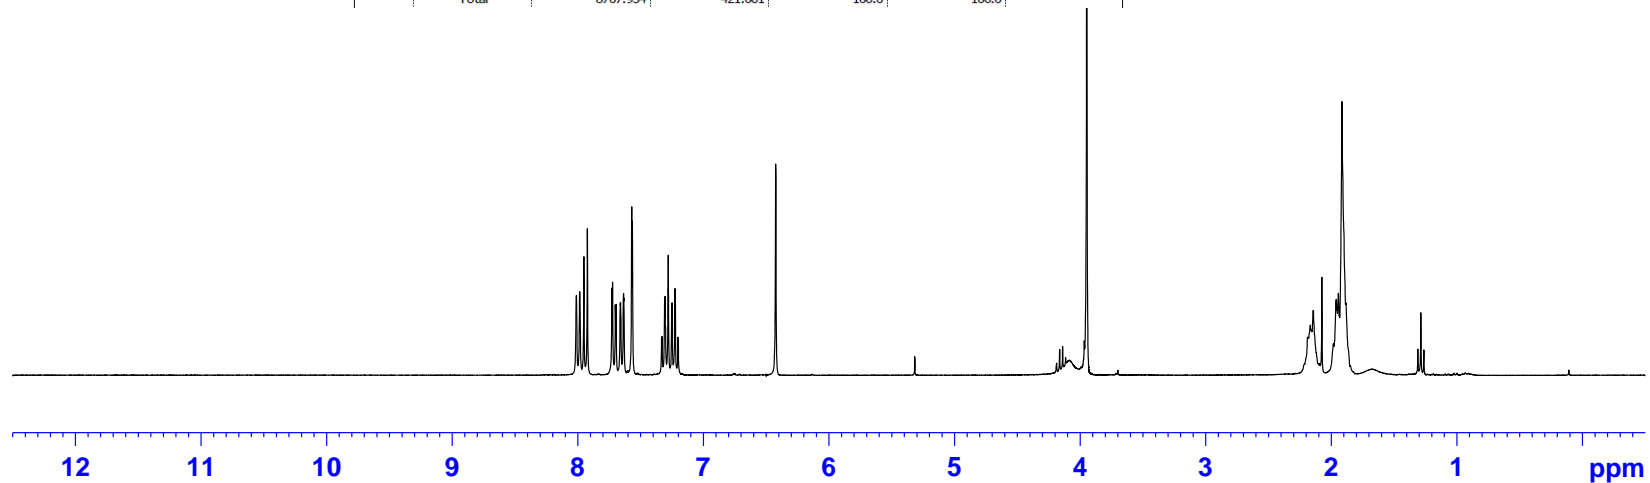

HPLC and  $^1\text{H}$  NMR Spectrum (300 MHz) of compound **2f** in  $\text{CDCl}_3$

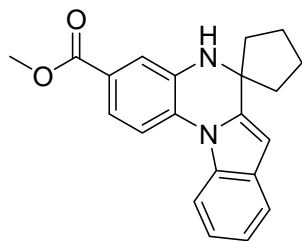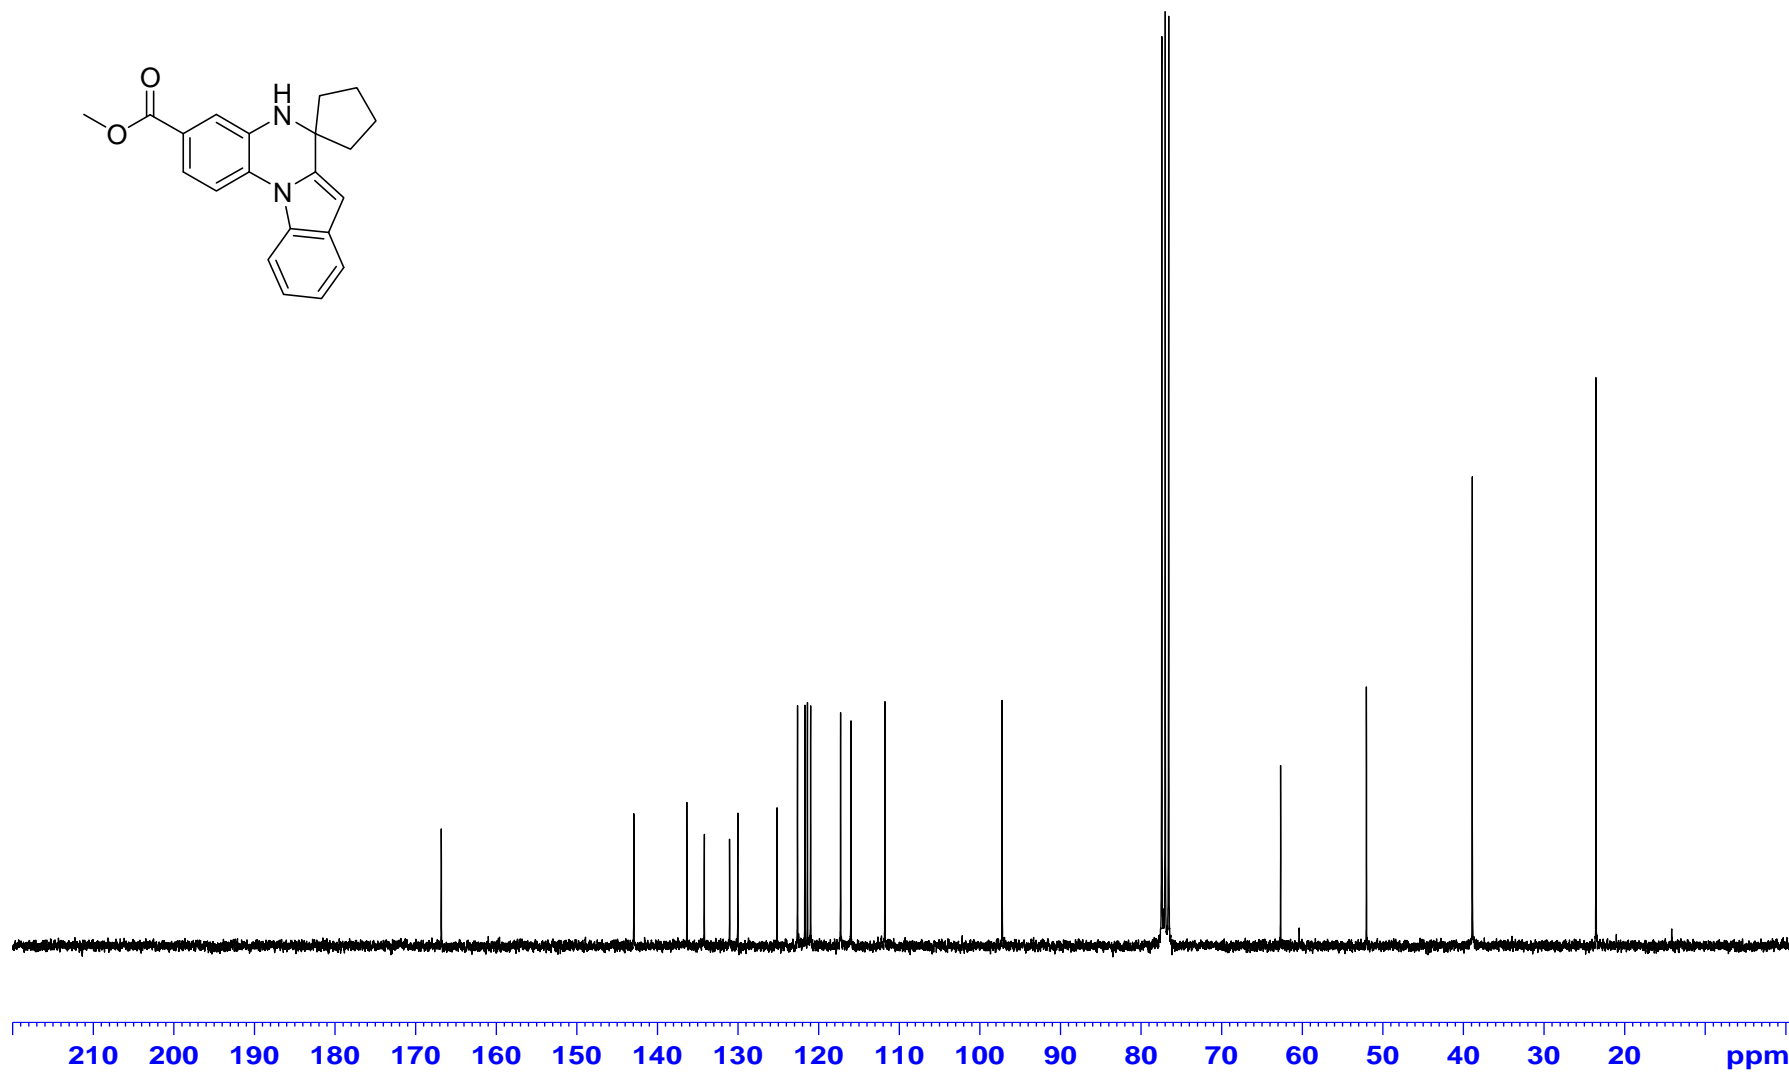

<sup>13</sup>C NMR Spectrum (75 MHz) of compound **2f** in CDCl<sub>3</sub>



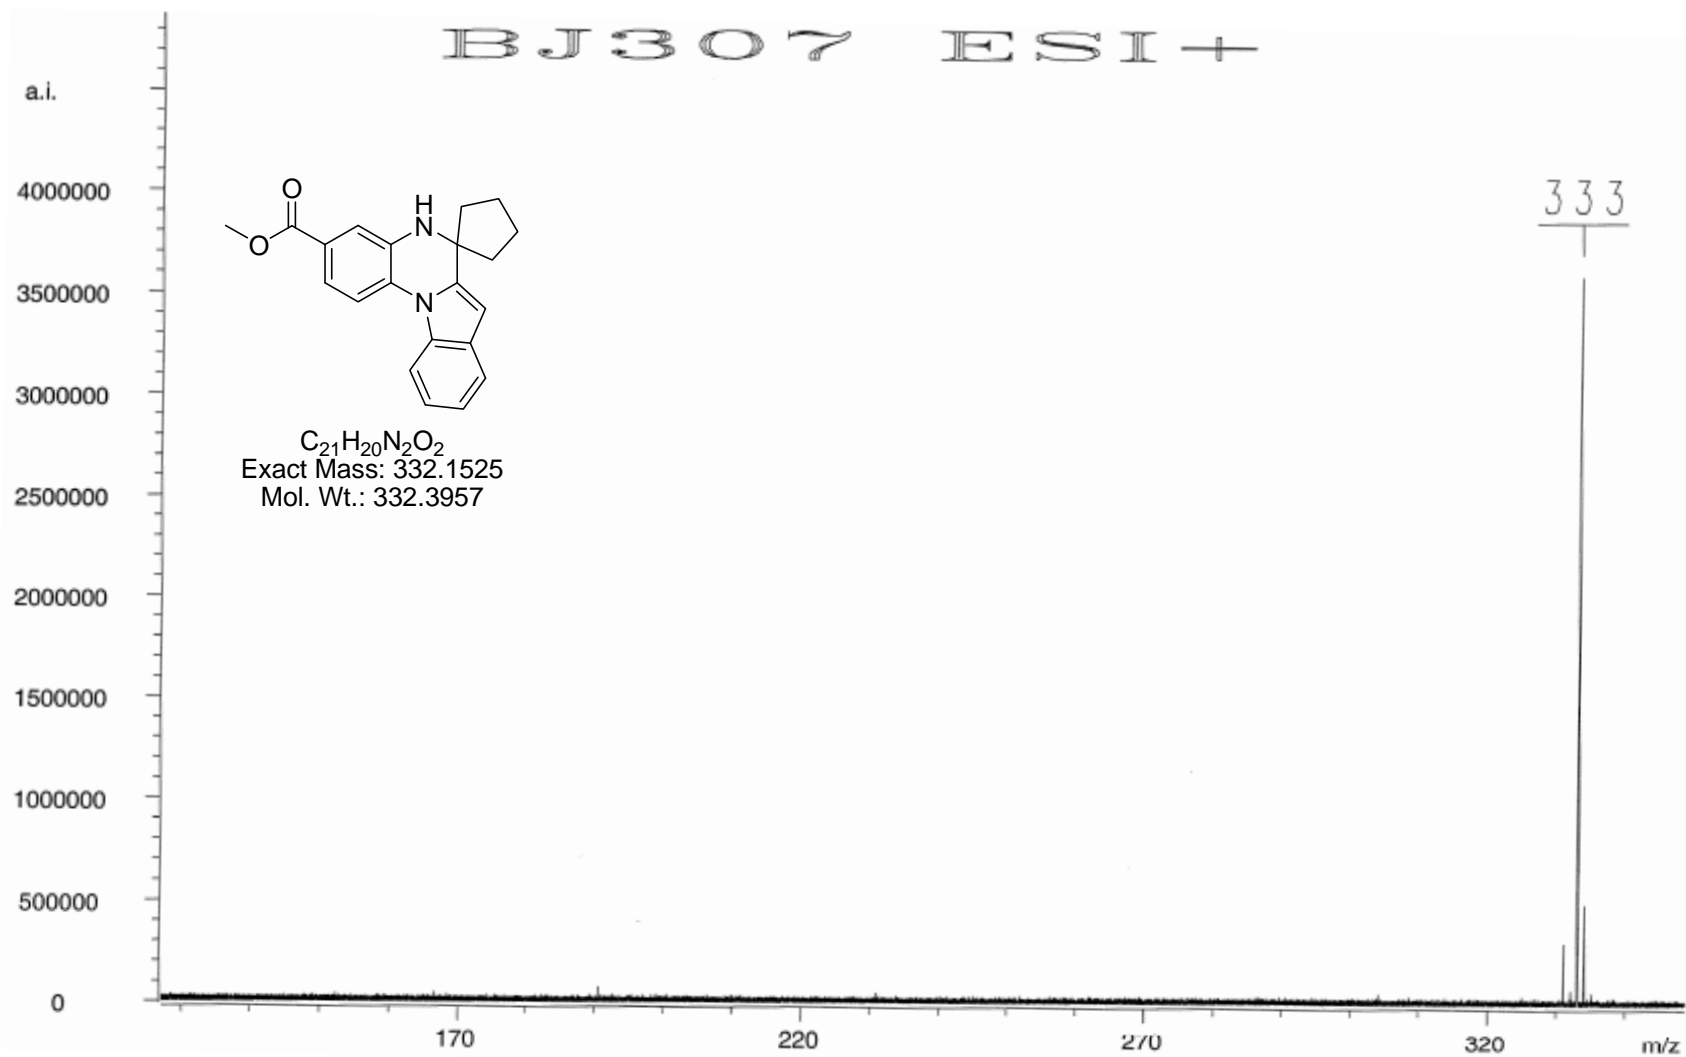

Low Resolution Mass Spectrum (LRMS) of compound **2f**

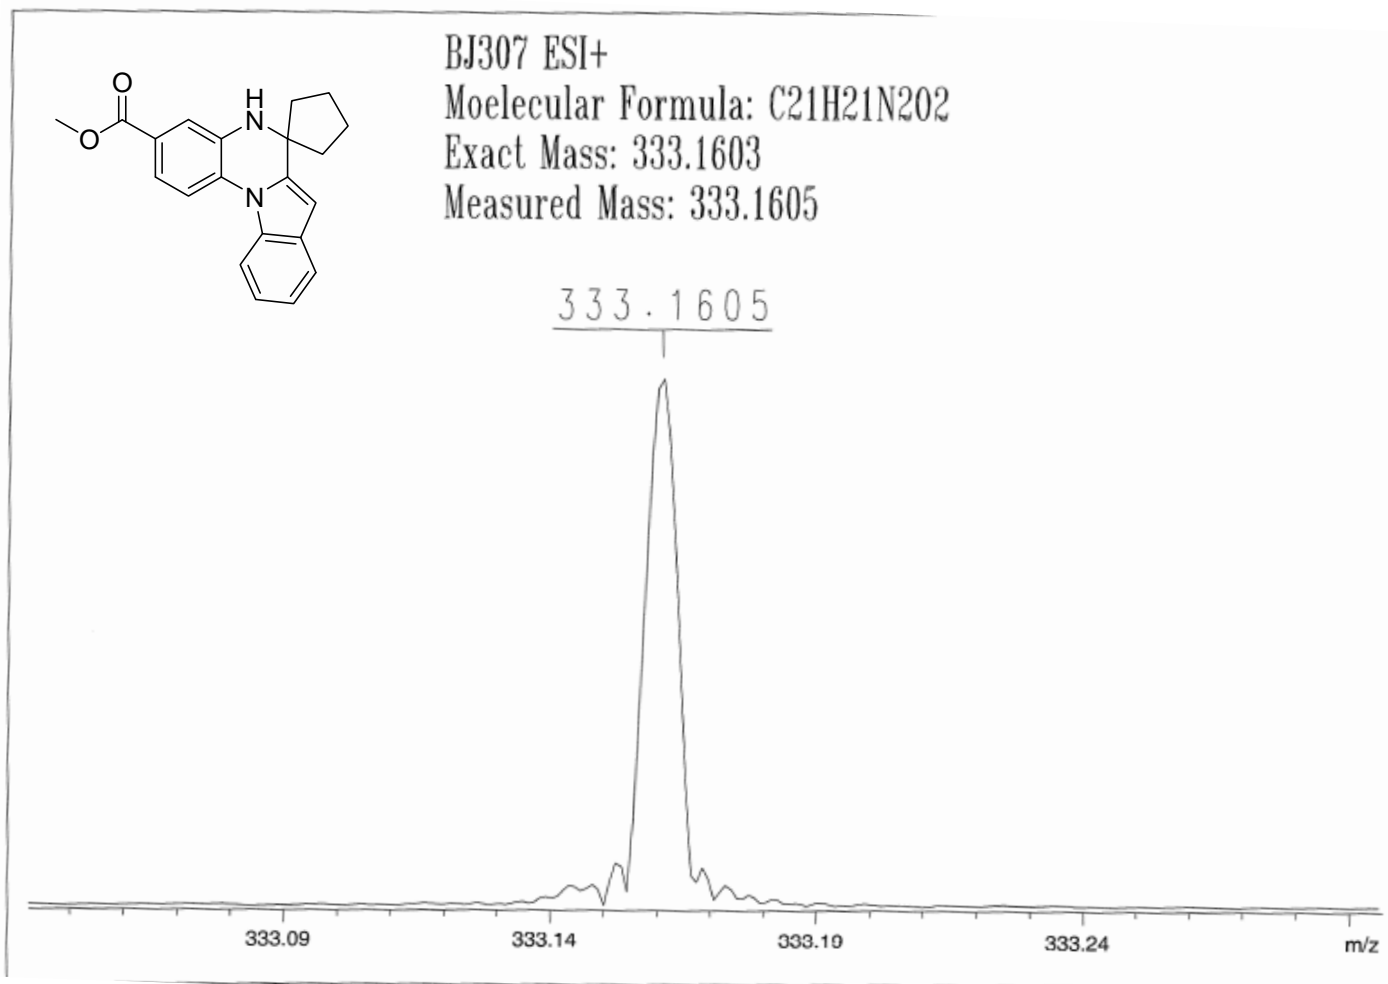

High Resolution Mass Spectrum (HRMS) of compound **2f**

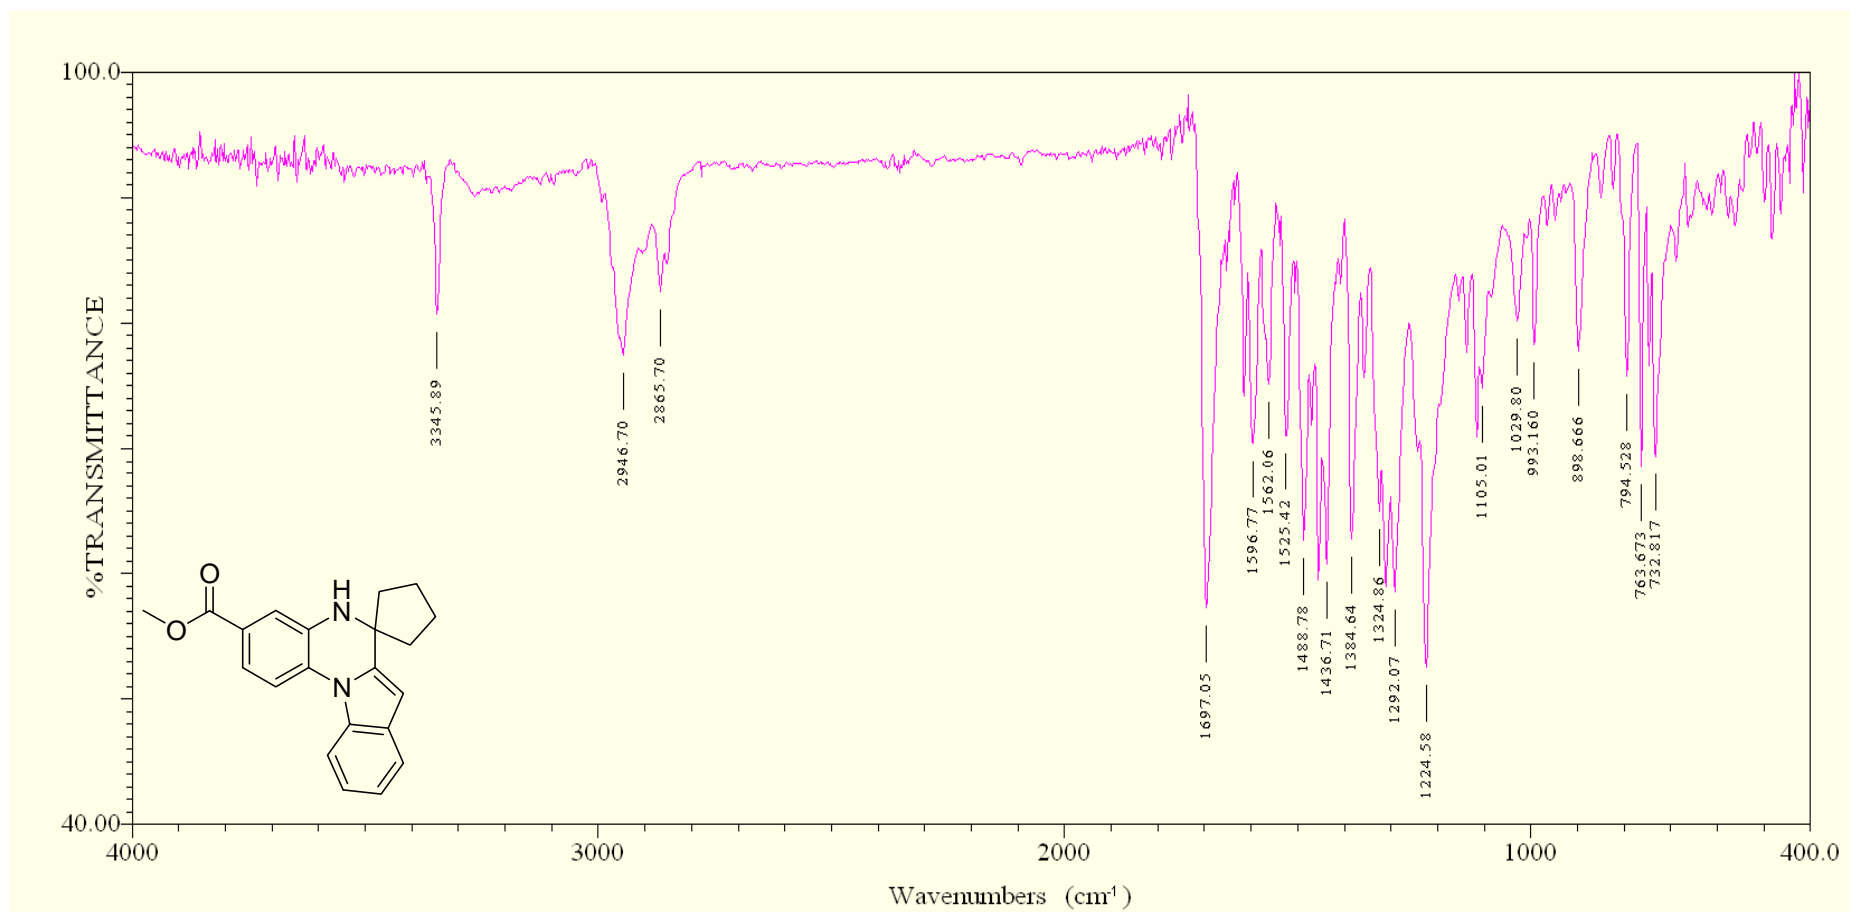

IR Spectrum of compound **2f** (Neat)

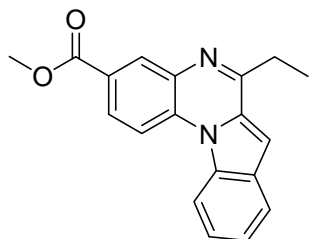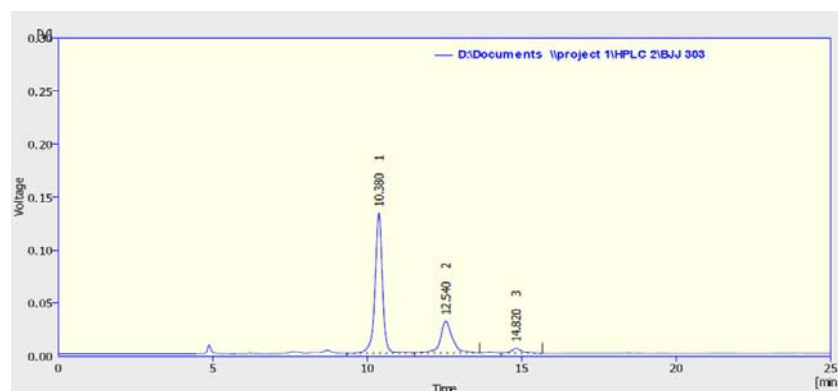

|   | Reten. Time [min] | Area [mV.s] | Height [mV] | Area [%] | Height [%] | W05 [min] |
|---|-------------------|-------------|-------------|----------|------------|-----------|
| 1 | 10.380            | 2215.581    | 132.418     | 70.2     | 79.2       | 0.24      |
| 2 | 12.540            | 831.541     | 30.217      | 26.3     | 18.1       | 0.37      |
| 3 | 14.820            | 110.227     | 4.528       | 3.5      | 2.7        | 0.34      |
|   | Total             | 3157.349    | 167.163     | 100.0    | 100.0      |           |

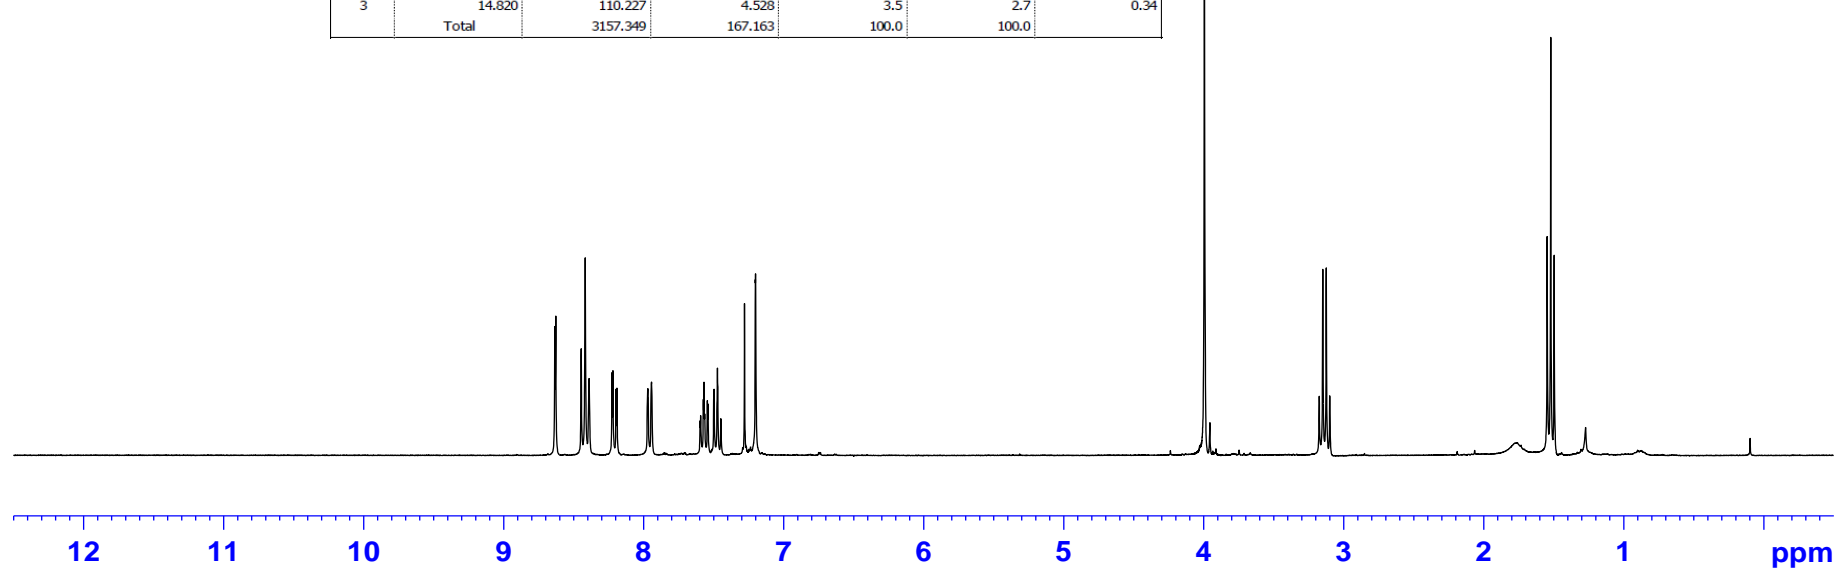

HPLC and  $^1\text{H}$  NMR Spectrum (300 MHz) of compound **3a** in  $\text{CDCl}_3$

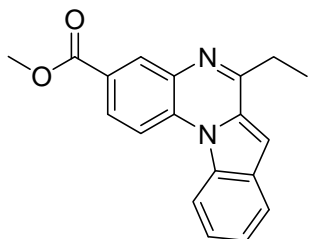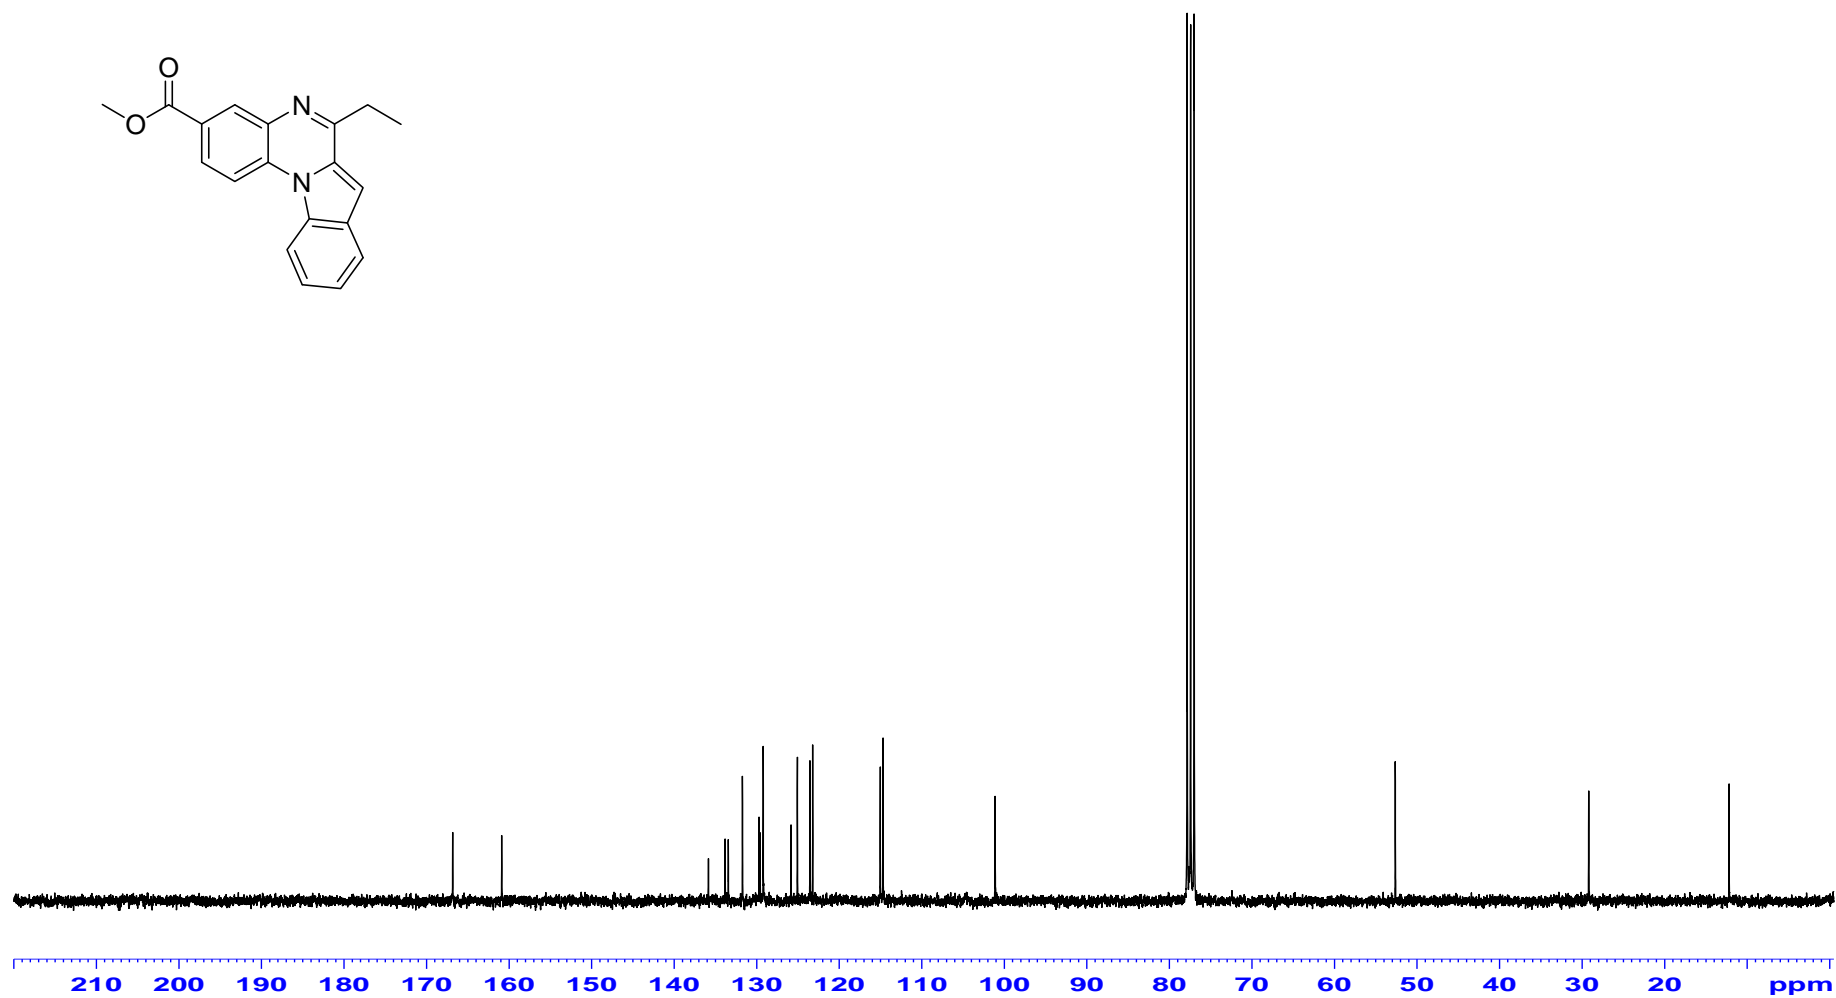

<sup>13</sup>C NMR Spectrum (75 MHz) of compound **3a** in CDCl<sub>3</sub>

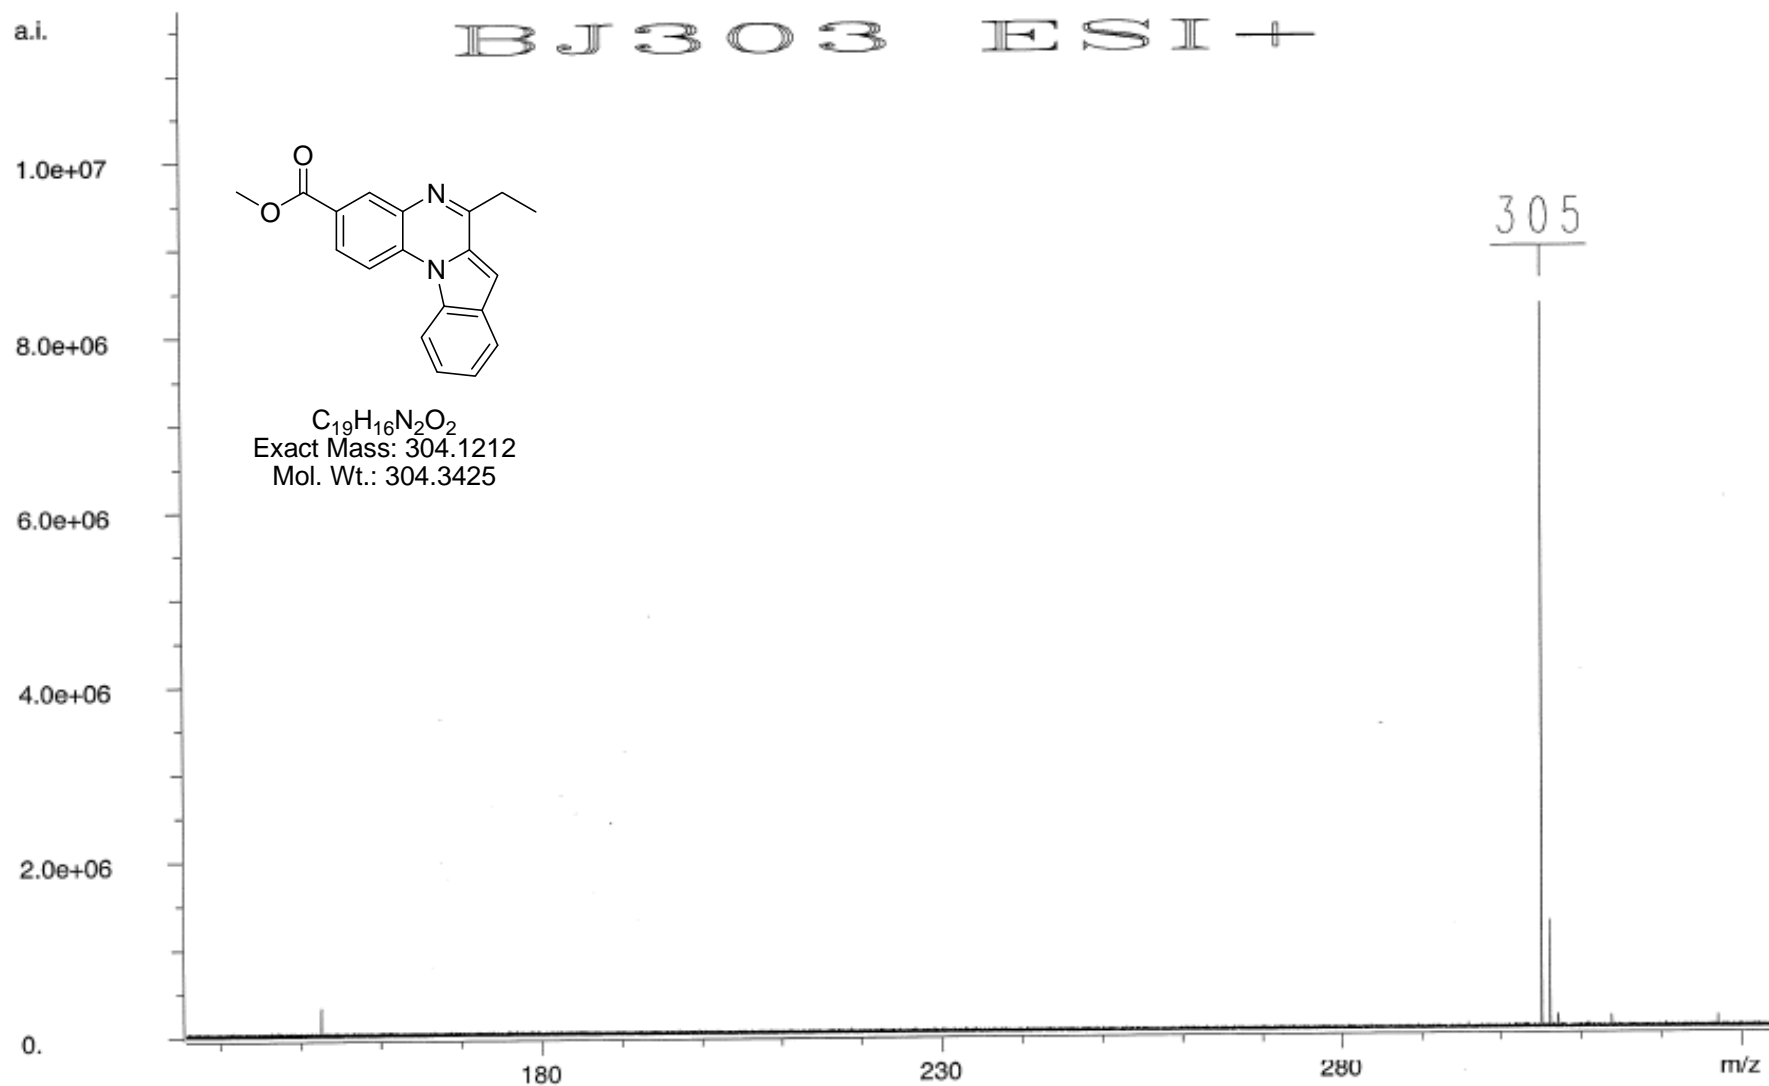

Low Resolution Mass Spectrum (LRMS) of compound **3a**

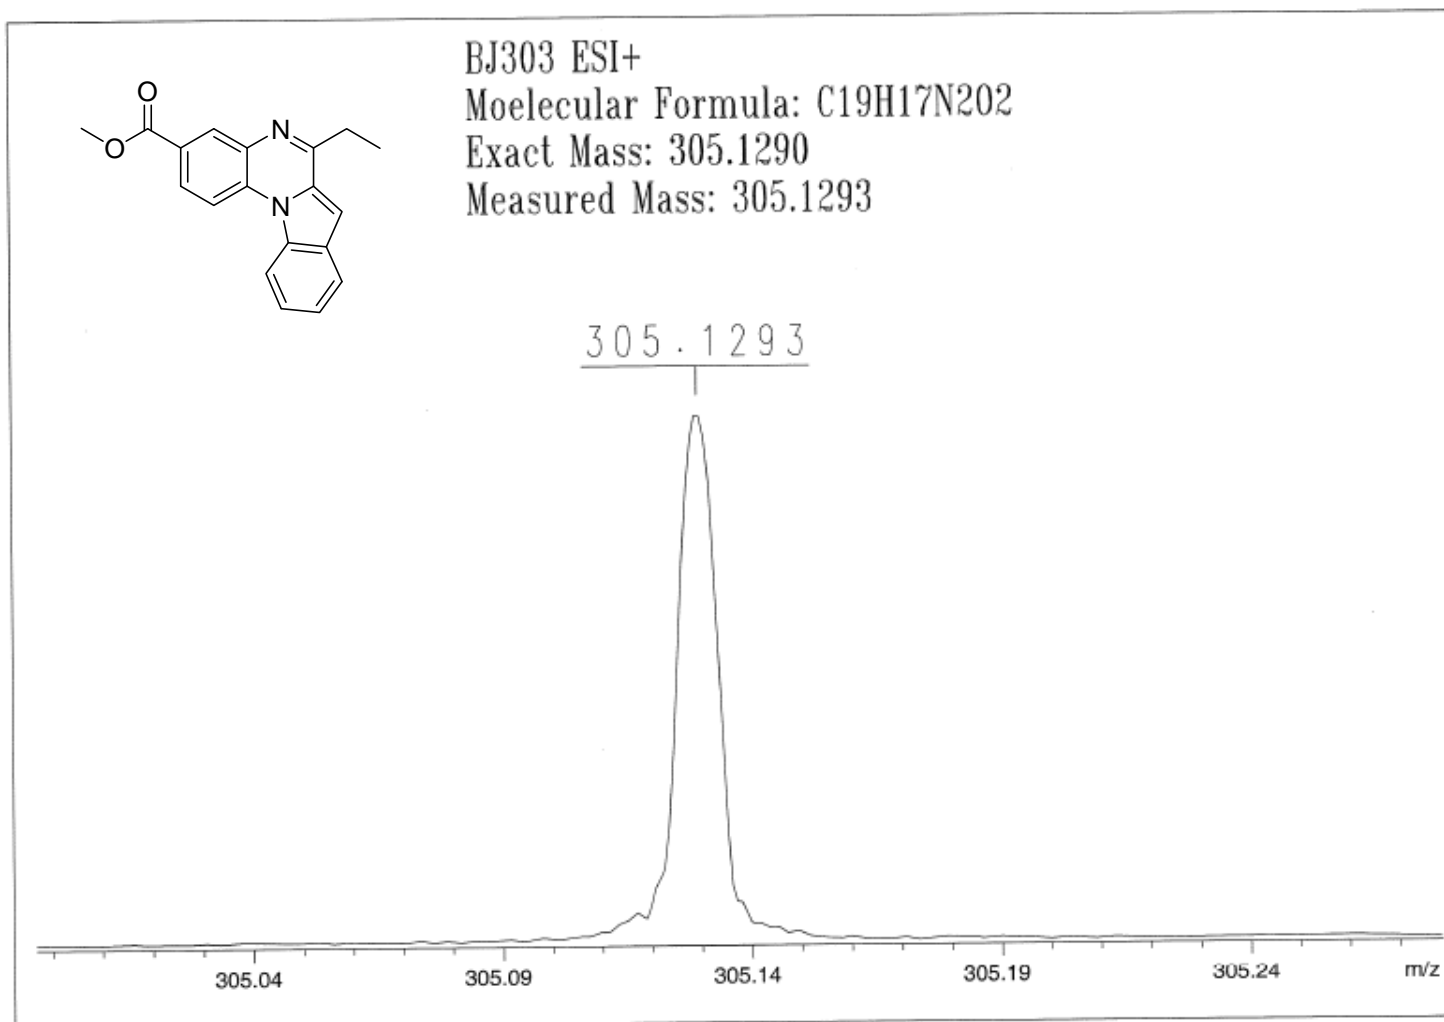

High Resolution Mass Spectrum (HRMS) of compound **3a**

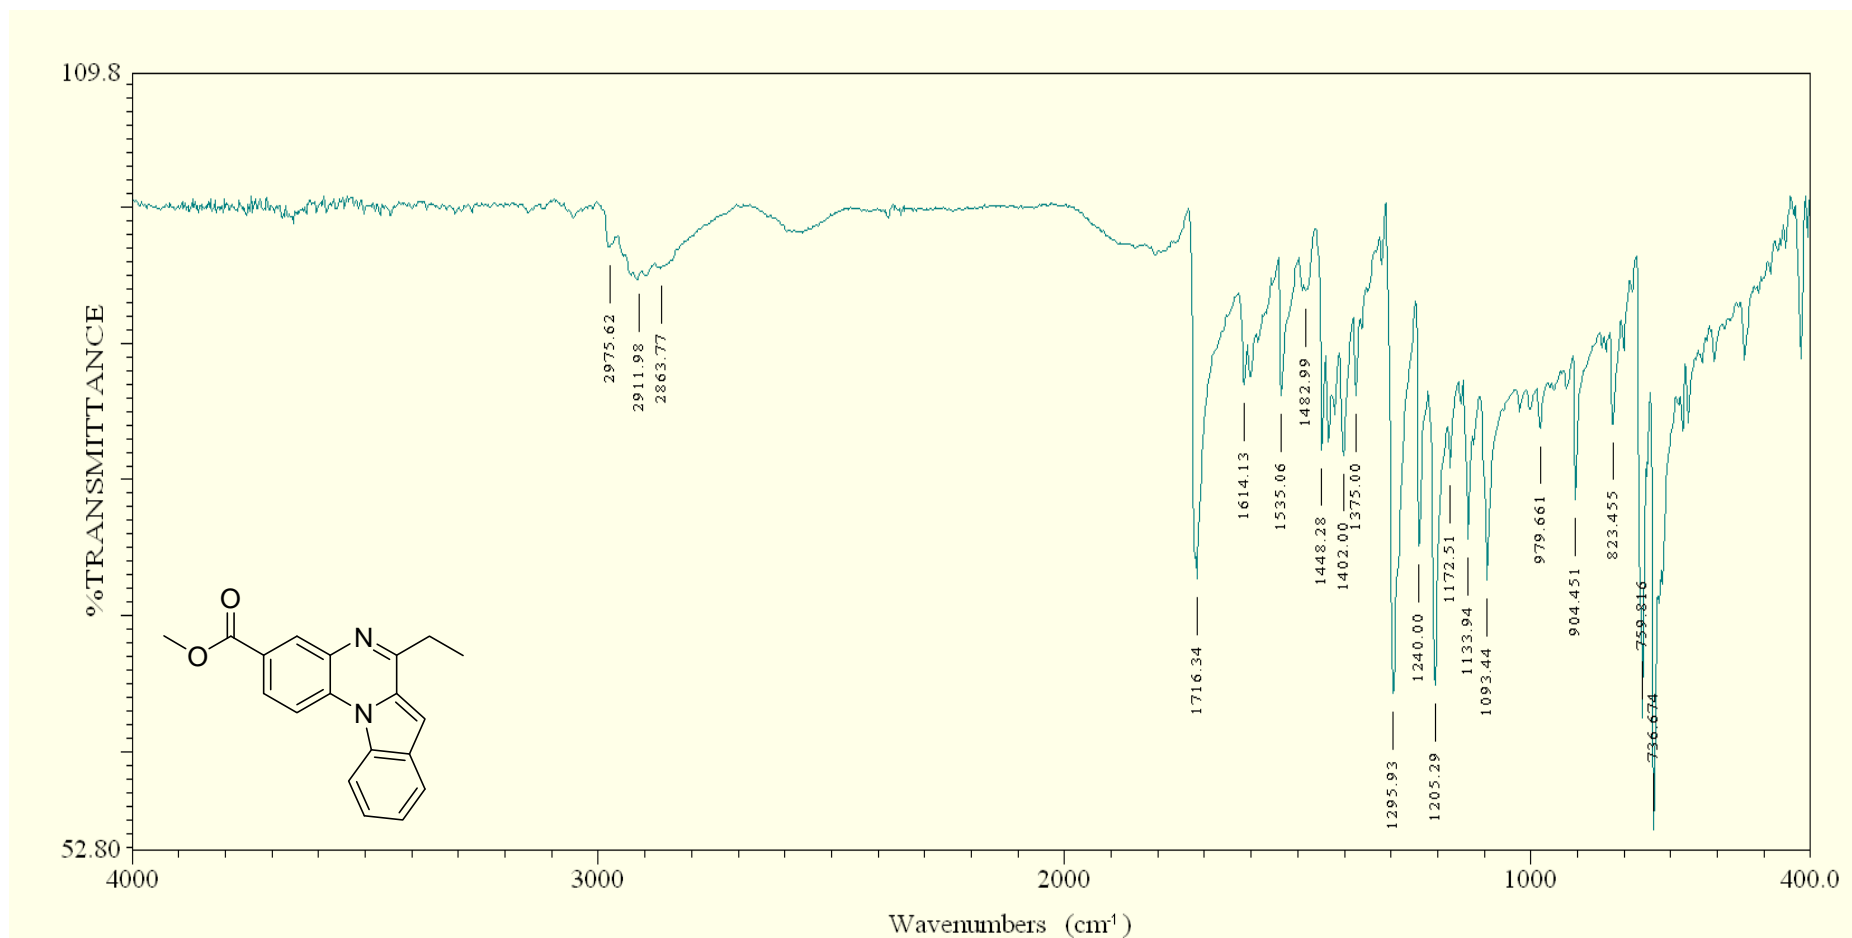

IR Spectrum of compound **3a** (Neat)



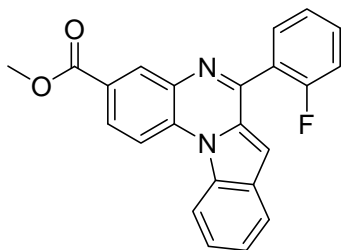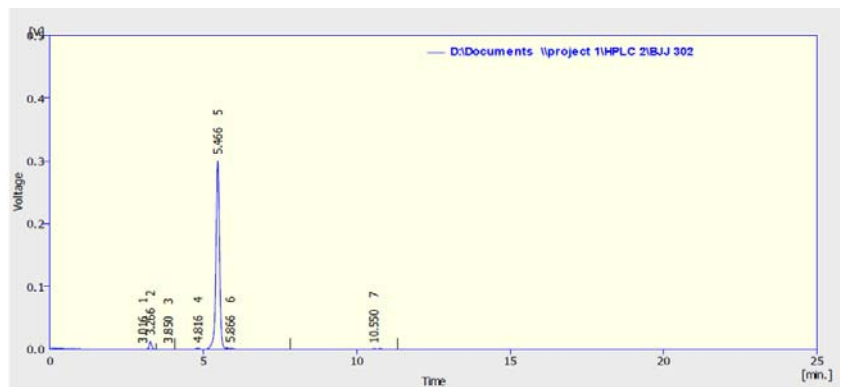

|   | Reten. Time [min] | Area [mV.s] | Height [mV] | Area [%] | Height [%] | W05 [min] |
|---|-------------------|-------------|-------------|----------|------------|-----------|
| 1 | 6.032             | 20.295      | 1.352       | 0.4      | 0.4        | 0.28      |
| 2 | 6.532             | 335.459     | 17.056      | 6.0      | 5.2        | 0.21      |
| 3 | 7.700             | 223.148     | 3.466       | 4.0      | 1.1        | 0.98      |
| 4 | 9.632             | 25.530      | 1.463       | 0.5      | 0.4        | 0.23      |
| 5 | 10.932            | 4893.142    | 300.932     | 87.8     | 92.3       | 0.24      |
| 6 | 11.732            | 58.911      | 1.493       | 1.1      | 0.5        | 0.37      |
| 7 | 21.100            | 16.927      | 0.261       | 0.3      | 0.1        | 1.01      |
|   | Total             | 5573.413    | 326.024     | 100.0    | 100.0      |           |

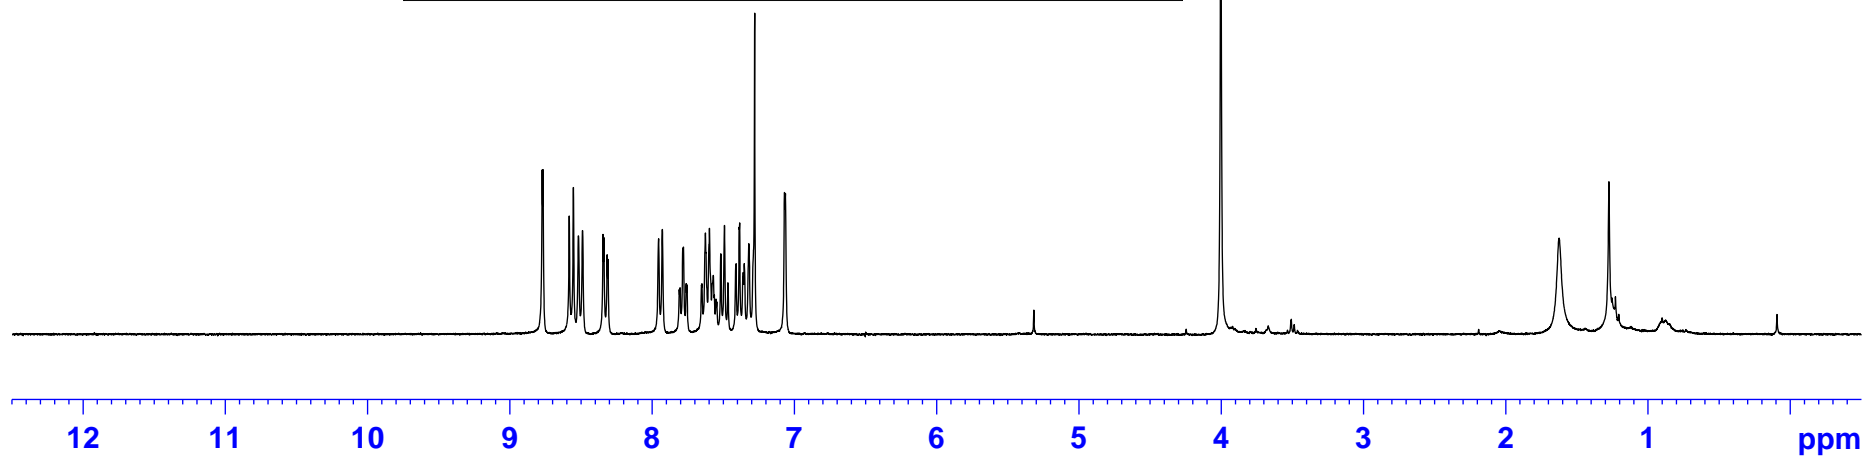

HPLC and  $^1\text{H}$  NMR Spectrum (300 MHz) of compound **3b** in  $\text{CDCl}_3$

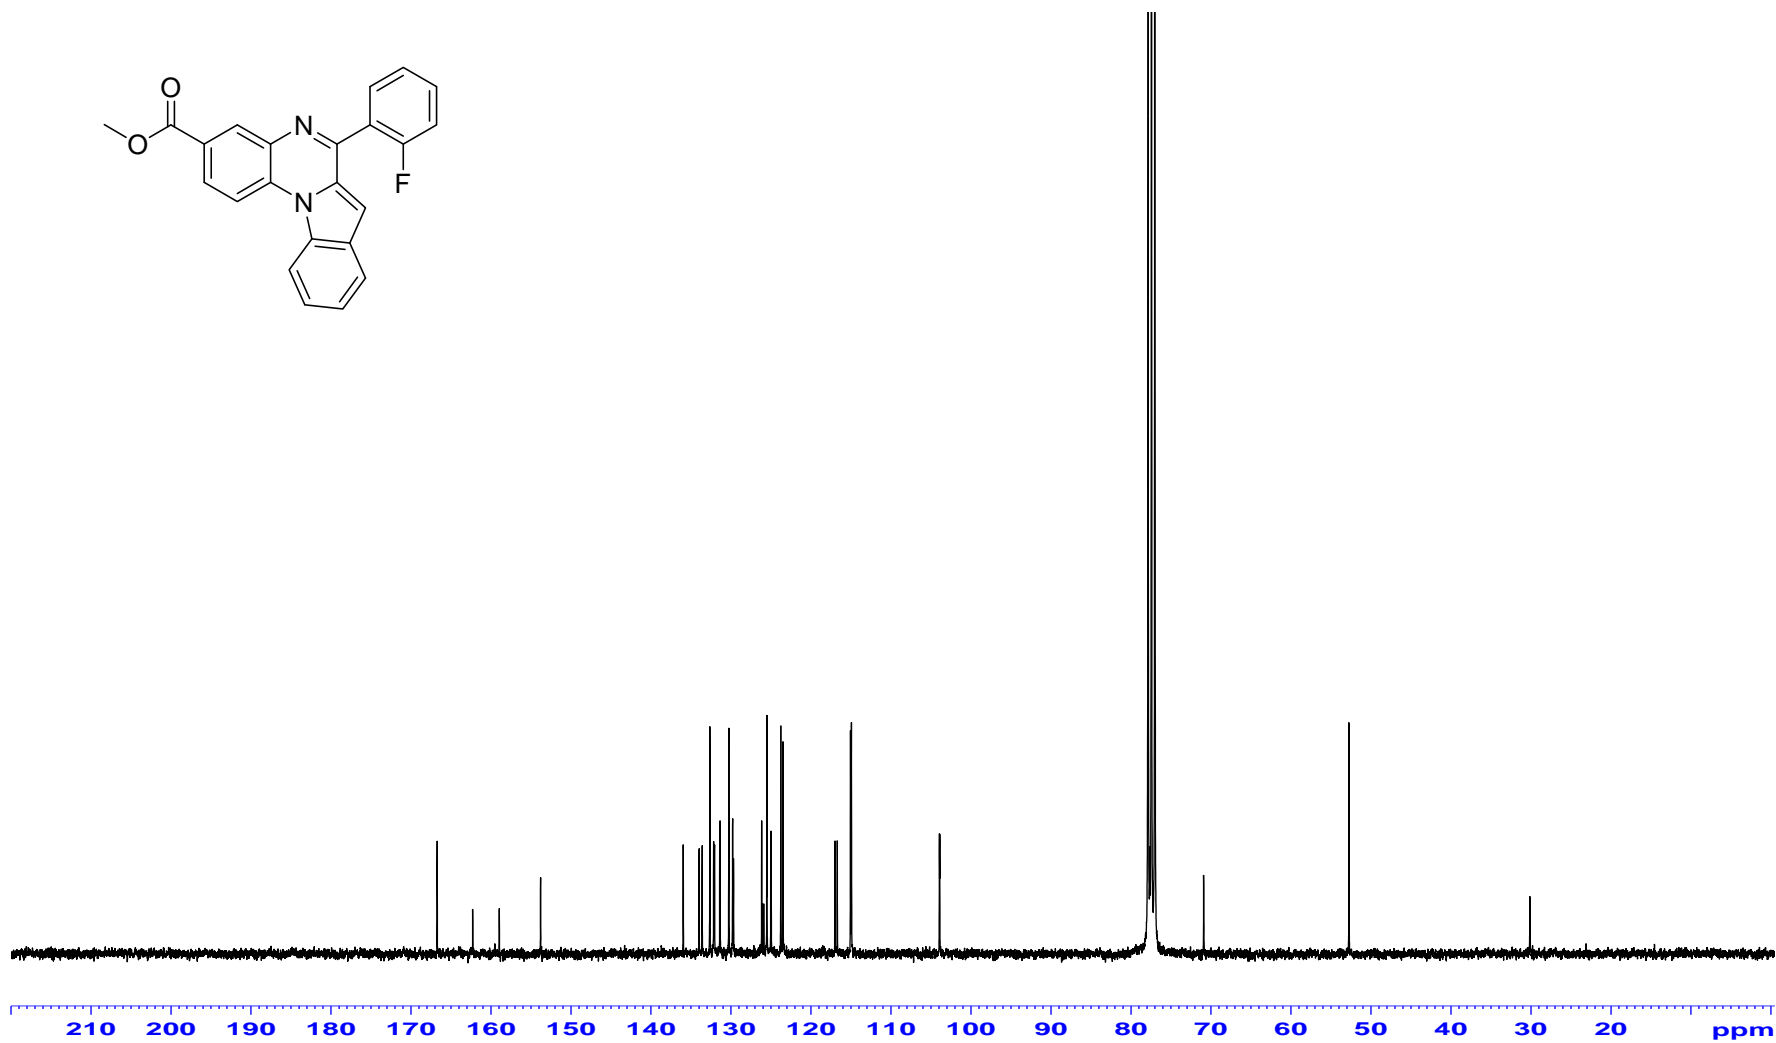

<sup>13</sup>C NMR Spectrum (75 MHz) of compound **3b** in CDCl<sub>3</sub>

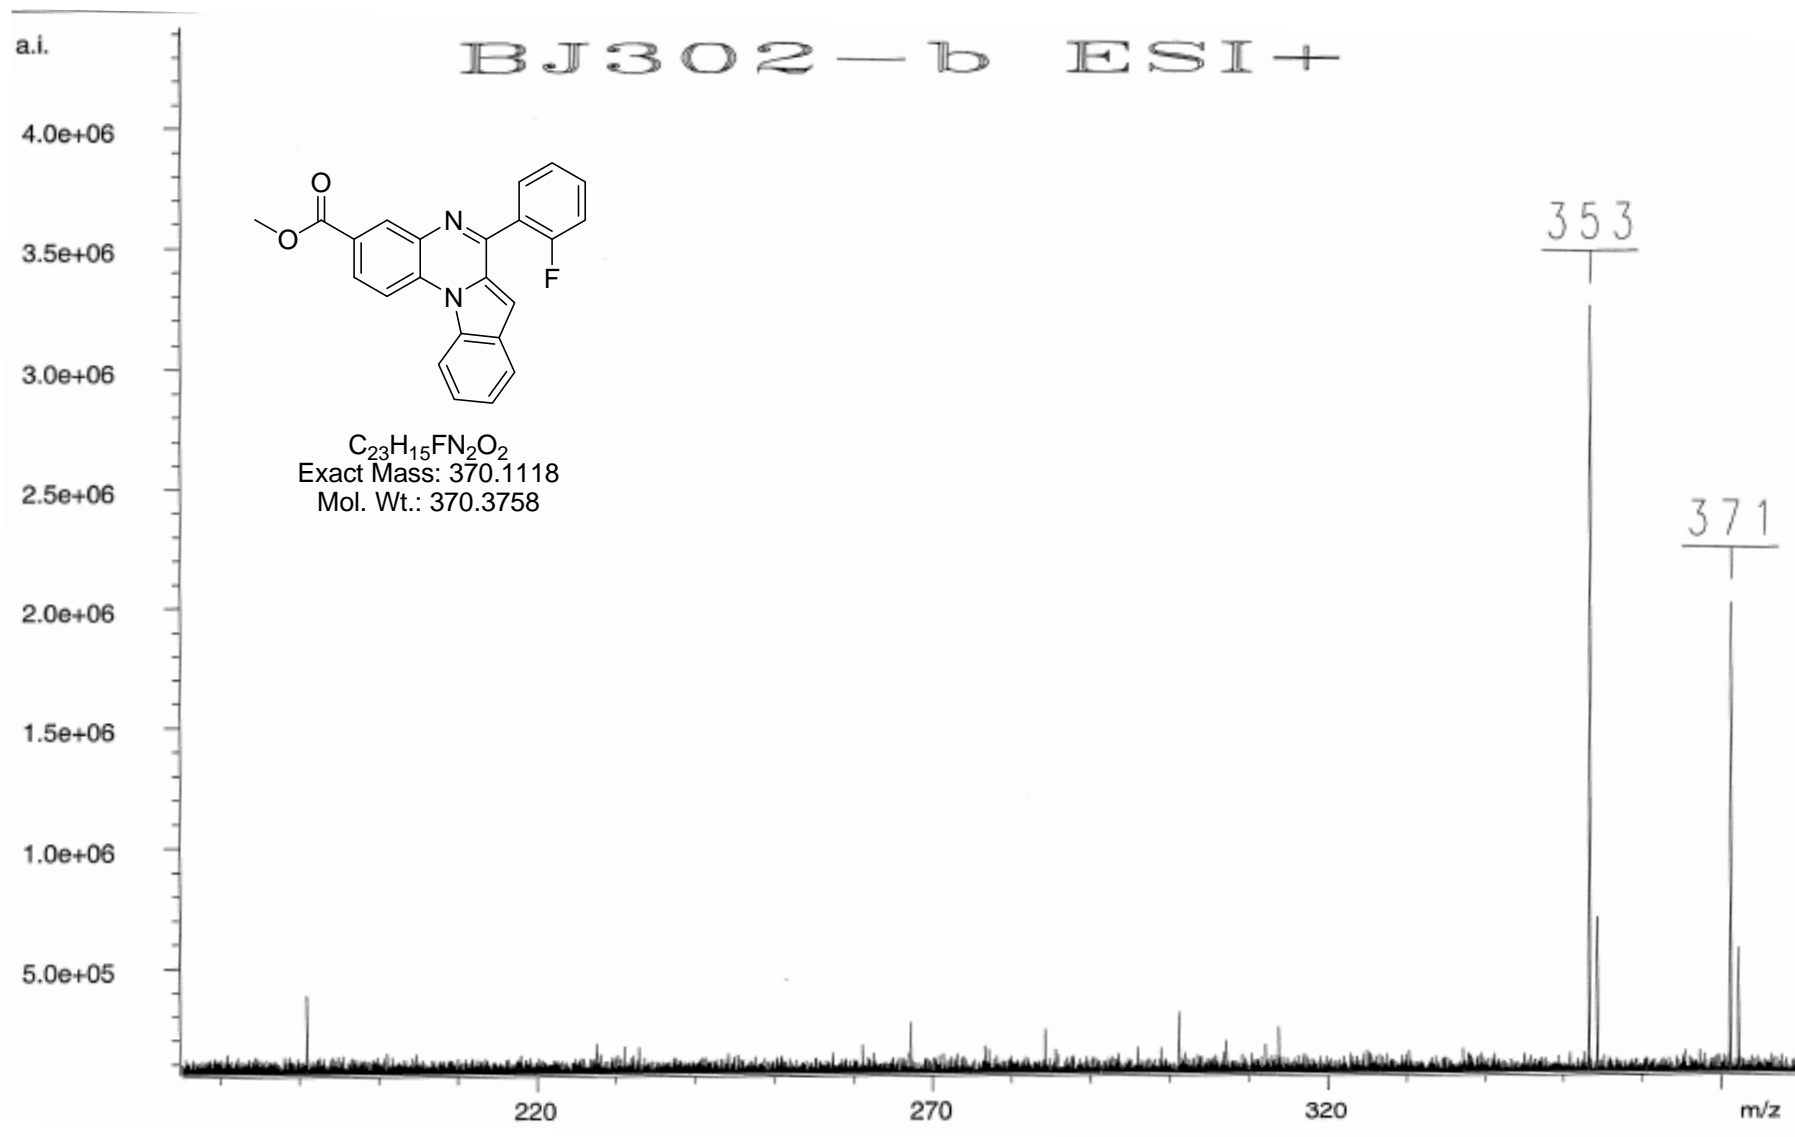

Low Resolution Mass Spectrum (LRMS) of compound **3b**

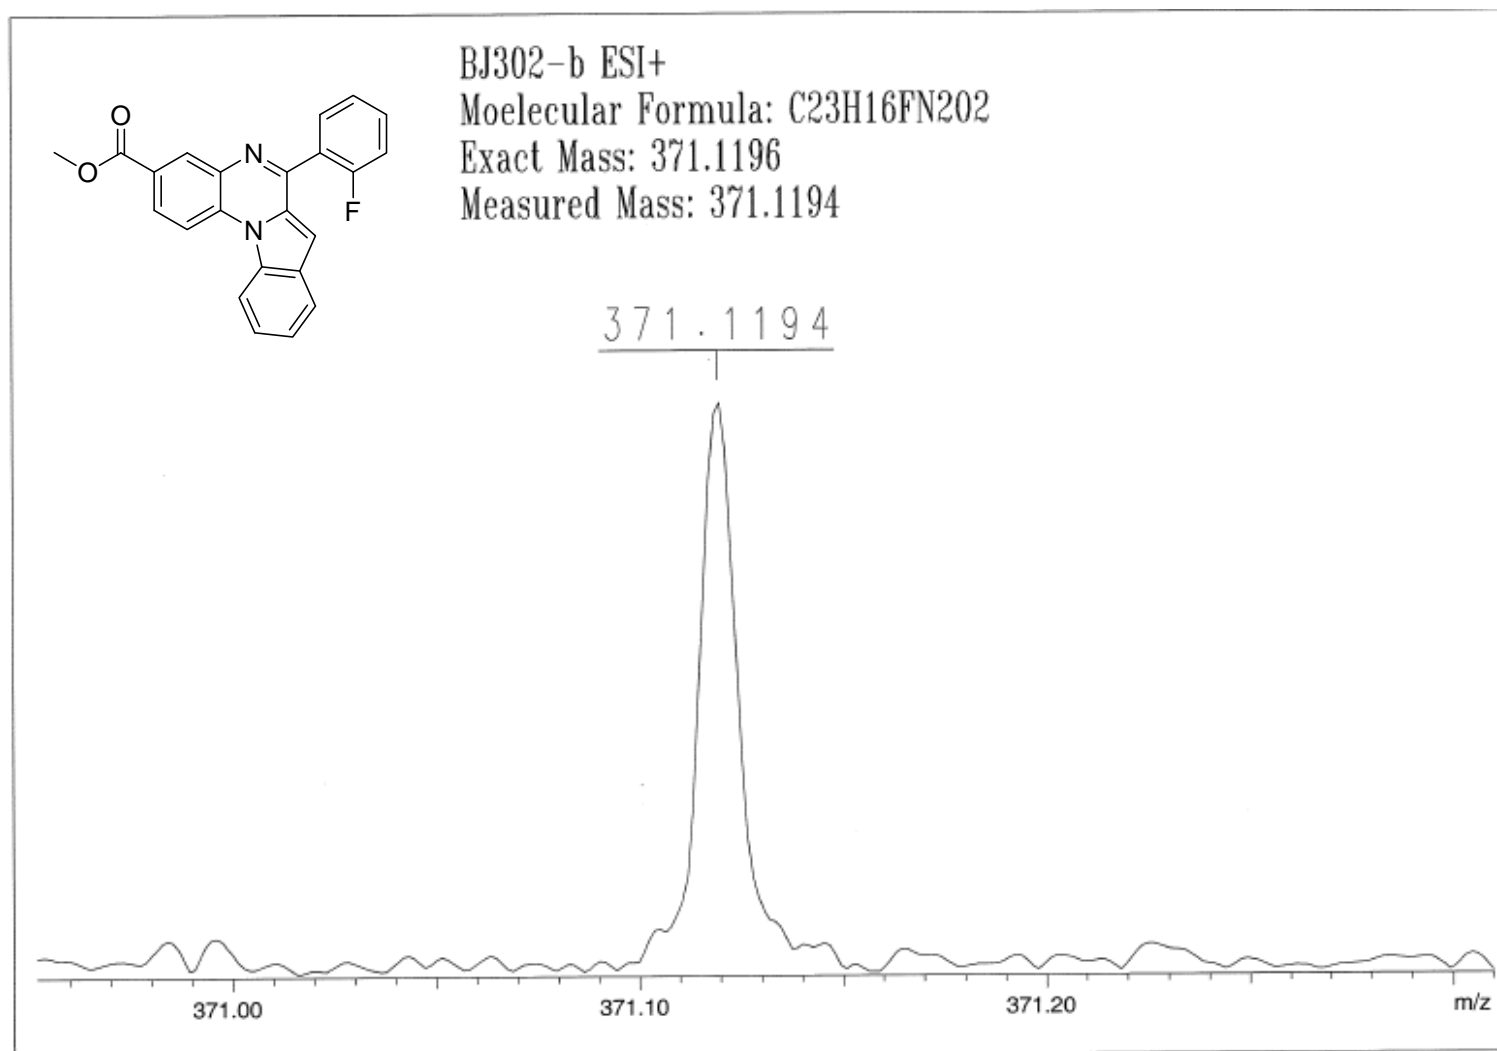

High Resolution Mass Spectrum (HRMS) of compound **3b**

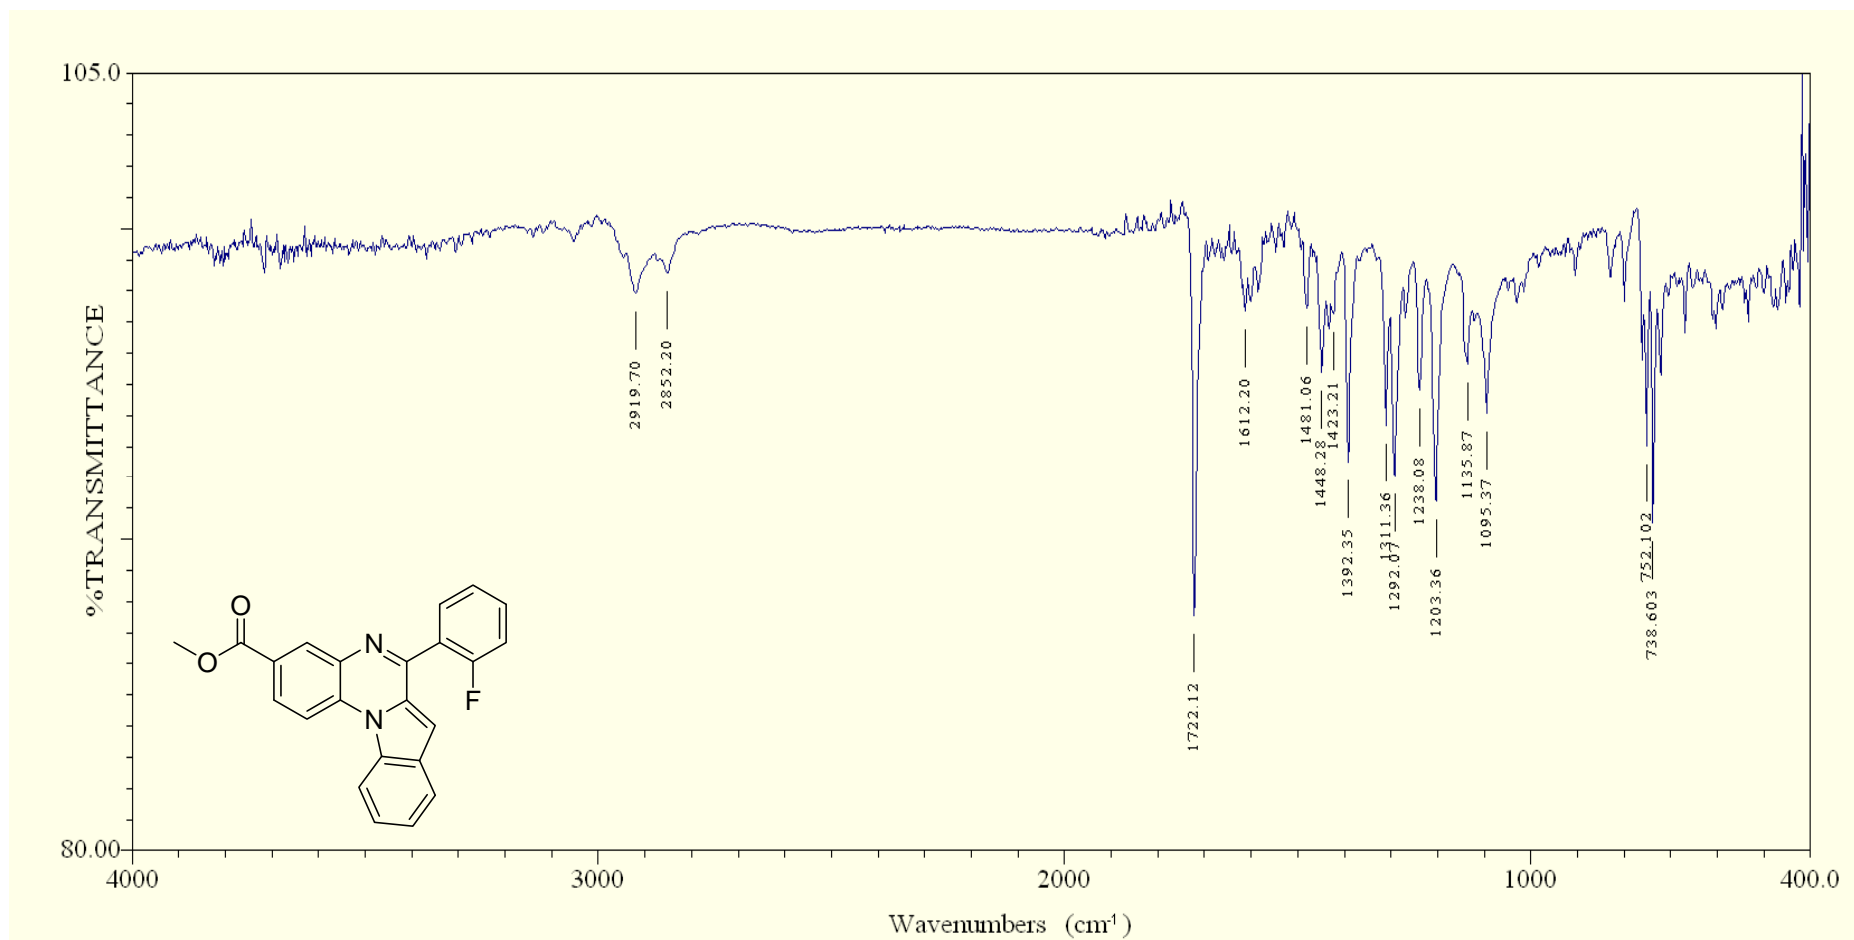

IR Spectrum of compound **3b** (Neat)

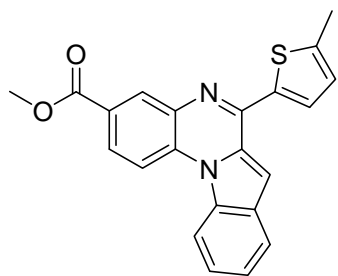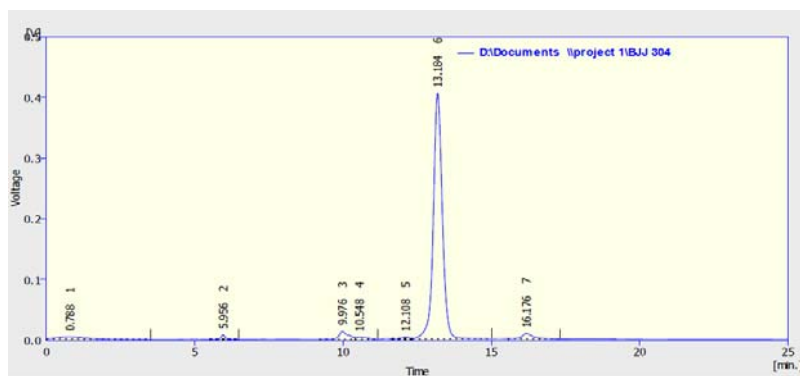

|   | Reten. Time [min] | Area [mV.s] | Height [mV] | Area [%] | Height [%] | W05 [min] |
|---|-------------------|-------------|-------------|----------|------------|-----------|
| 1 | 0.788             | 227.838     | 3.618       | 2.4      | 0.8        | 0.95      |
| 2 | 5.956             | 71.667      | 7.678       | 0.8      | 1.7        | 0.14      |
| 3 | 9.976             | 281.200     | 13.194      | 3.0      | 3.0        | 0.35      |
| 4 | 10.548            | 91.675      | 3.704       | 1.0      | 0.8        | 0.47      |
| 5 | 12.108            | 51.149      | 2.971       | 0.5      | 0.7        | 0.26      |
| 6 | 13.184            | 8524.755    | 404.894     | 90.0     | 91.0       | 0.31      |
| 7 | 16.176            | 221.562     | 8.716       | 2.3      | 2.0        | 0.34      |
|   | Total             | 9469.845    | 444.776     | 100.0    | 100.0      |           |

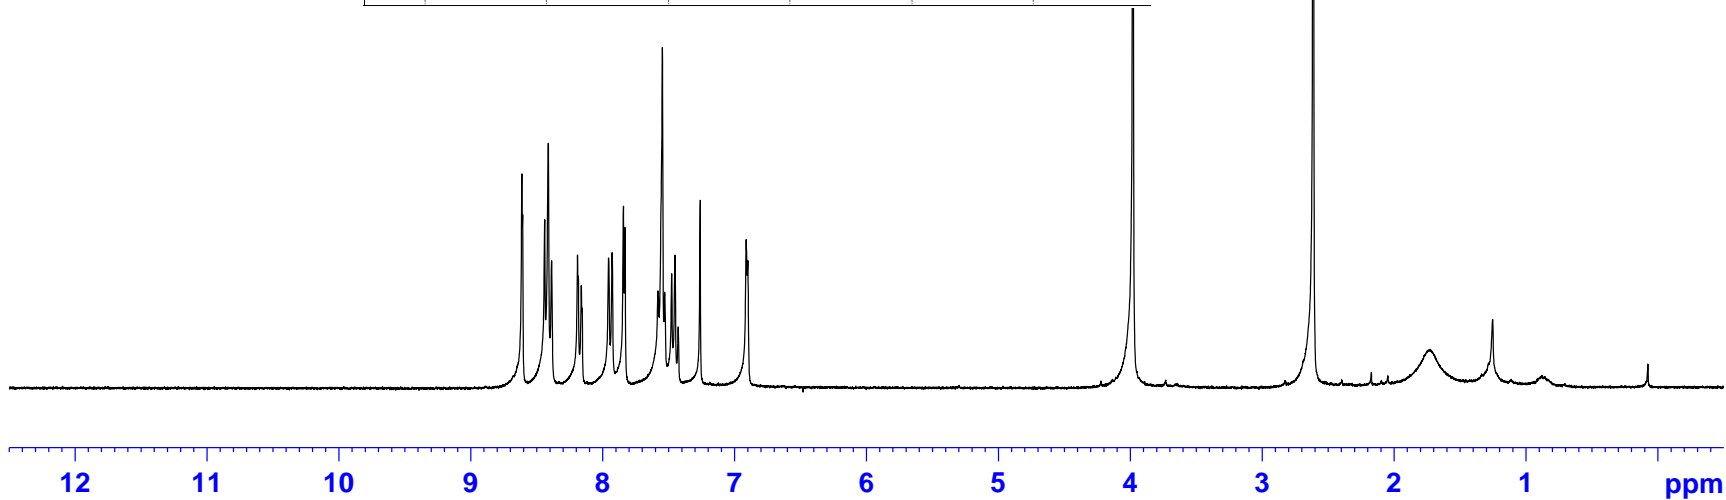

HPLC and  $^1\text{H}$  NMR Spectrum (300 MHz) of compound **3c** in  $\text{CDCl}_3$

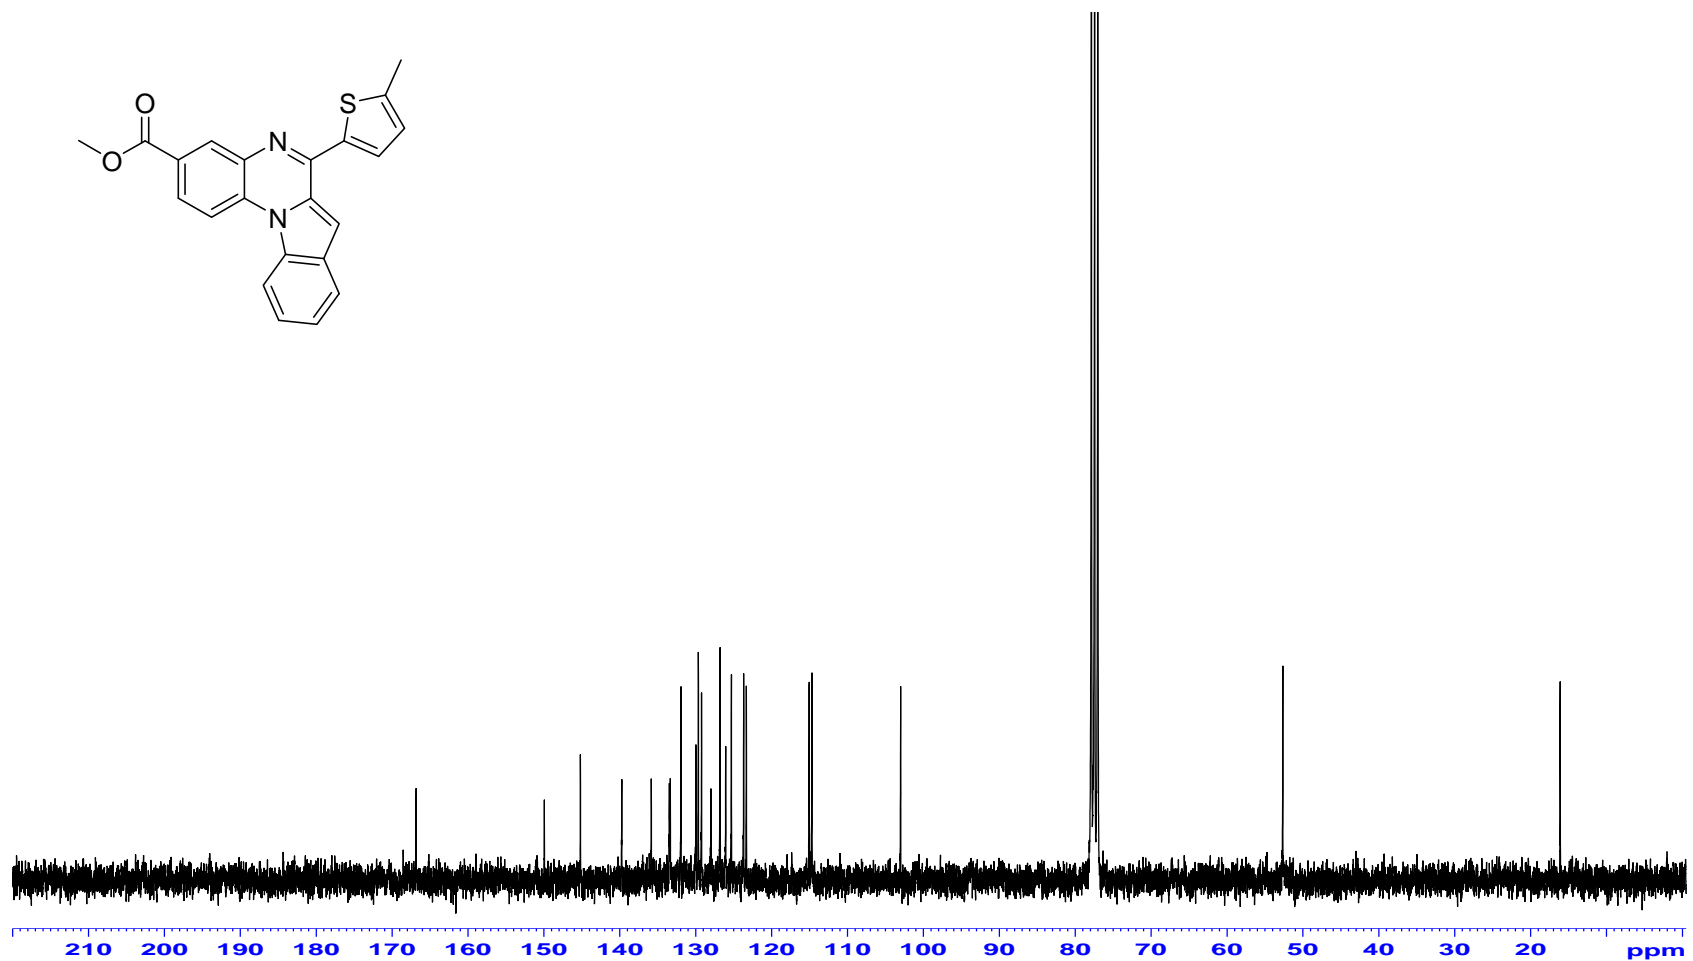

<sup>13</sup>C NMR Spectrum (75 MHz) of compound **3c** in CDCl<sub>3</sub>

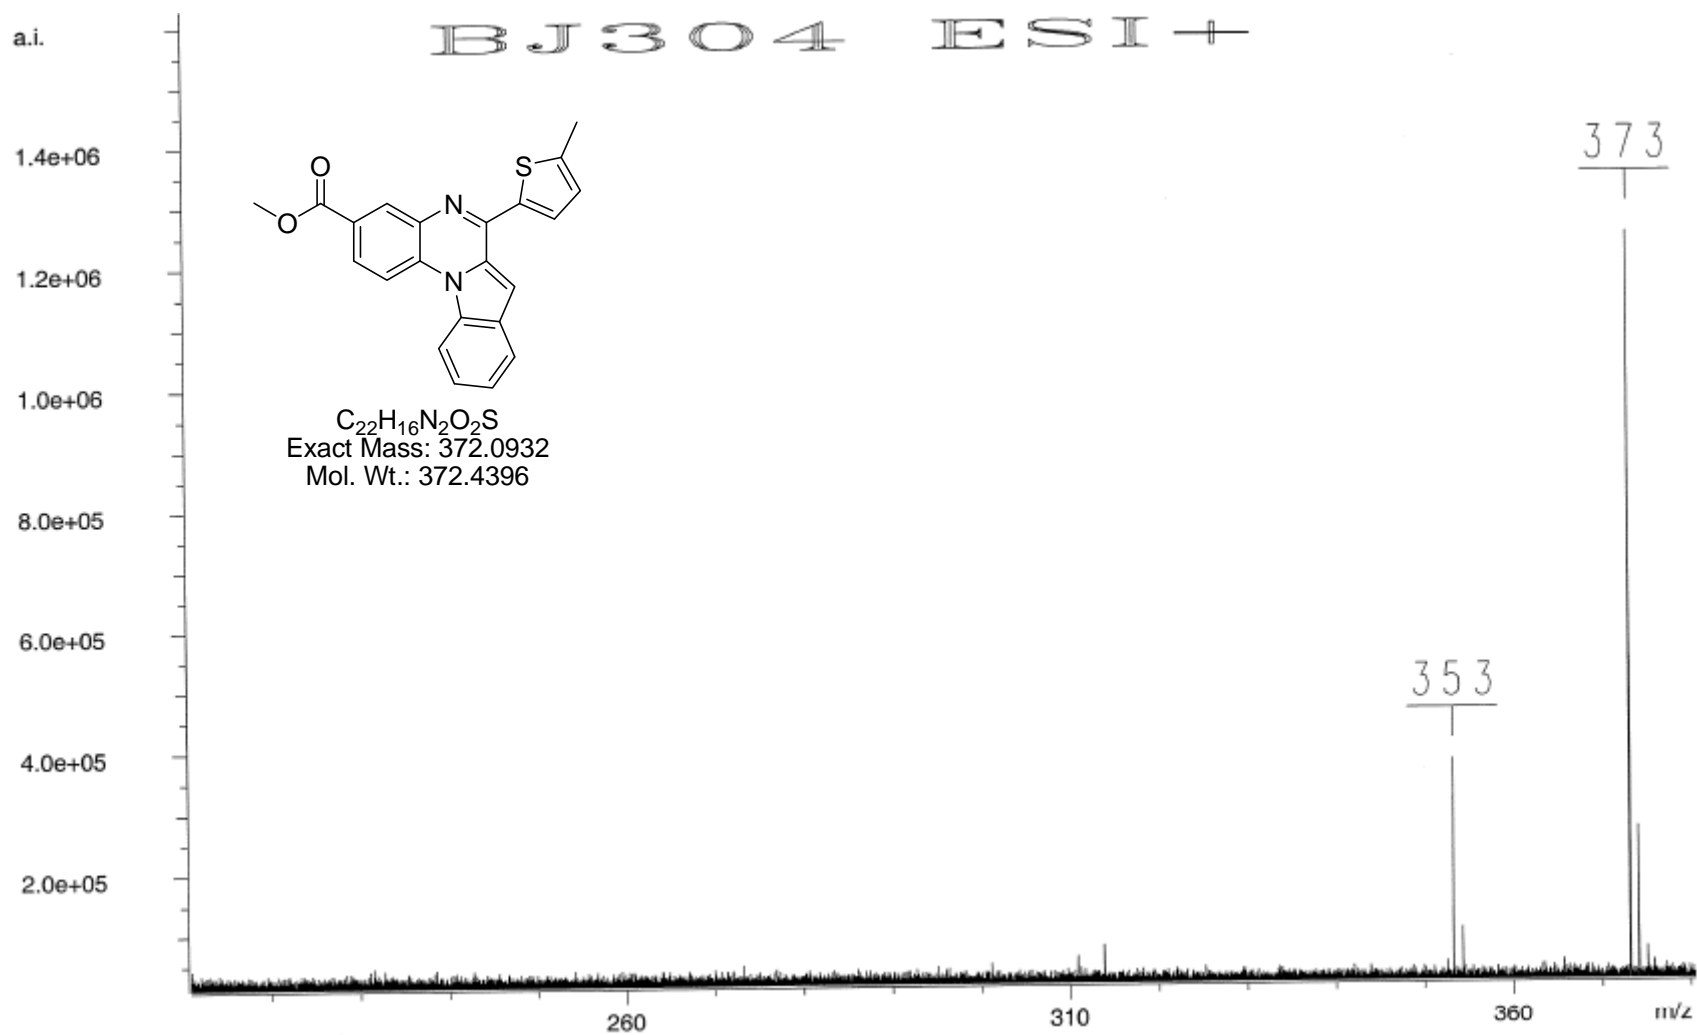

Low Resolution Mass Spectrum (LRMS) of compound **3c**



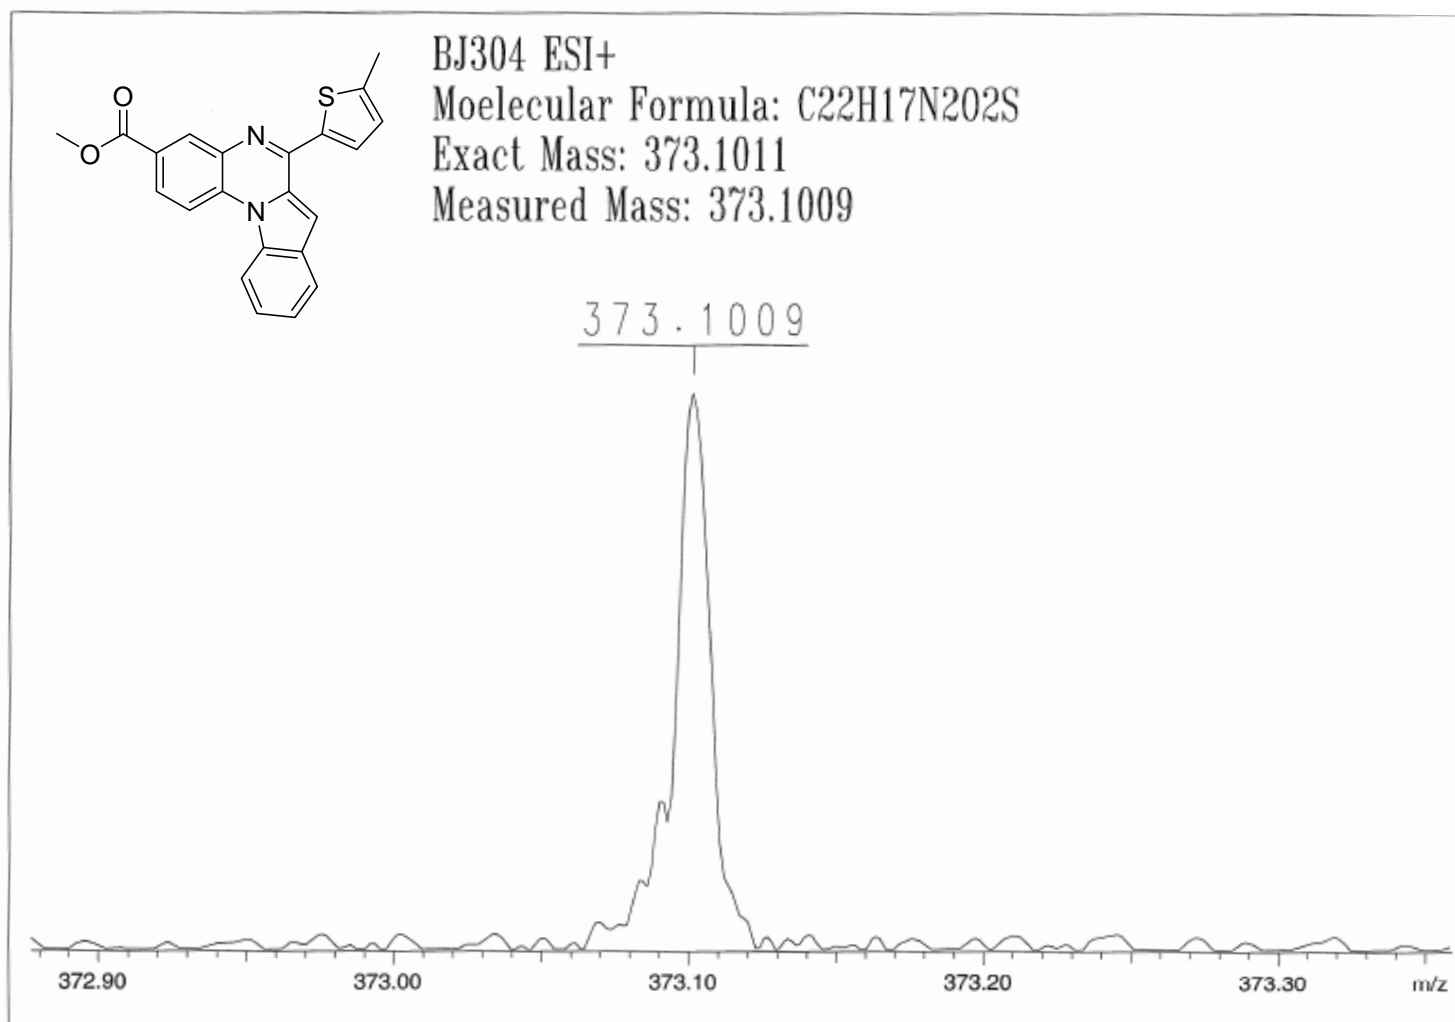

High Resolution Mass Spectrum (HRMS) of compound **3c**

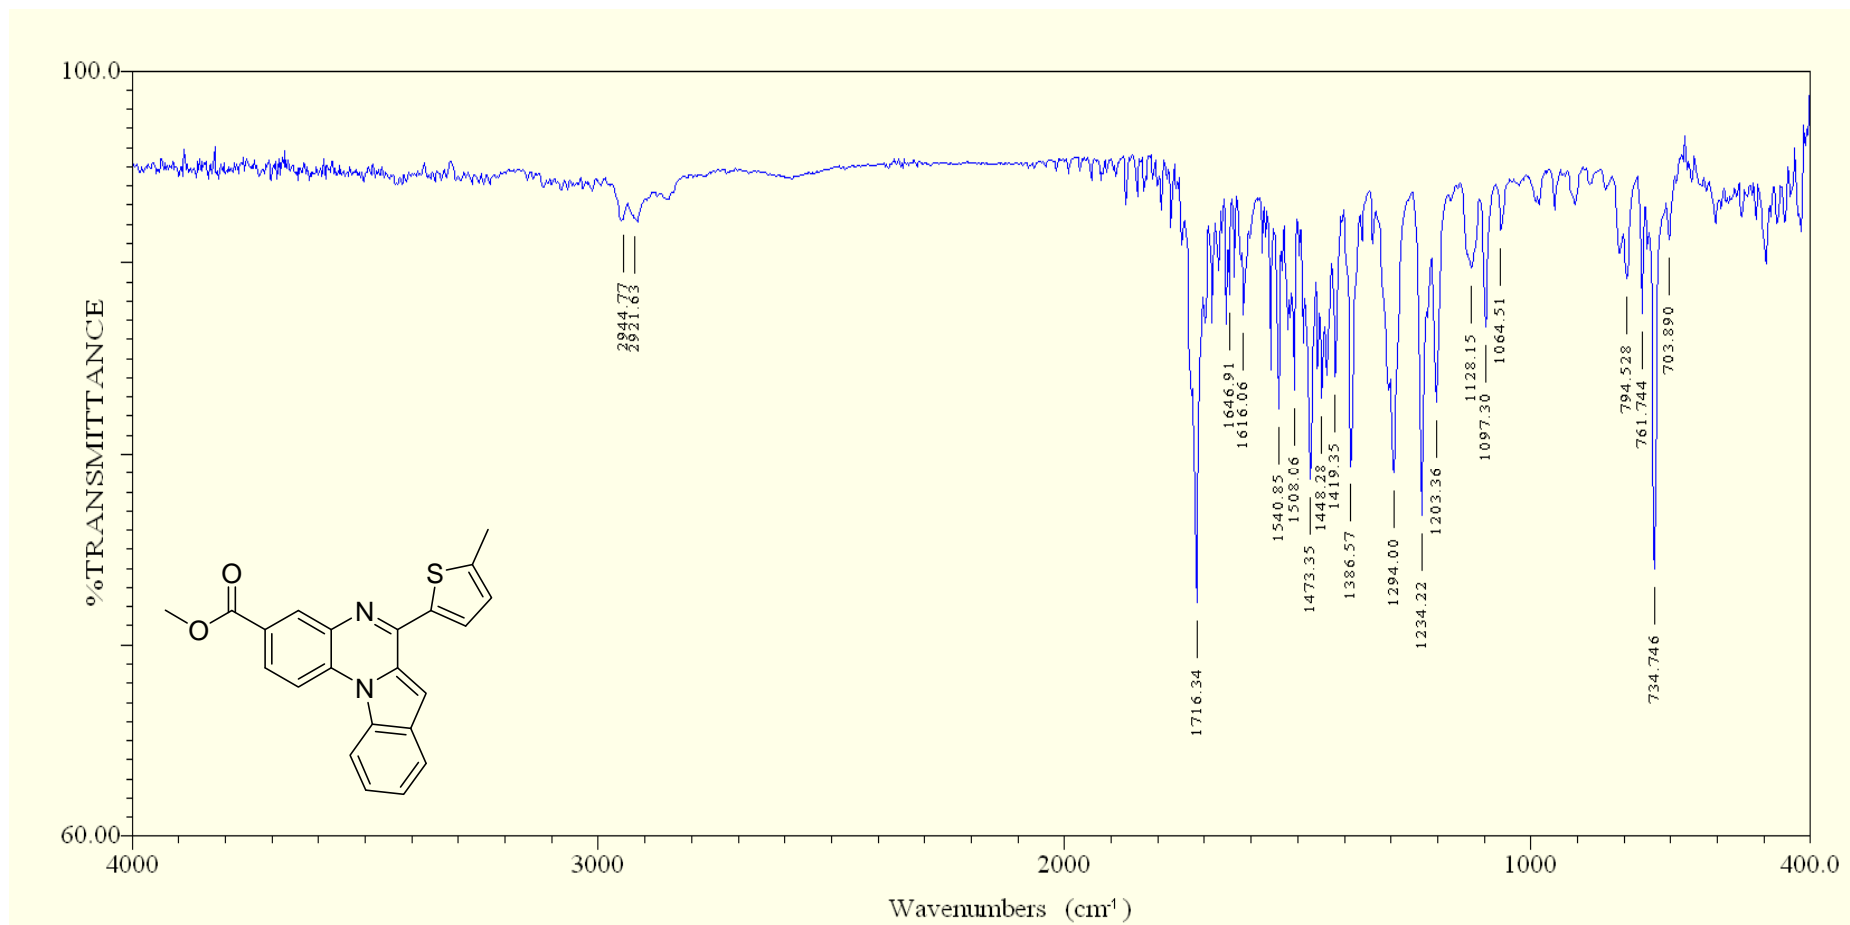

IR Spectrum of compound 3c (Neat)

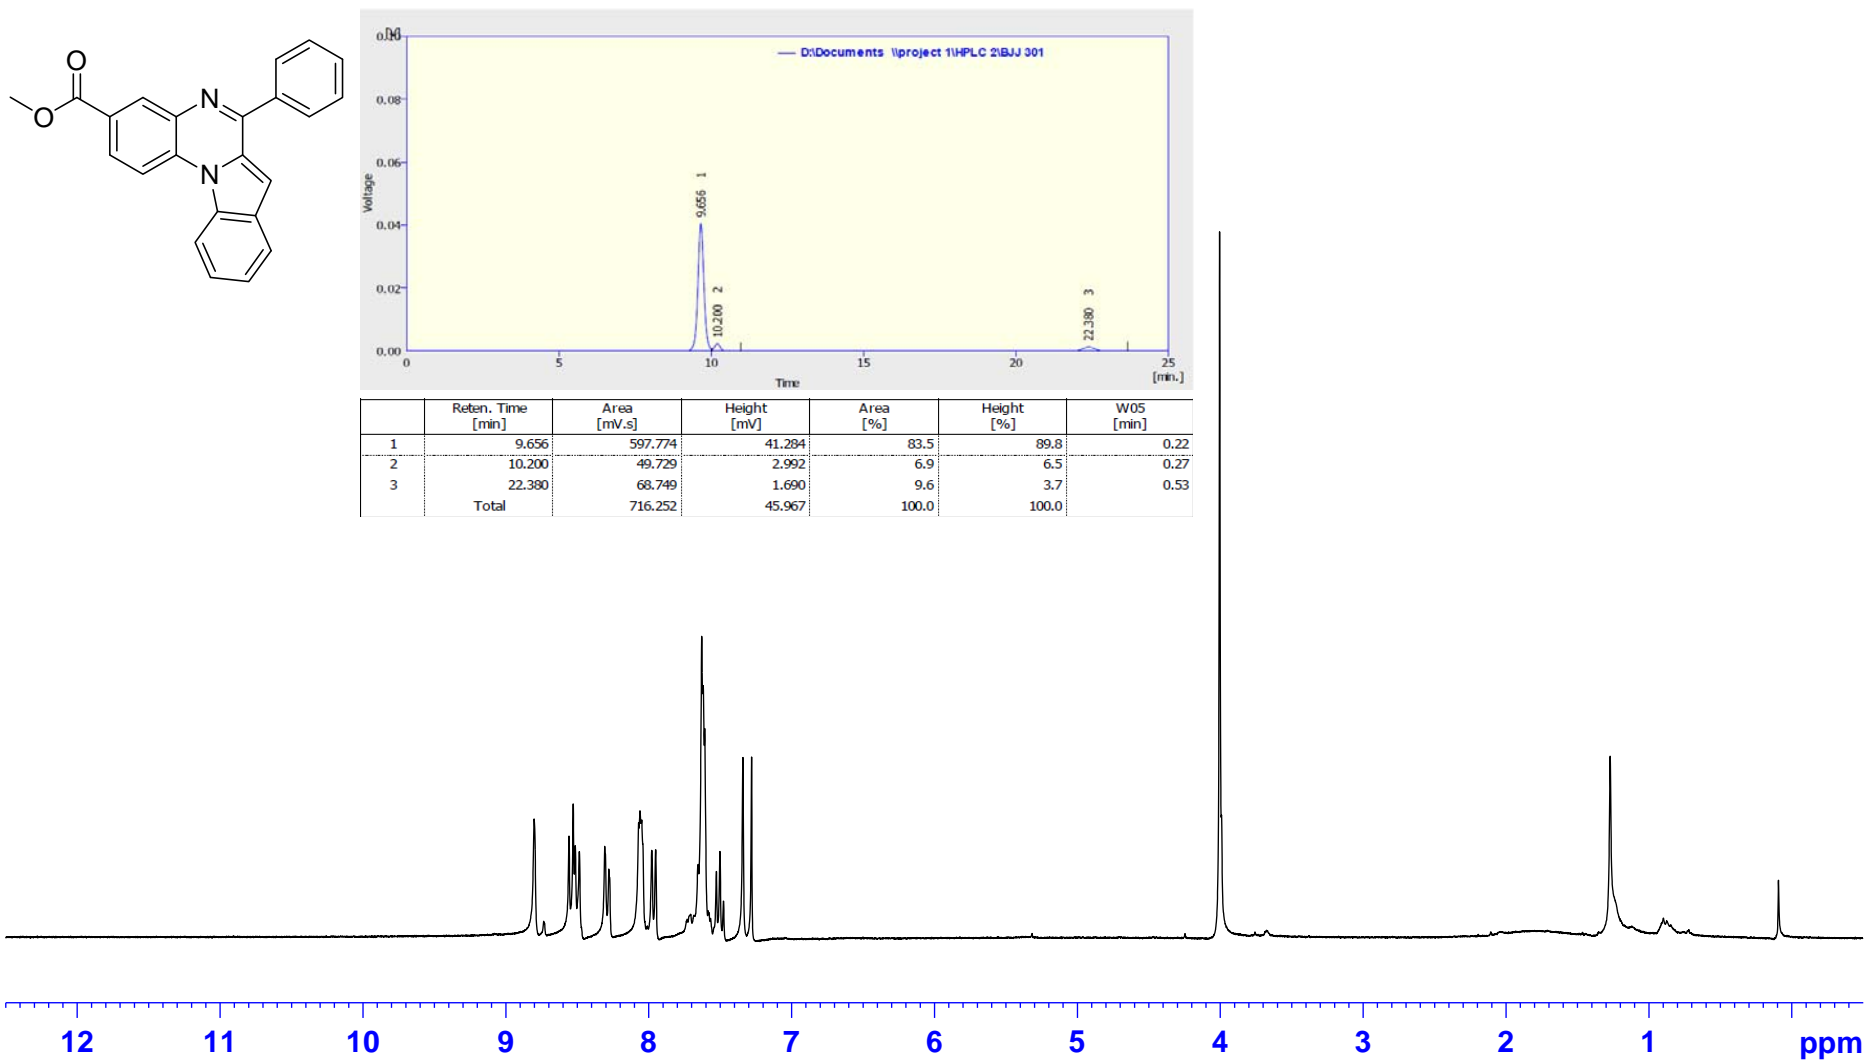

HPLC and <sup>1</sup>H NMR Spectrum (300 MHz) of compound **3d** in CDCl<sub>3</sub>

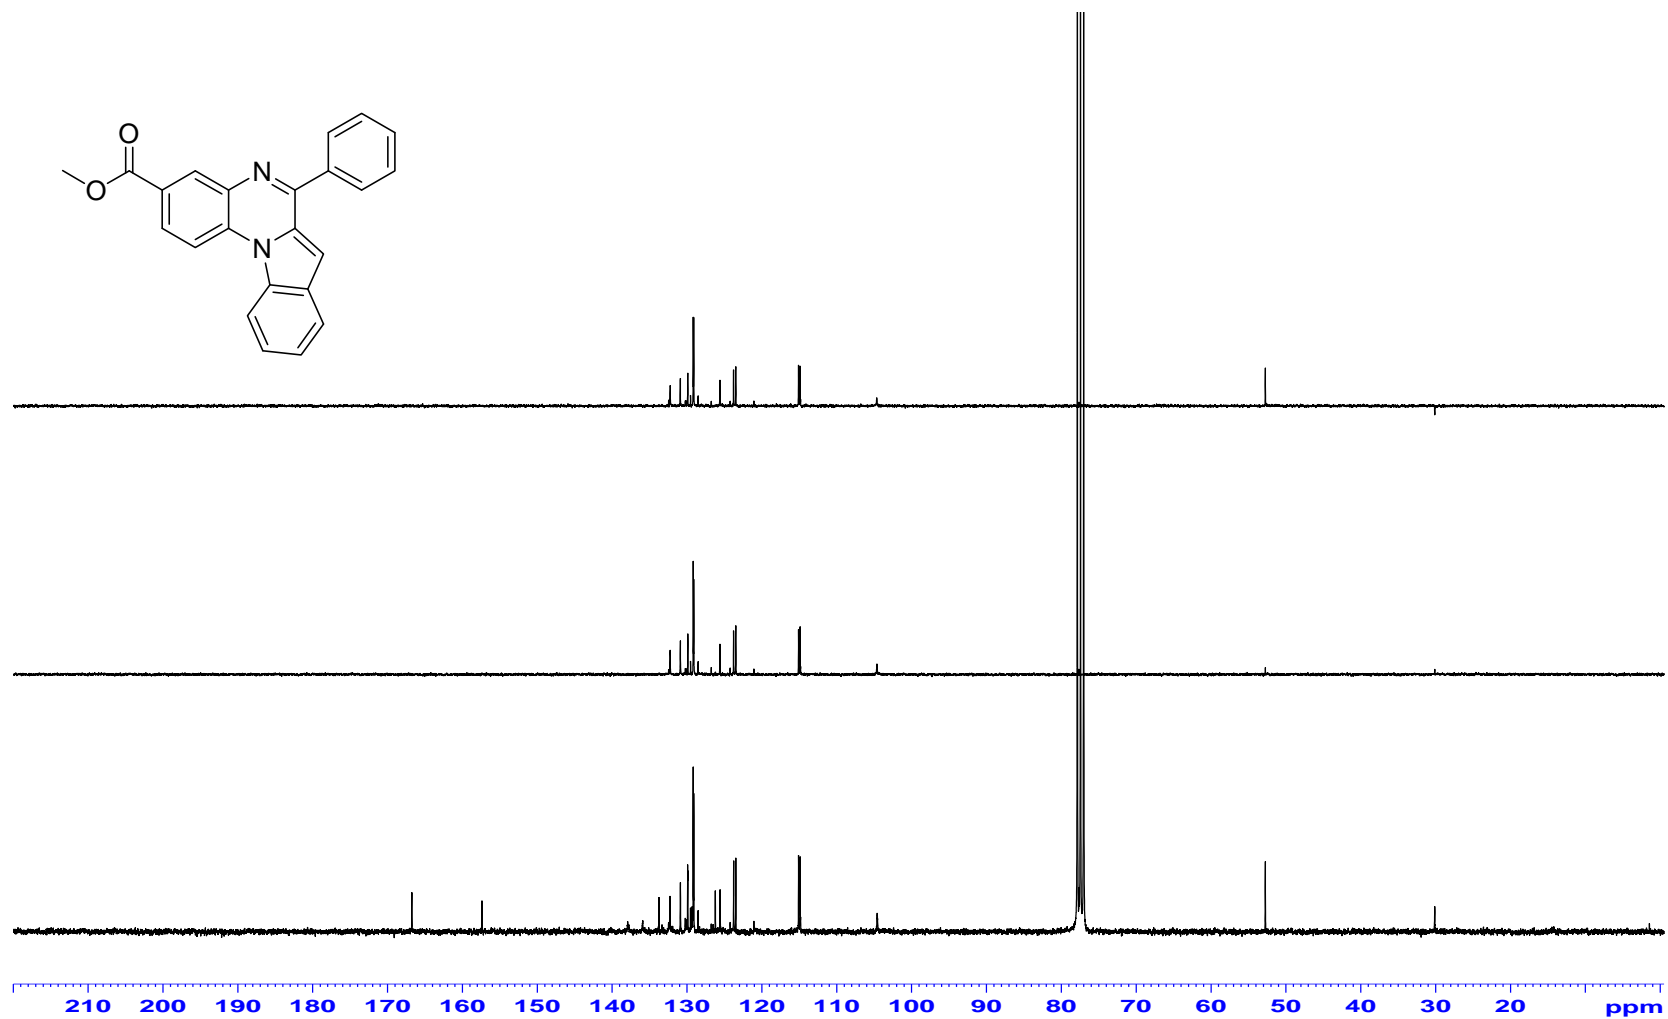

$^{13}\text{C}$ , DEPT NMR Spectrum (75 MHz) of compound **3d** in  $\text{CDCl}_3$

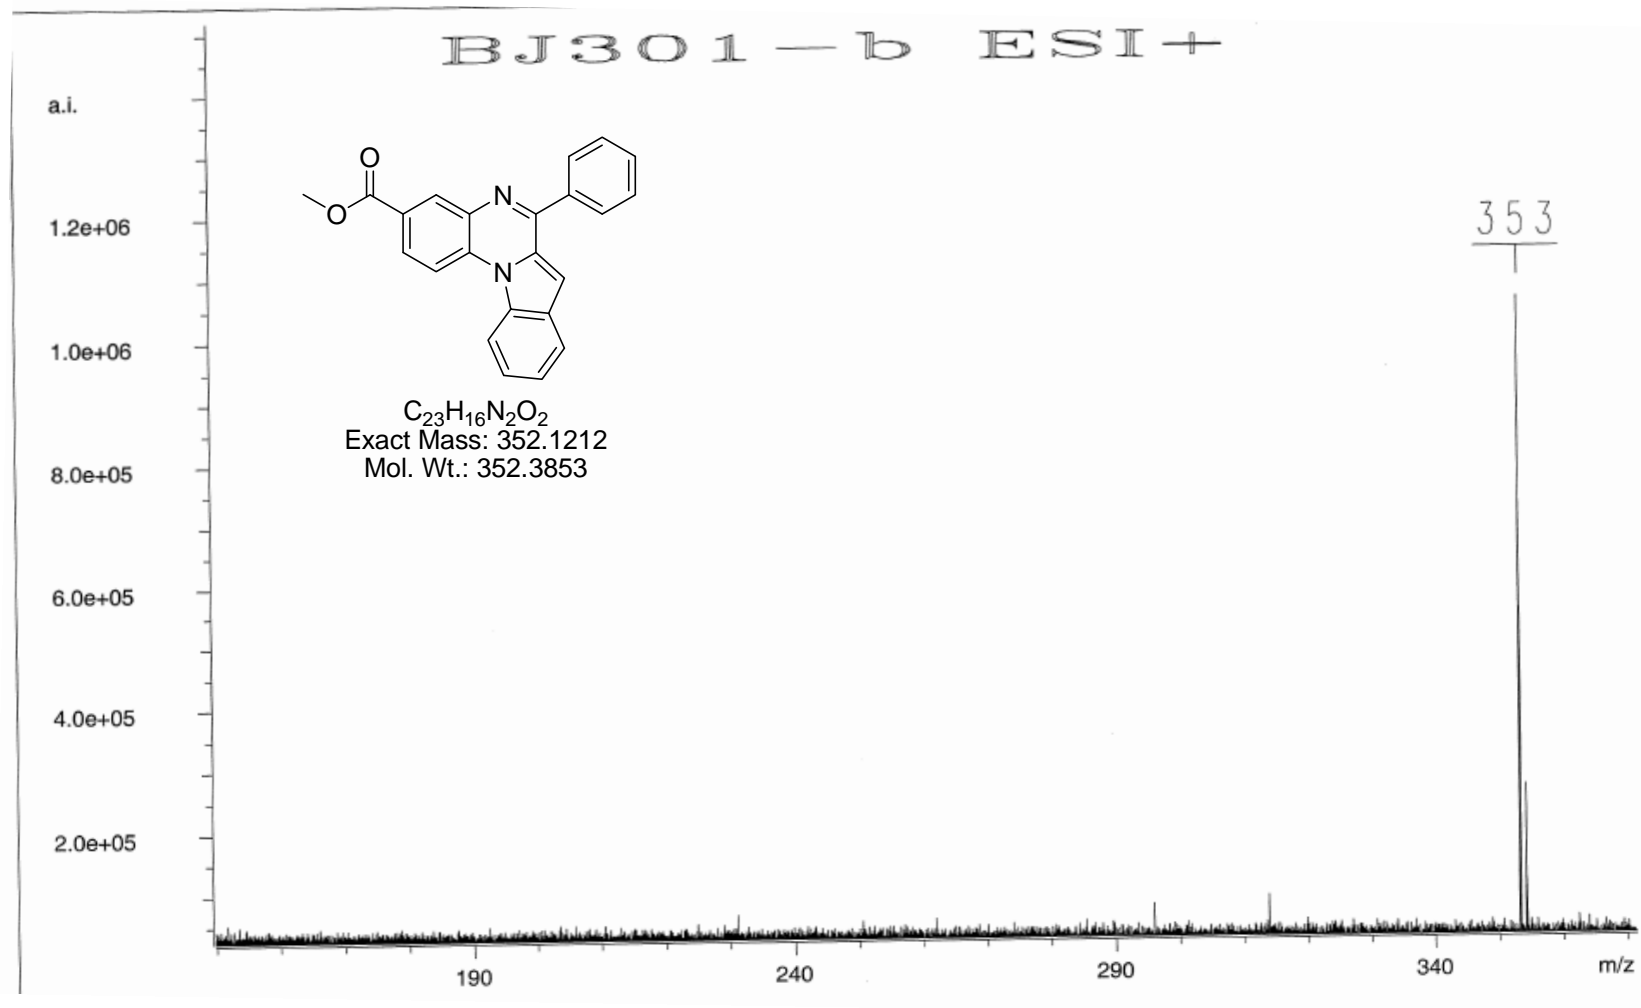

Low Resolution Mass Spectrum (LRMS) of compound **3d**

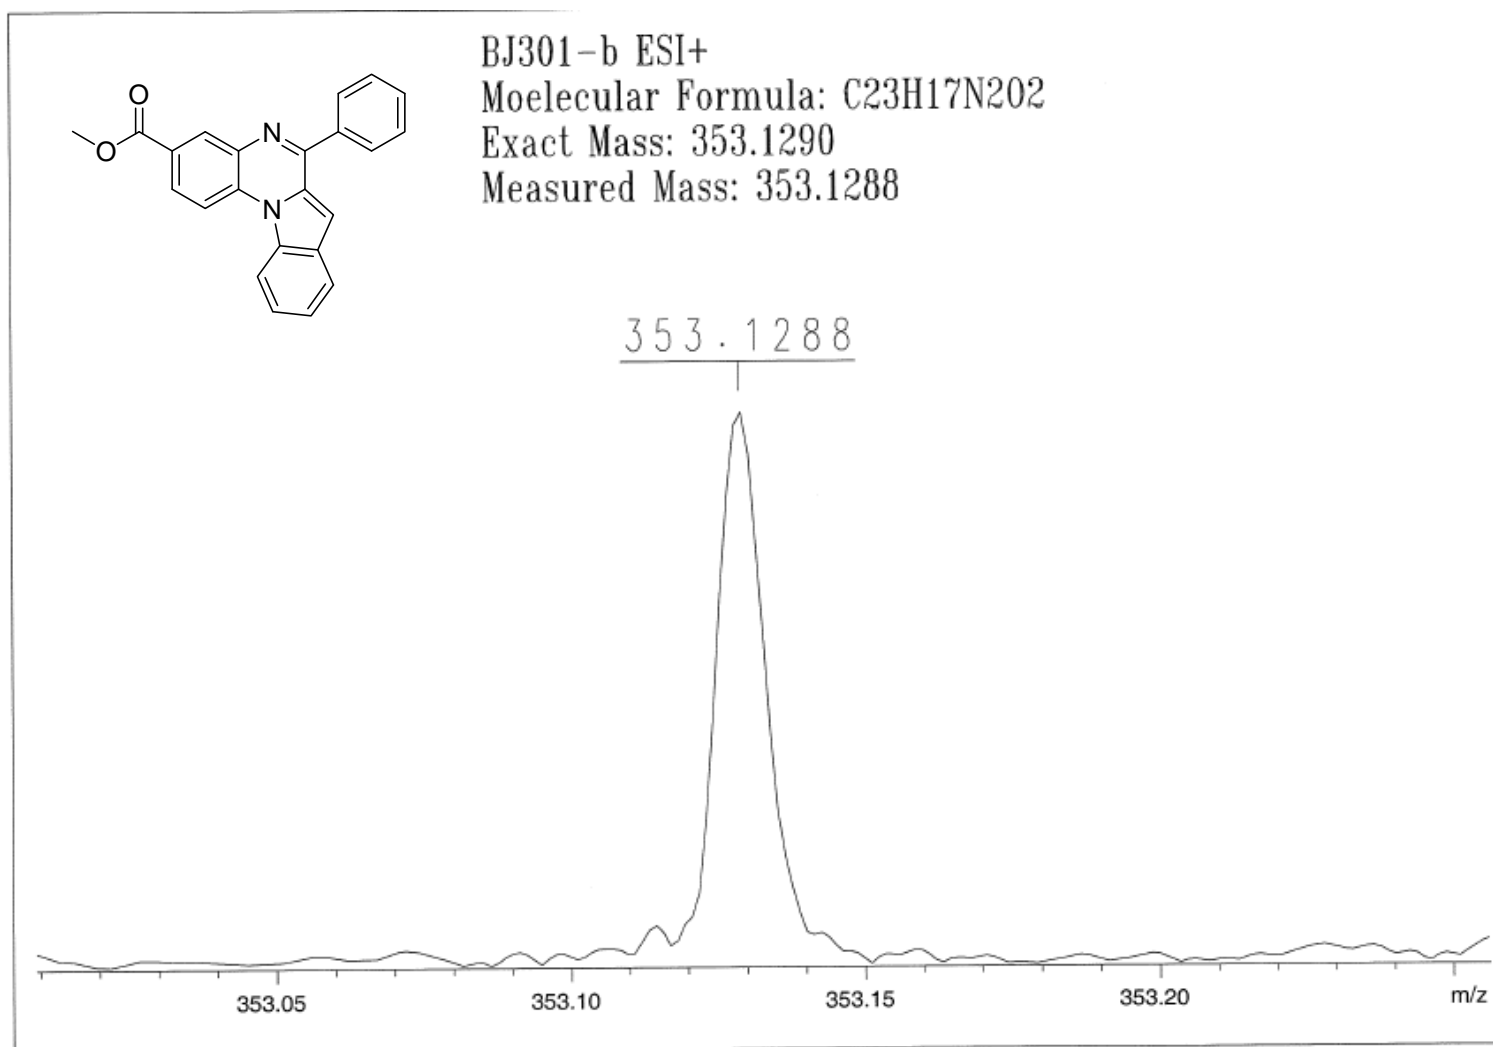

High Resolution Mass Spectrum (HRMS) of compound **3d**

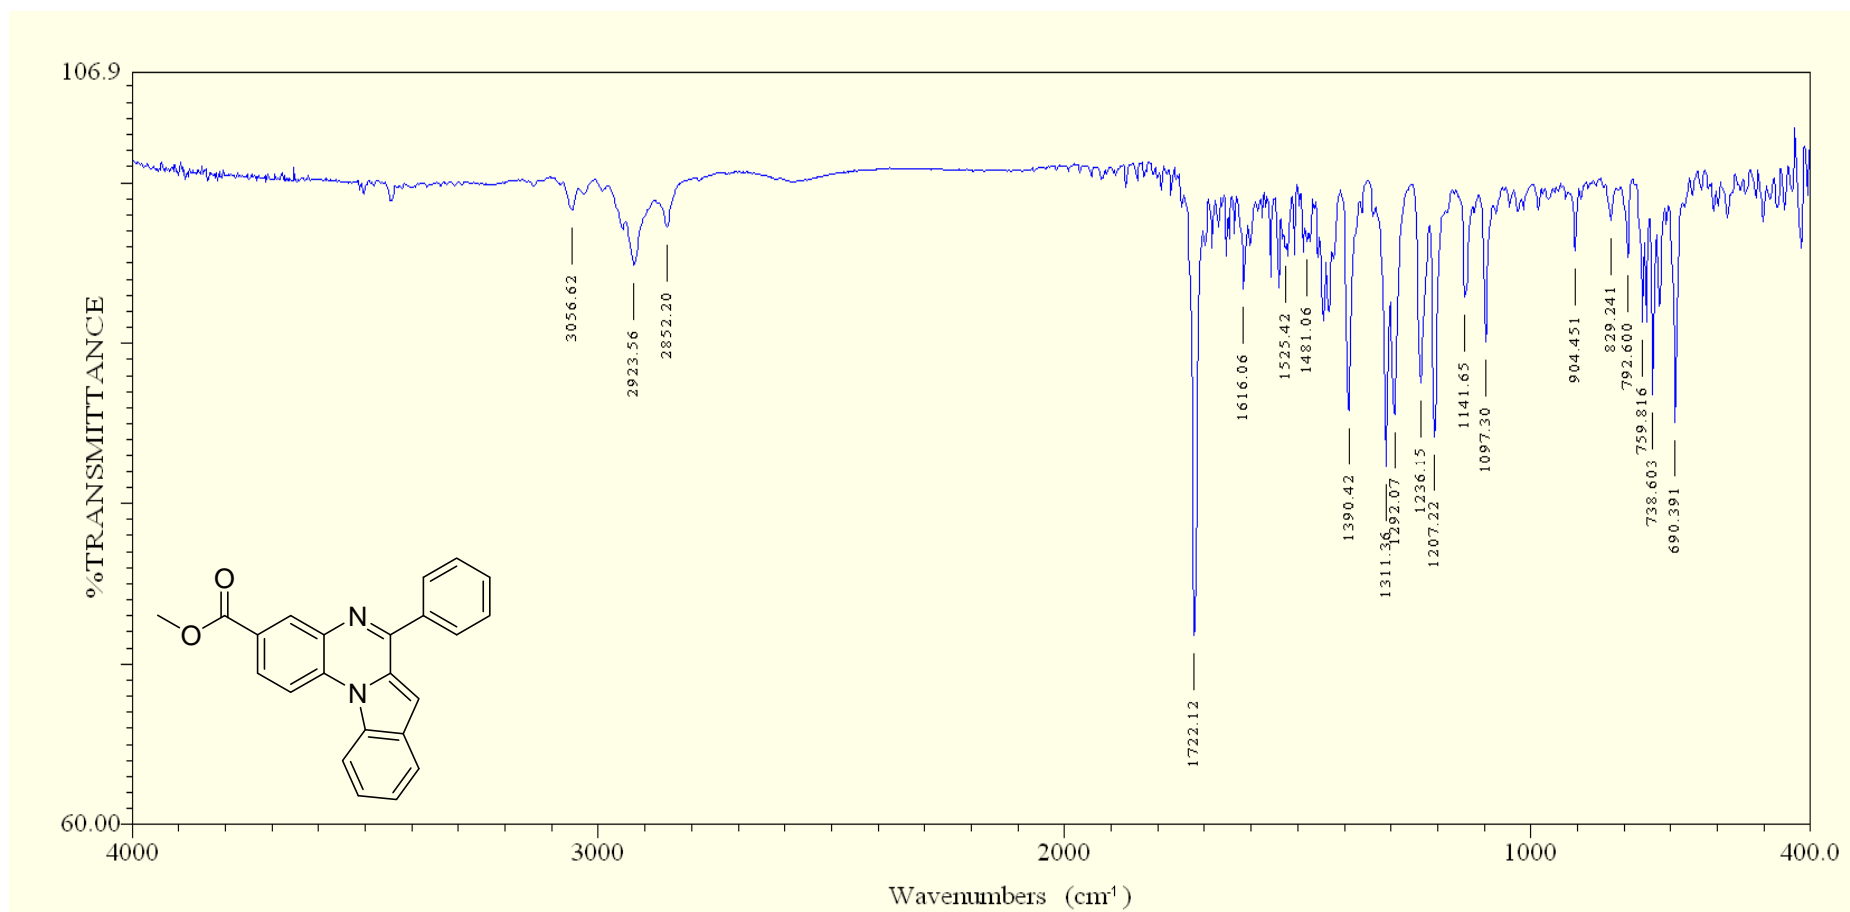

IR Spectrum of compound **3d** (Neat)

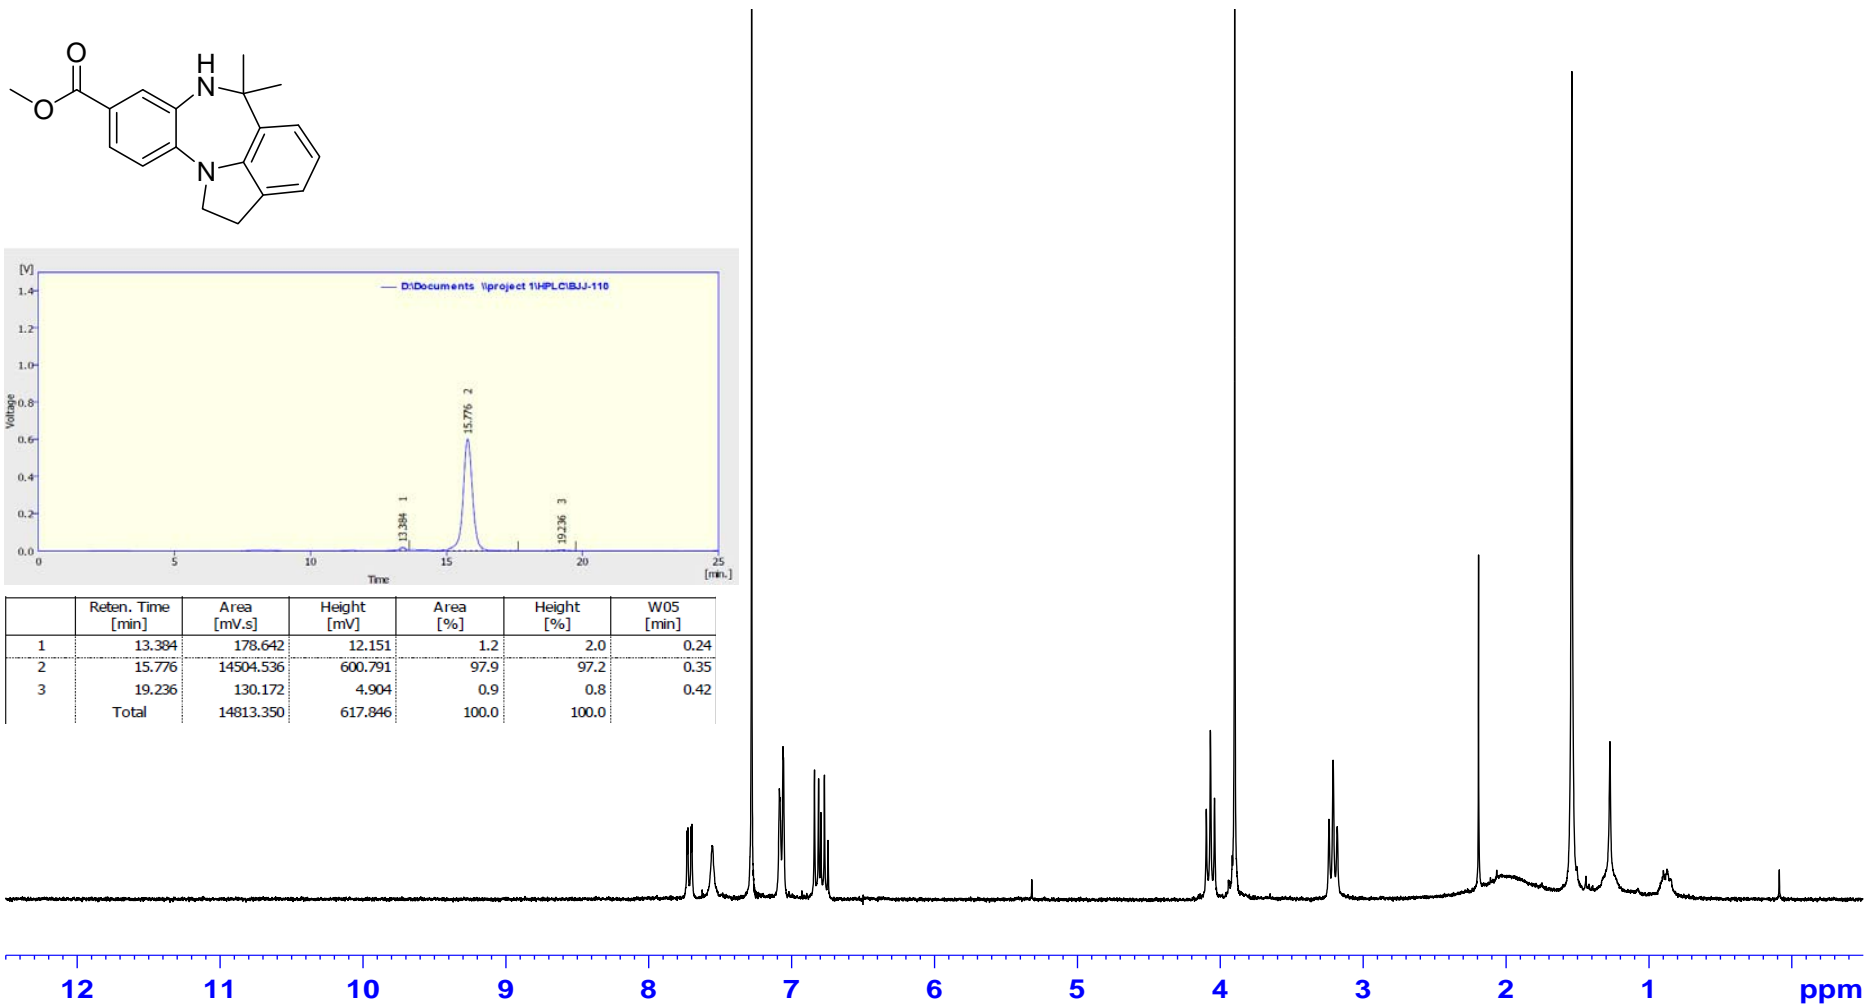

HPLC and <sup>1</sup>H NMR Spectrum (300 MHz) of compound **4a** in CDCl<sub>3</sub>



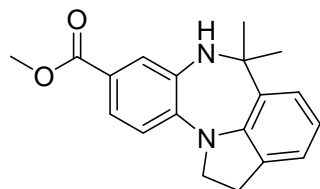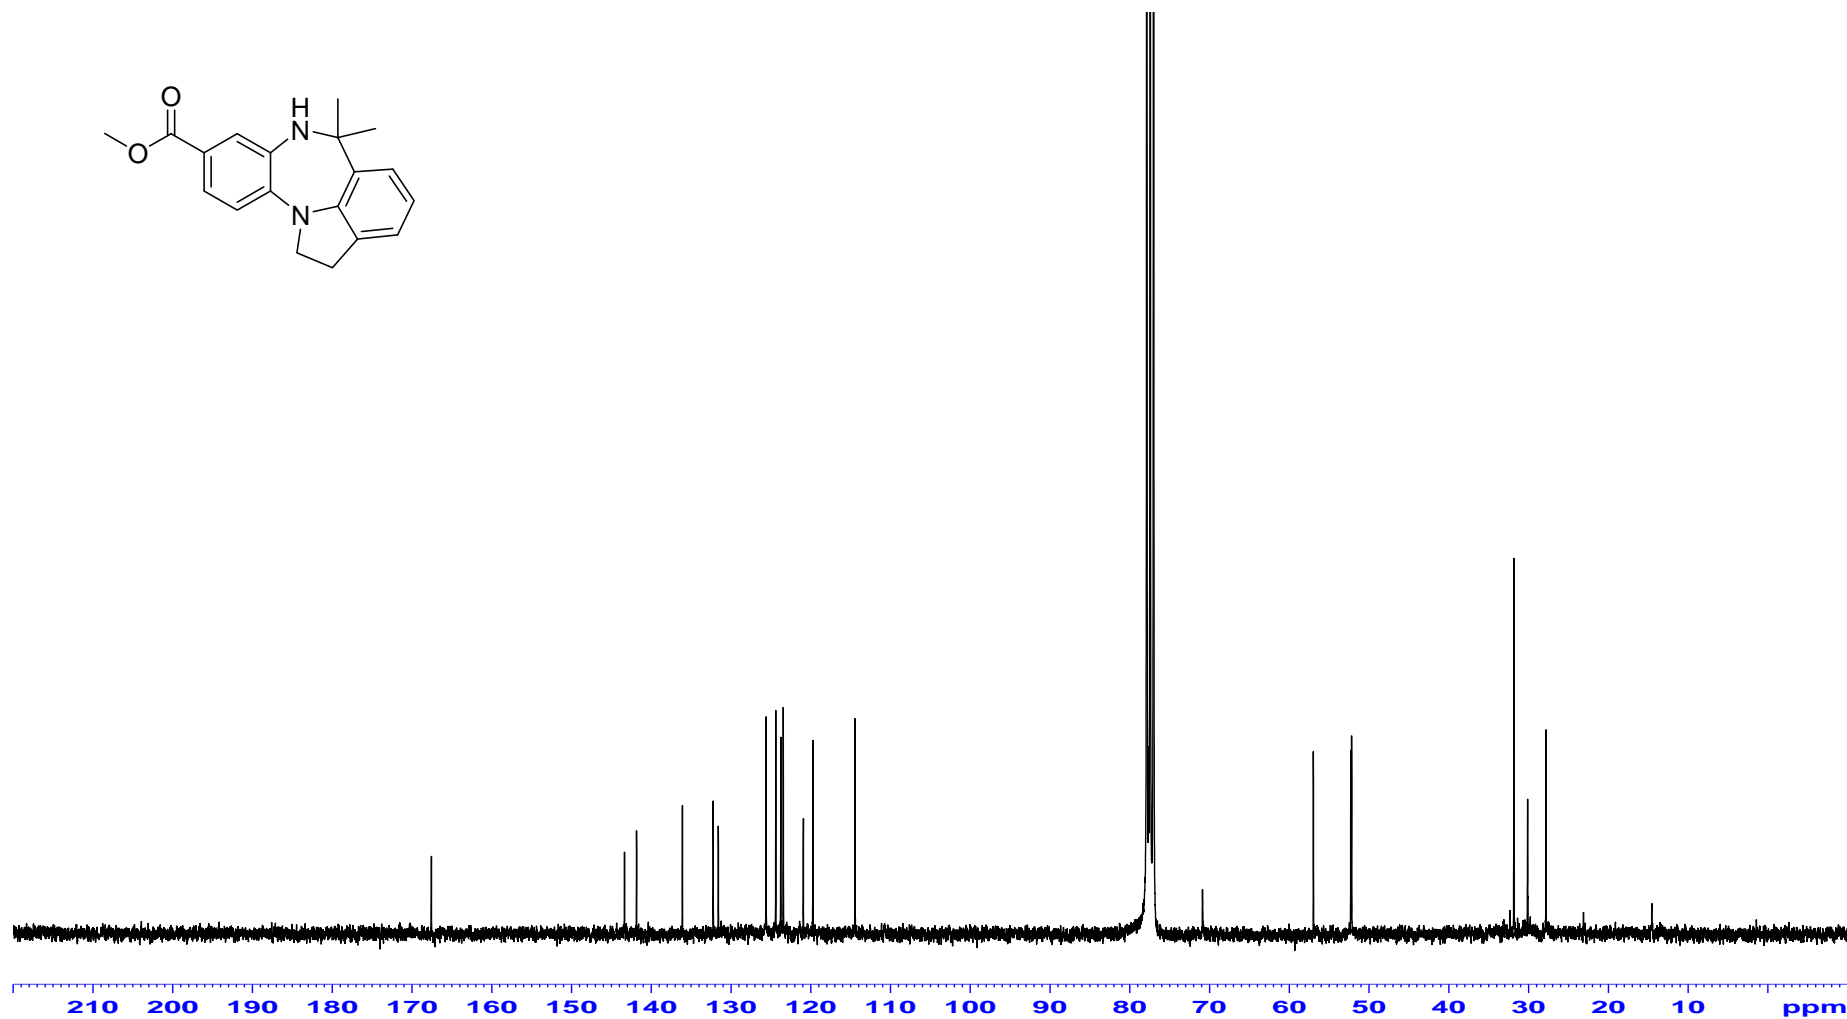

<sup>13</sup>C NMR Spectrum (75 MHz) of compound **4a** in CDCl<sub>3</sub>

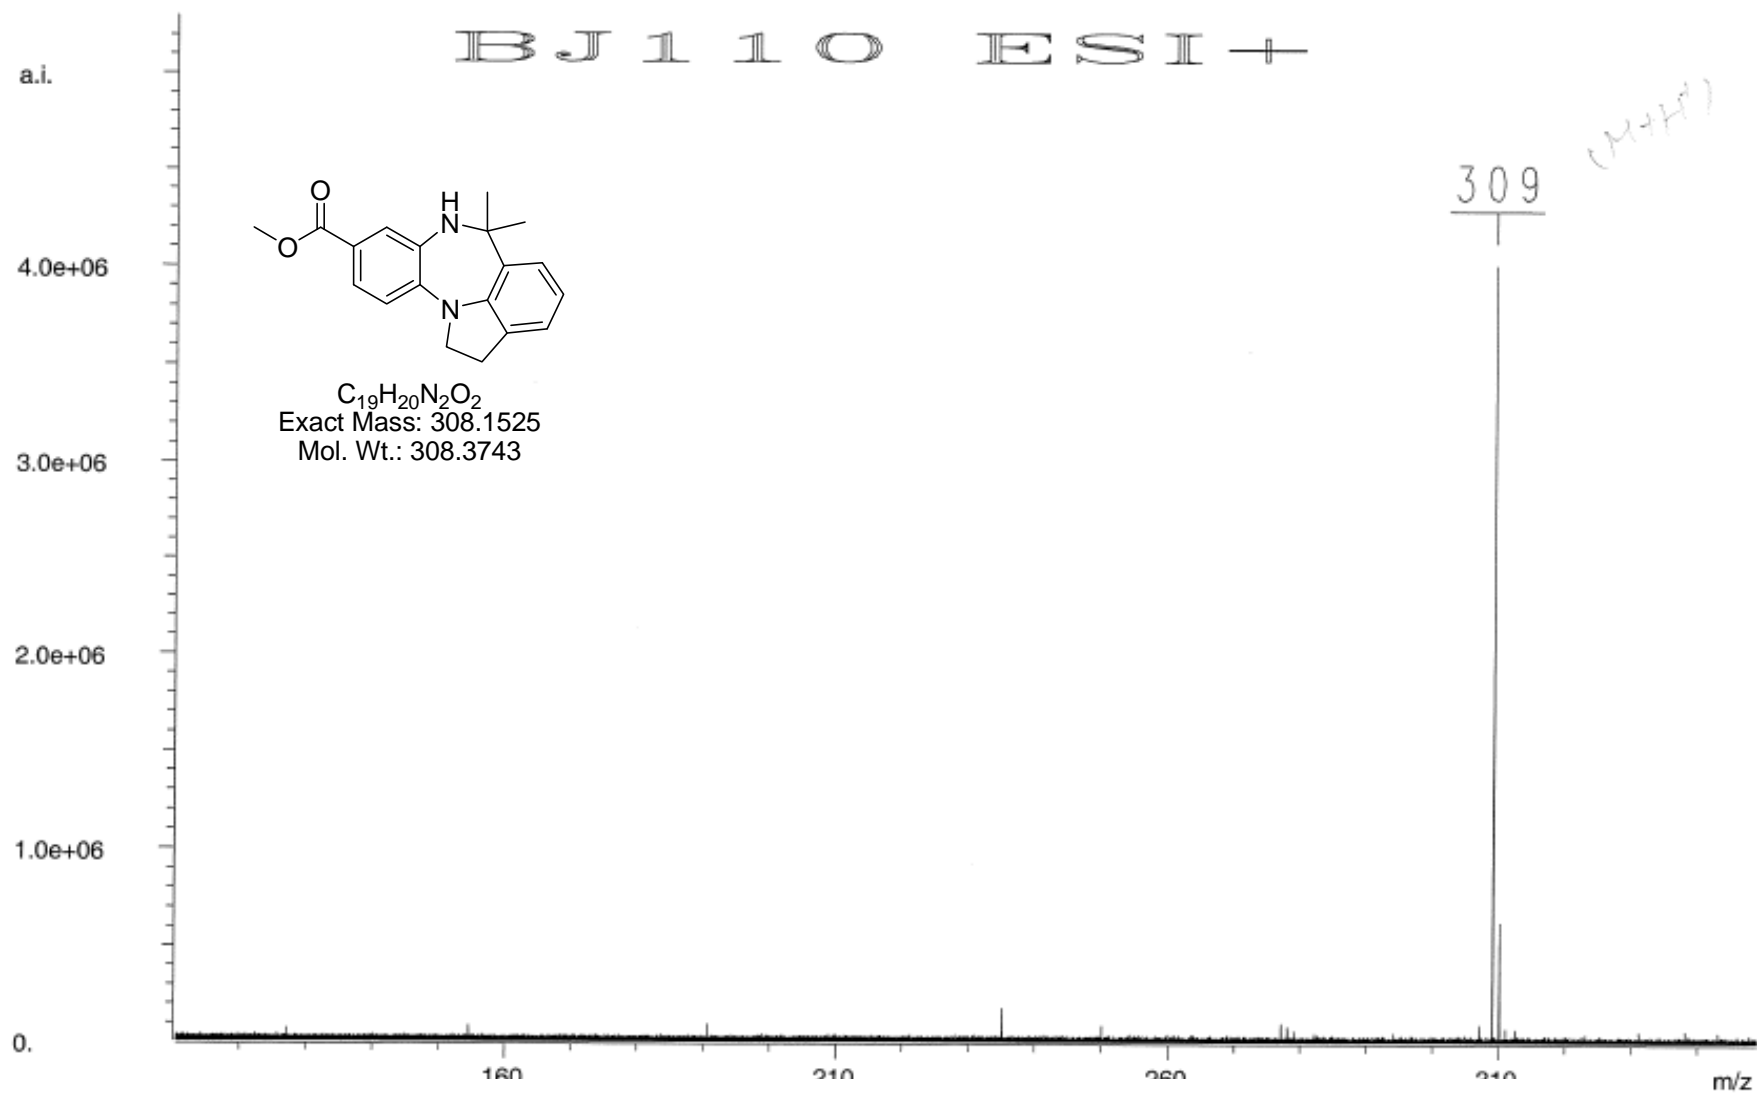

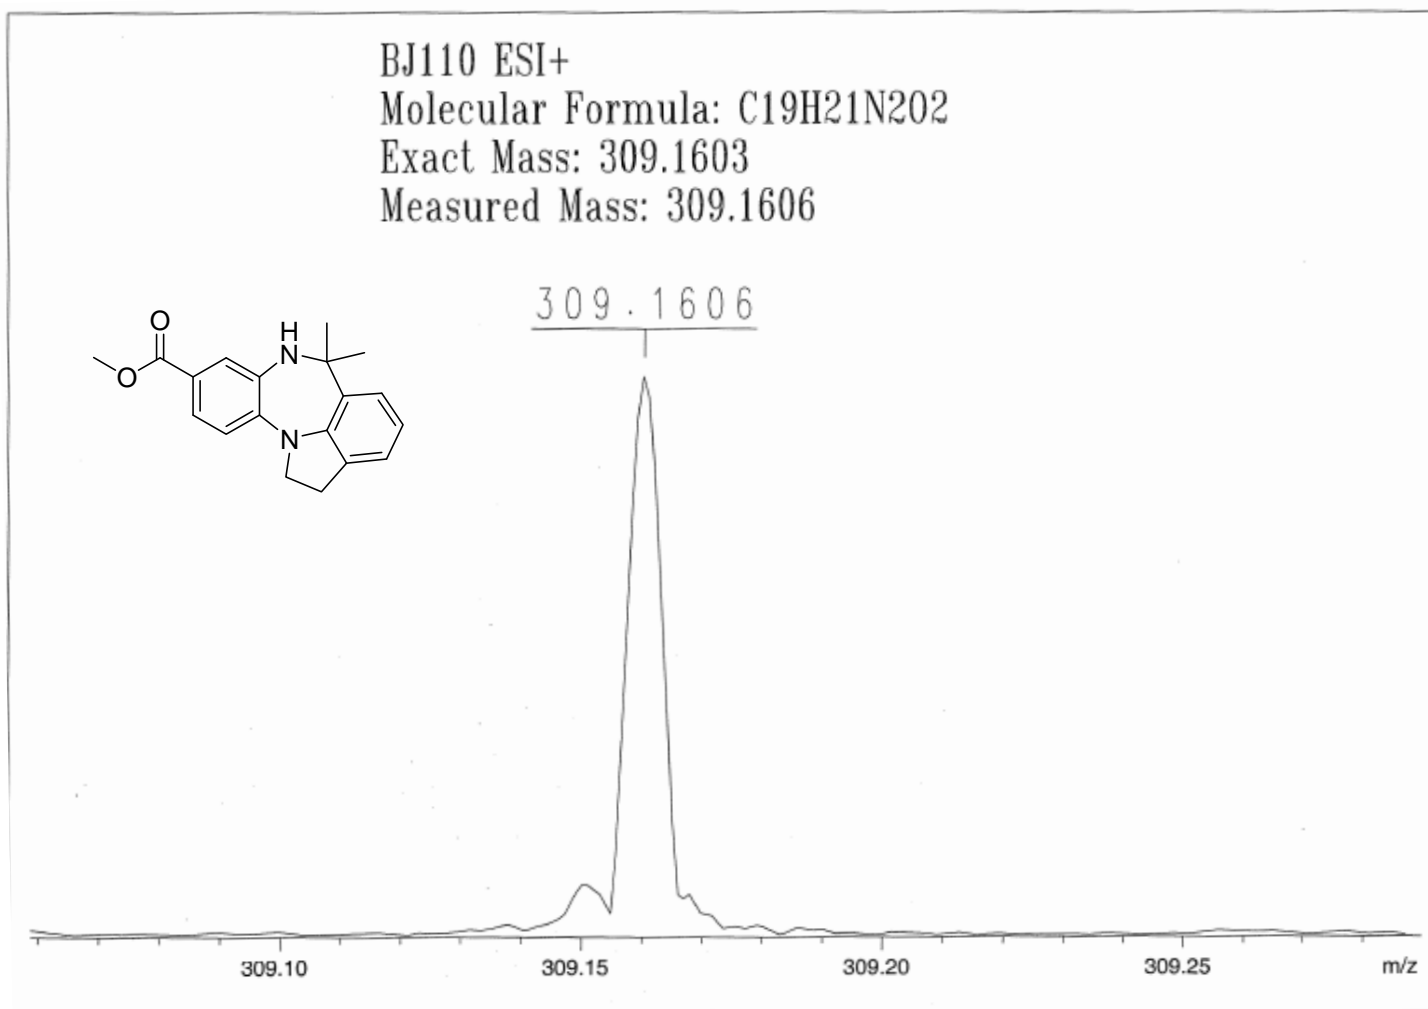

High Resolution Mass Spectrum (HRMS) of compound **4a**

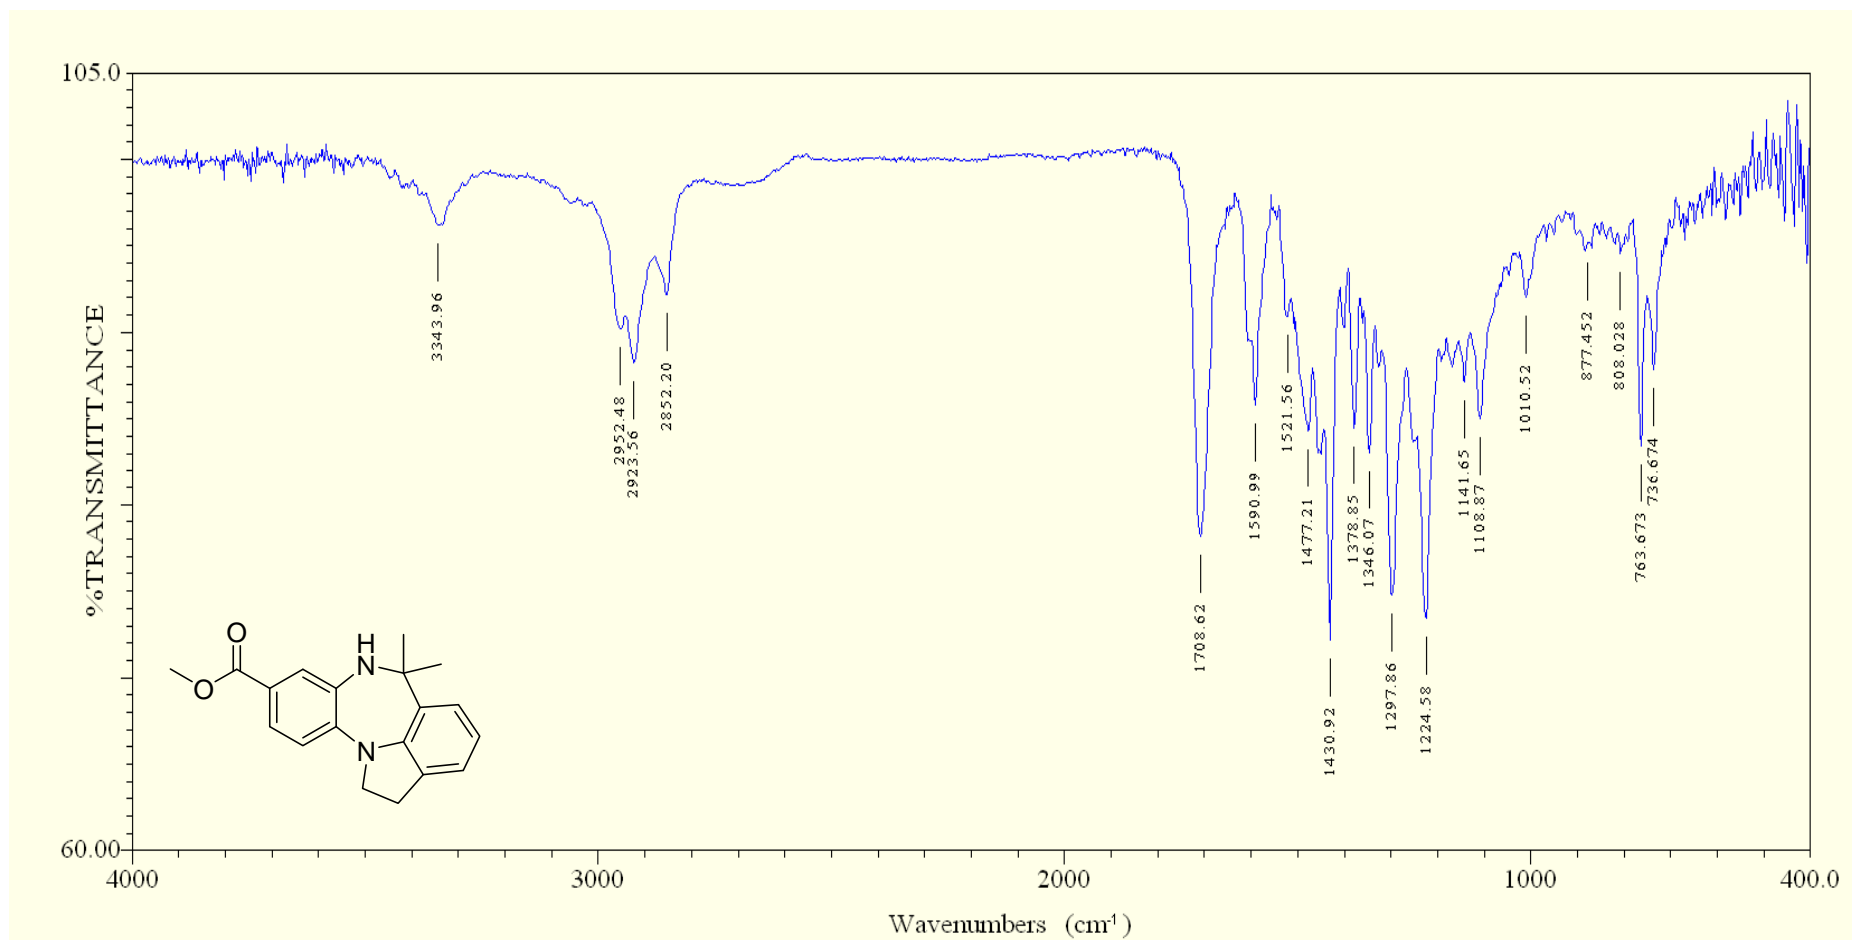

IR Spectrum of compound **4a** (Neat)

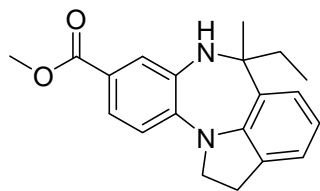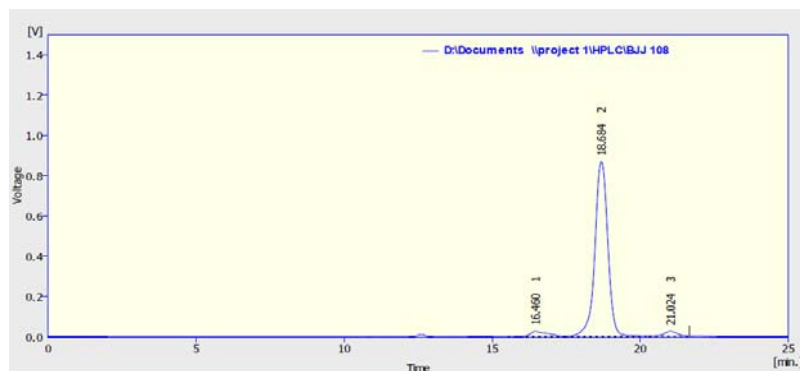

|       | Reten. Time [min] | Area [mV.s] | Height [mV] | Area [%] | Height [%] | W05 [min] |
|-------|-------------------|-------------|-------------|----------|------------|-----------|
| 1     | 16.460            | 1032.831    | 26.128      | 3.7      | 2.8        | 0.68      |
| 2     | 18.684            | 26302.147   | 867.260     | 93.8     | 94.5       | 0.46      |
| 3     | 21.024            | 695.044     | 23.943      | 2.5      | 2.6        | 0.44      |
| Total |                   | 28030.022   | 917.330     | 100.0    | 100.0      |           |

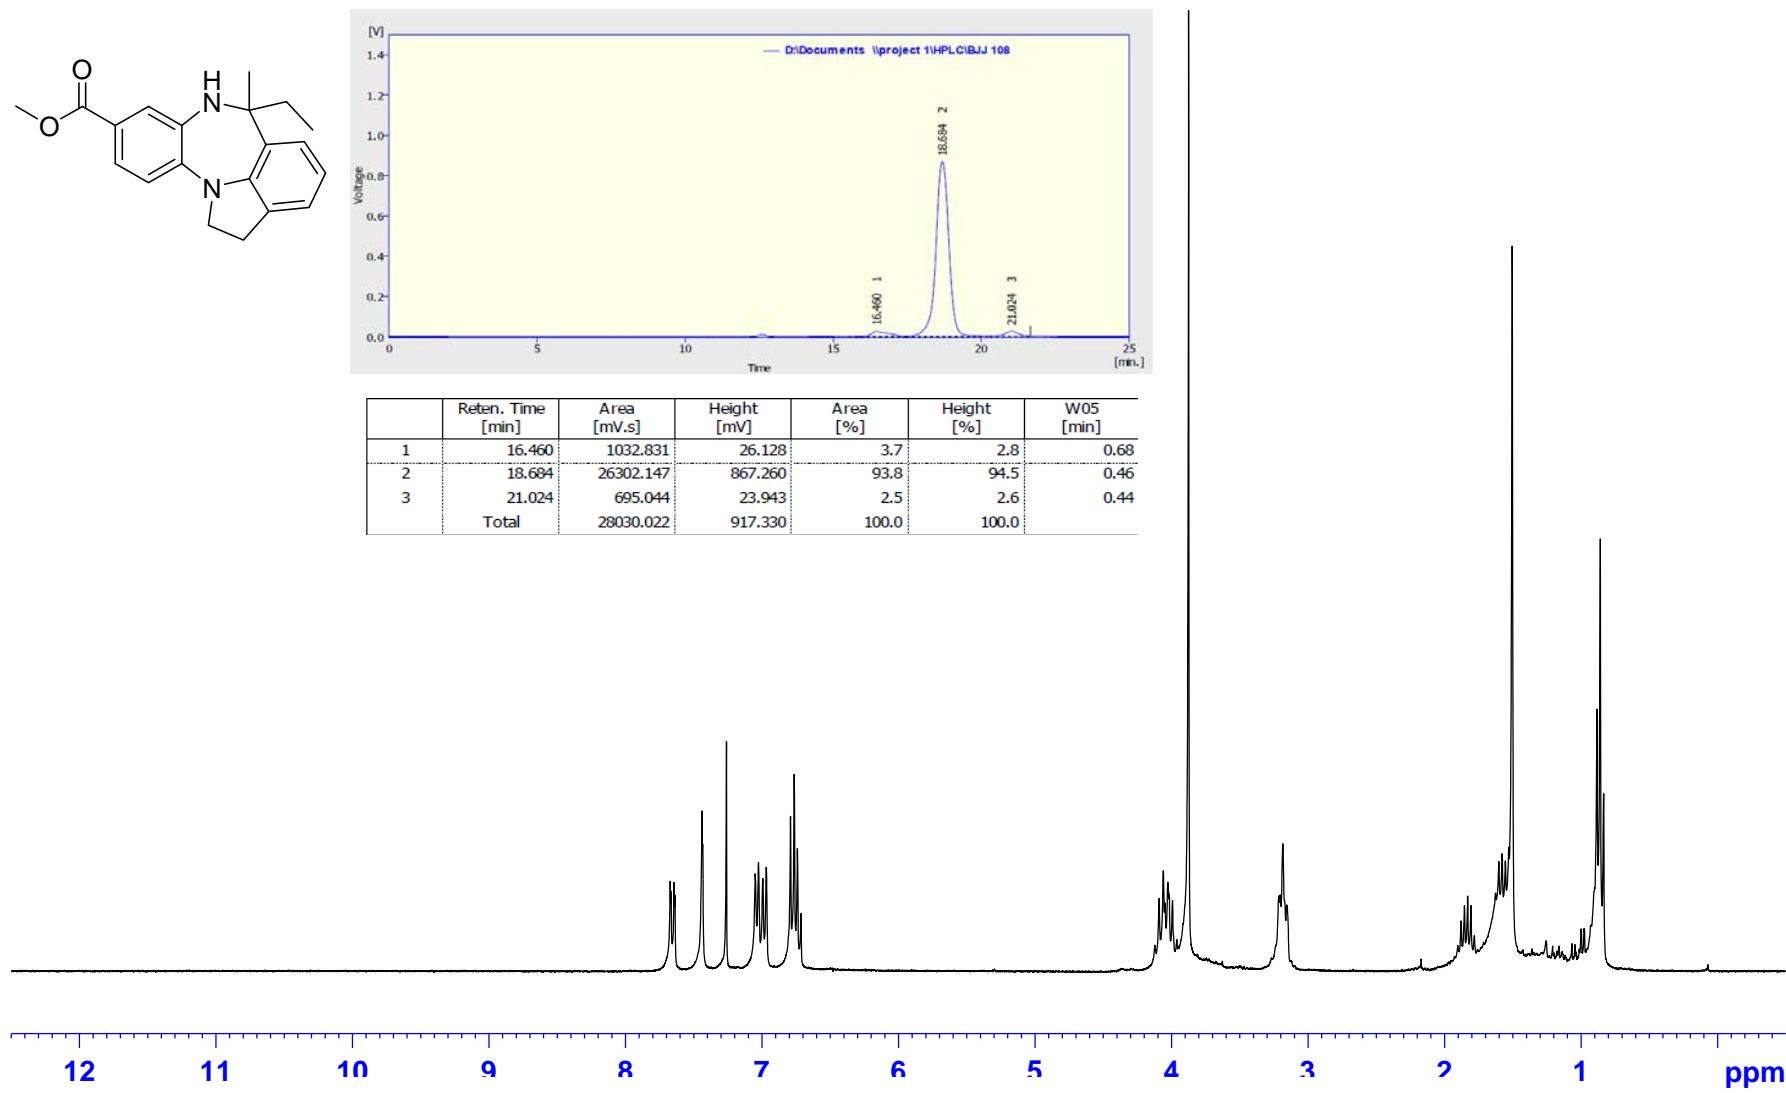

HPLC and <sup>1</sup>H NMR Spectrum (300 MHz) of compound **4b** in CDCl<sub>3</sub>

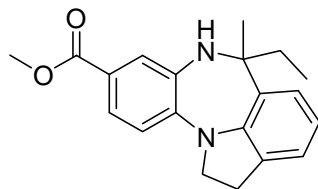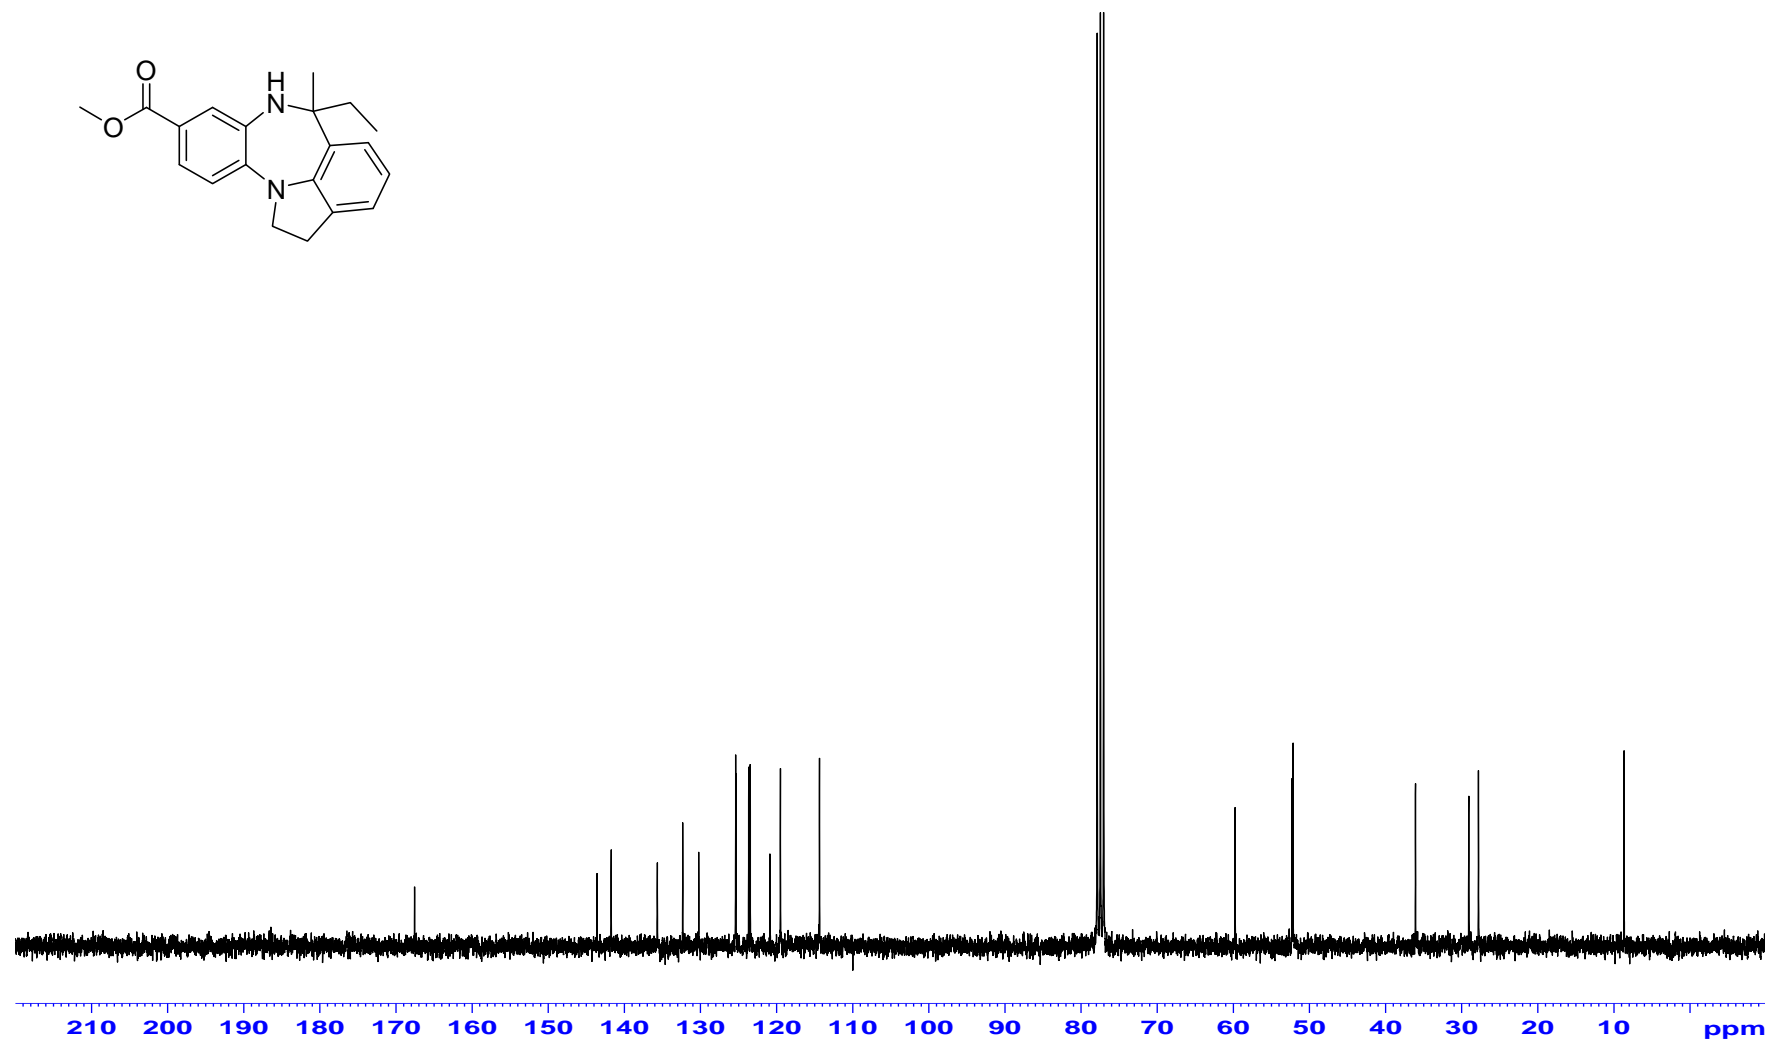

$^{13}\text{C}$  NMR Spectrum (75 MHz) of compound **4b** in  $\text{CDCl}_3$

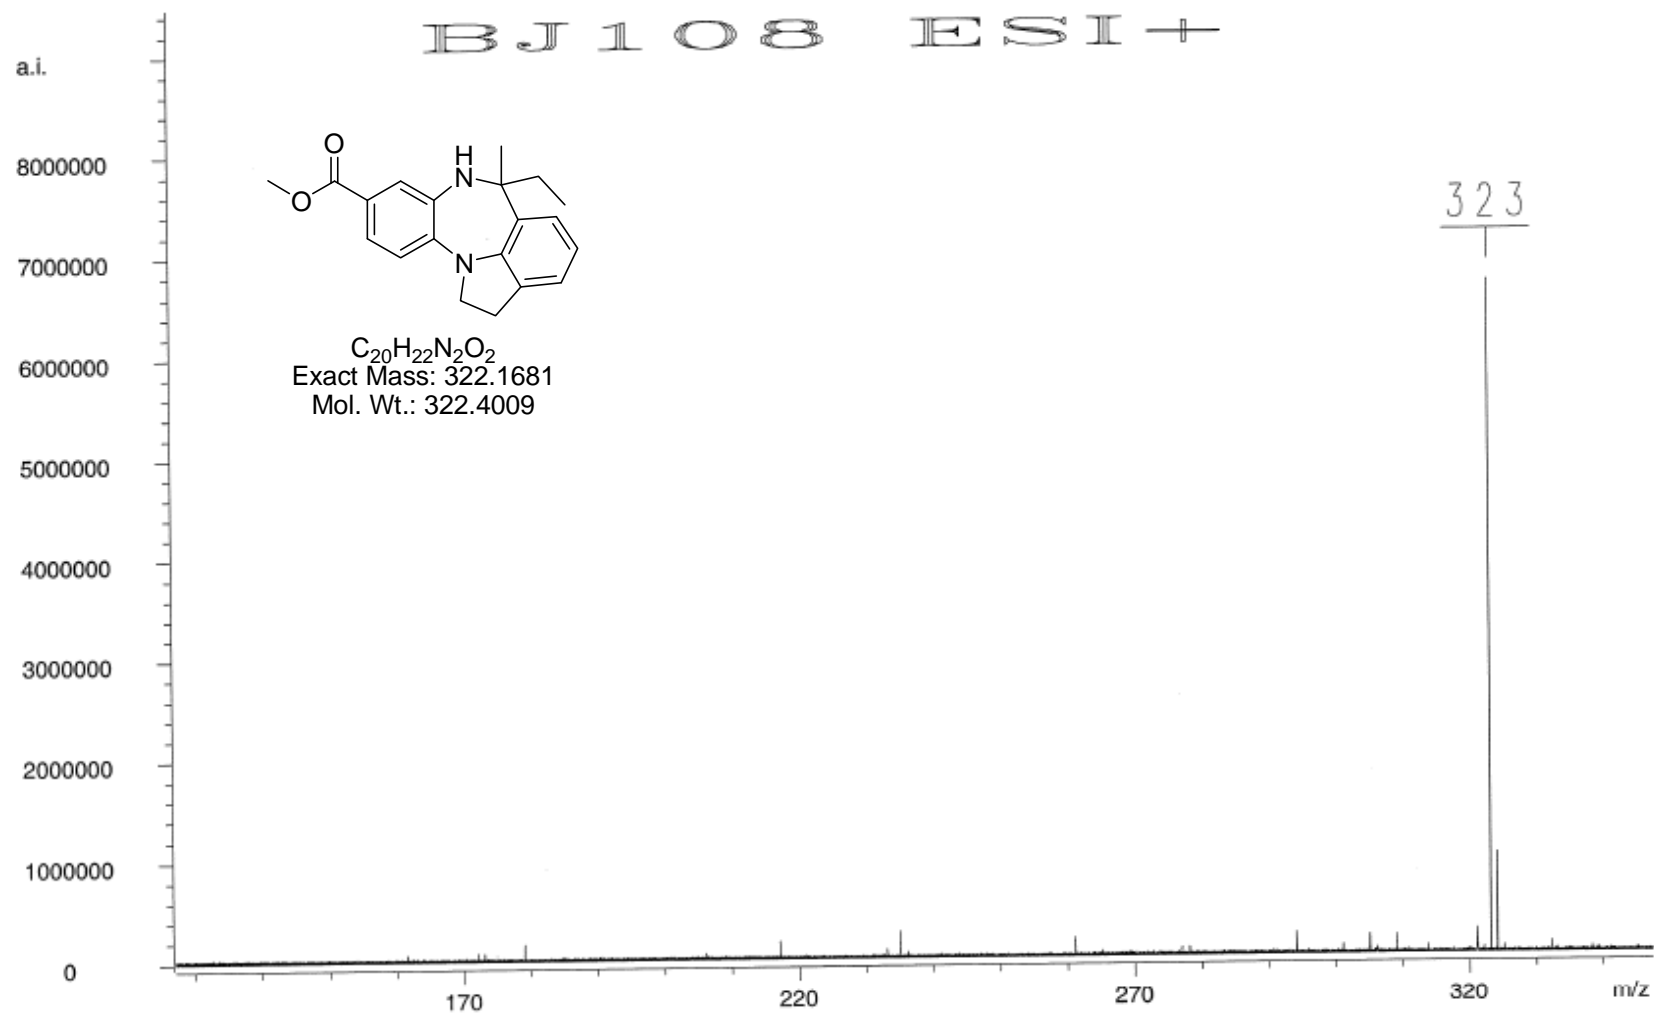

Low Resolution Mass Spectrum (LRMS) of compound **4b**

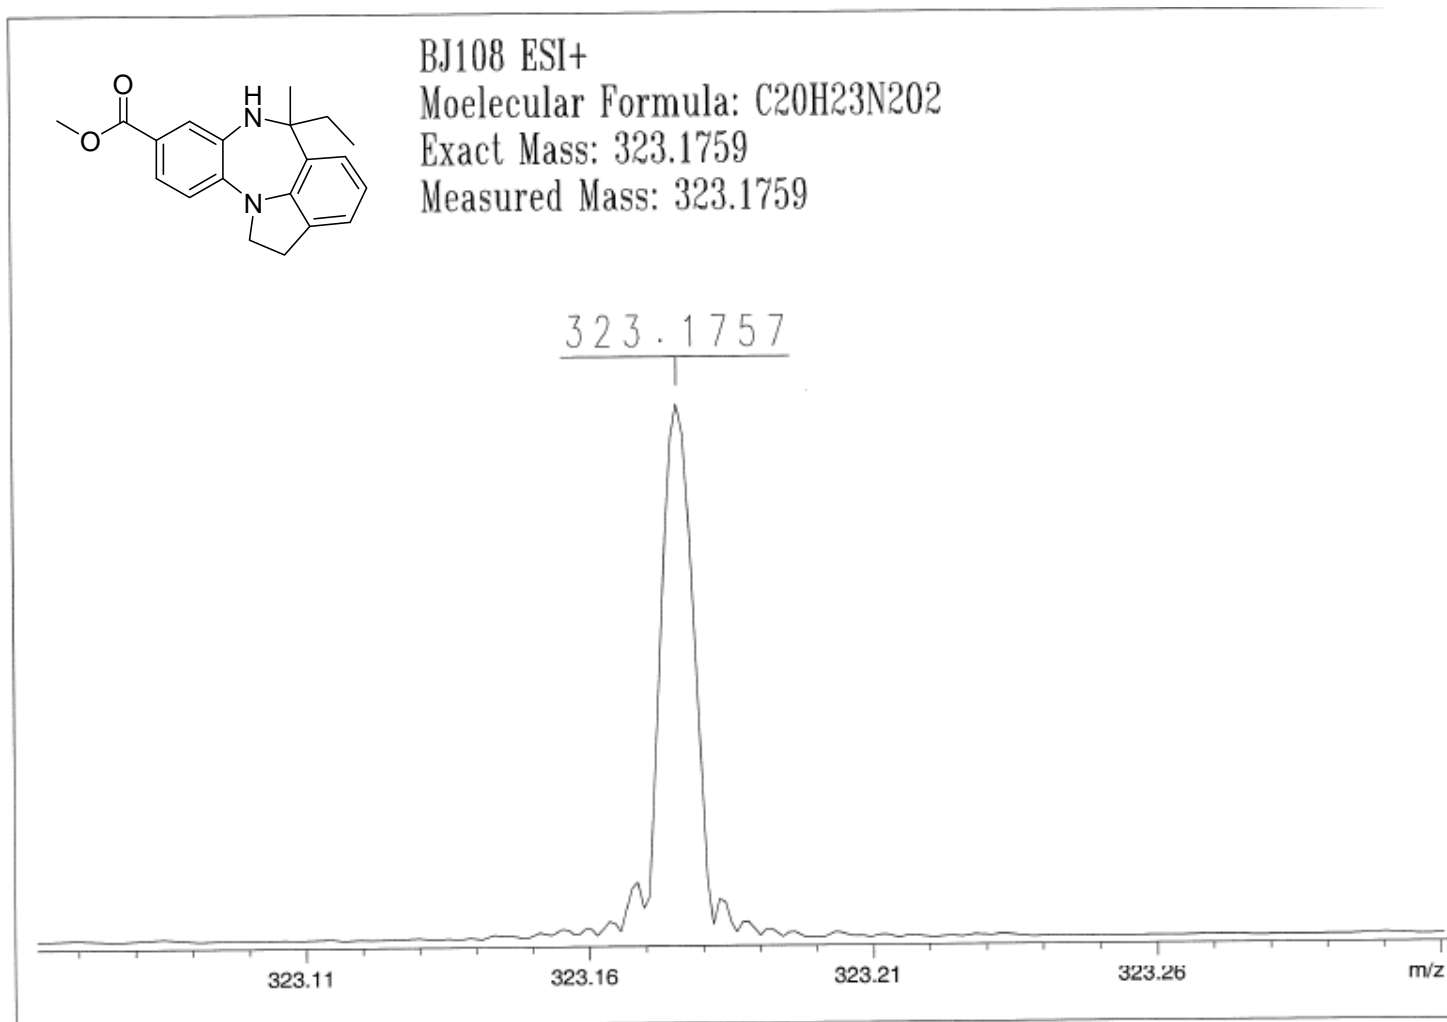

High Resolution Mass Spectrum (HRMS) of compound **4b**



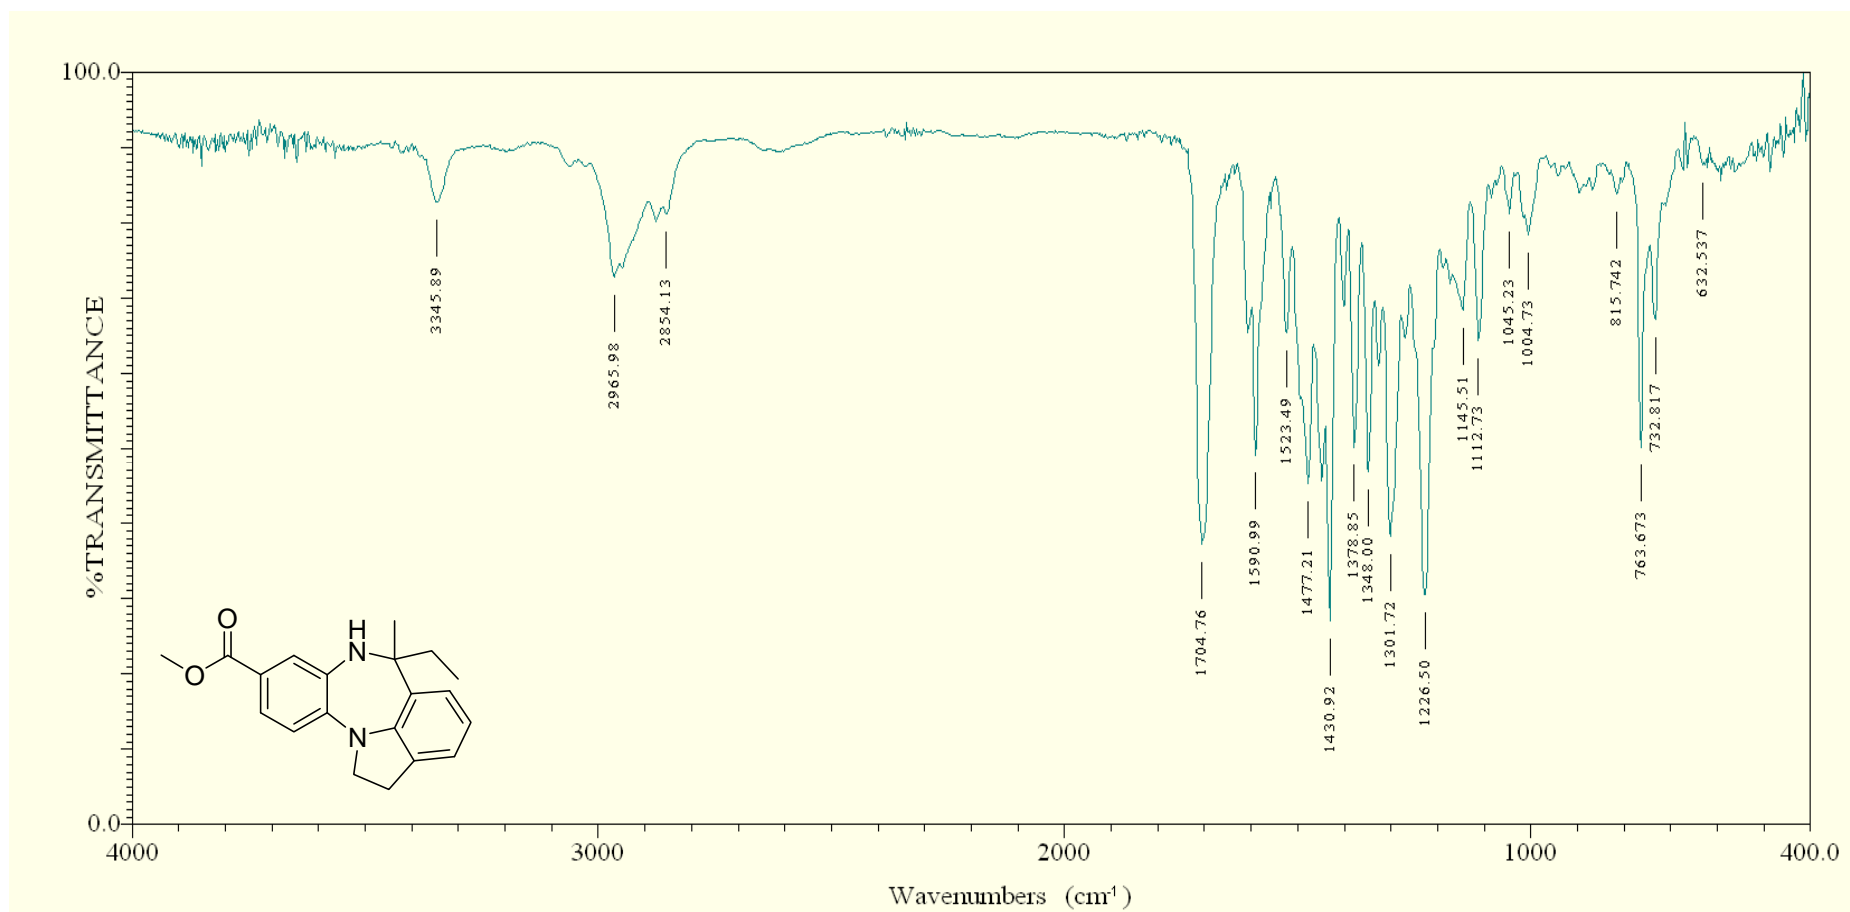

IR Spectrum of compound **4b** (Neat)

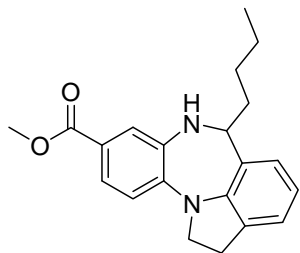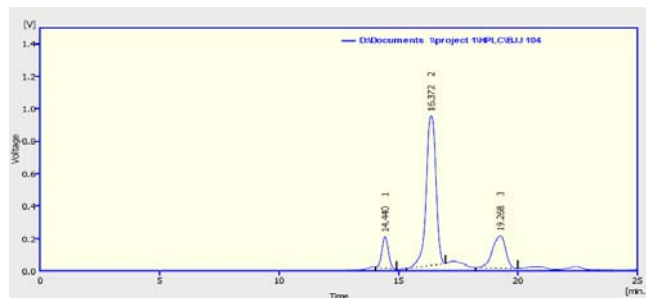

|       | Reten. Time [min] | Area [mV.s] | Height [mV] | Area [%] | Height [%] | W05 [min] |
|-------|-------------------|-------------|-------------|----------|------------|-----------|
| 1     | 14.440            | 3659.877    | 195.095     | 9.6      | 14.8       | 0.30      |
| 2     | 16.372            | 26113.331   | 921.515     | 69.6     | 70.0       | 0.43      |
| 3     | 19.268            | 7644.807    | 199.610     | 20.4     | 15.2       | 0.61      |
| Total |                   | 37418.015   | 1316.220    | 100.0    | 100.0      |           |

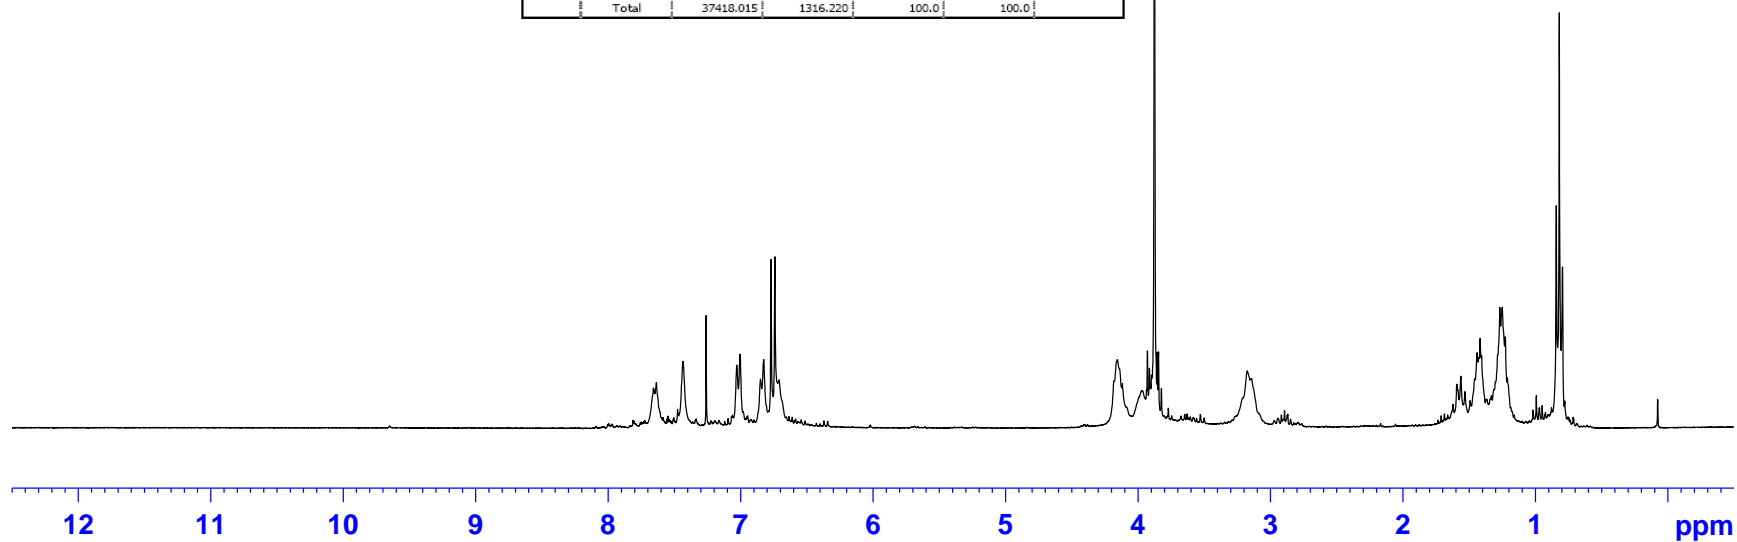

HPLC and <sup>1</sup>H NMR Spectrum (300 MHz) of compound **4c** in CDCl<sub>3</sub>

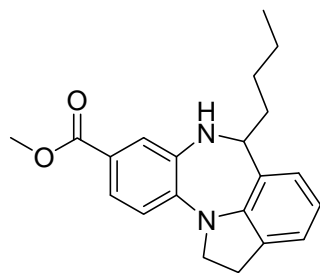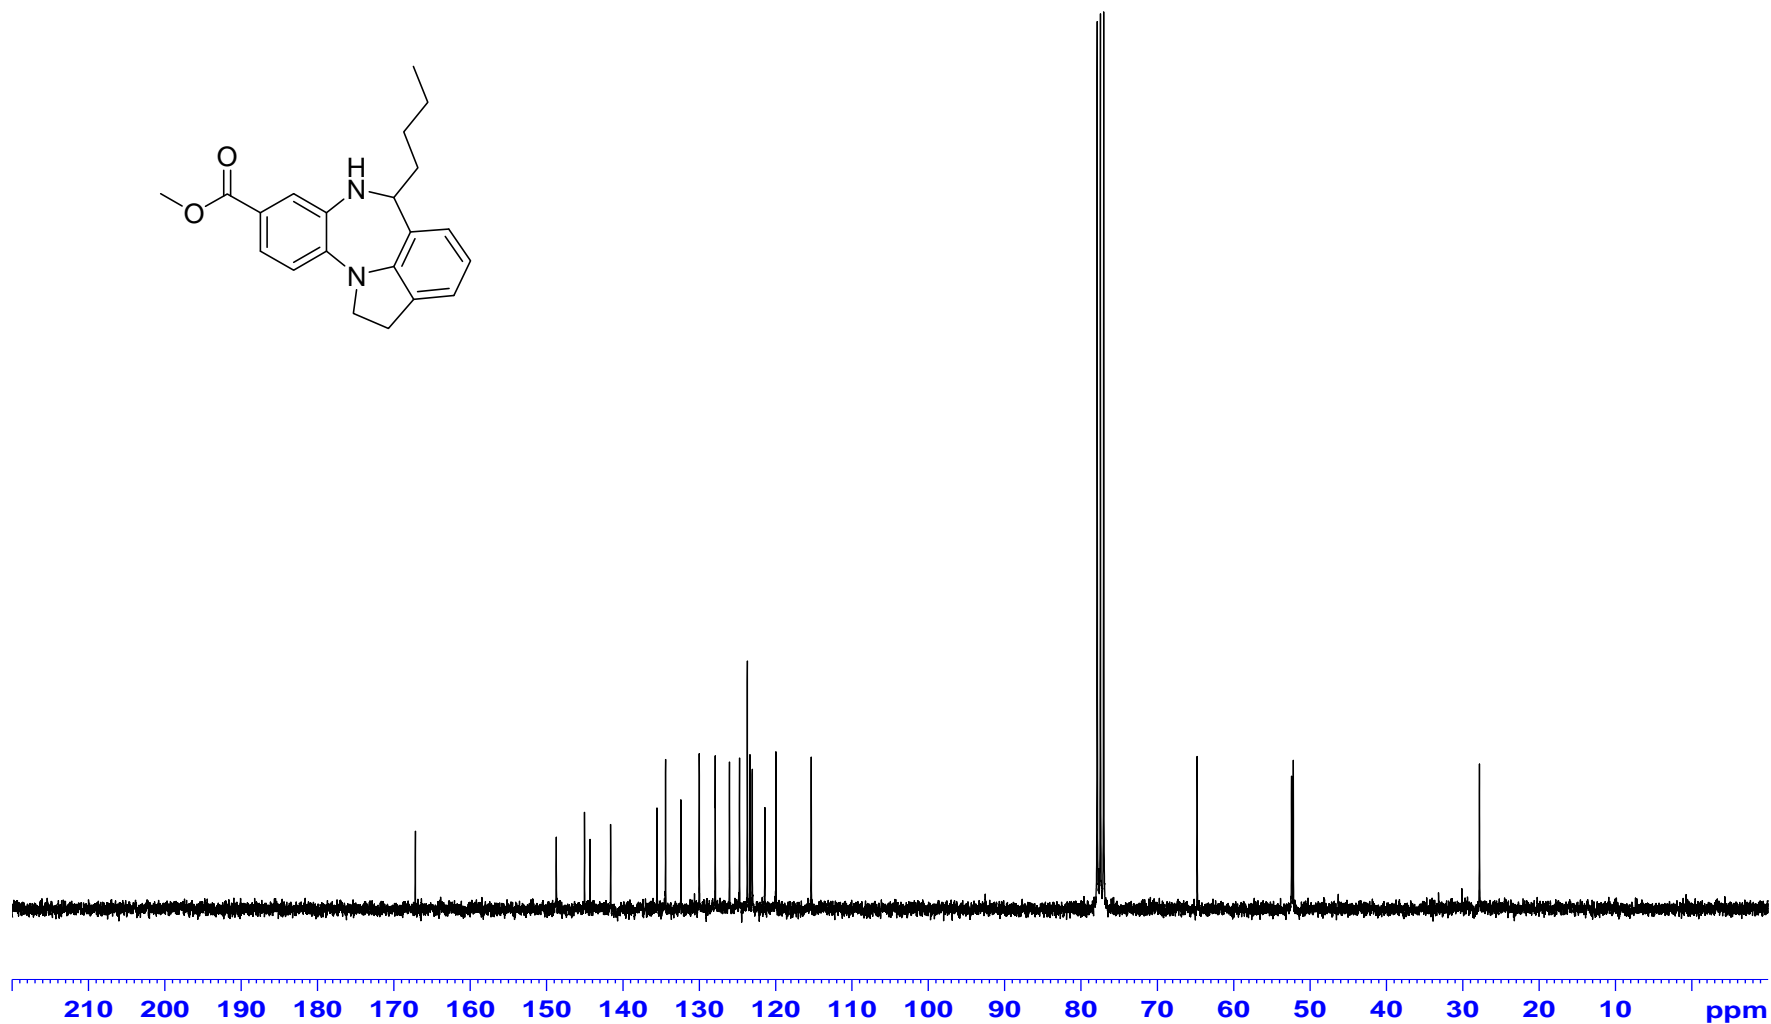

$^{13}\text{C}$  NMR Spectrum (75 MHz) of compound **4c** in  $\text{CDCl}_3$

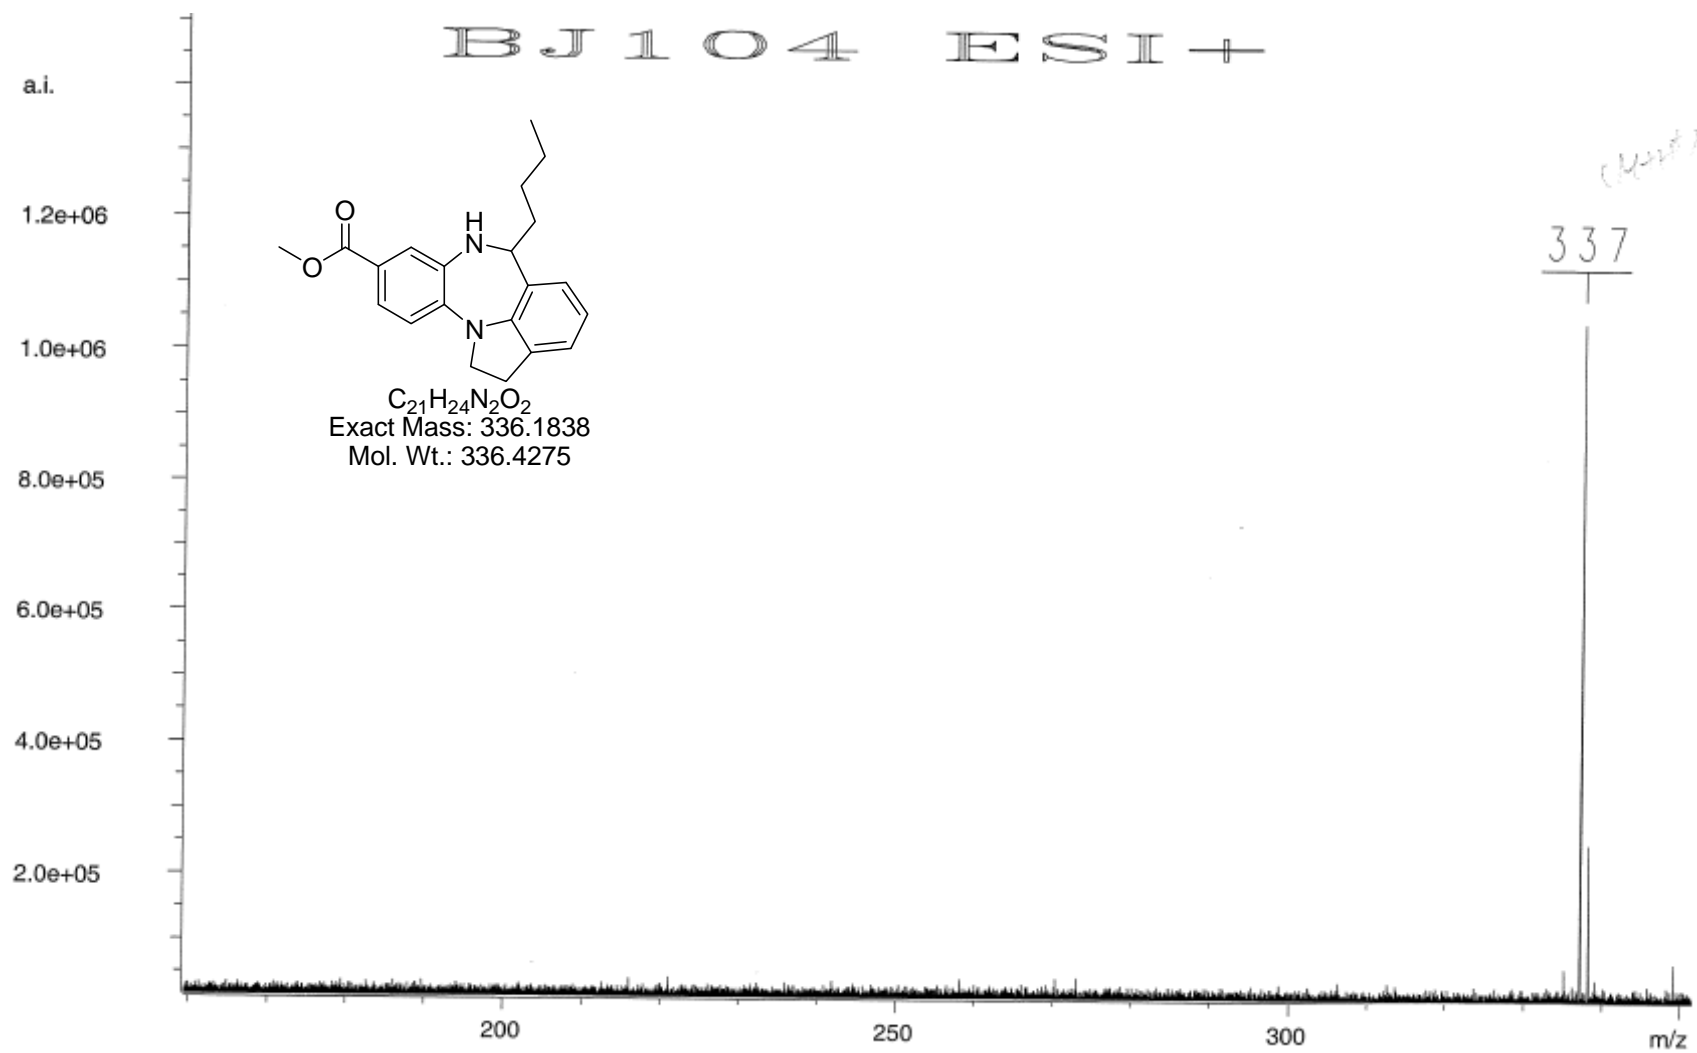

Low Resolution Mass Spectrum (LRMS) of compound 4c

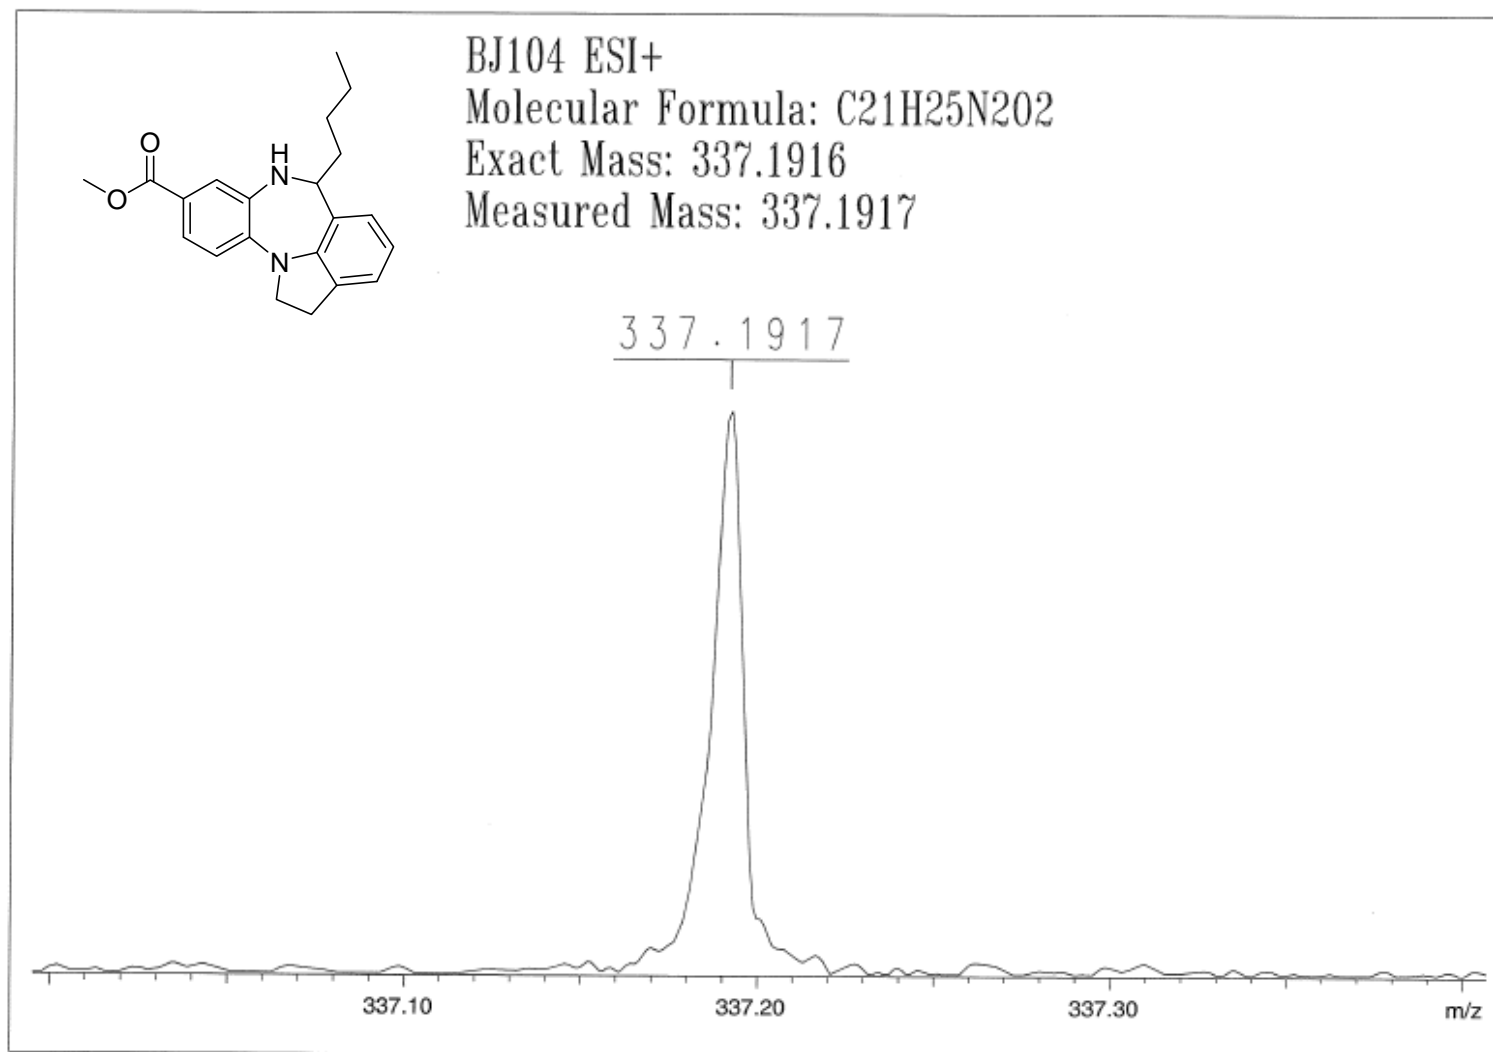

High Resolution Mass Spectrum (HRMS) of compound **4c**

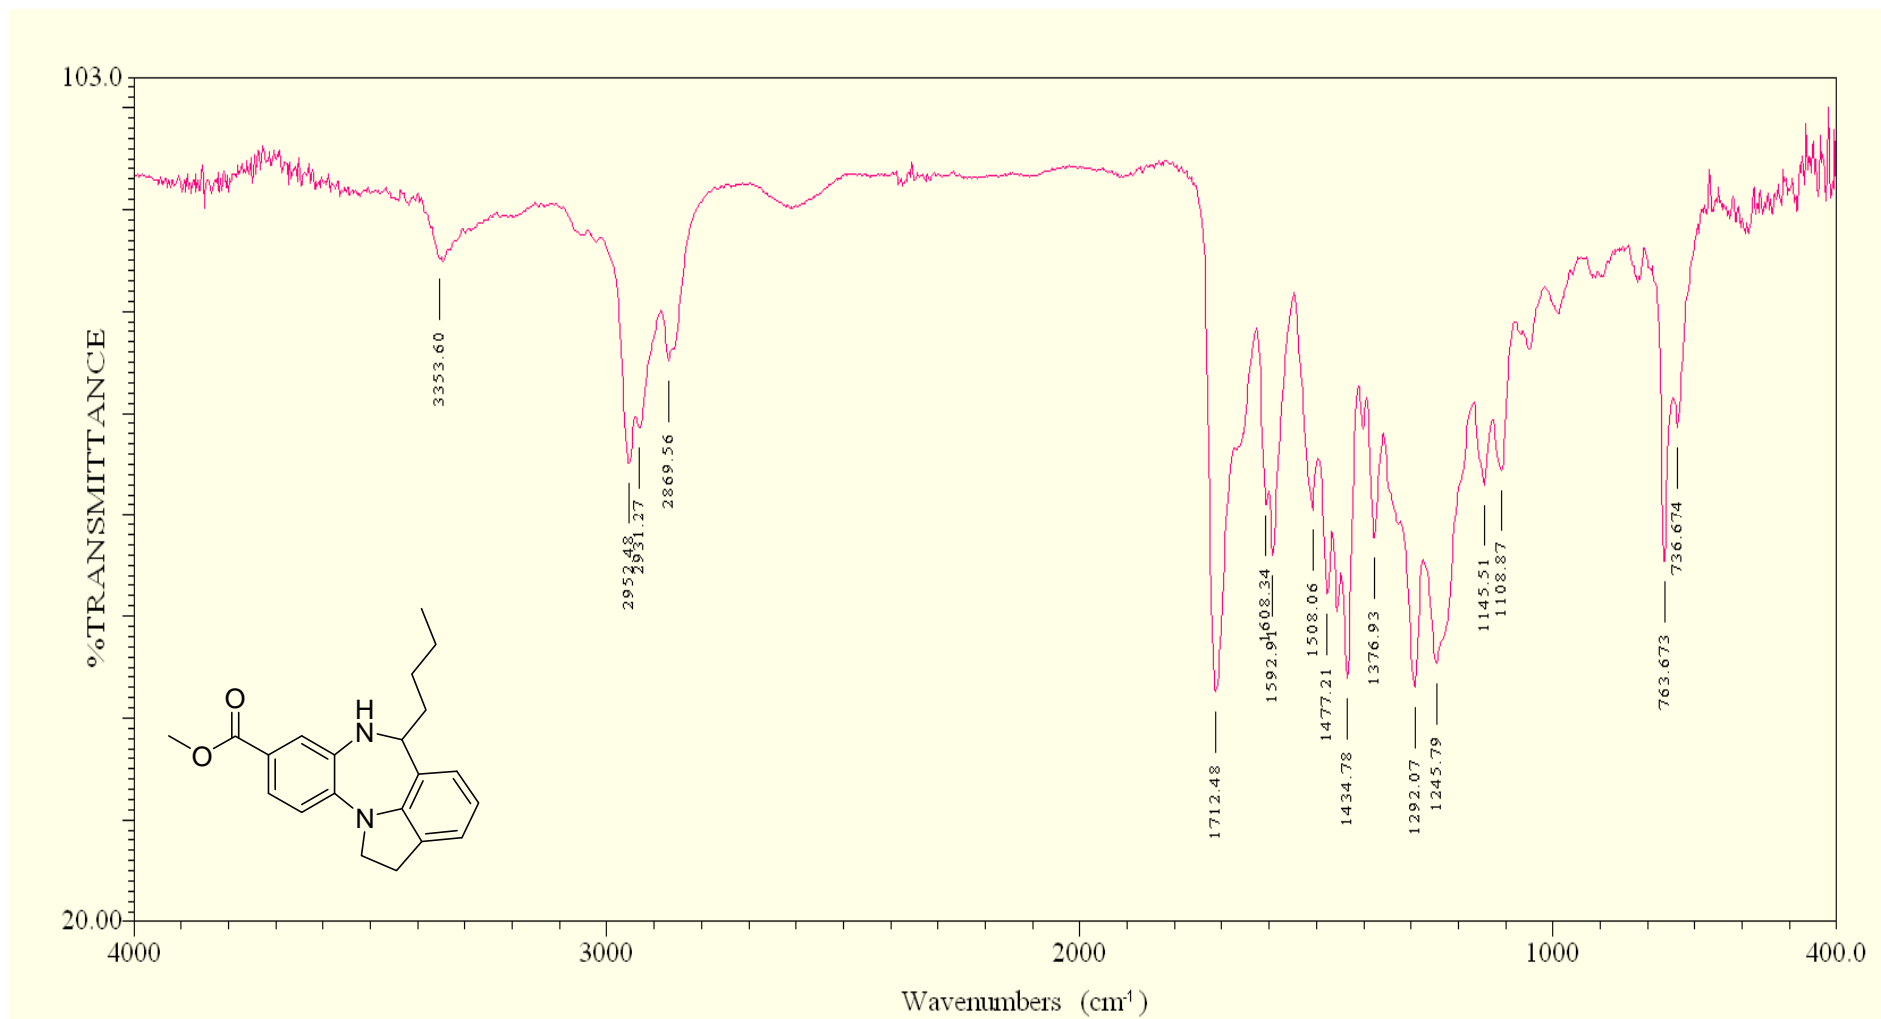

IR Spectrum of compound **4c** (Neat)

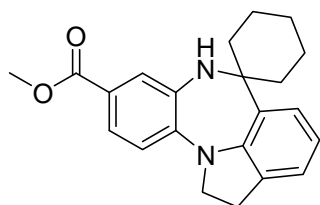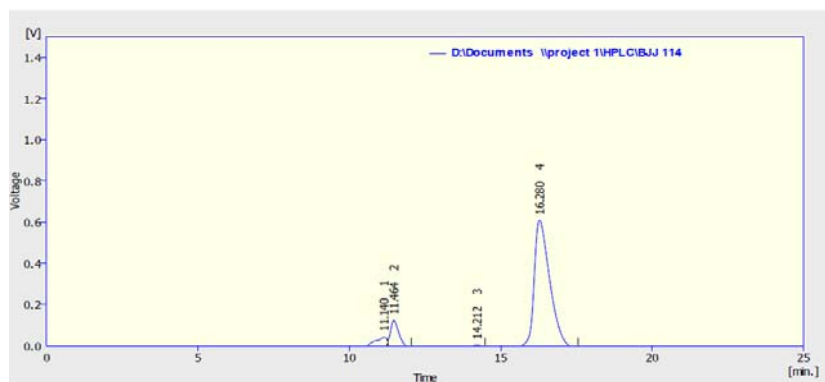

|       | Reten. Time [min] | Area [mV.s] | Height [mV] | Area [%] | Height [%] | W05 [min] |
|-------|-------------------|-------------|-------------|----------|------------|-----------|
| 1     | 11.140            | 1436.848    | 51.650      | 5.4      | 6.3        | 0.54      |
| 2     | 11.464            | 2621.230    | 131.925     | 9.9      | 16.2       | 0.31      |
| 3     | 14.212            | 220.583     | 12.226      | 0.8      | 1.5        | 0.30      |
| 4     | 16.280            | 22218.440   | 619.751     | 83.9     | 76.0       | 0.54      |
| Total |                   | 26497.102   | 815.553     | 100.0    | 100.0      |           |

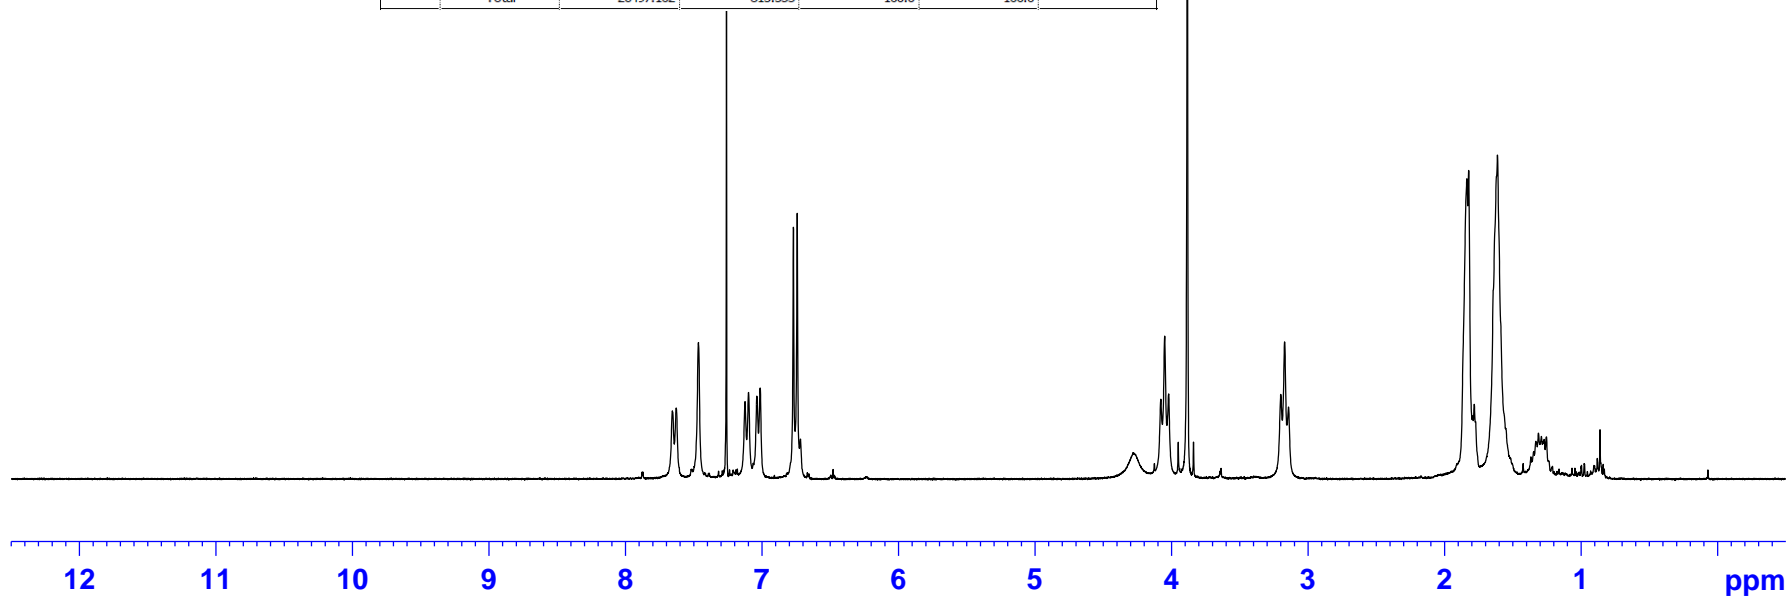

HPLC and <sup>1</sup>H NMR Spectrum (300 MHz) of compound **4d** in CDCl<sub>3</sub>

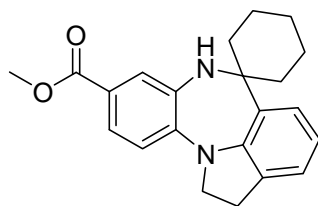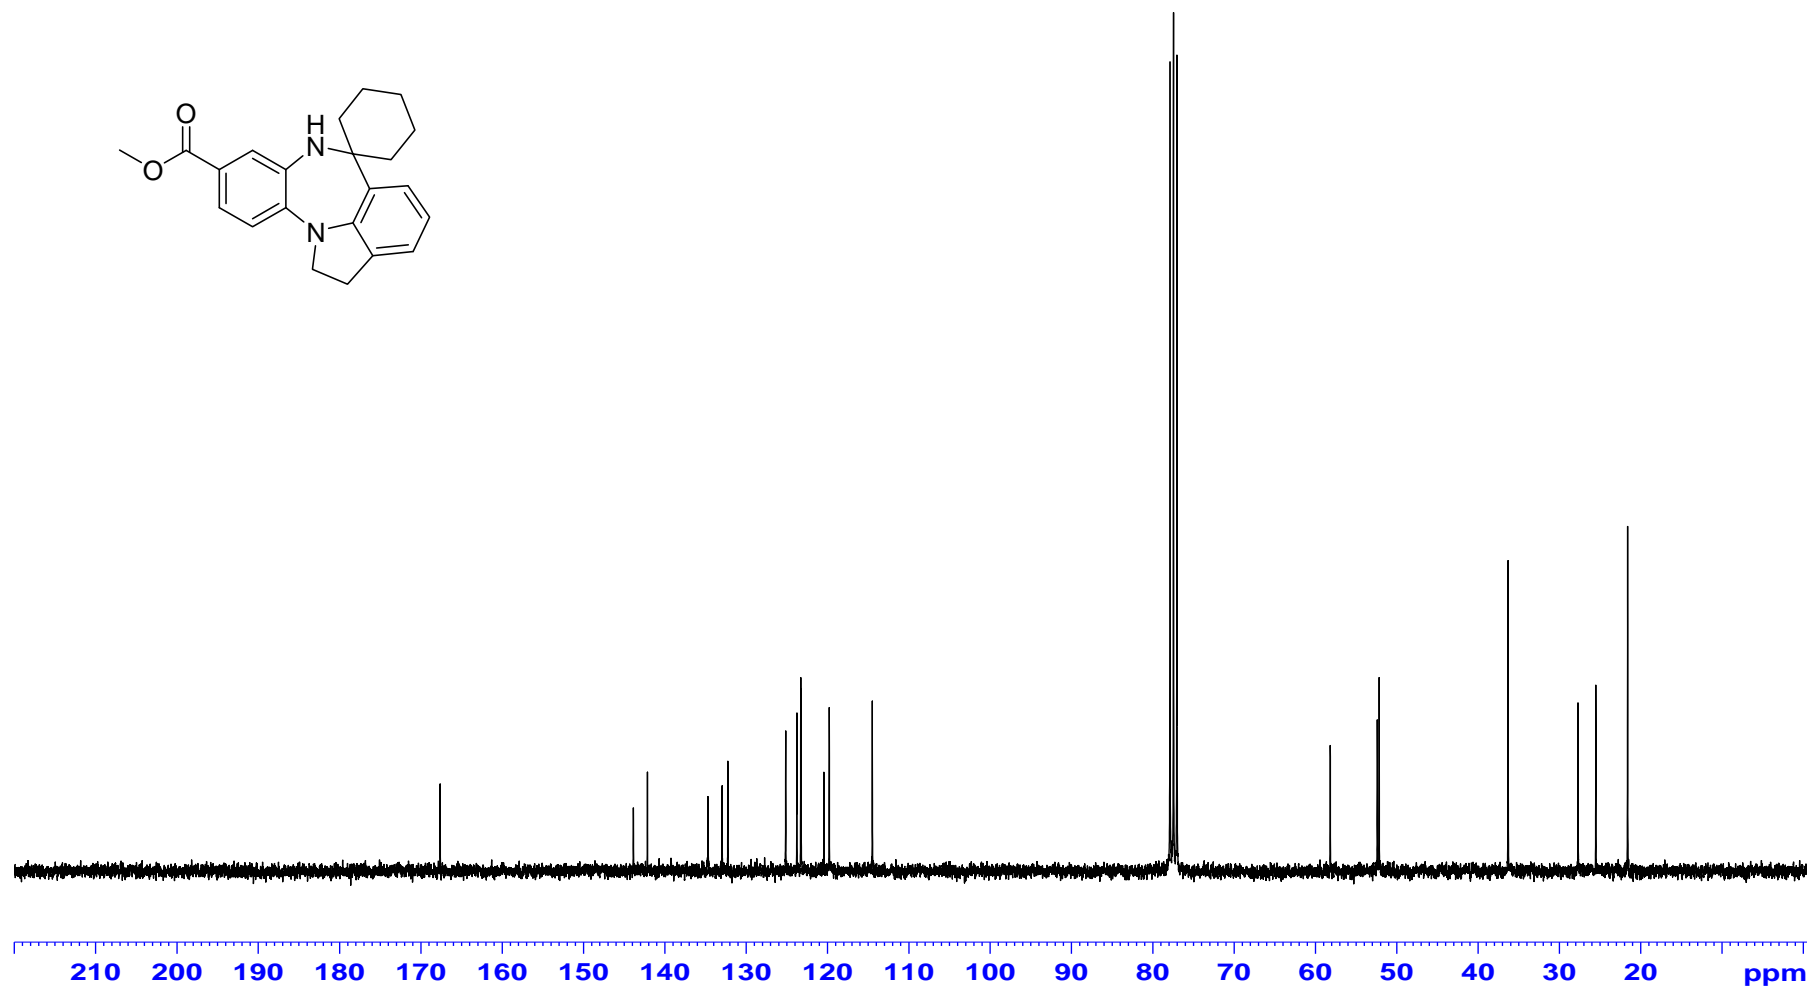

<sup>13</sup>C NMR Spectrum (75 MHz) of compound **4d** in CDCl<sub>3</sub>



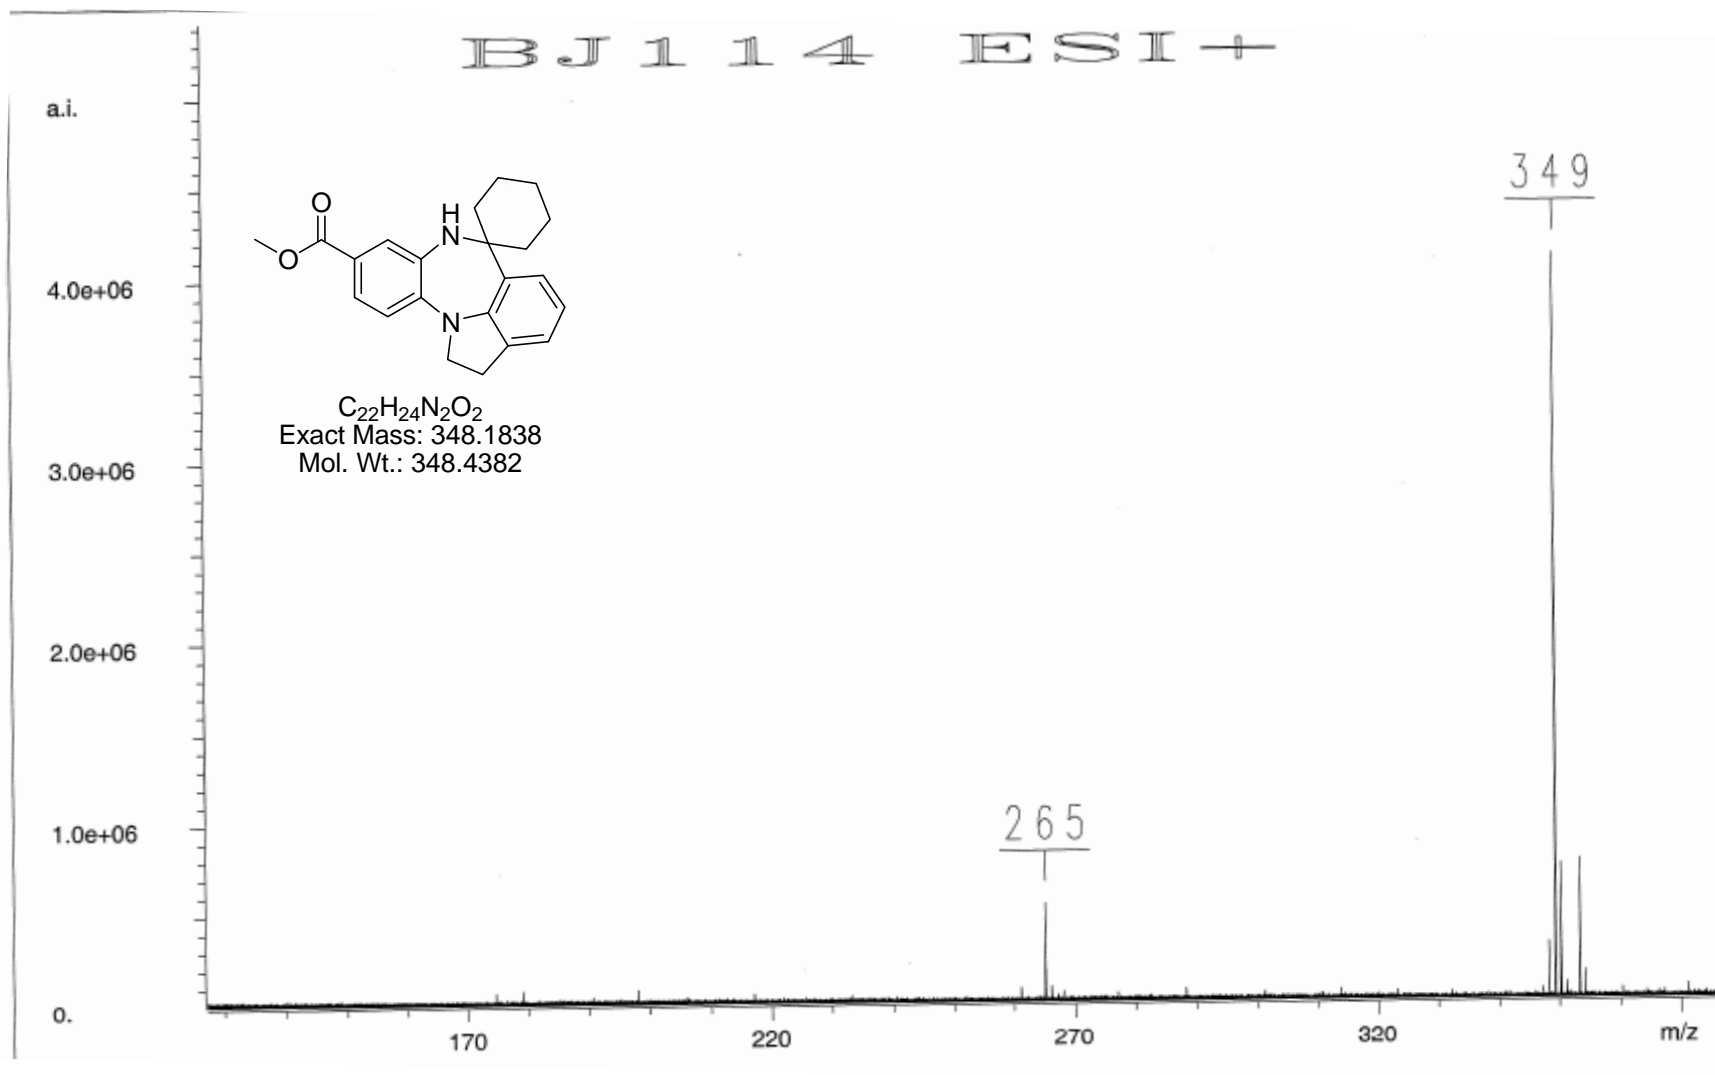

Low Resolution Mass Spectrum (LRMS) of compound **4d**

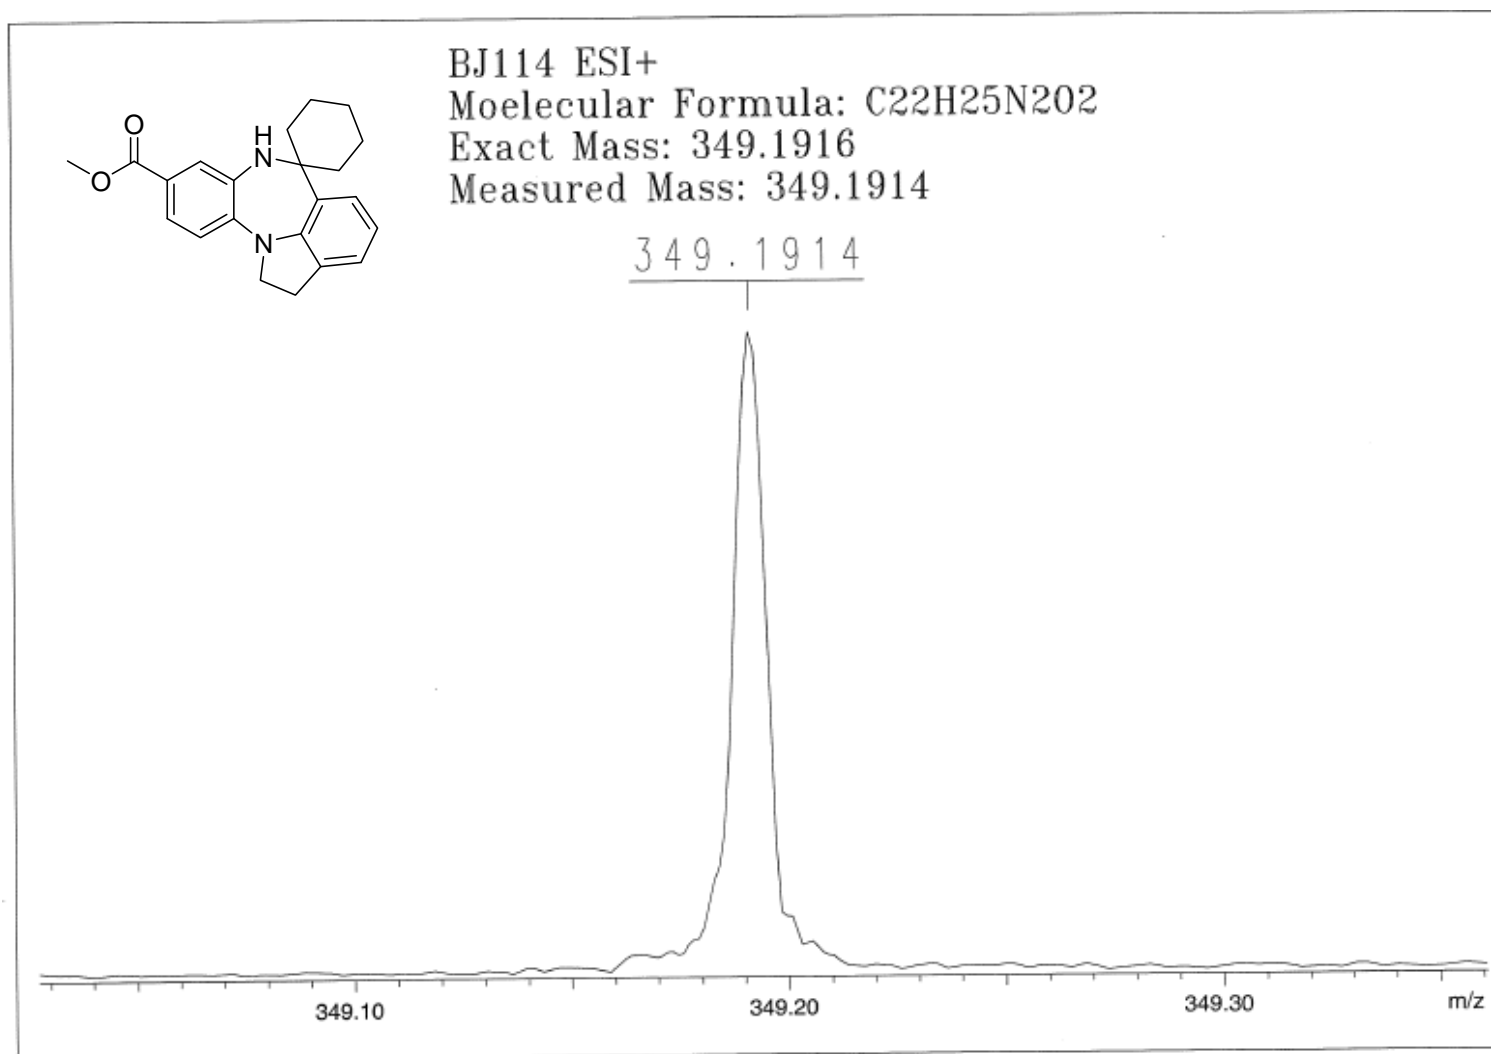

High Resolution Mass Spectrum (HRMS) of compound **4d**

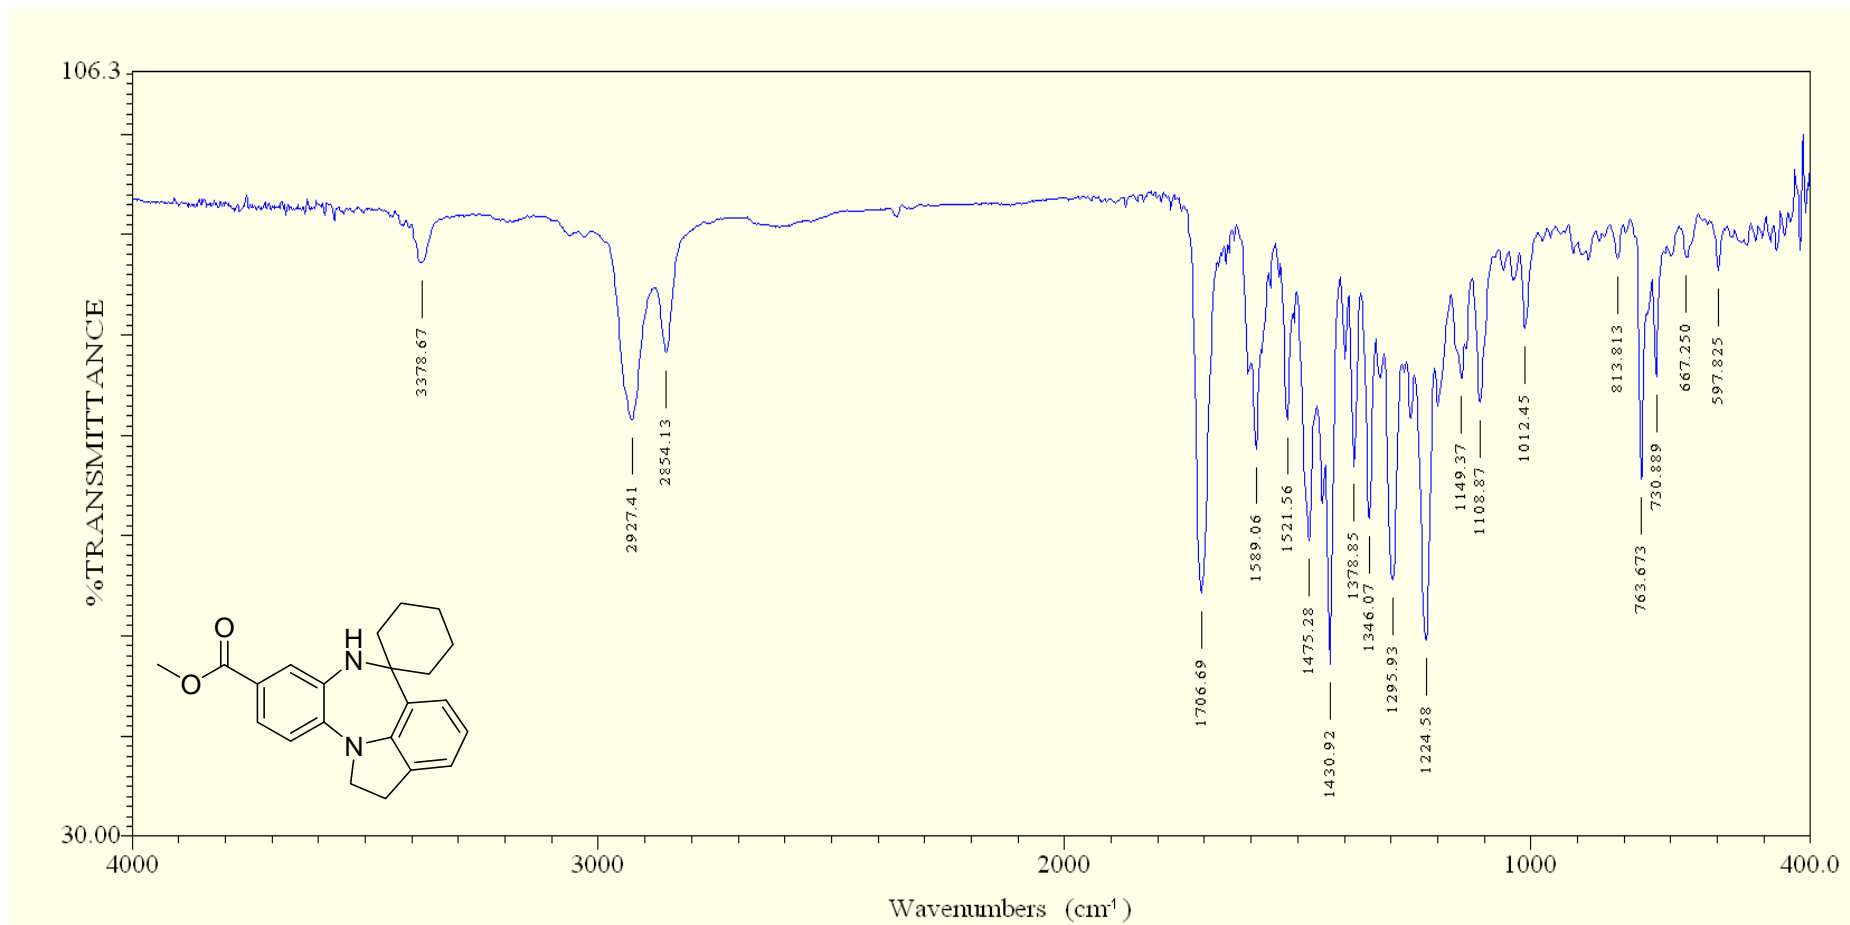

IR Spectrum of compound 4d (Neat)

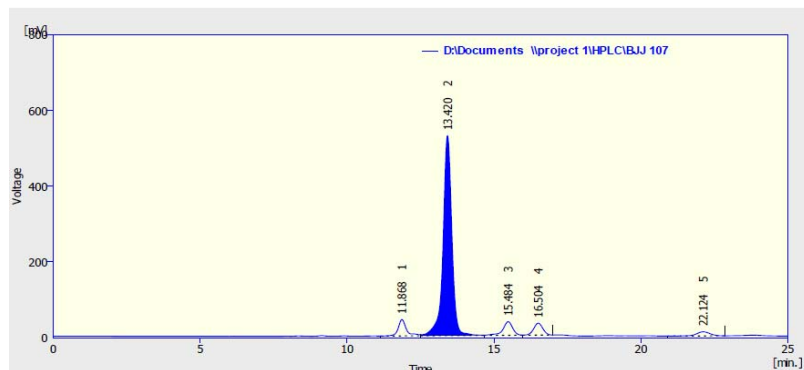

|   | Reten. Time [min] | Area [mV.s] | Height [mV] | Area [%] | Height [%] | W05 [min] |
|---|-------------------|-------------|-------------|----------|------------|-----------|
| 1 | 11.868            | 845.311     | 43.239      | 6.2      | 6.7        | 0.26      |
| 2 | 13.420            | 10990.925   | 528.279     | 80.2     | 81.3       | 0.30      |
| 3 | 15.484            | 837.078     | 36.017      | 6.1      | 5.5        | 0.33      |
| 4 | 16.504            | 683.093     | 31.525      | 5.0      | 4.8        | 0.34      |
| 5 | 22.124            | 350.833     | 10.997      | 2.6      | 1.7        | 0.49      |
|   | Total             | 13707.240   | 650.058     | 100.0    | 100.0      |           |

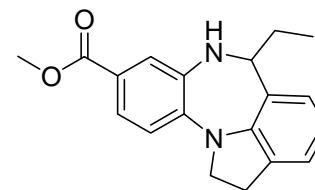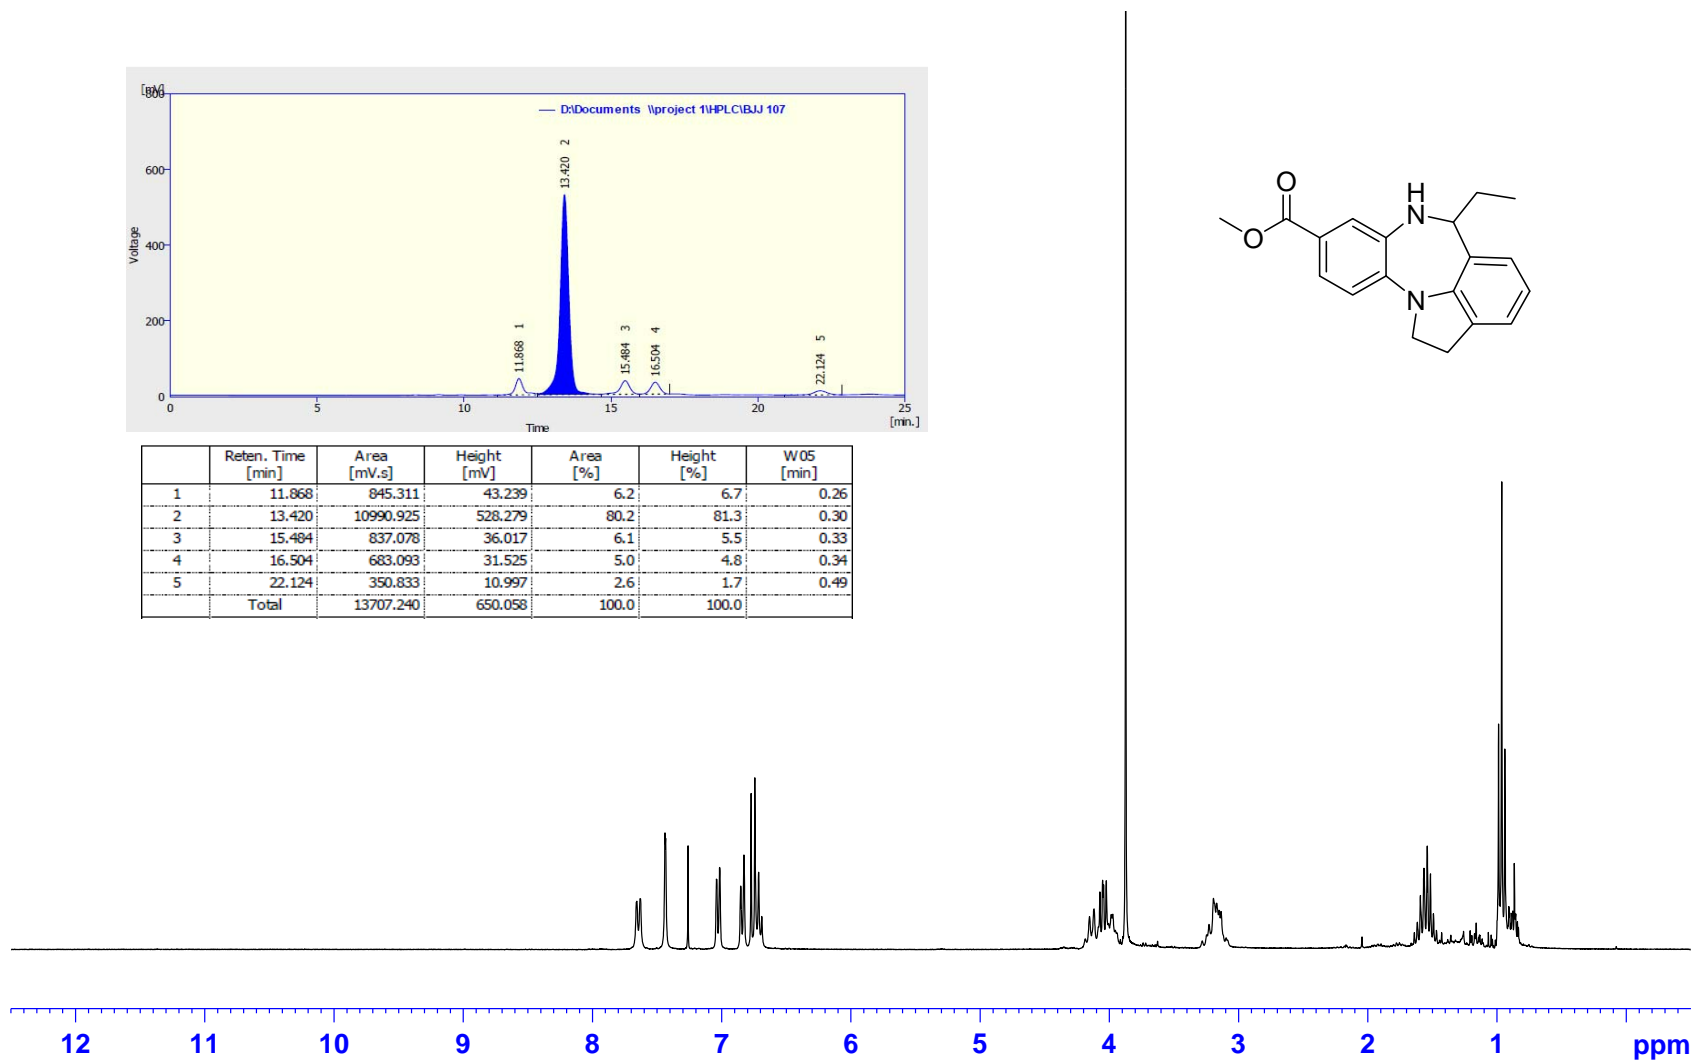

HPLC and  $^1\text{H}$  NMR Spectrum (300 MHz) of compound **4e** in  $\text{CDCl}_3$

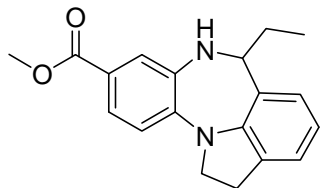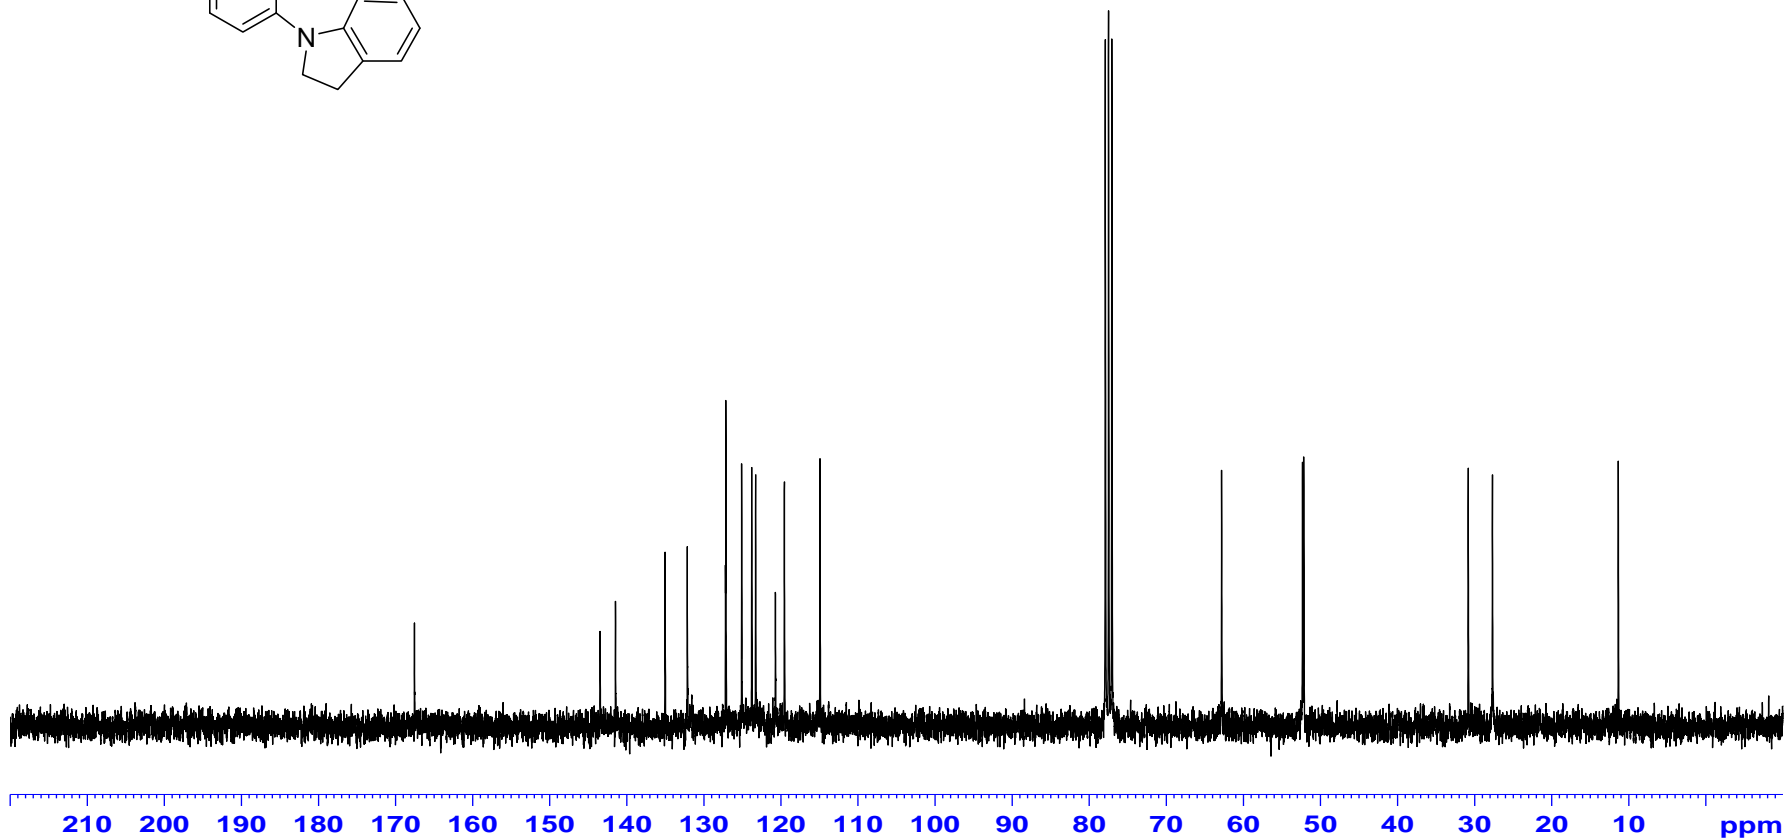

<sup>13</sup>C NMR Spectrum (75 MHz) of compound **4e** in CDCl<sub>3</sub>

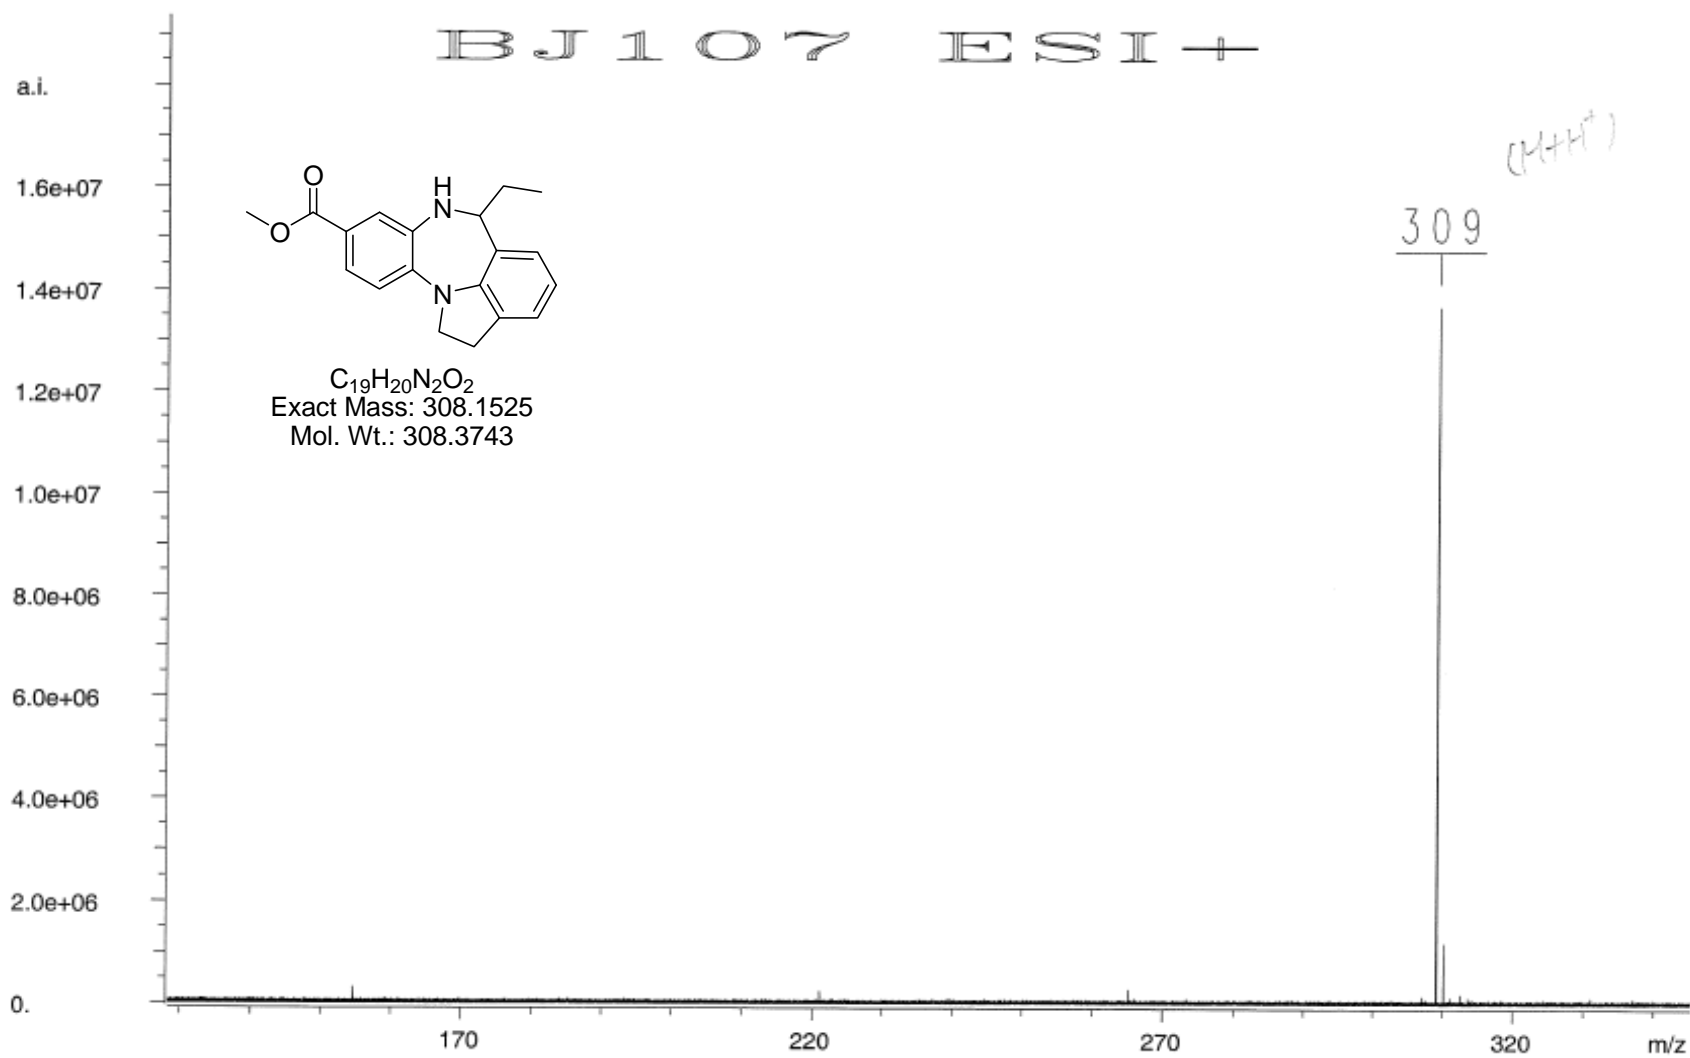

Low Resolution Mass Spectrum (LRMS) of compound **4e**

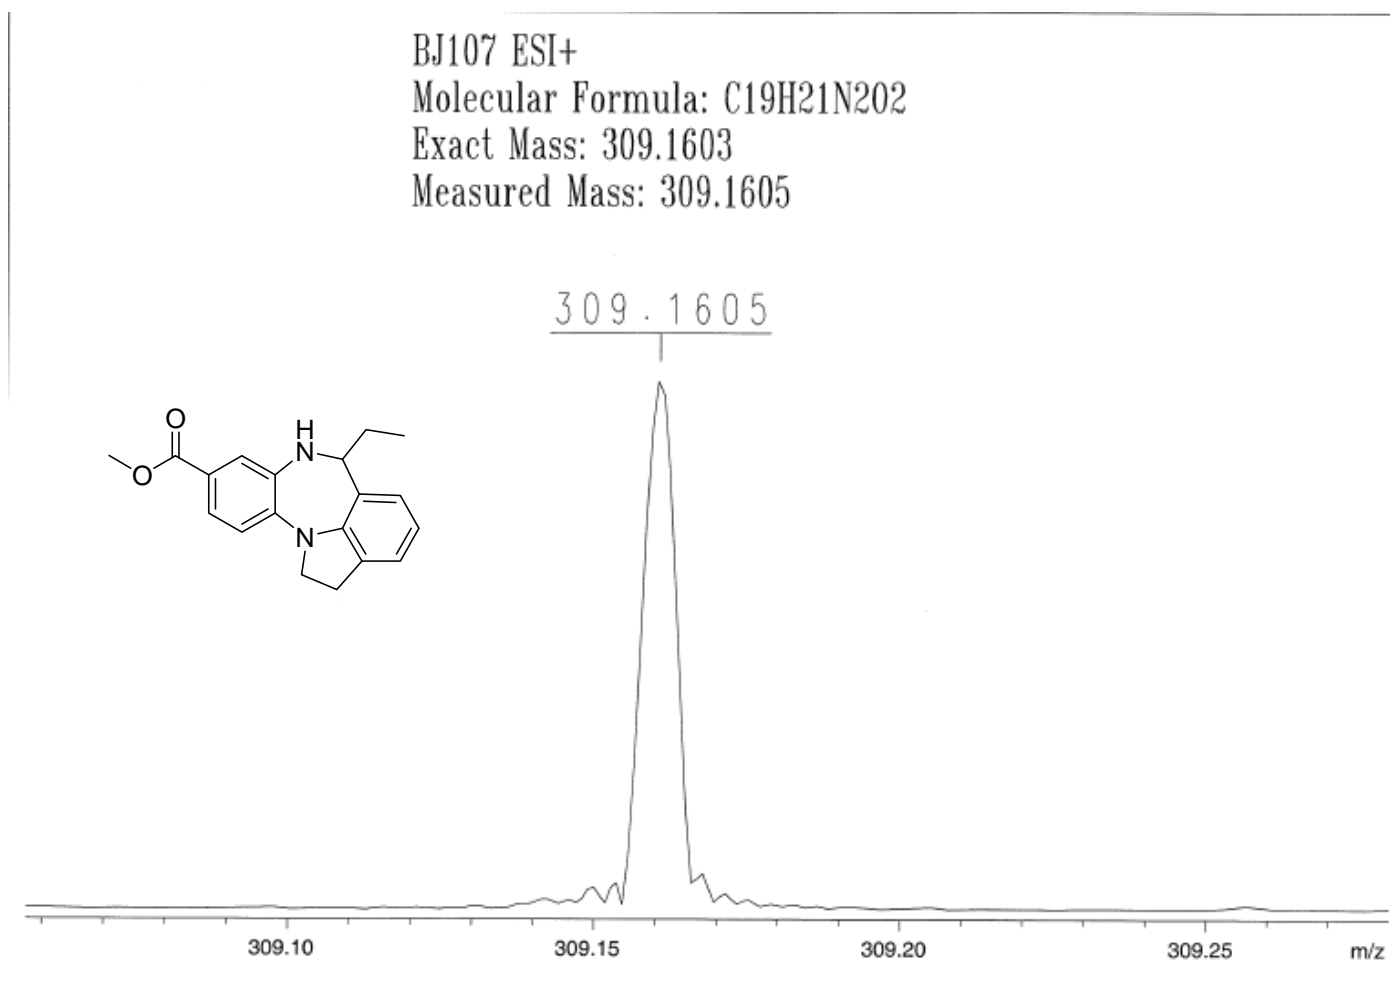

High Resolution Mass Spectrum (HRMS) of compound **4e**

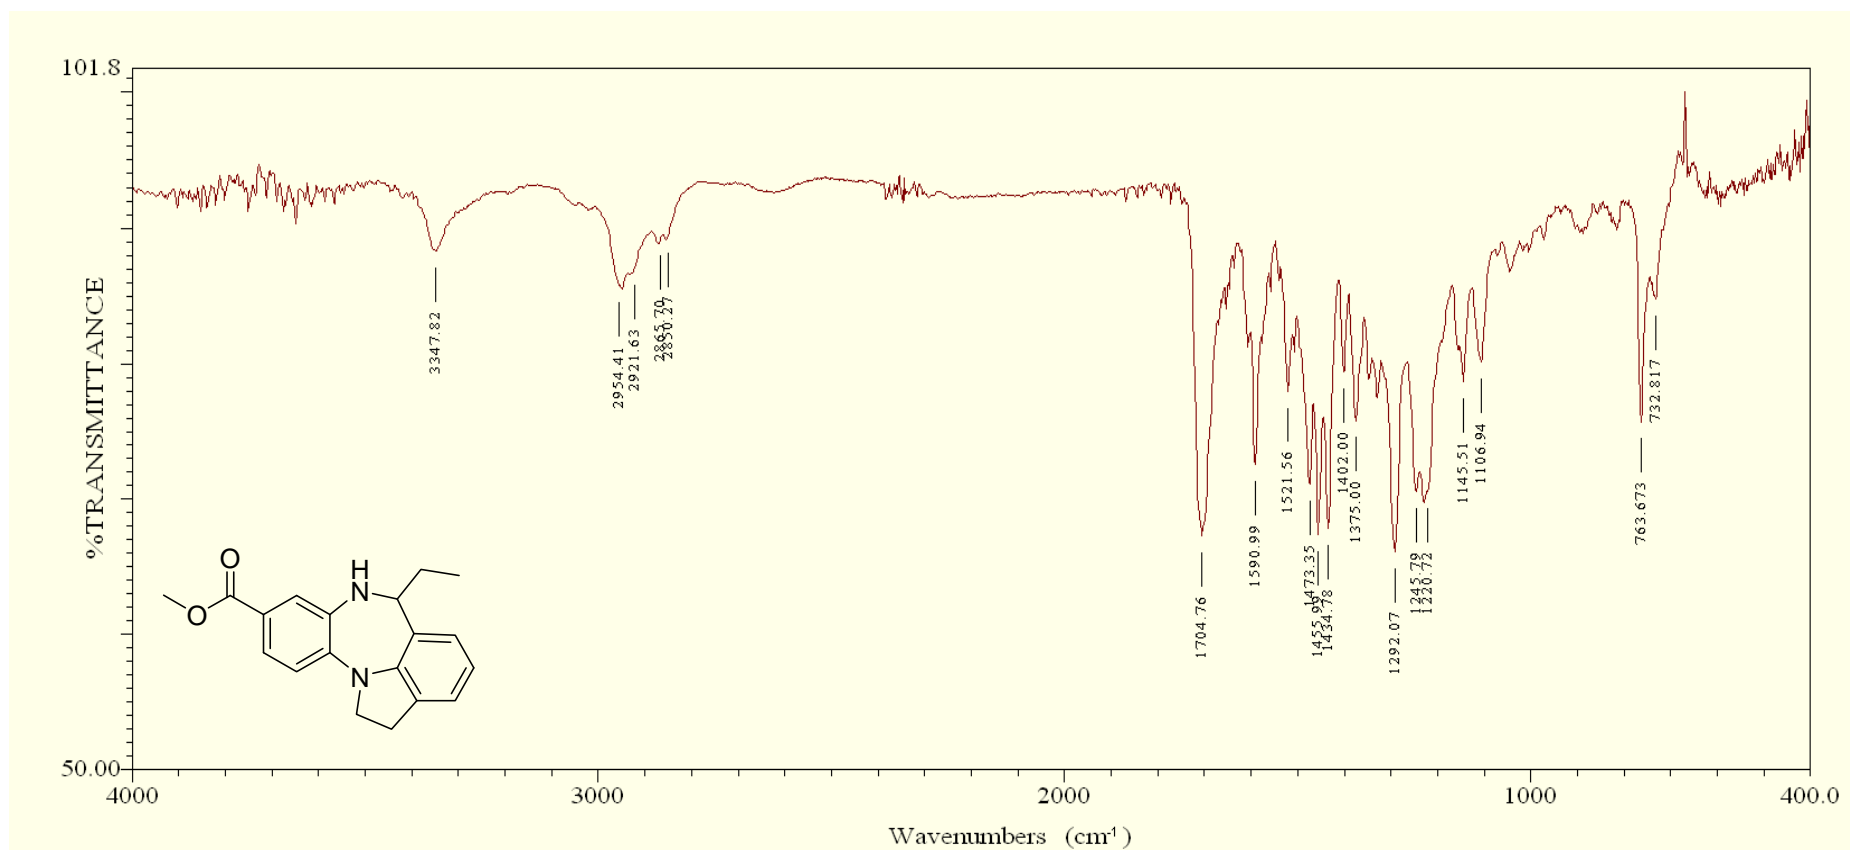

IR Spectrum of compound **4e** (Neat)



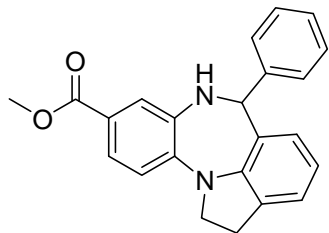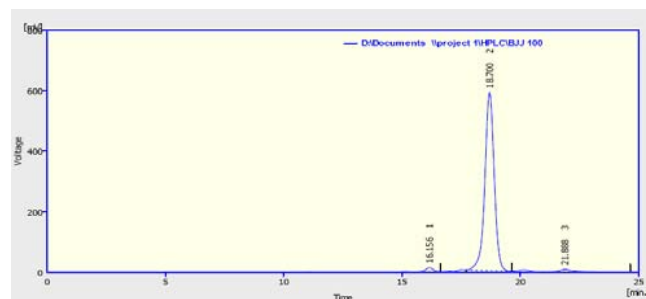

|       | Reten. Time [min] | Area [mV.s] | Height [mV] | Area [%] | Height [%] | W05 [min] |
|-------|-------------------|-------------|-------------|----------|------------|-----------|
| 1     | 16.156            | 298.760     | 13.765      | 1.8      | 2.3        | 0.34      |
| 2     | 18.700            | 16252.775   | 588.165     | 96.2     | 96.4       | 0.42      |
| 3     | 21.888            | 339.144     | 7.886       | 2.0      | 1.3        | 0.52      |
| Total |                   | 16890.679   | 609.816     | 100.0    | 100.0      |           |

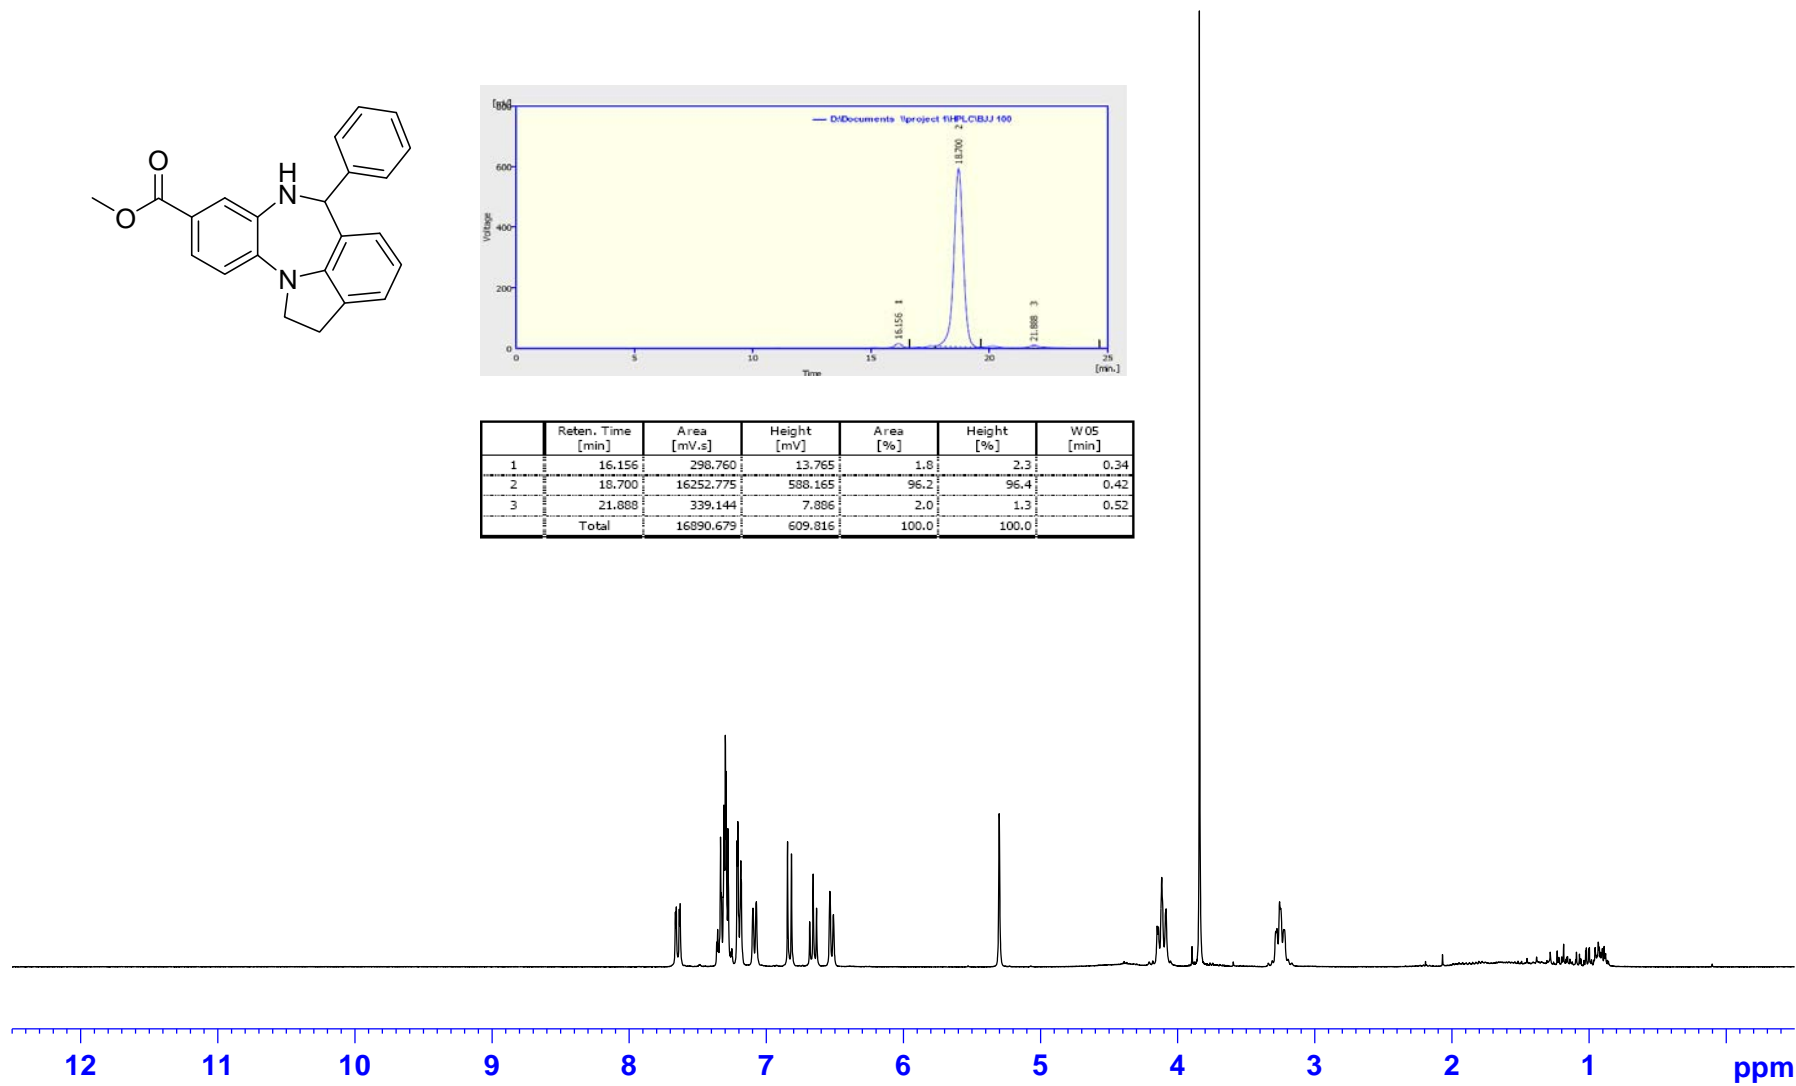

HPLC and  $^1\text{H}$  NMR Spectrum (300 MHz) of compound **4f** in  $\text{CDCl}_3$

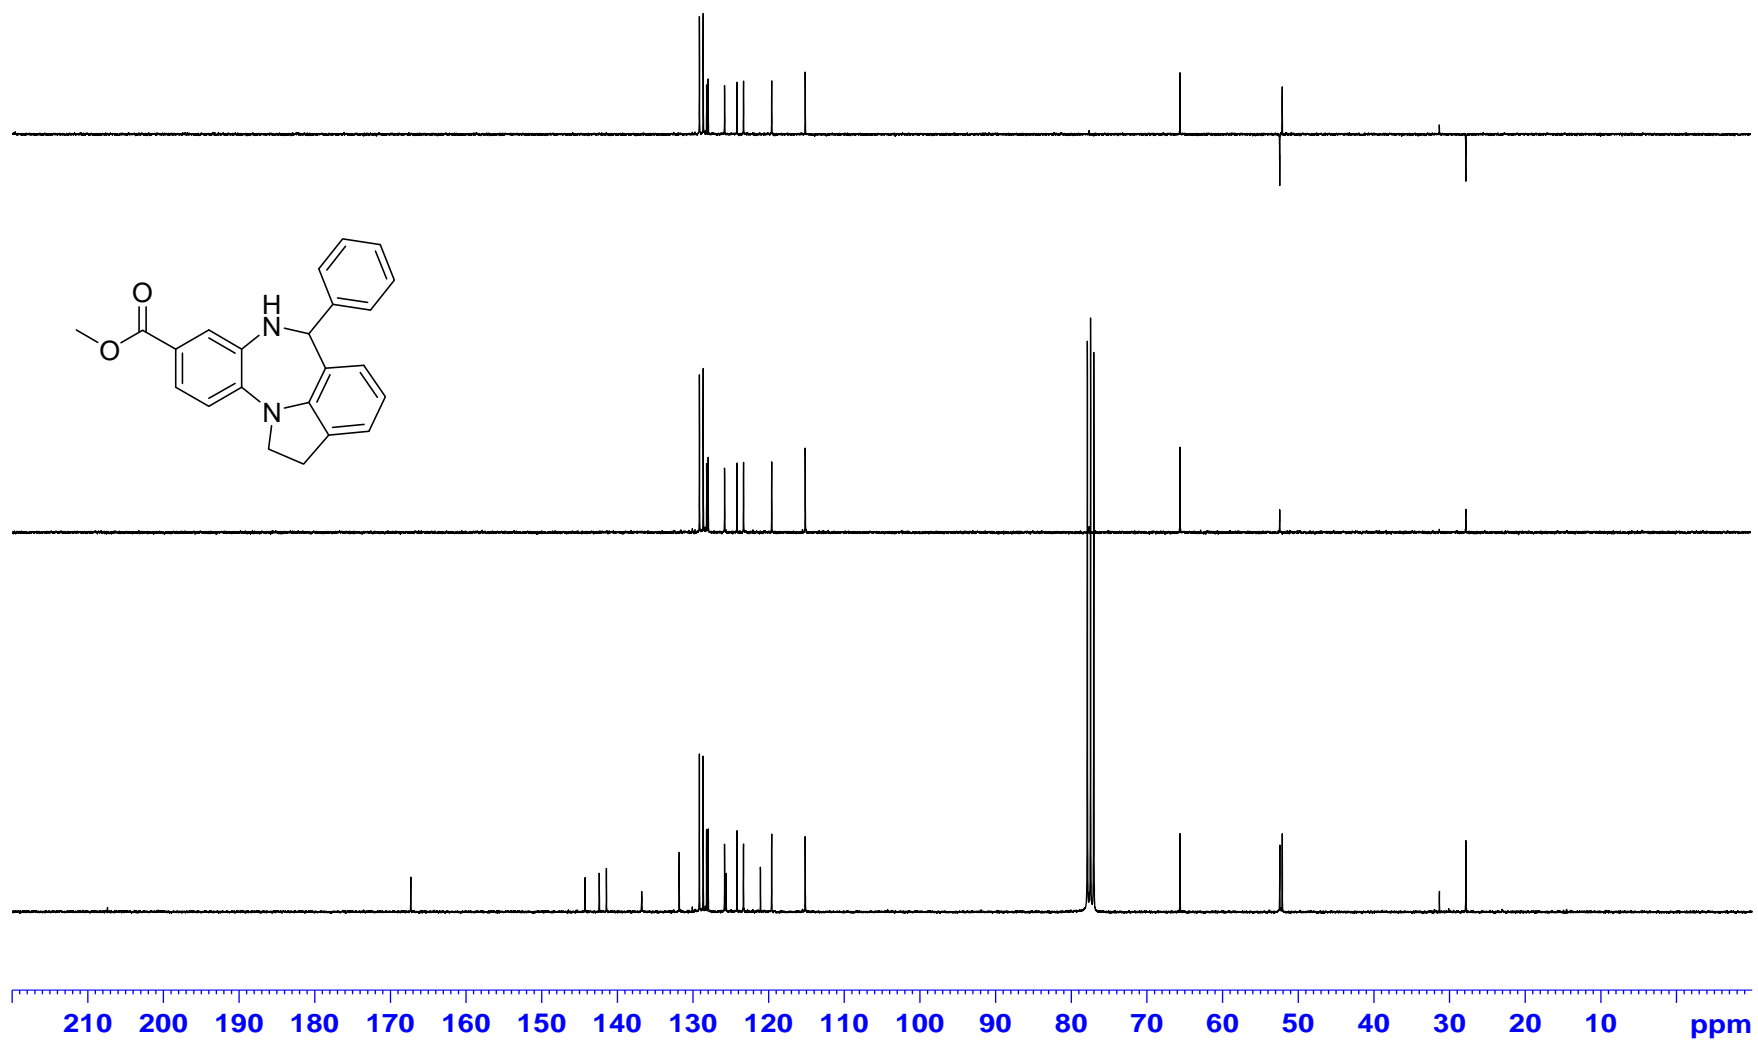

$^{13}\text{C}$ , DEPT NMR Spectrum (75 MHz) of compound **4f** in  $\text{CDCl}_3$

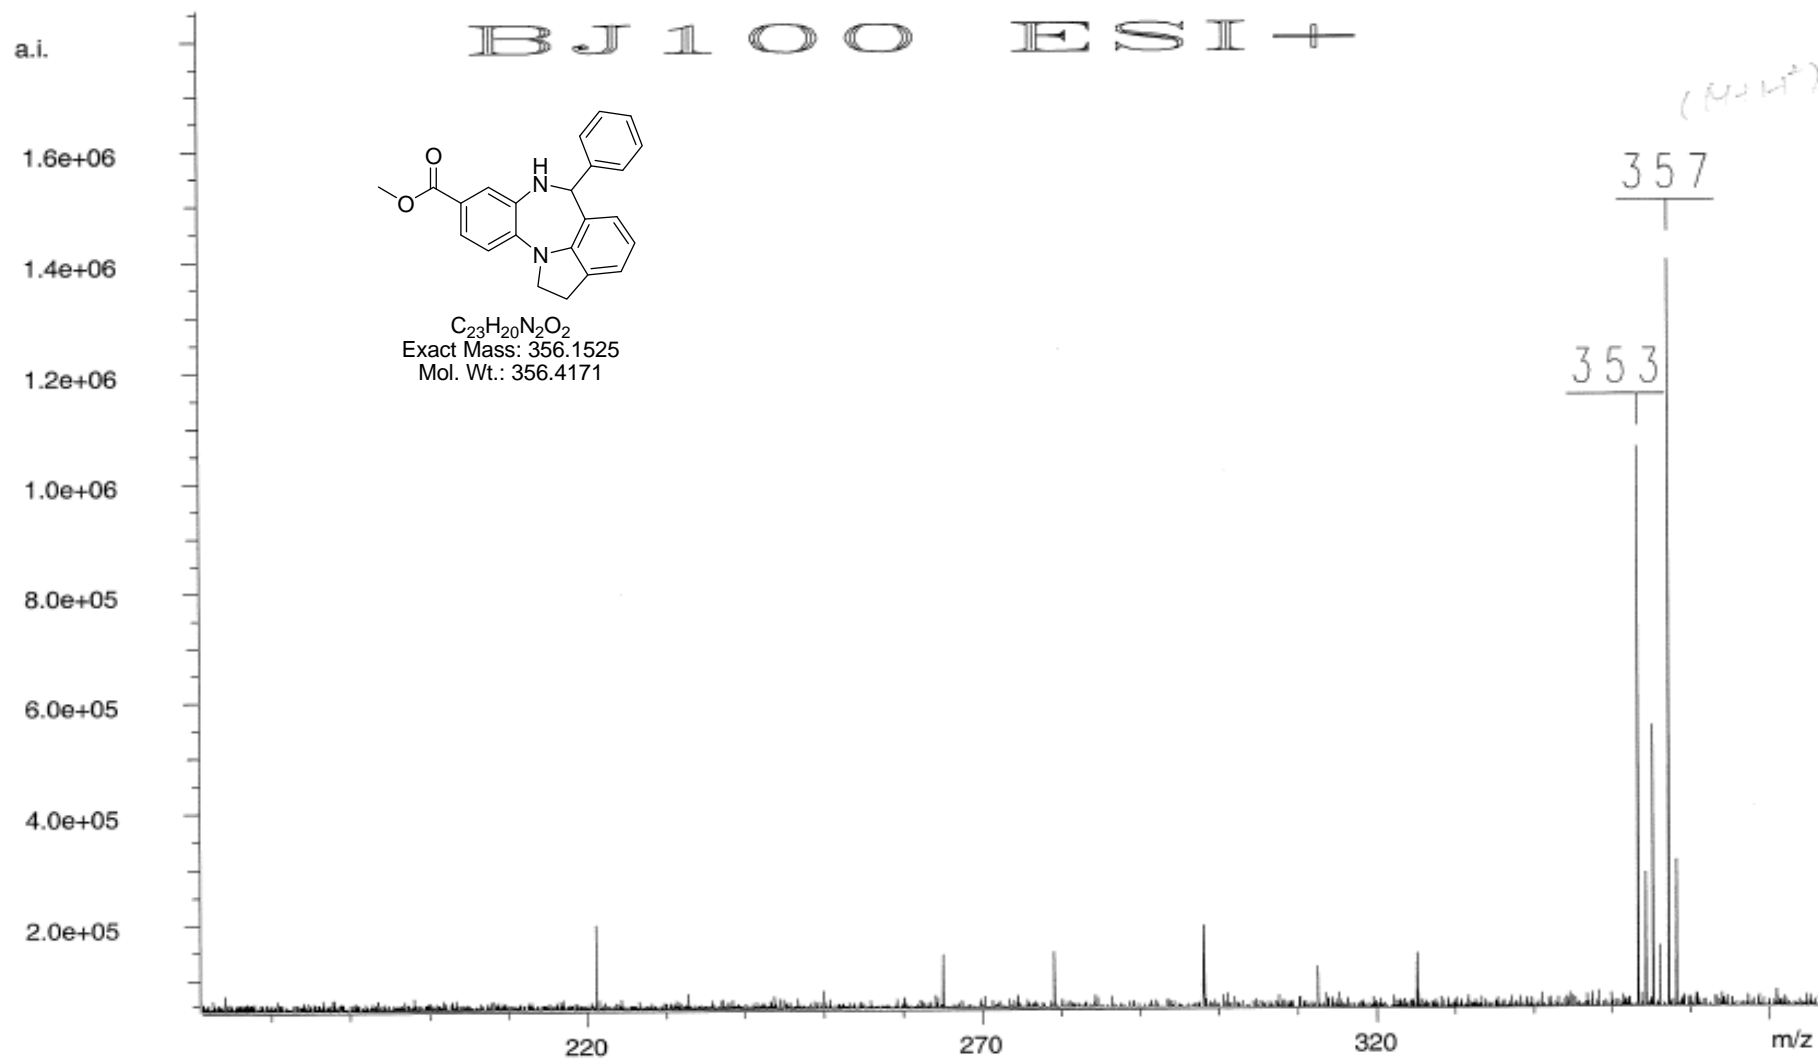

Low Resolution Mass Spectrum (LRMS) of compound 4f

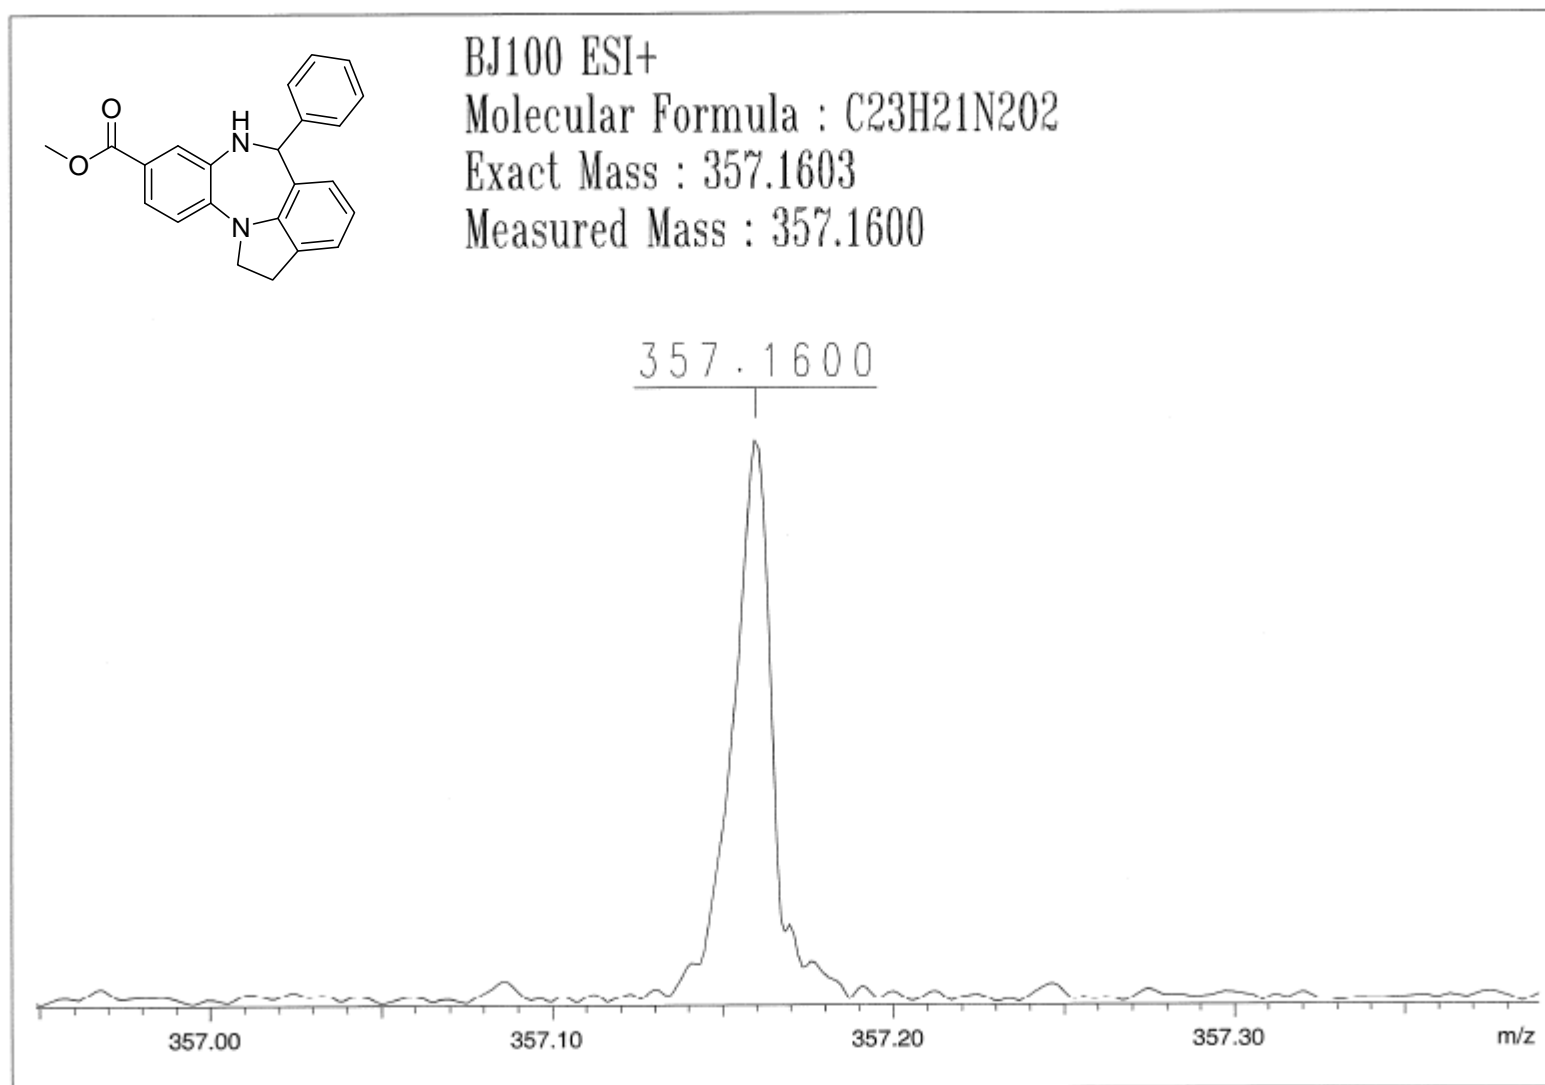

High Resolution Mass Spectrum (HRMS) of compound **4f**

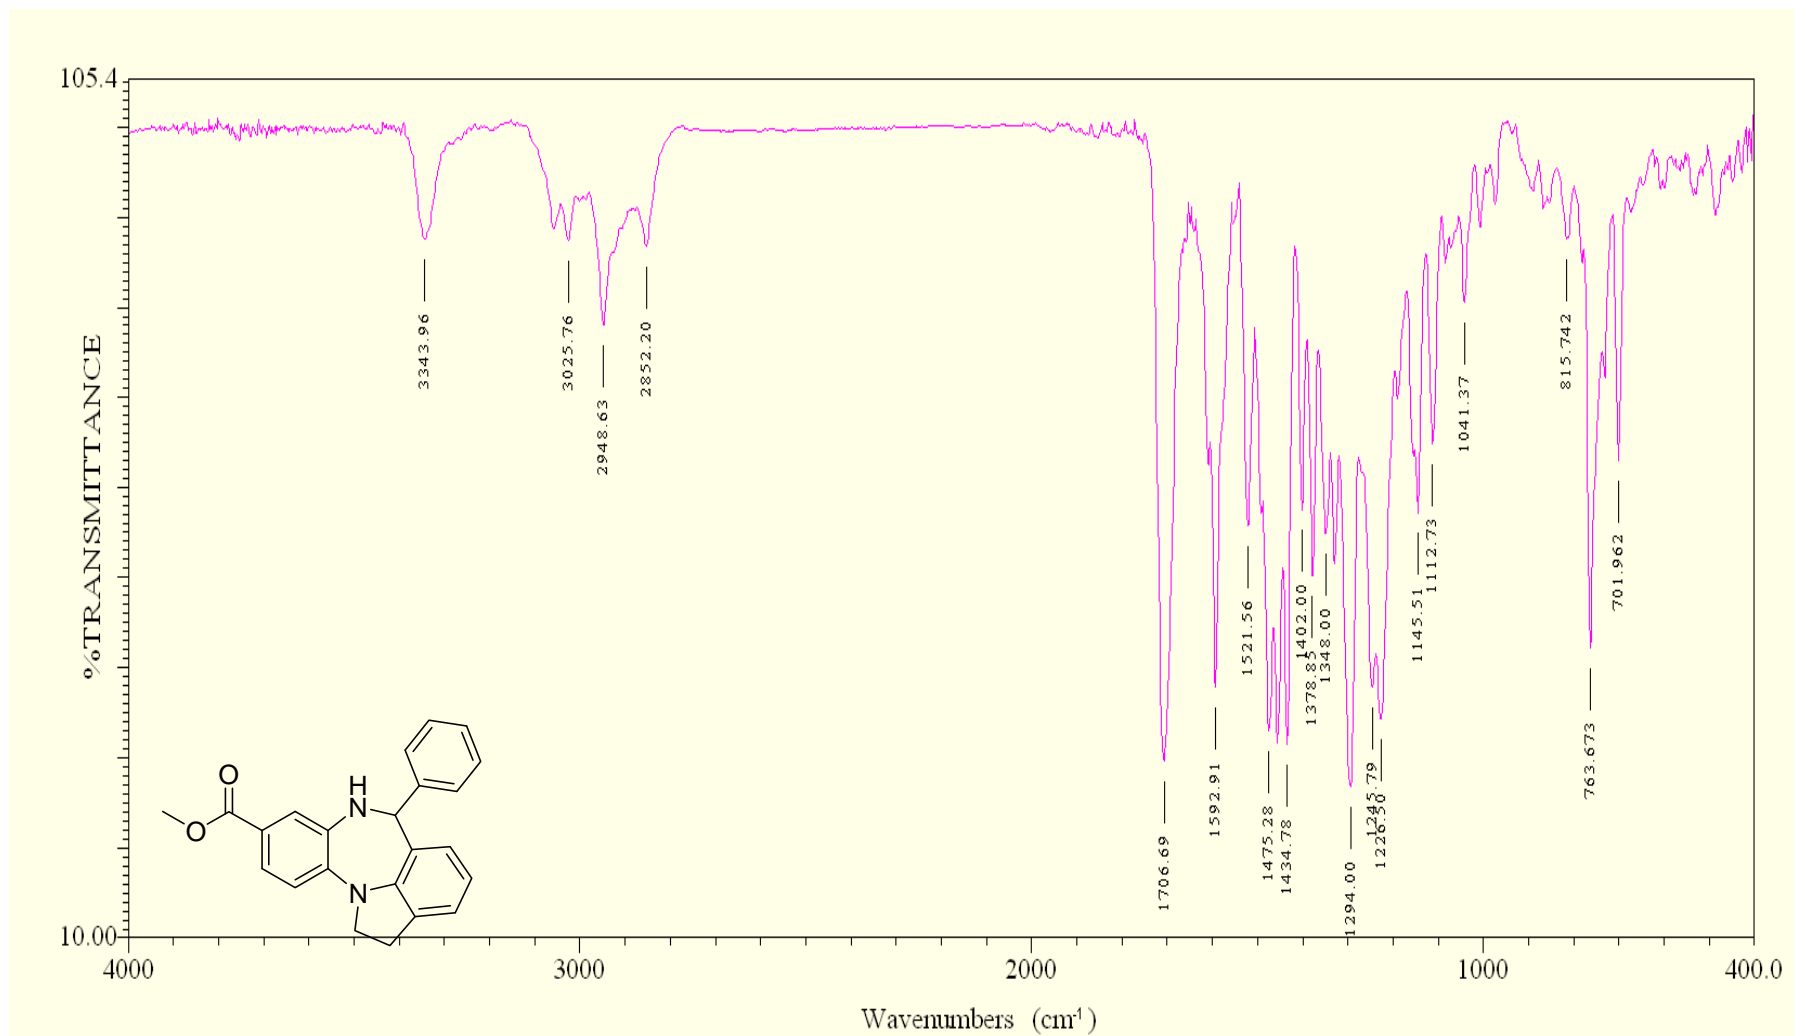

IR Spectrum of compound 4f (Neat)

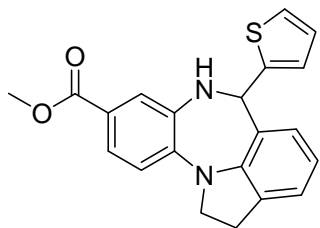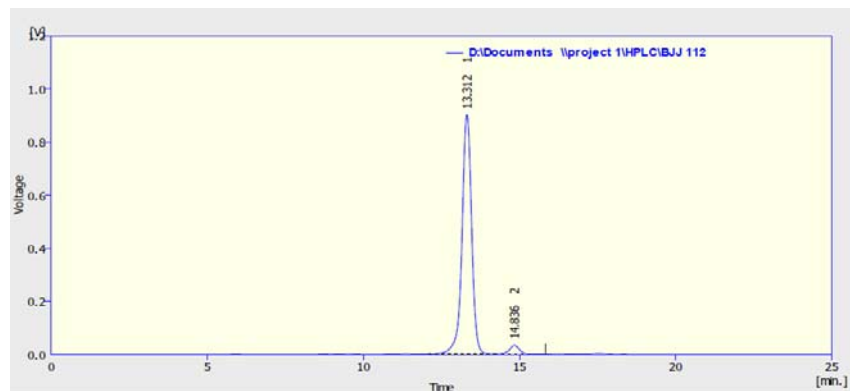

|   | Reten. Time [min] | Area [mV.s] | Height [mV] | Area [%] | Height [%] | W05 [min] |
|---|-------------------|-------------|-------------|----------|------------|-----------|
| 1 | 13.312            | 19425.827   | 901.979     | 96.3     | 96.5       | 0.32      |
| 2 | 14.836            | 755.886     | 32.924      | 3.7      | 3.5        | 0.34      |
|   | Total             | 20181.712   | 934.903     | 100.0    | 100.0      |           |

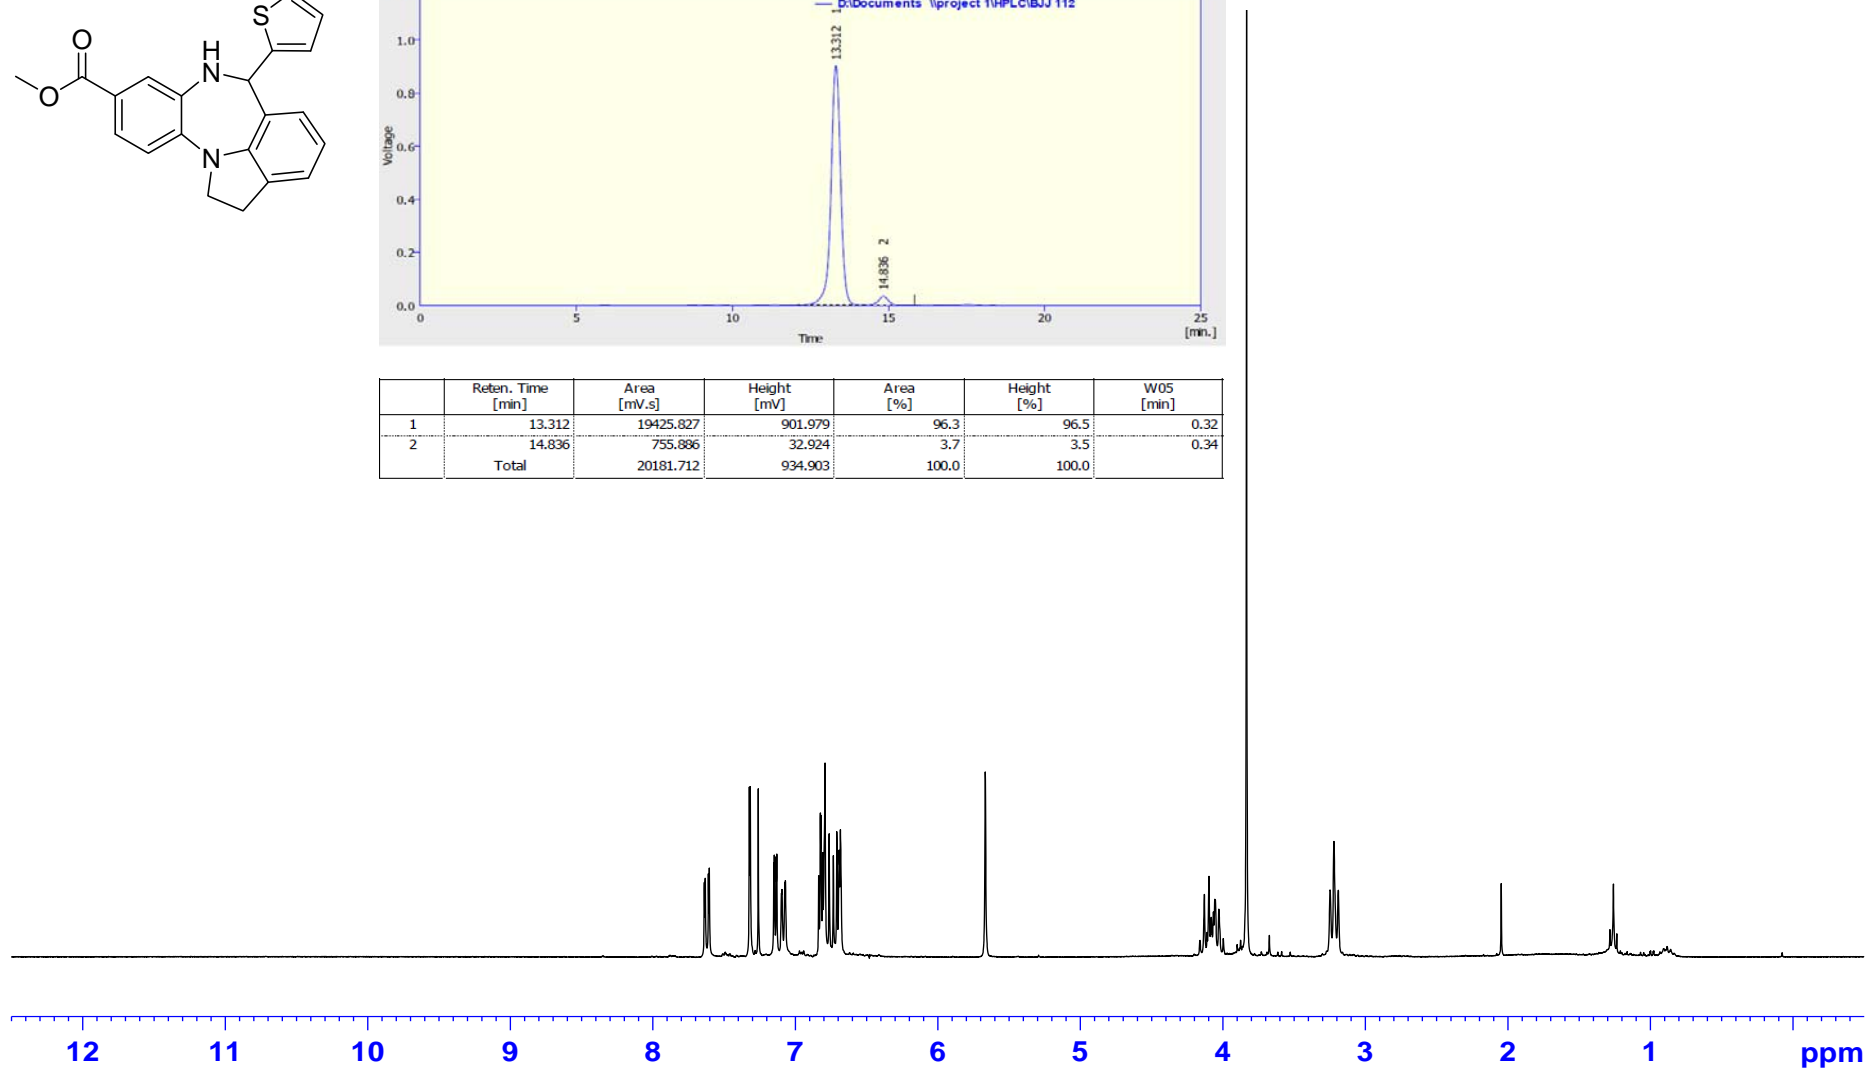

HPLC and <sup>1</sup>H NMR Spectrum (300 MHz) of compound **4g** in CDCl<sub>3</sub>

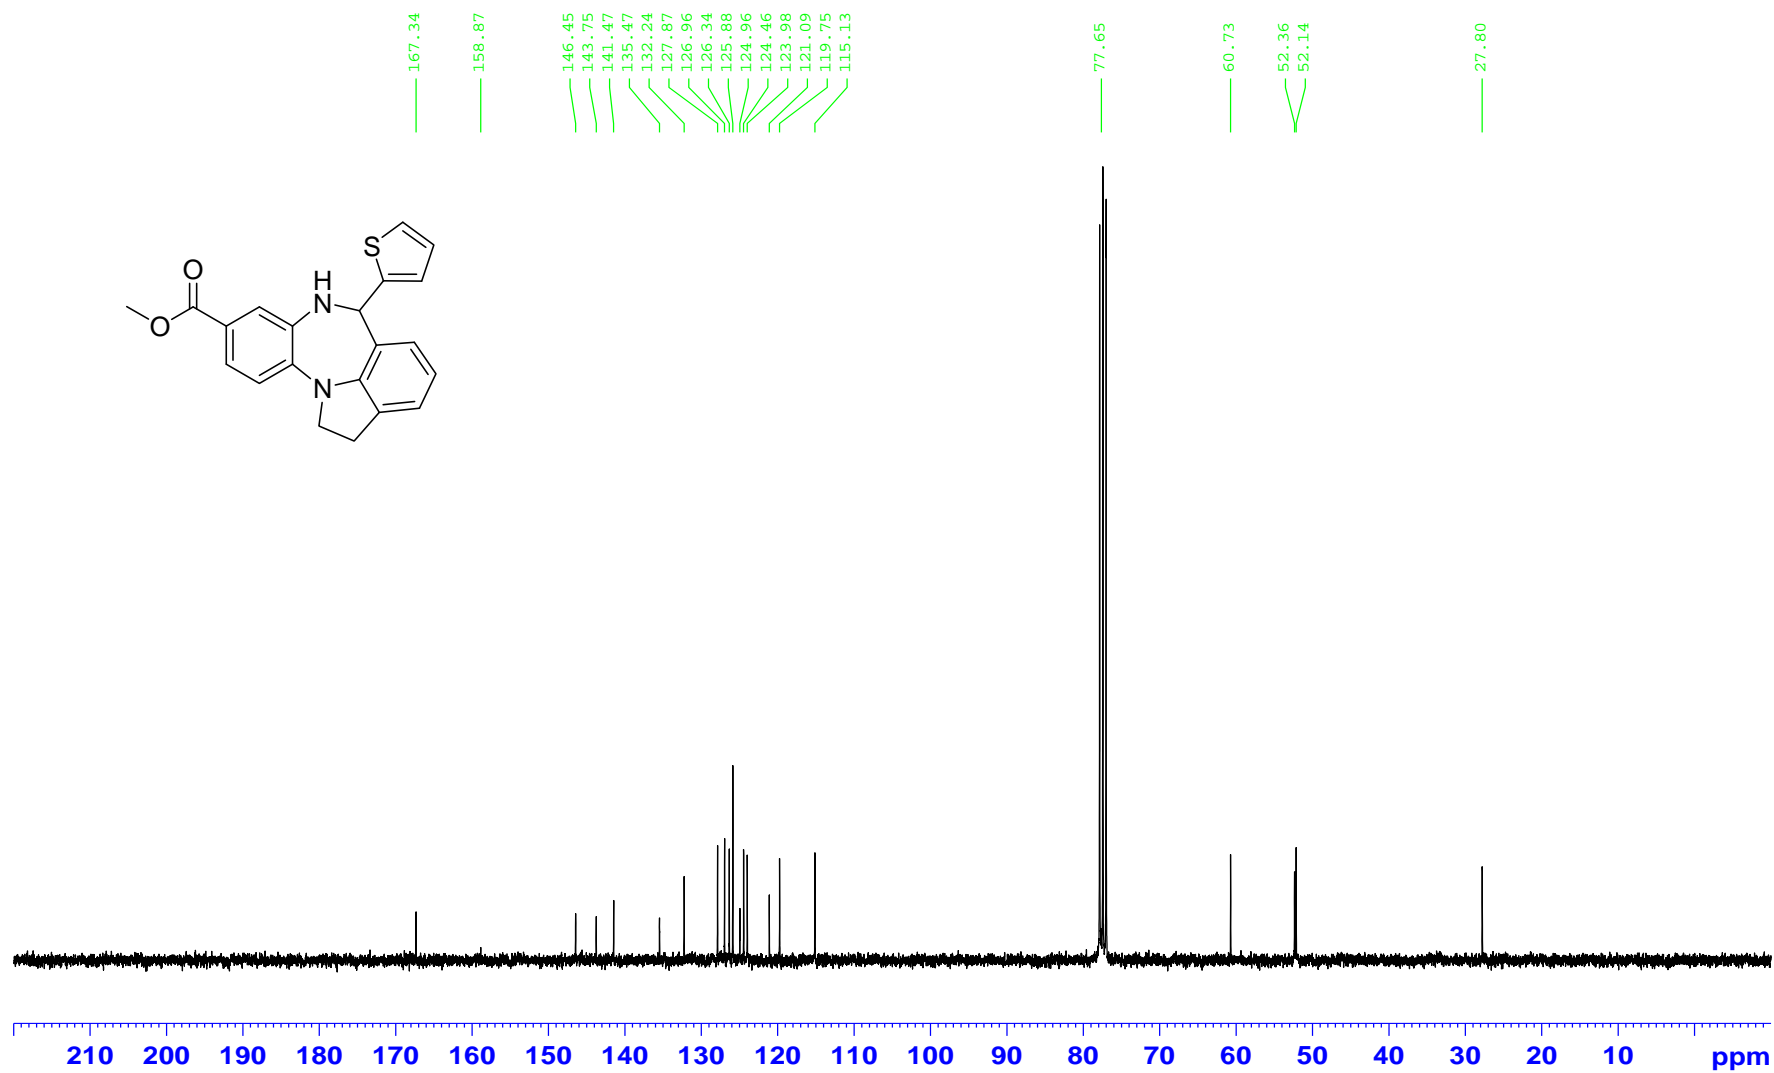

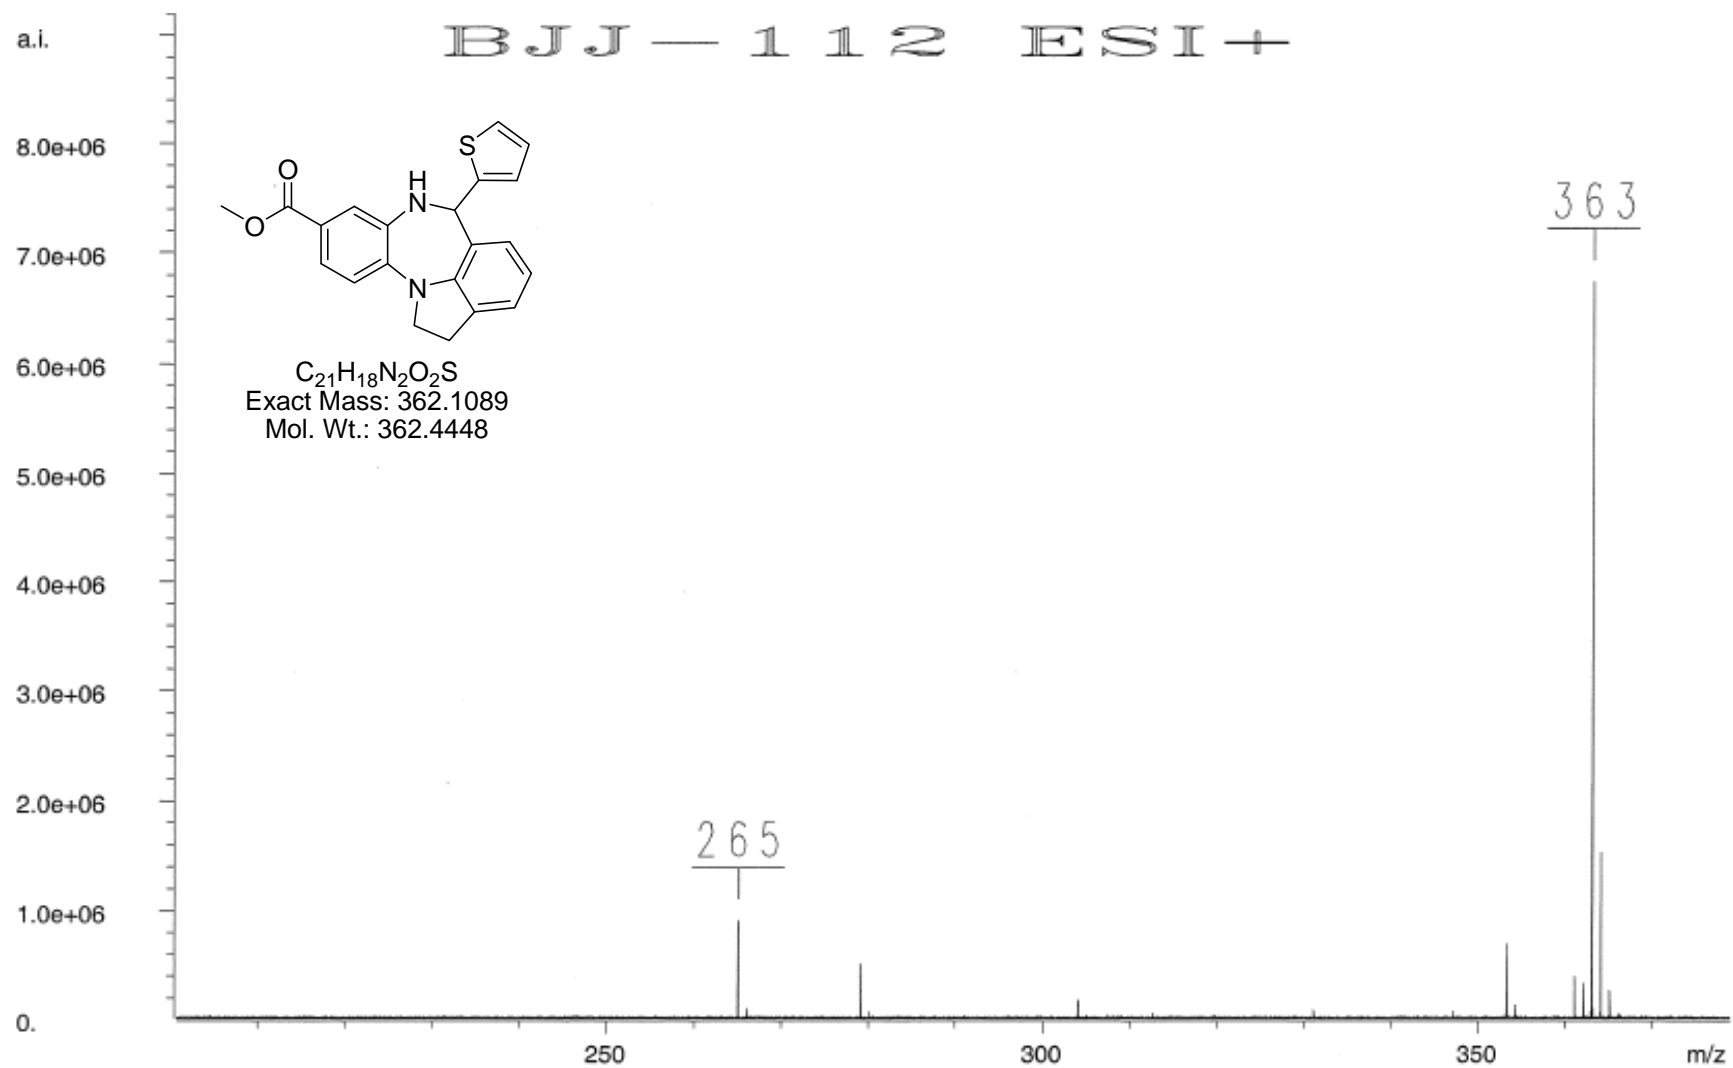

Low Resolution Mass Spectrum (LRMS) of compound **4g**



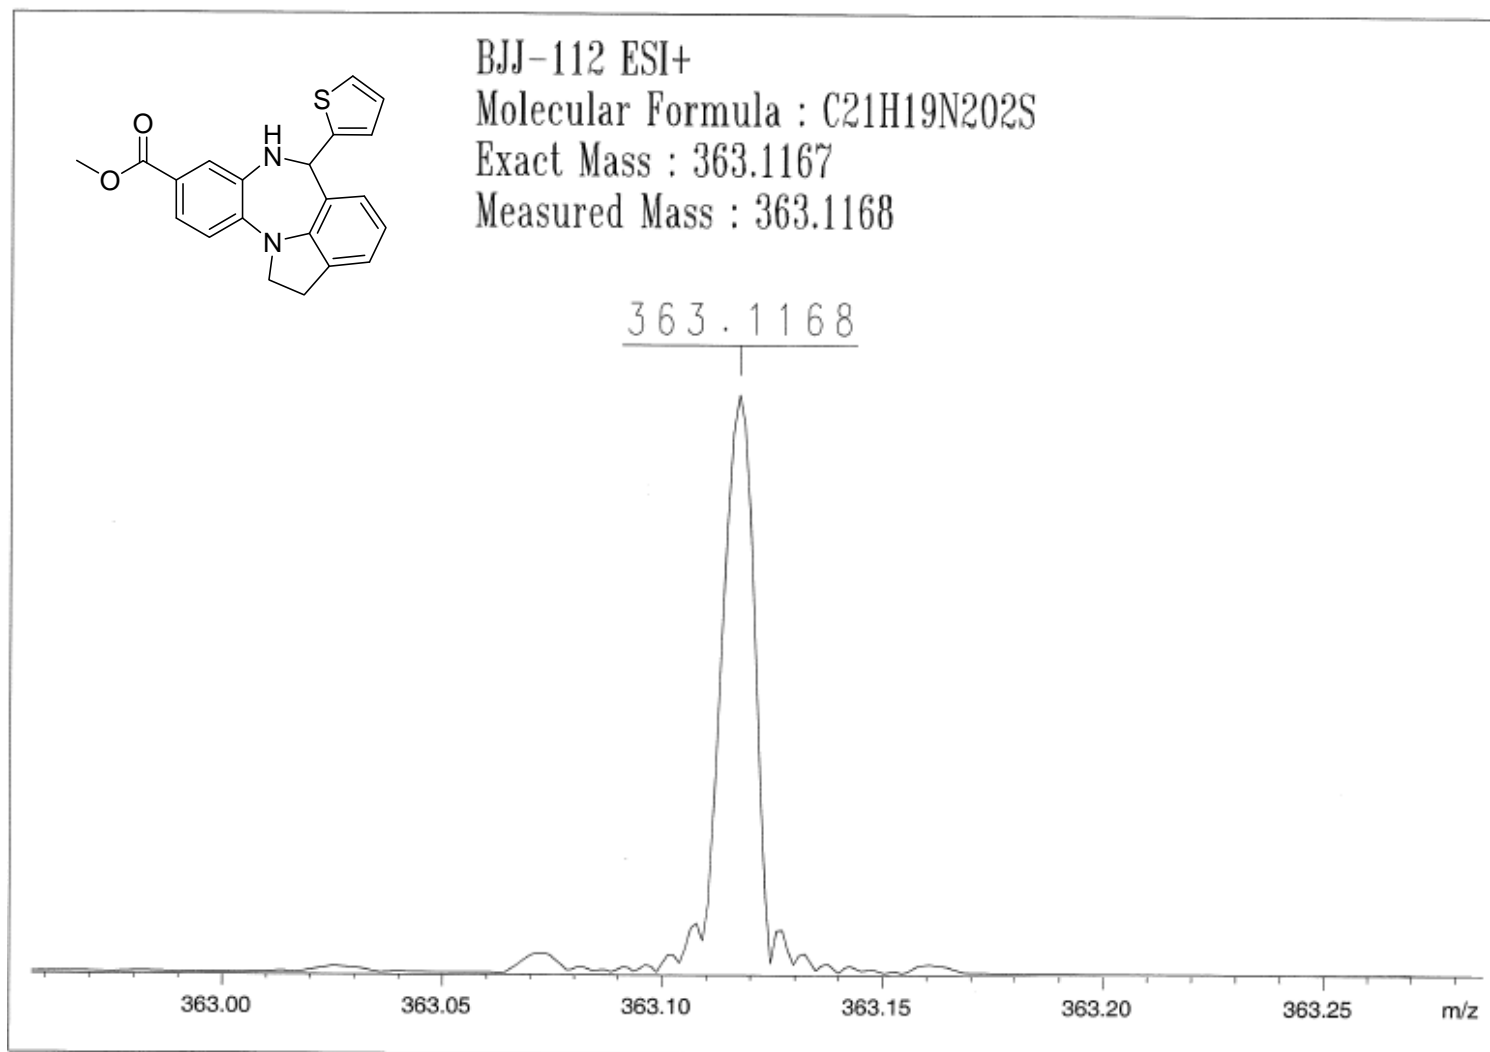

High Resolution Mass Spectrum (HRMS) of compound **4g**

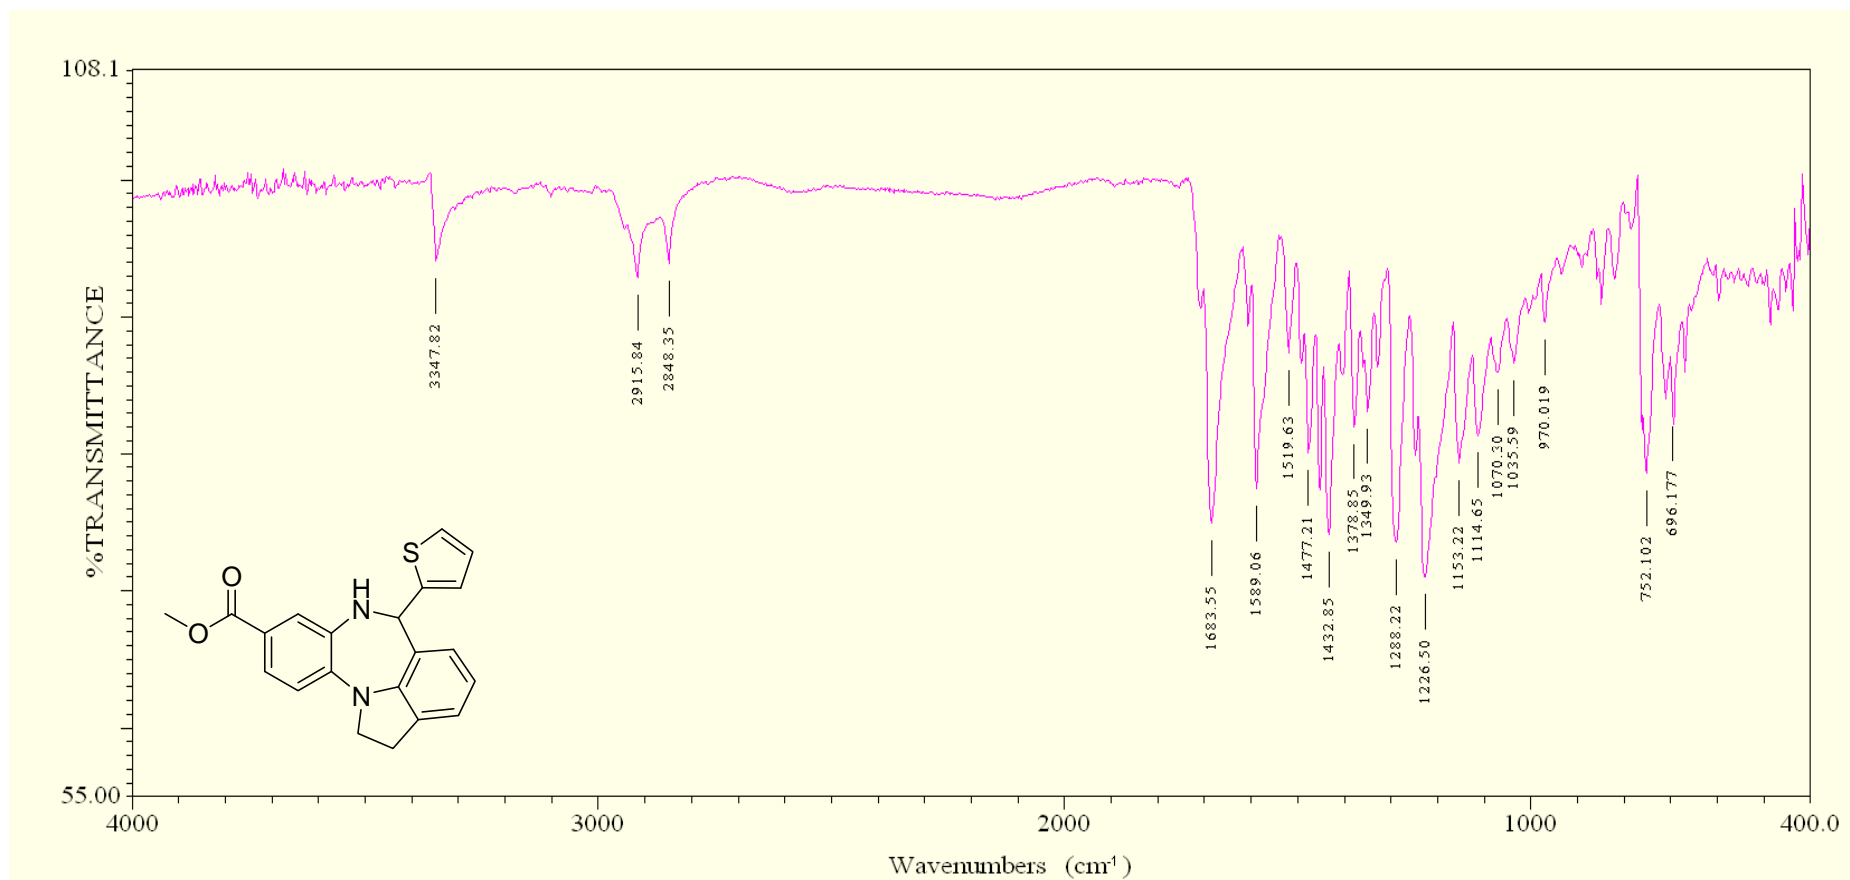

IR Spectrum of compound **4g** (Neat)

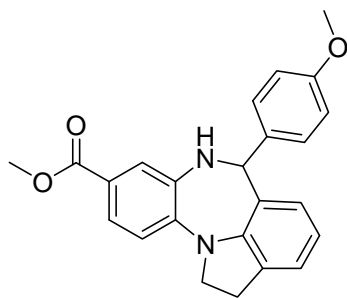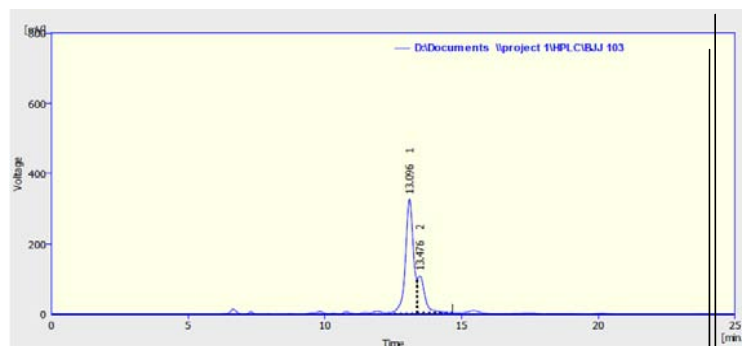

|       | Reten. Time [min] | Area [mV.s] | Height [mV] | Area [%] | Height [%] | W05 [min] |
|-------|-------------------|-------------|-------------|----------|------------|-----------|
| 1     | 13.096            | 6500.595    | 322.711     | 76.7     | 75.4       | 0.30      |
| 2     | 13.476            | 1979.173    | 105.133     | 23.3     | 24.6       | 0.28      |
| Total |                   | 8479.768    | 427.844     | 100.0    | 100.0      |           |

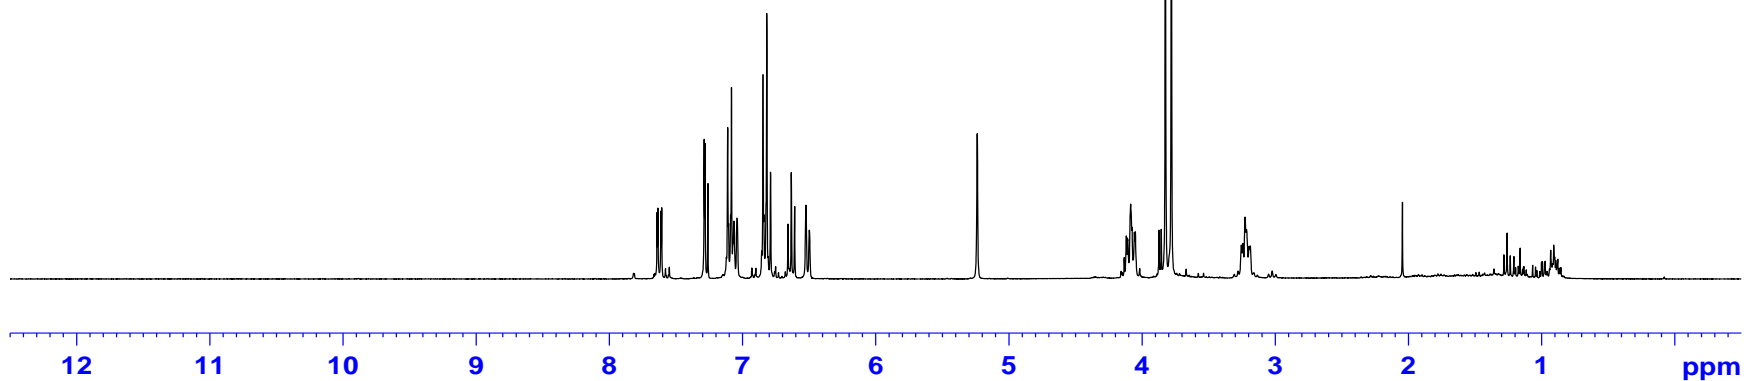

HPLC and <sup>1</sup>H NMR Spectrum (300 MHz) of compound **4h** in CDCl<sub>3</sub>

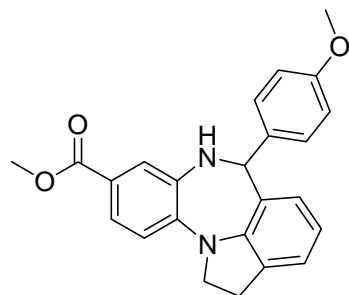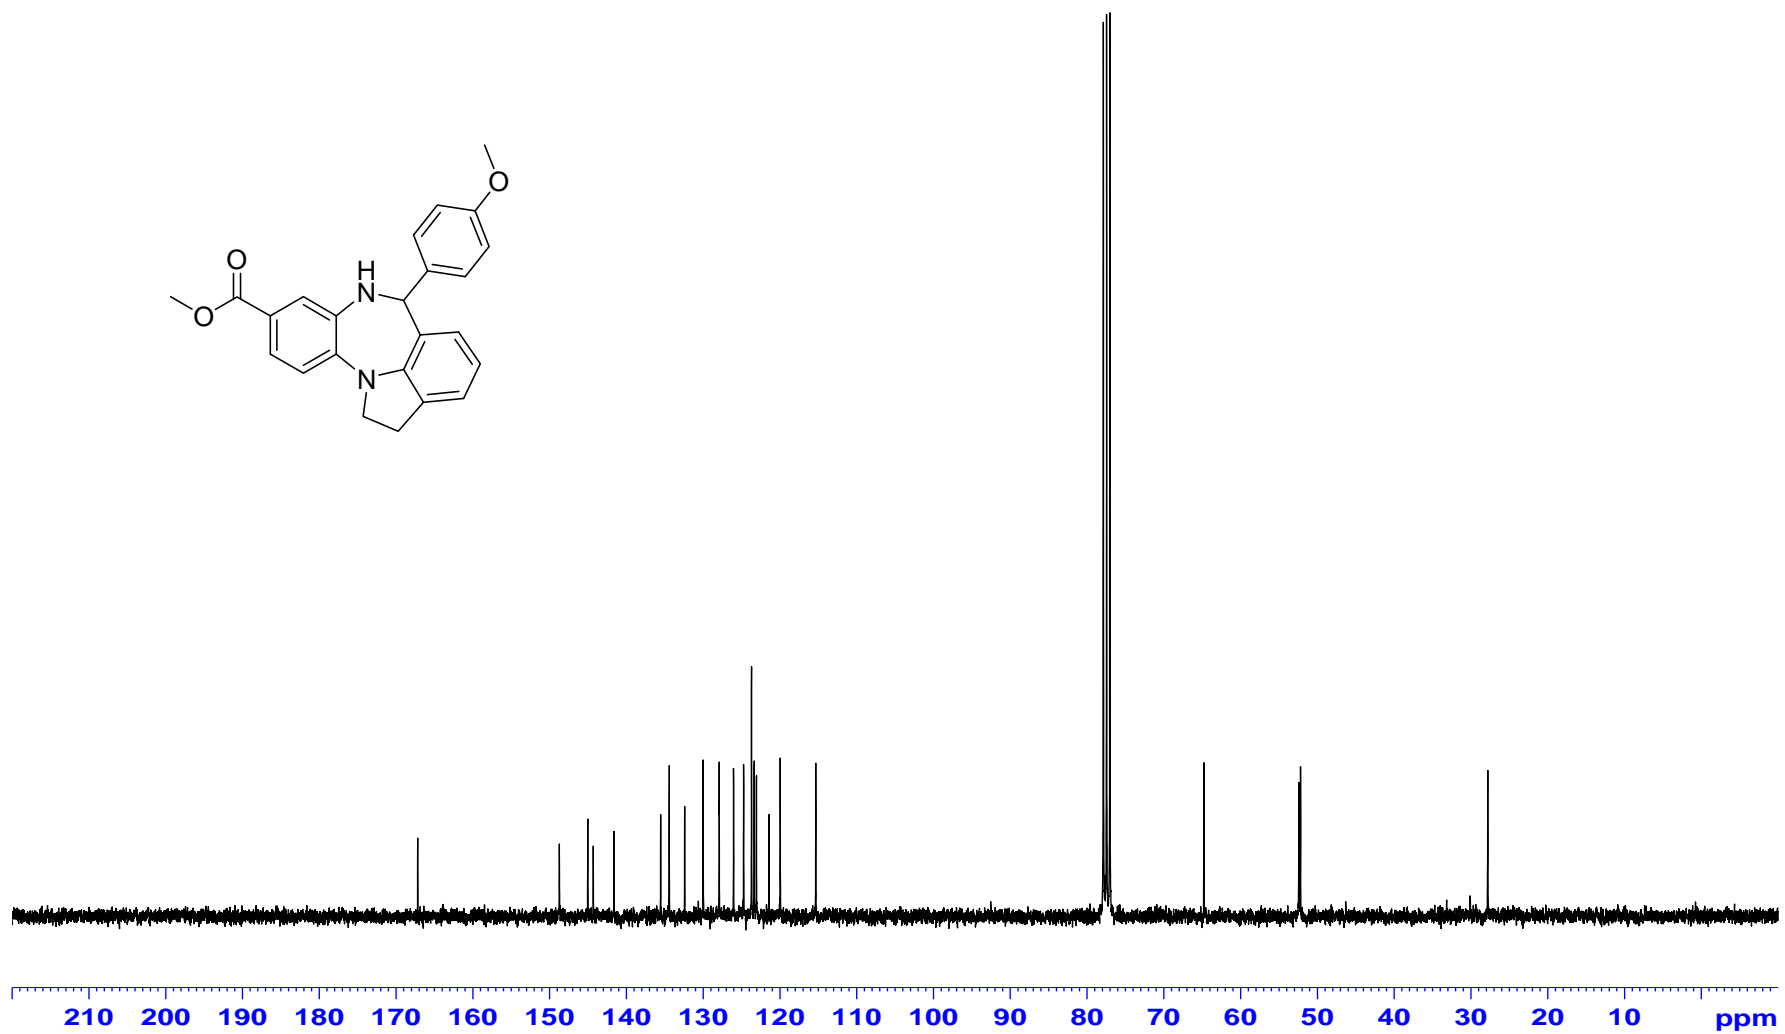

<sup>13</sup>C, DEPT NMR Spectrum (75 MHz) of compound **4h** in CDCl<sub>3</sub>

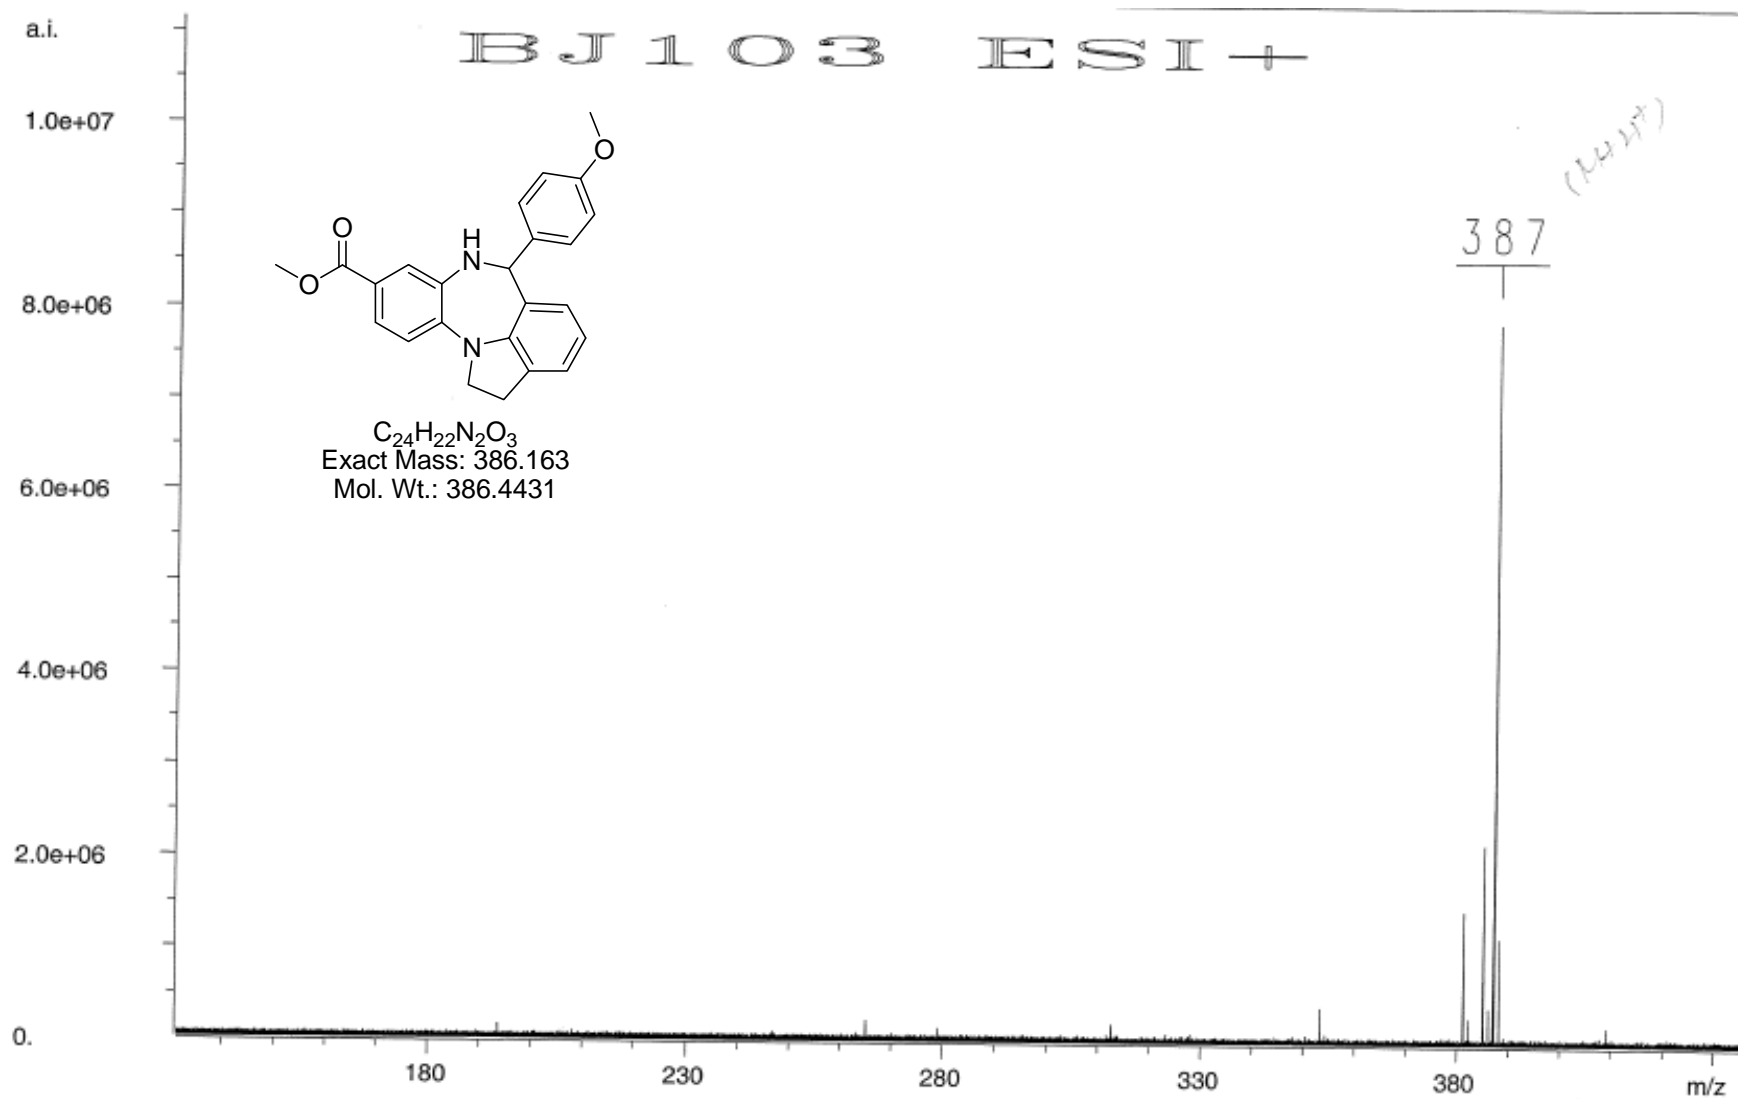

Low Resolution Mass Spectrum (LRMS) of compound **4h**

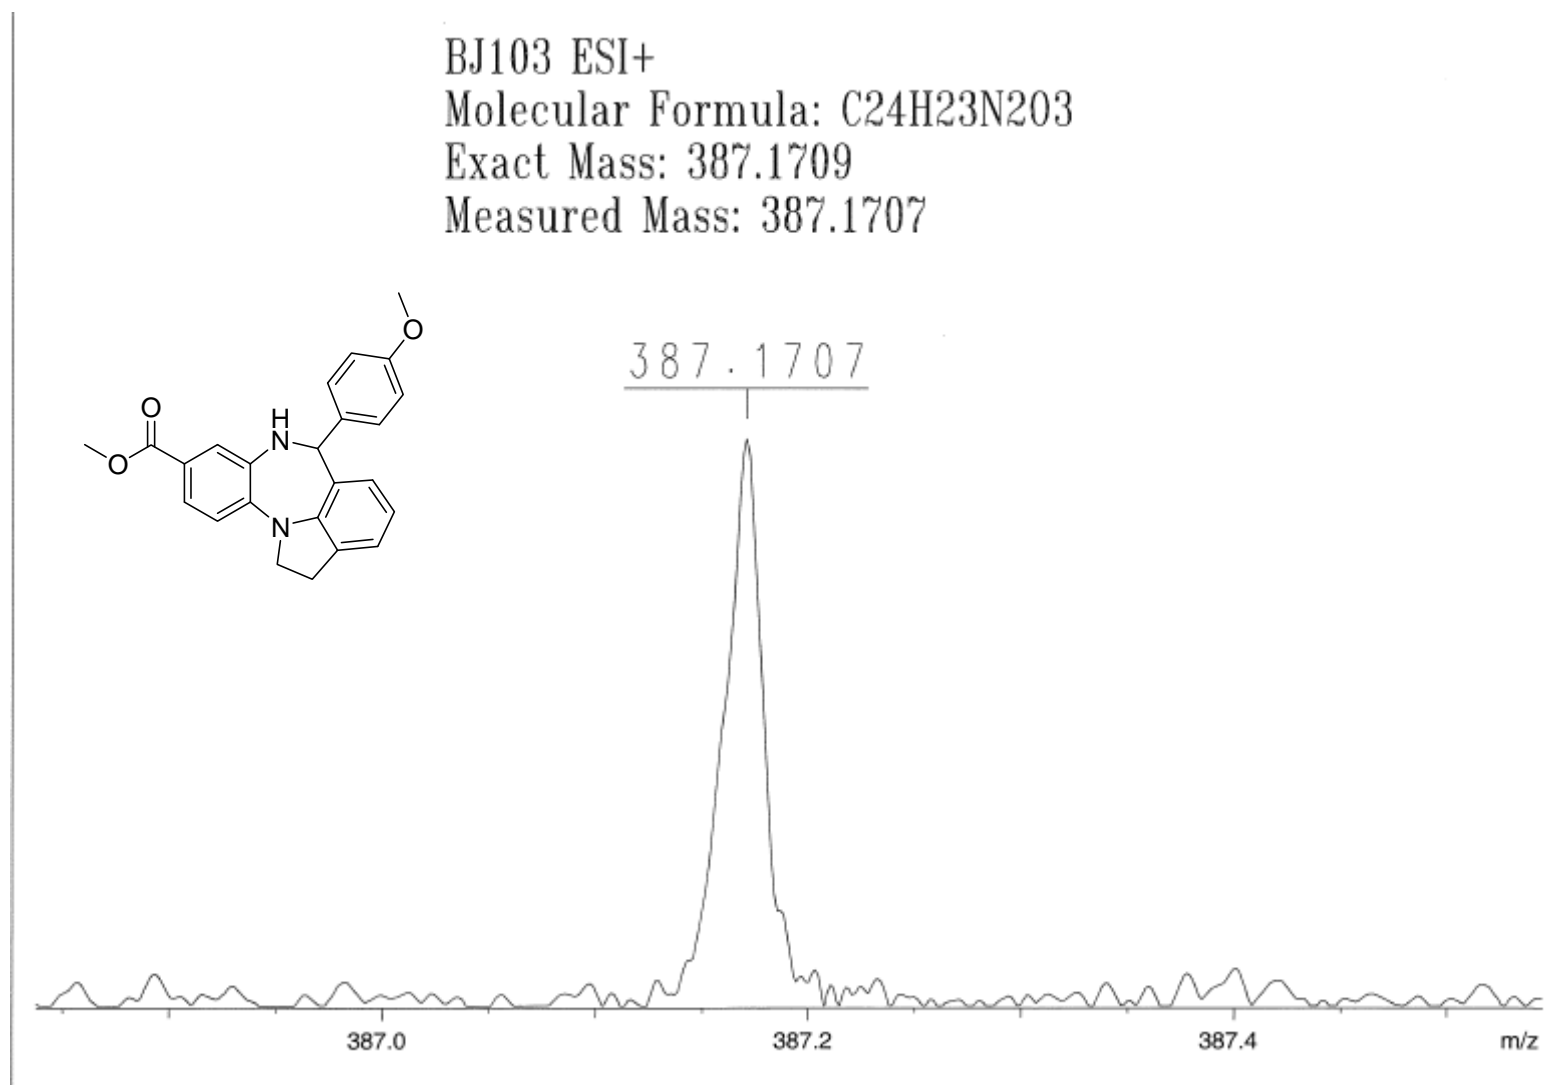

High Resolution Mass Spectrum (HRMS) of compound **4h**

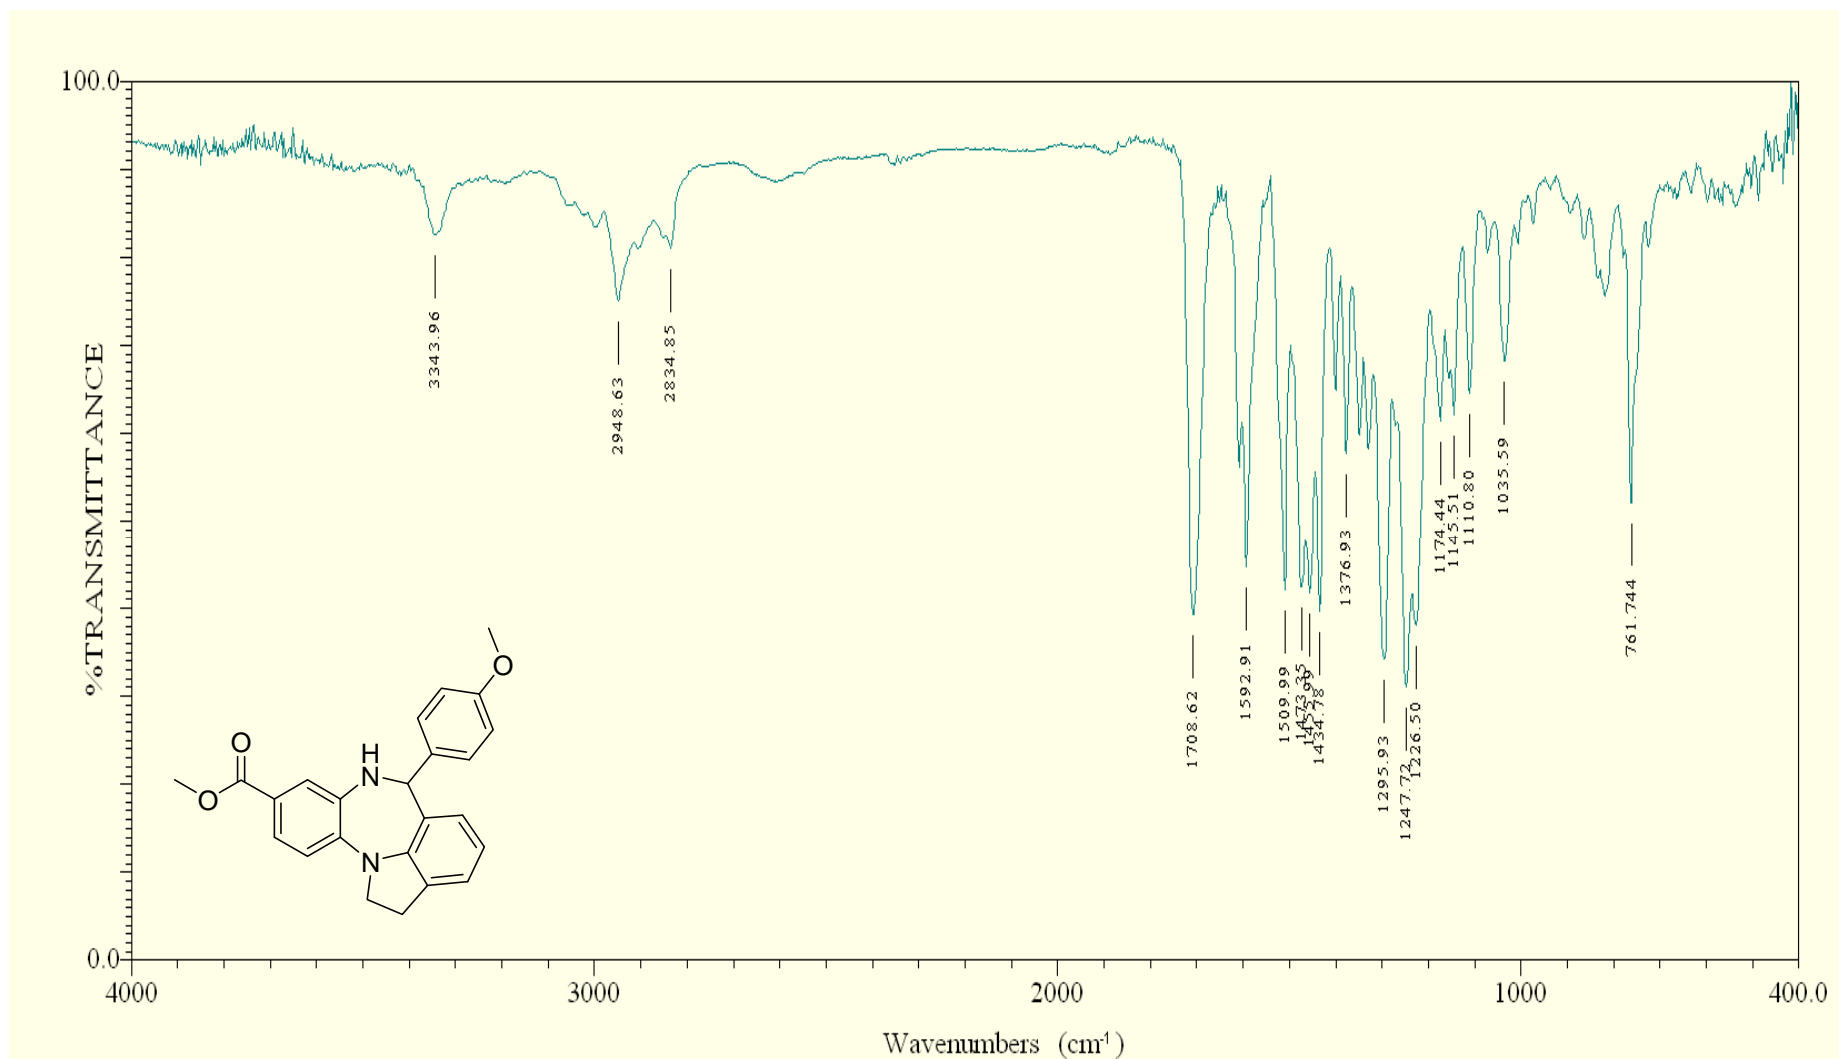

IR Spectrum of compound 4h (Neat)

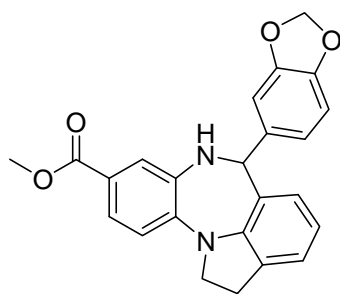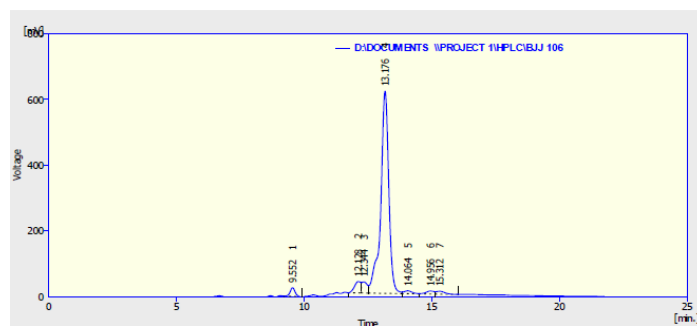

|   | Reten. Time [min.] | Area [mV·s] | Height [mV] | Area [%] | Height [%] | W05 [min.] |
|---|--------------------|-------------|-------------|----------|------------|------------|
| 1 | 9.552              | 346.066     | 26.294      | 2.2      | 3.6        | 0.20       |
| 2 | 12.120             | 391.504     | 34.667      | 3.7      | 4.7        | 0.26       |
| 3 | 12.344             | 522.009     | 33.061      | 3.3      | 4.6        | 0.29       |
| 4 | 13.176             | 13702.260   | 615.702     | 86.8     | 83.5       | 0.30       |
| 5 | 14.064             | 202.764     | 8.921       | 1.3      | 1.2        | 0.40       |
| 6 | 14.956             | 208.533     | 9.262       | 1.3      | 1.3        | 0.36       |
| 7 | 15.312             | 210.332     | 8.899       | 1.3      | 1.2        | 0.36       |
|   | Total              | 15785.160   | 737.607     | 100.0    | 100.0      |            |

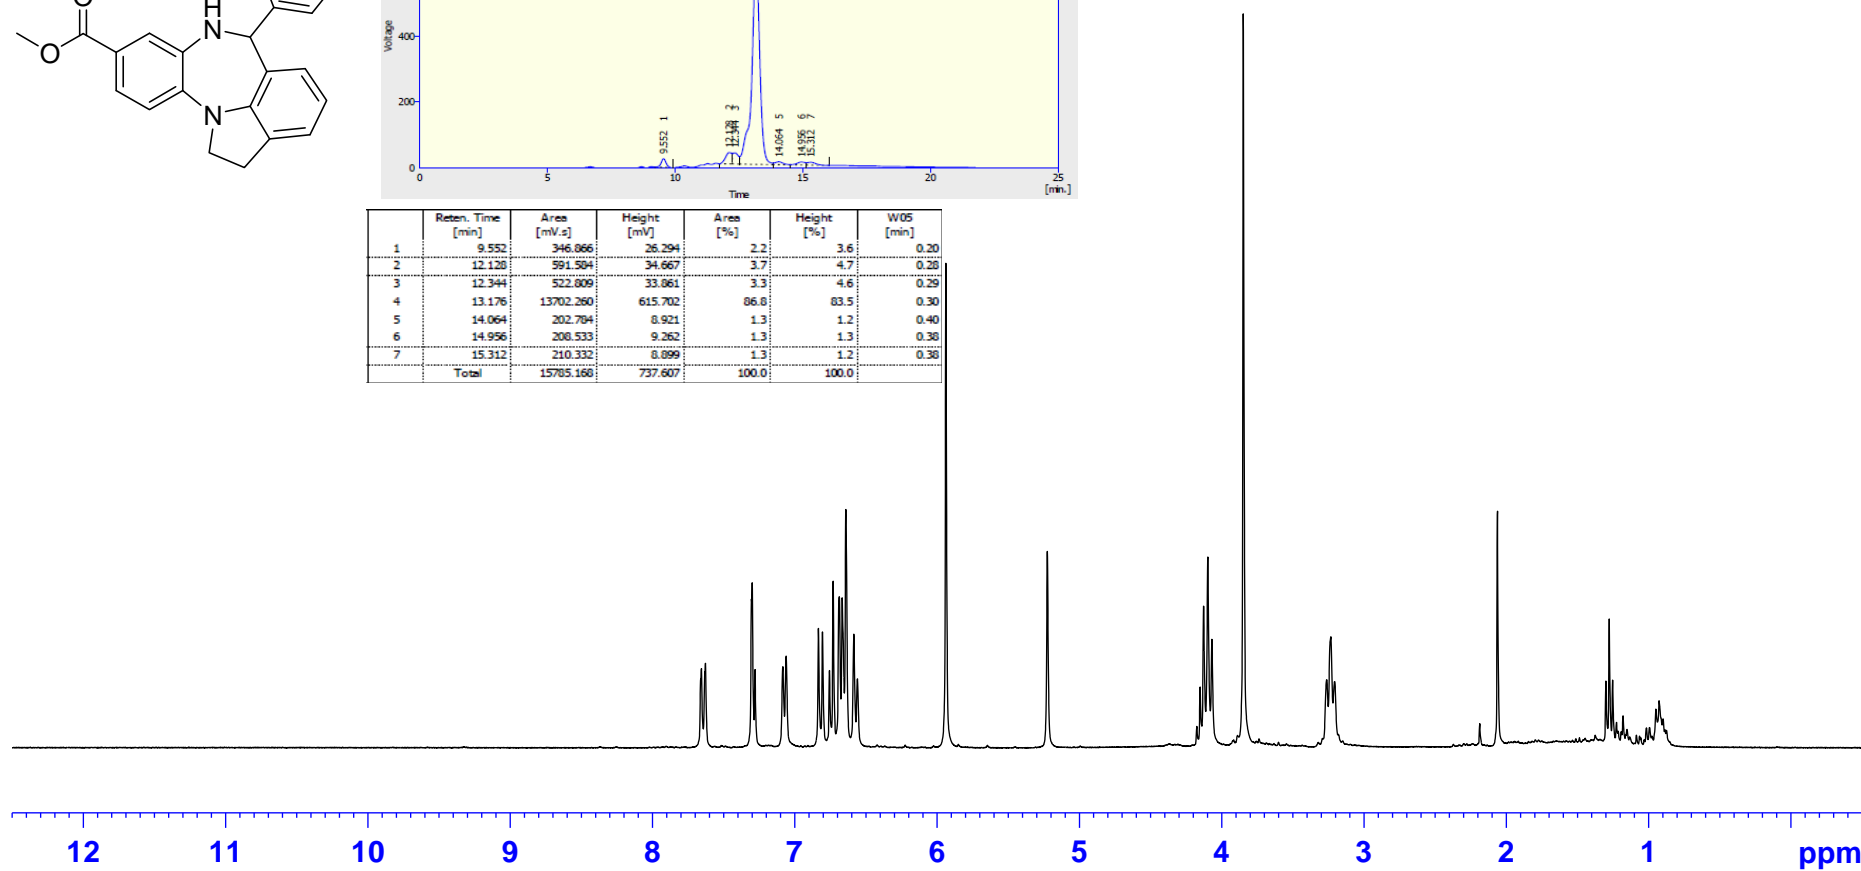

HPLC and  $^1\text{H}$  NMR Spectrum (300 MHz) of compound **4i** in  $\text{CDCl}_3$



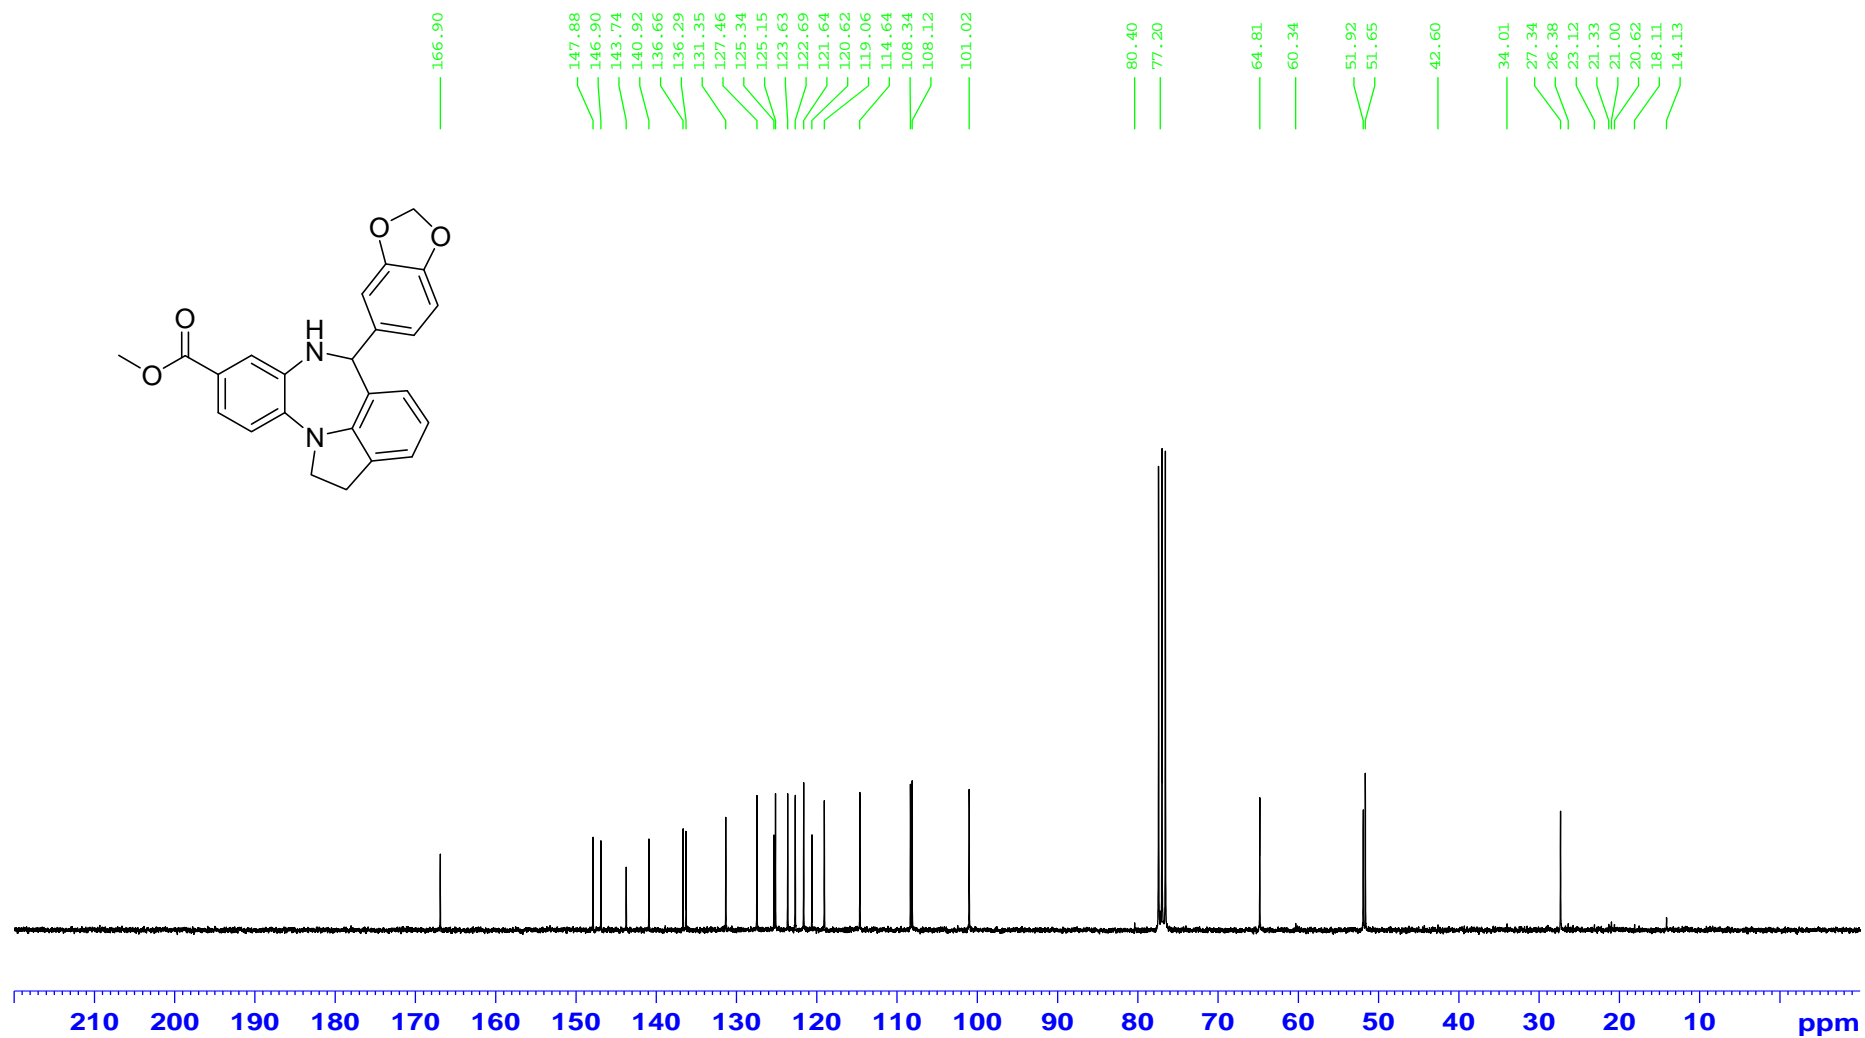

<sup>13</sup>C NMR Spectrum (75 MHz) of compound **4i** in CDCl<sub>3</sub>

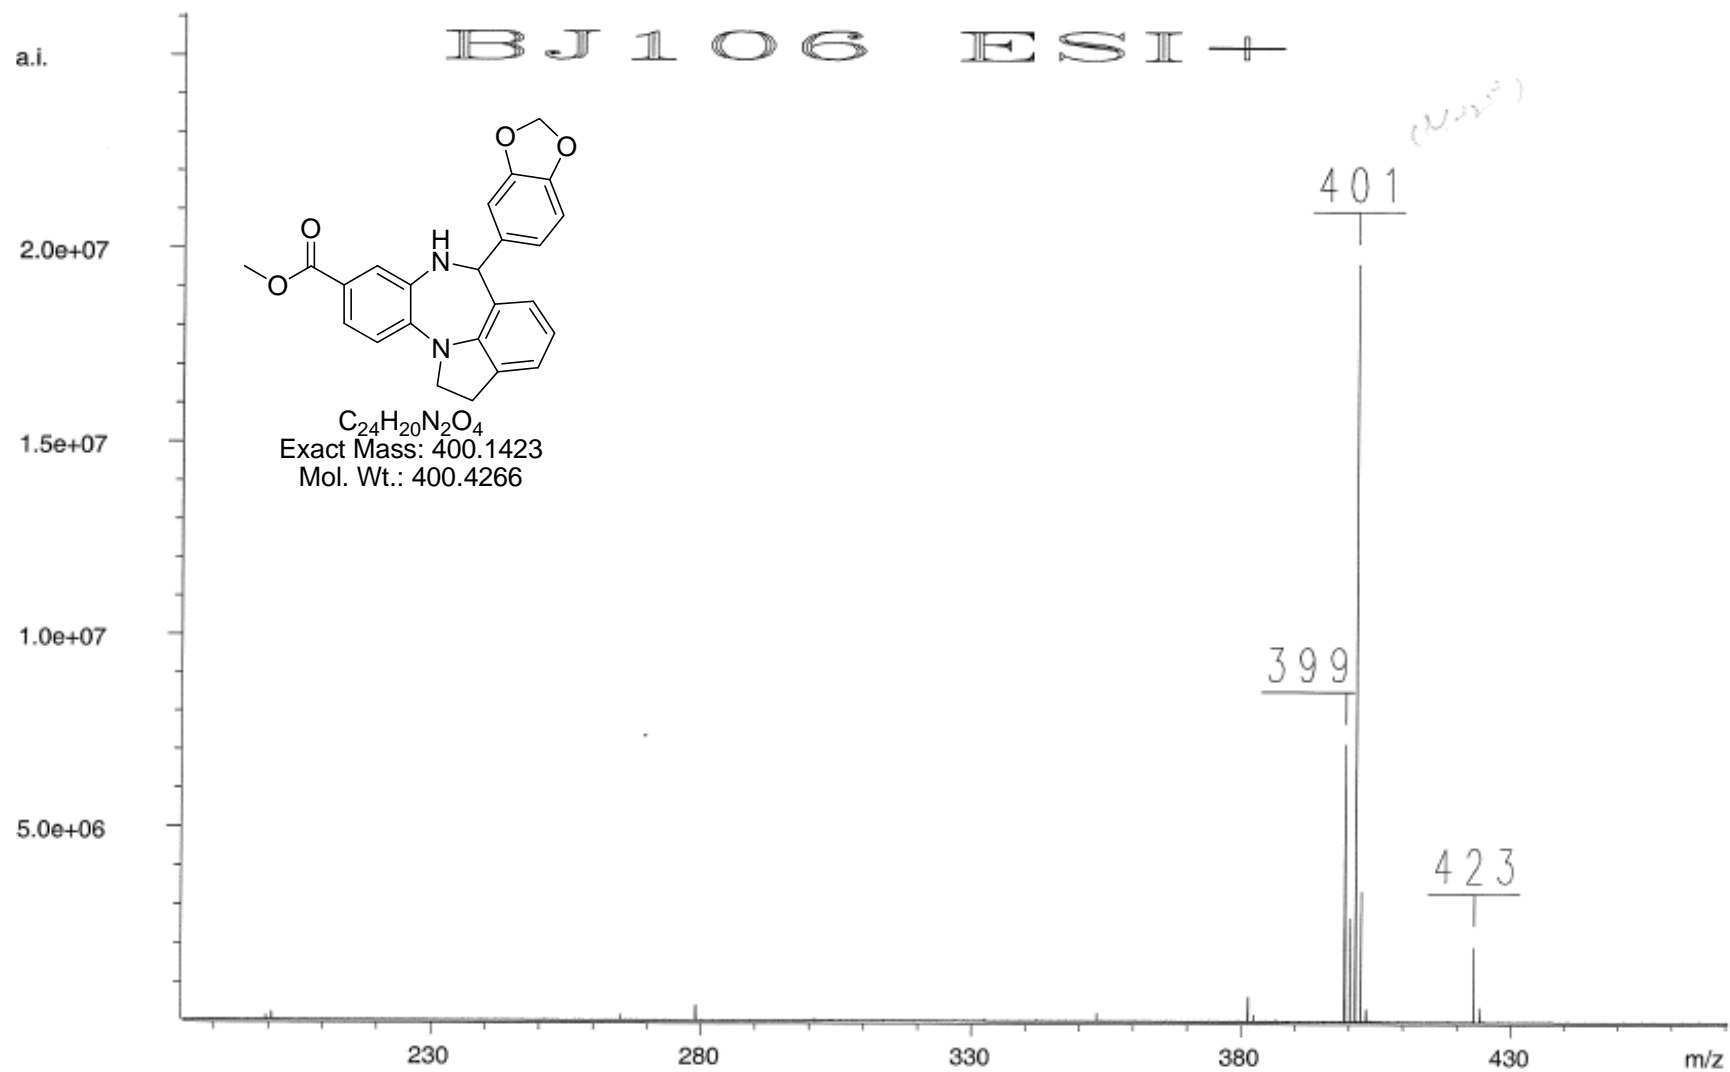

Low Resolution Mass Spectrum (LRMS) of compound **4i**

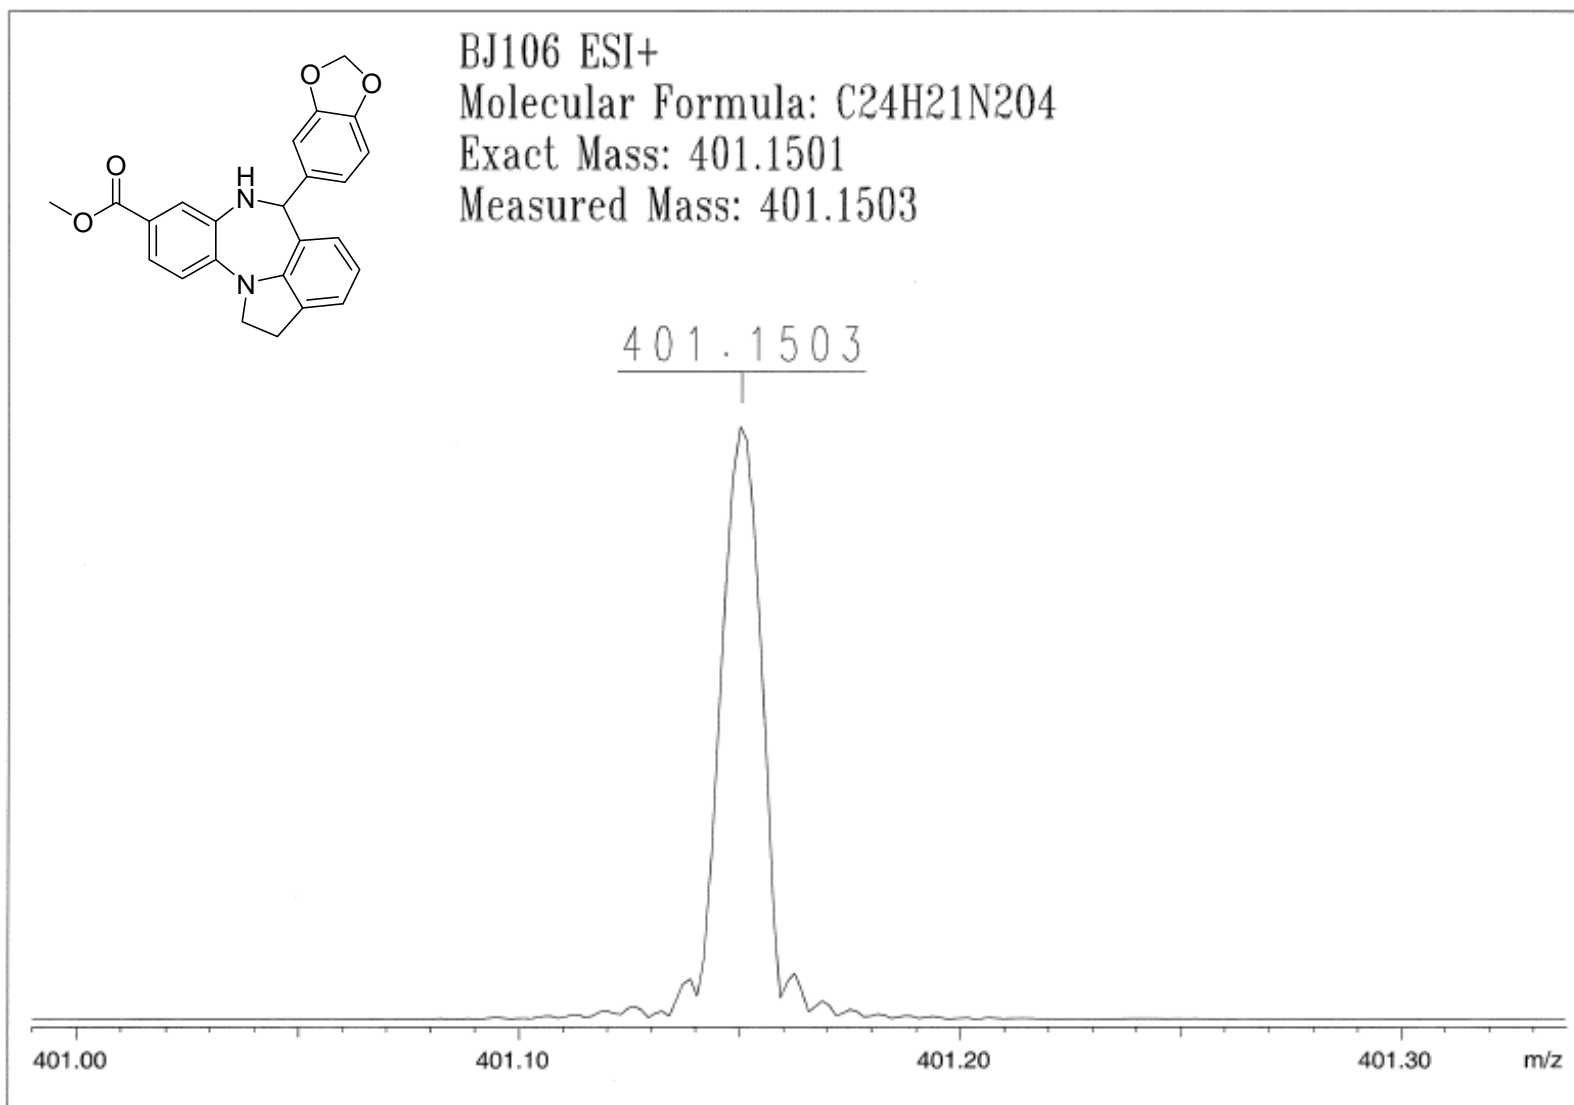

High Resolution Mass Spectrum (HRMS) of compound **4i**

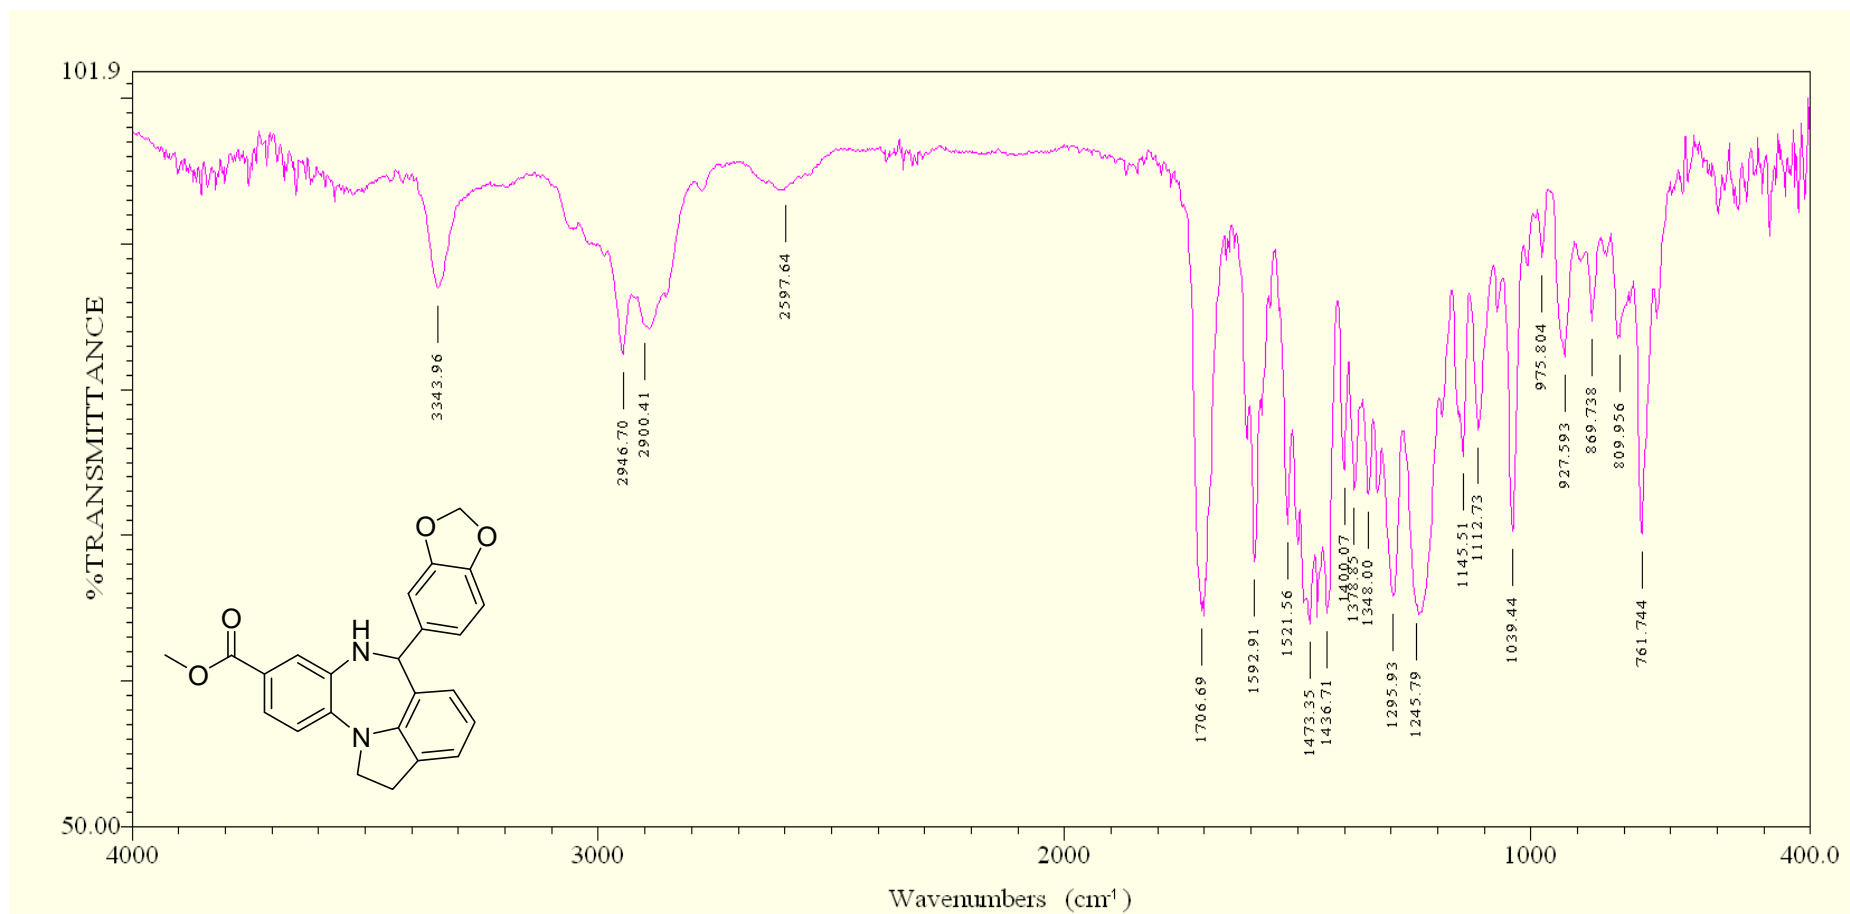

IR Spectrum of compound **4i** (Neat)

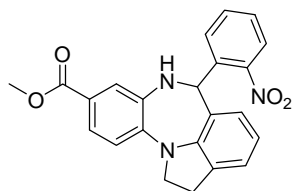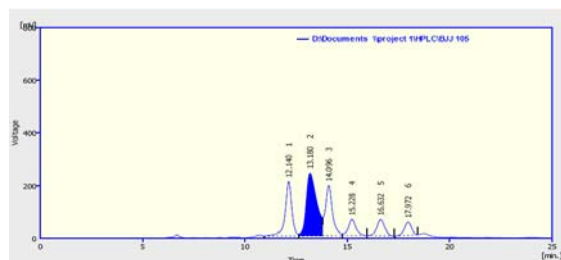

|       | Reten. Time [min] | Area [mV.s] | Height [mV] | Area [%] | Height [%] | W05 [min] |
|-------|-------------------|-------------|-------------|----------|------------|-----------|
| 1     | 12.140            | 4690.873    | 208.240     | 21.1     | 25.7       | 0.31      |
| 2     | 13.180            | 8449.461    | 239.028     | 38.1     | 29.5       | 0.56      |
| 3     | 14.096            | 4640.002    | 191.116     | 20.9     | 23.6       | 0.36      |
| 4     | 15.228            | 1566.813    | 61.040      | 7.1      | 7.5        | 0.37      |
| 5     | 16.632            | 1646.368    | 61.694      | 7.4      | 7.6        | 0.40      |
| 6     | 17.972            | 1196.461    | 49.188      | 5.4      | 6.1        | 0.38      |
| Total |                   | 22189.960   | 810.307     | 100.0    | 100.0      |           |

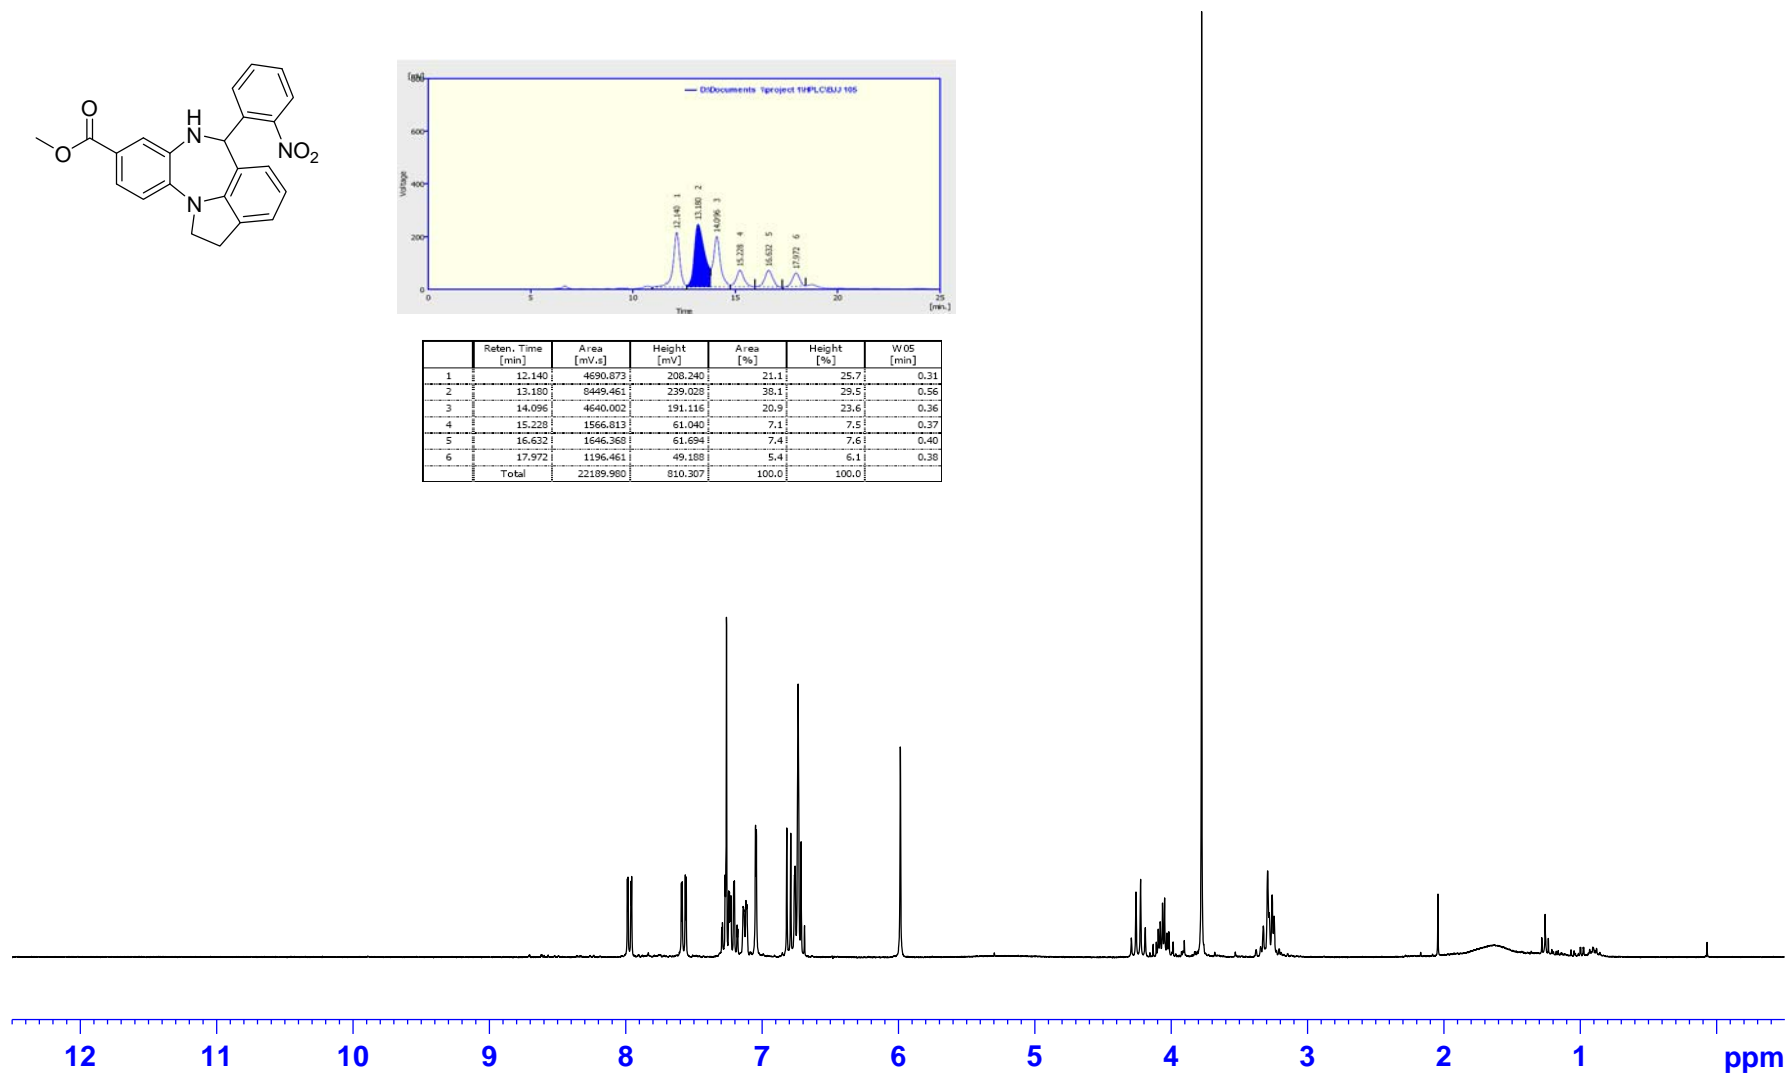

HPLC and  $^1\text{H}$  NMR Spectrum (300 MHz) of compound **4j** in  $\text{CDCl}_3$

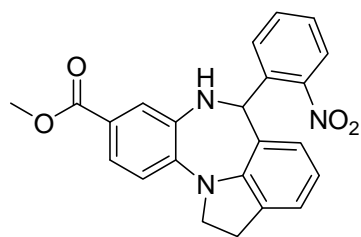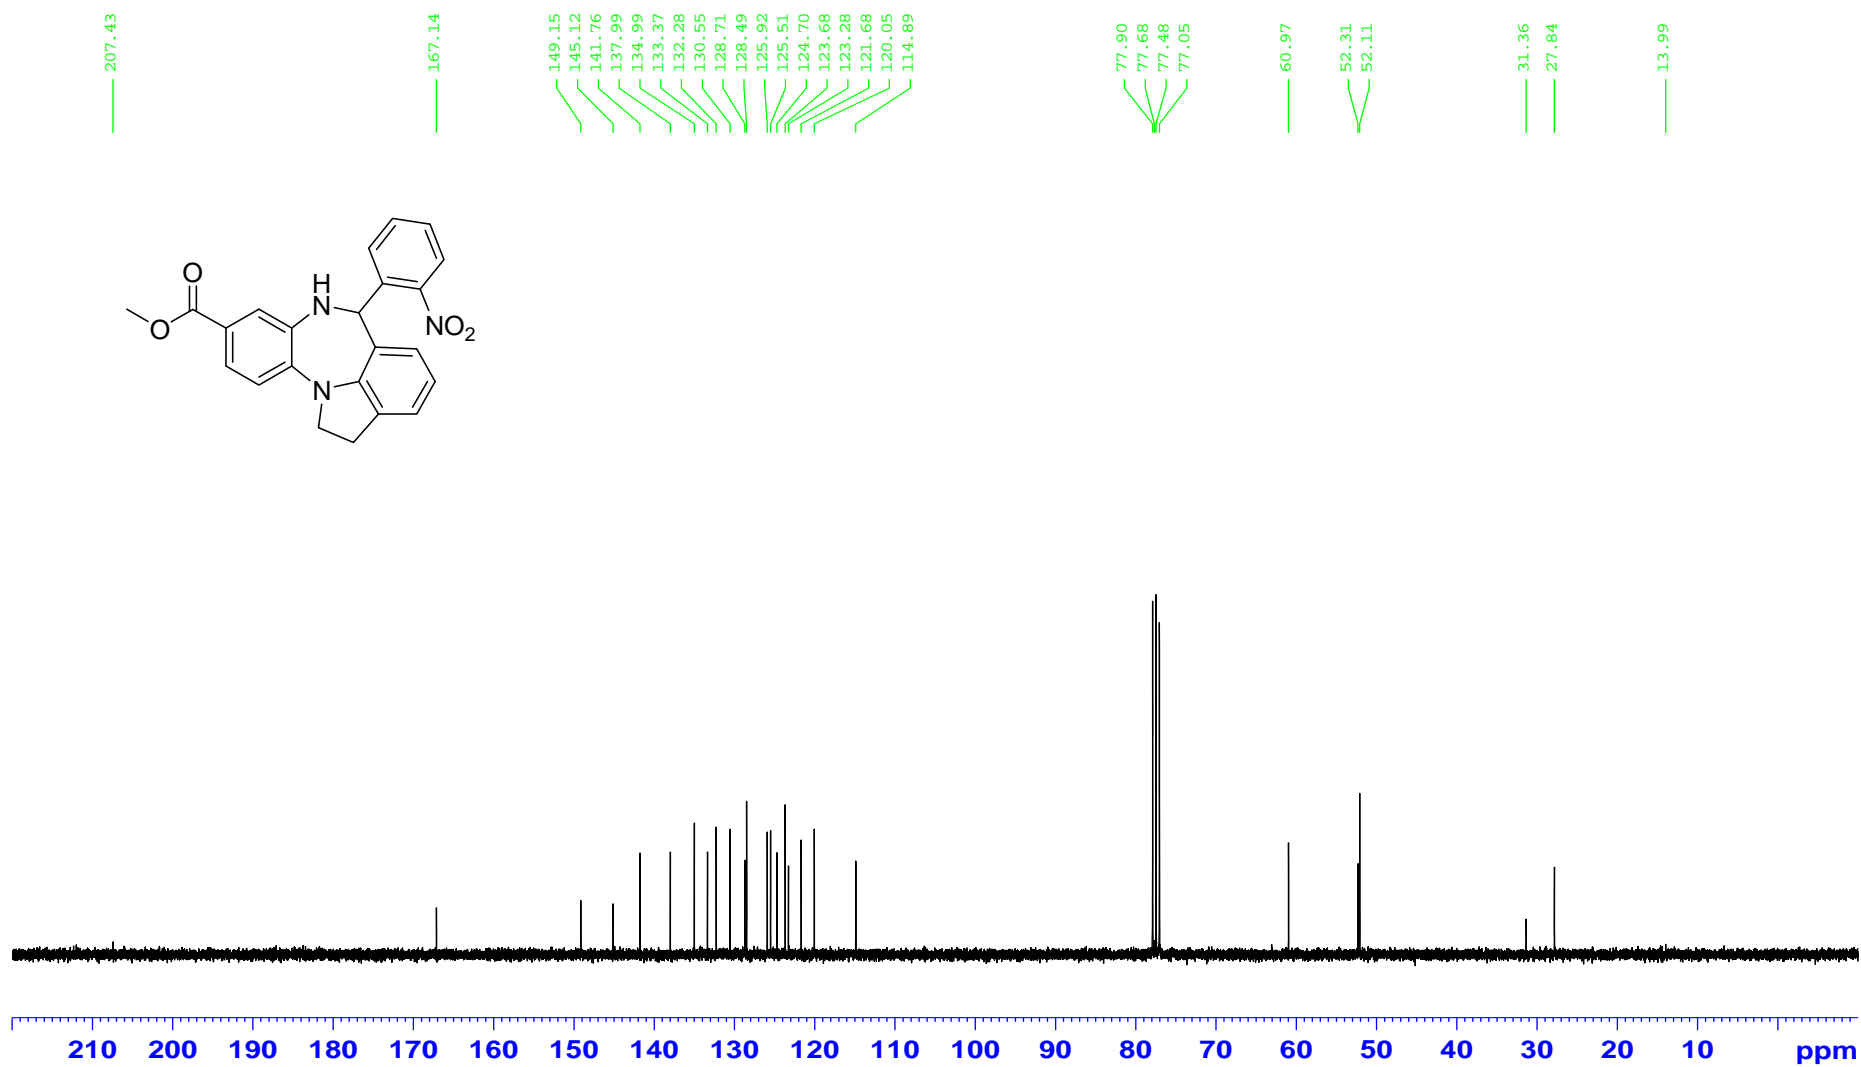

$^{13}\text{C}$  NMR Spectrum (75 MHz) of compound **4j** in  $\text{CDCl}_3$

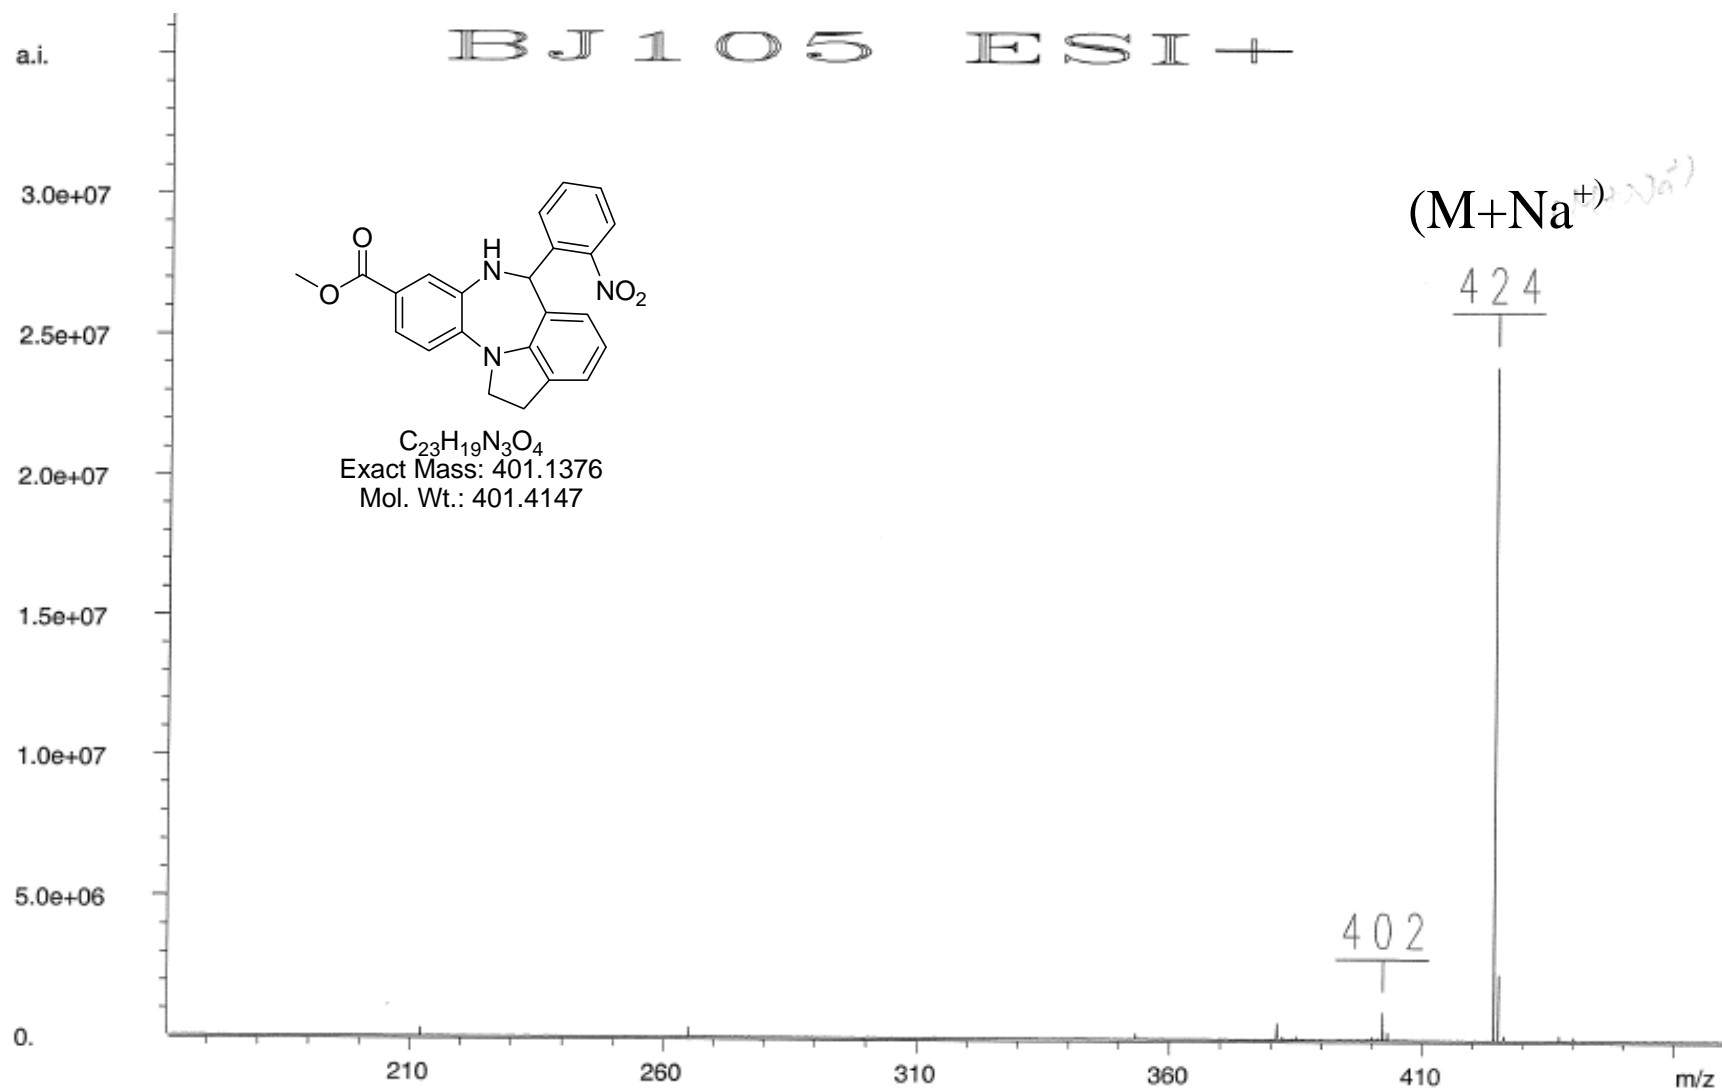

Low Resolution Mass Spectrum (LRMS) of compound **4j**

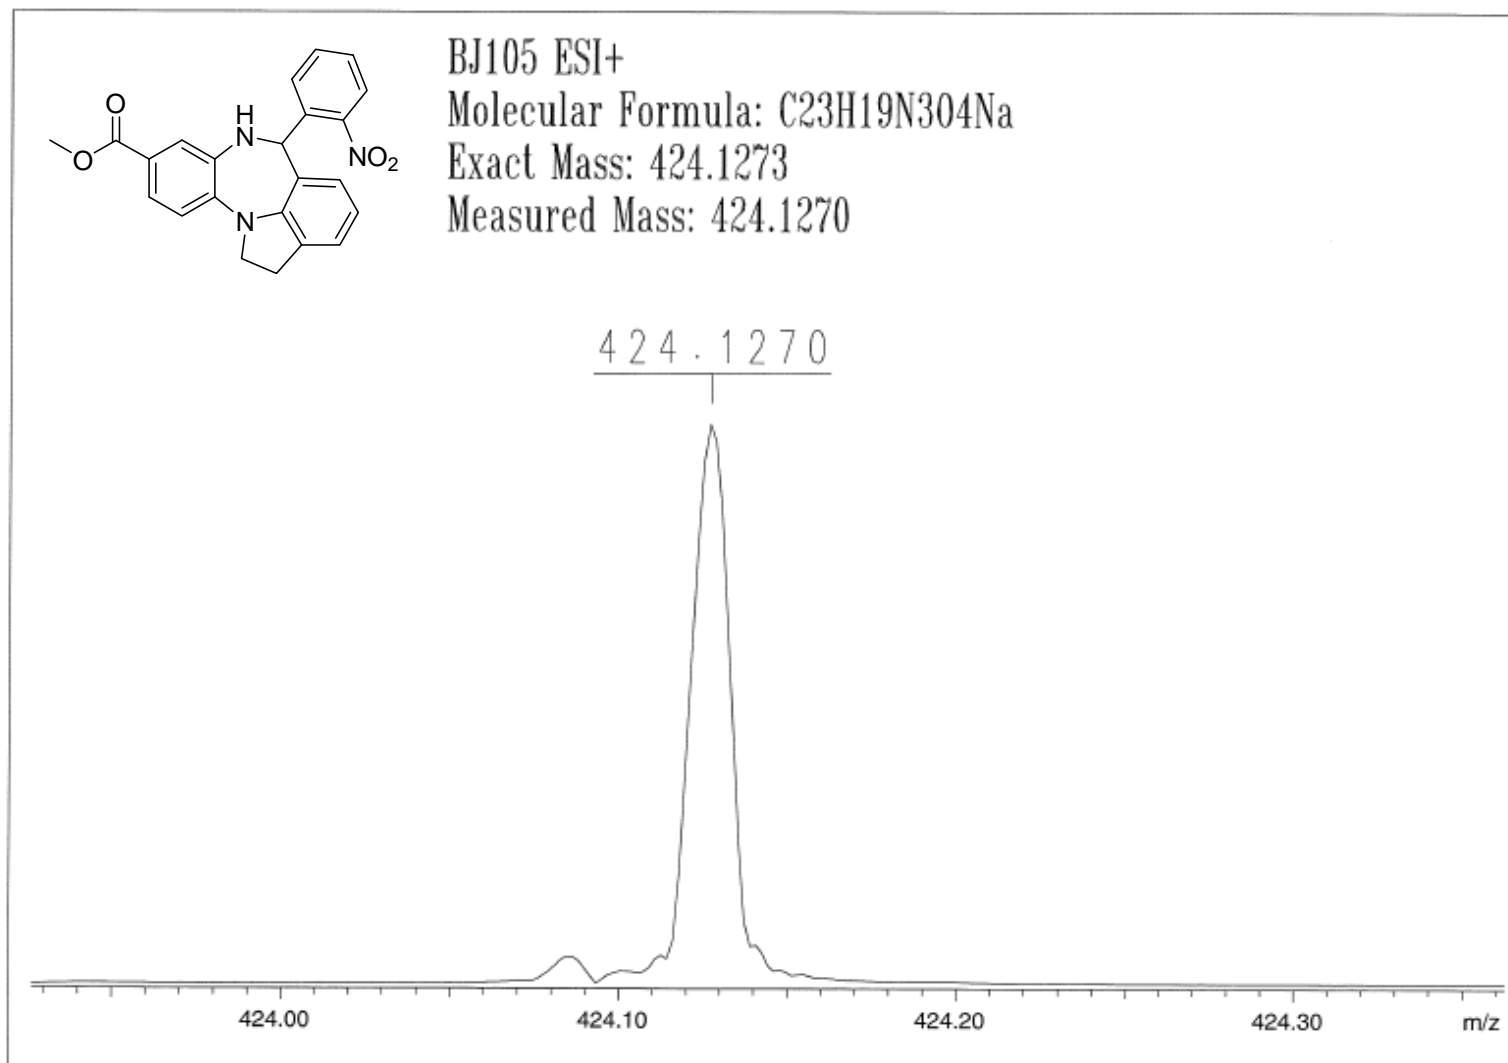

High Resolution Mass Spectrum (HRMS) of compound **4j**



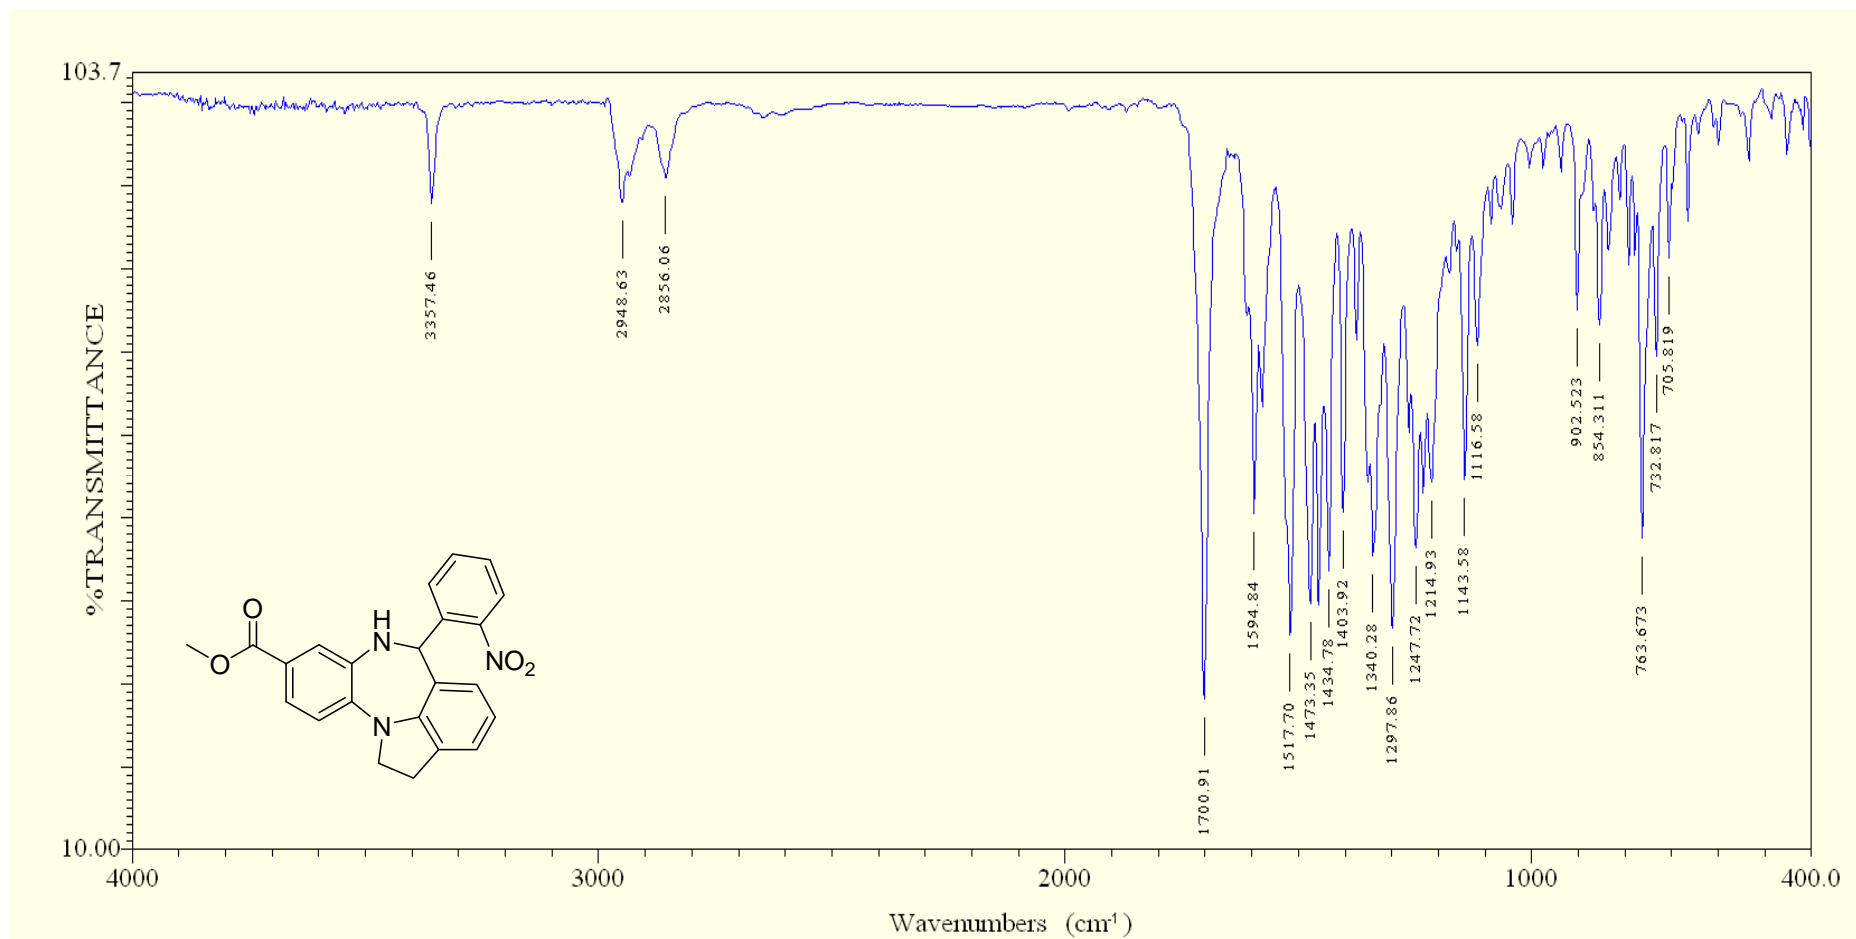

IR Spectrum of compound 4j (Neat)

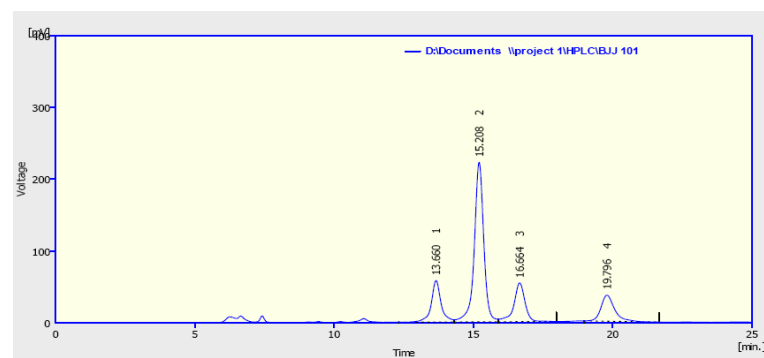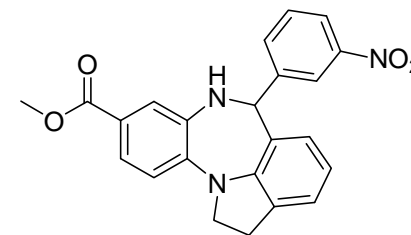

|       | Reten. Time [min] | Area [mV.s] | Height [mV] | Area [%] | Height [%] | W05 [min] |
|-------|-------------------|-------------|-------------|----------|------------|-----------|
| 1     | 13.660            | 1425.672    | 57.839      | 15.1     | 15.6       | 0.33      |
| 2     | 15.208            | 5262.915    | 222.369     | 55.8     | 60.0       | 0.34      |
| 3     | 16.664            | 1511.091    | 54.039      | 16.0     | 14.6       | 0.39      |
| 4     | 19.796            | 1231.801    | 36.365      | 13.1     | 9.8        | 0.48      |
| Total |                   | 9431.479    | 370.612     | 100.0    | 100.0      |           |

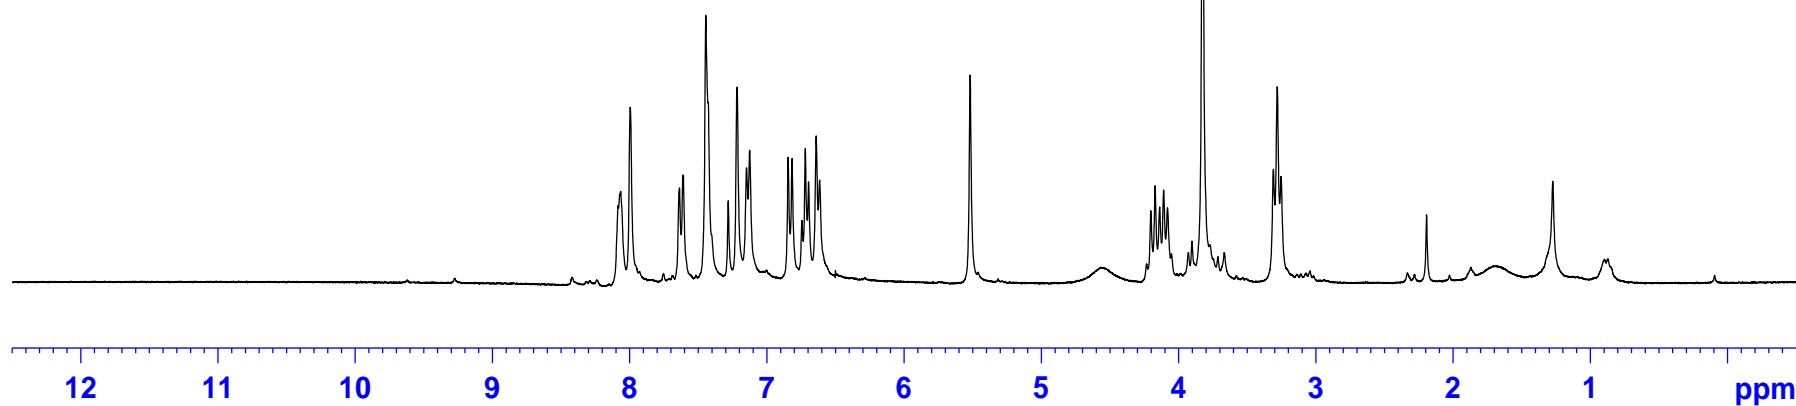

HPLC and <sup>1</sup>H NMR Spectrum (300 MHz) of compound 4k in CDCl<sub>3</sub>

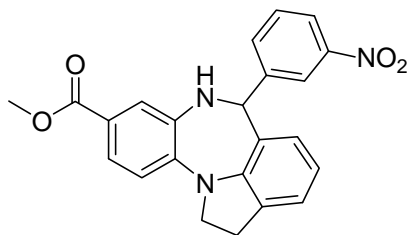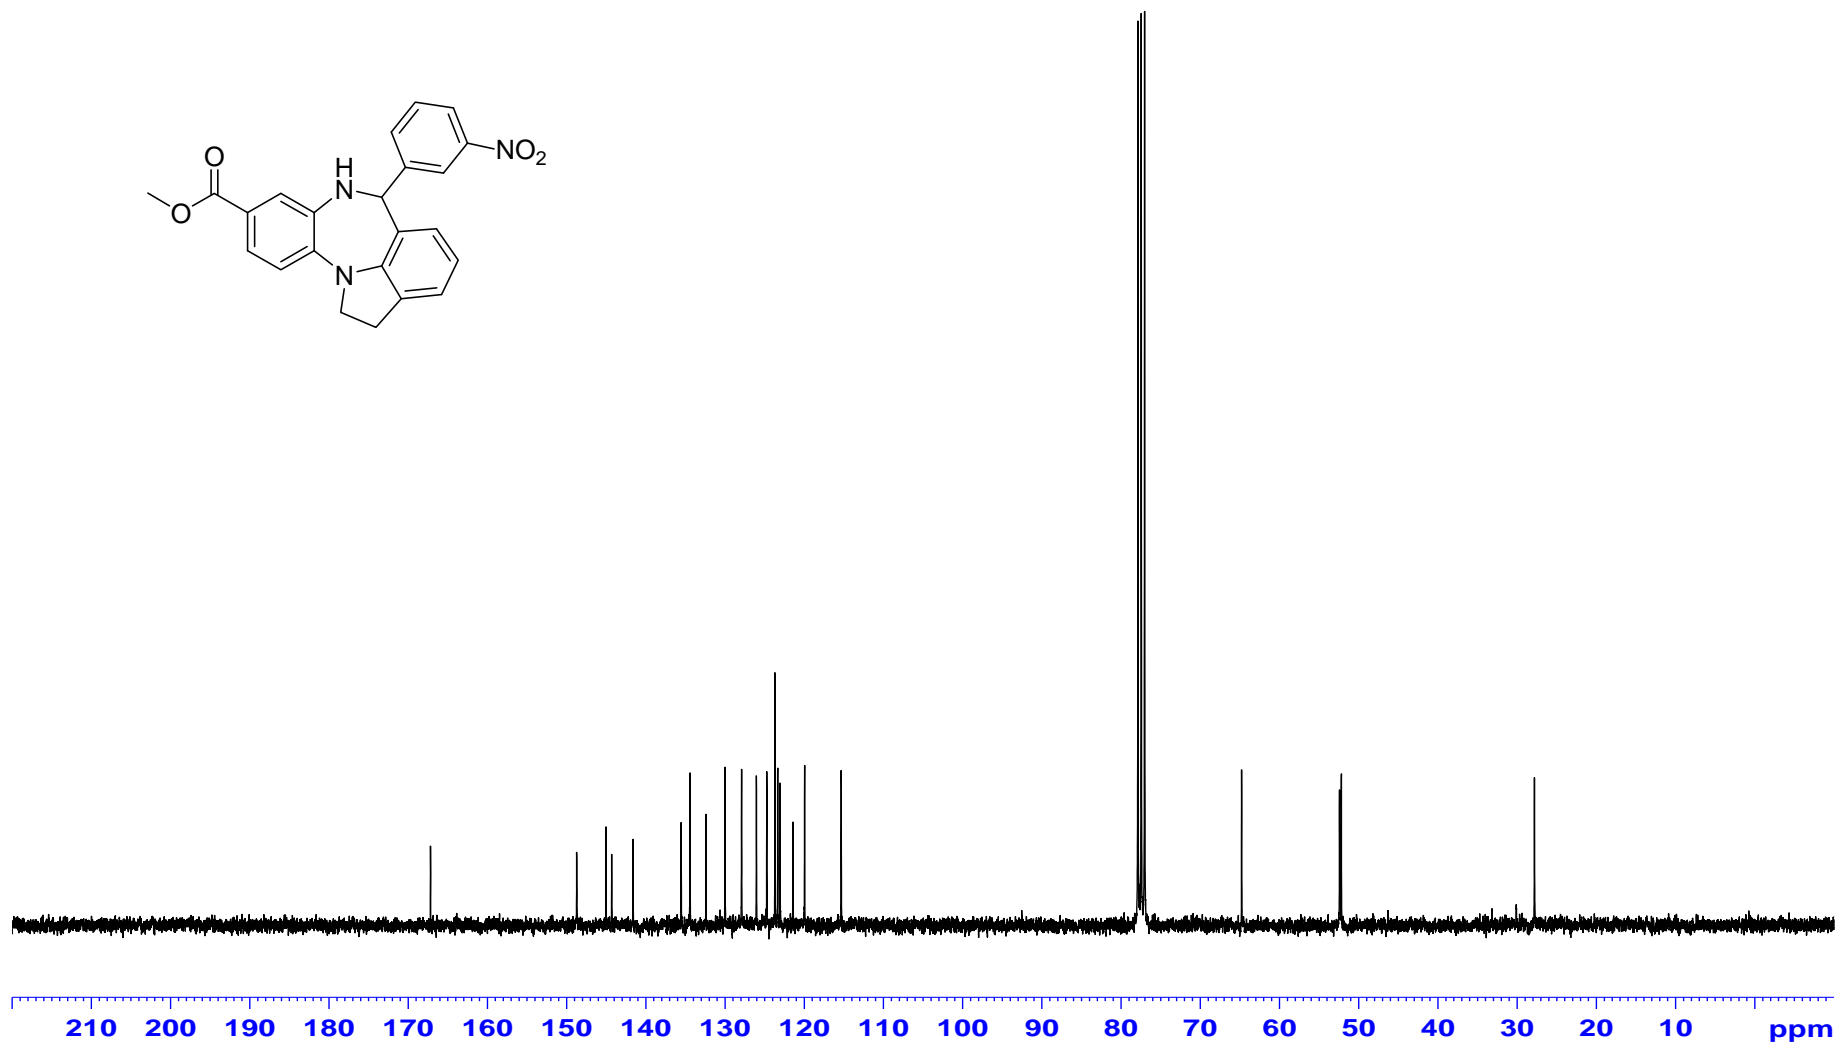

<sup>13</sup>C NMR Spectrum (75 MHz) of compound **4k** in CDCl<sub>3</sub>

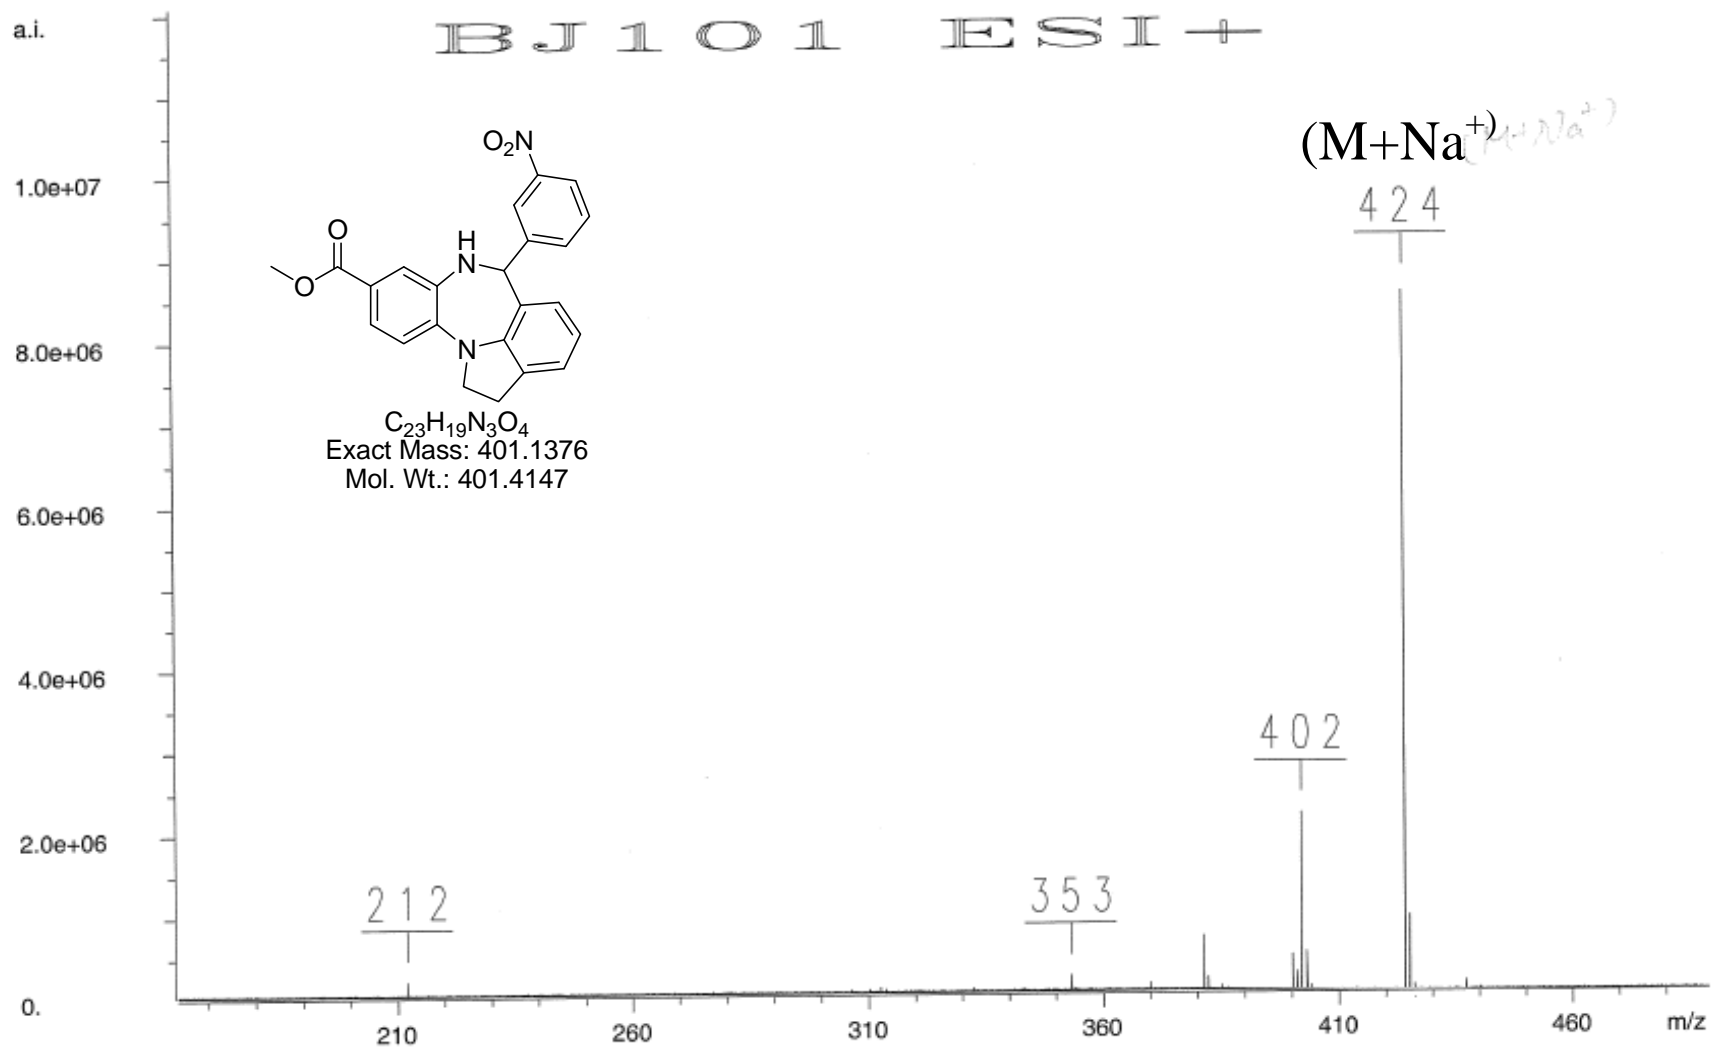

Low Resolution Mass Spectrum (LRMS) of compound **4k**

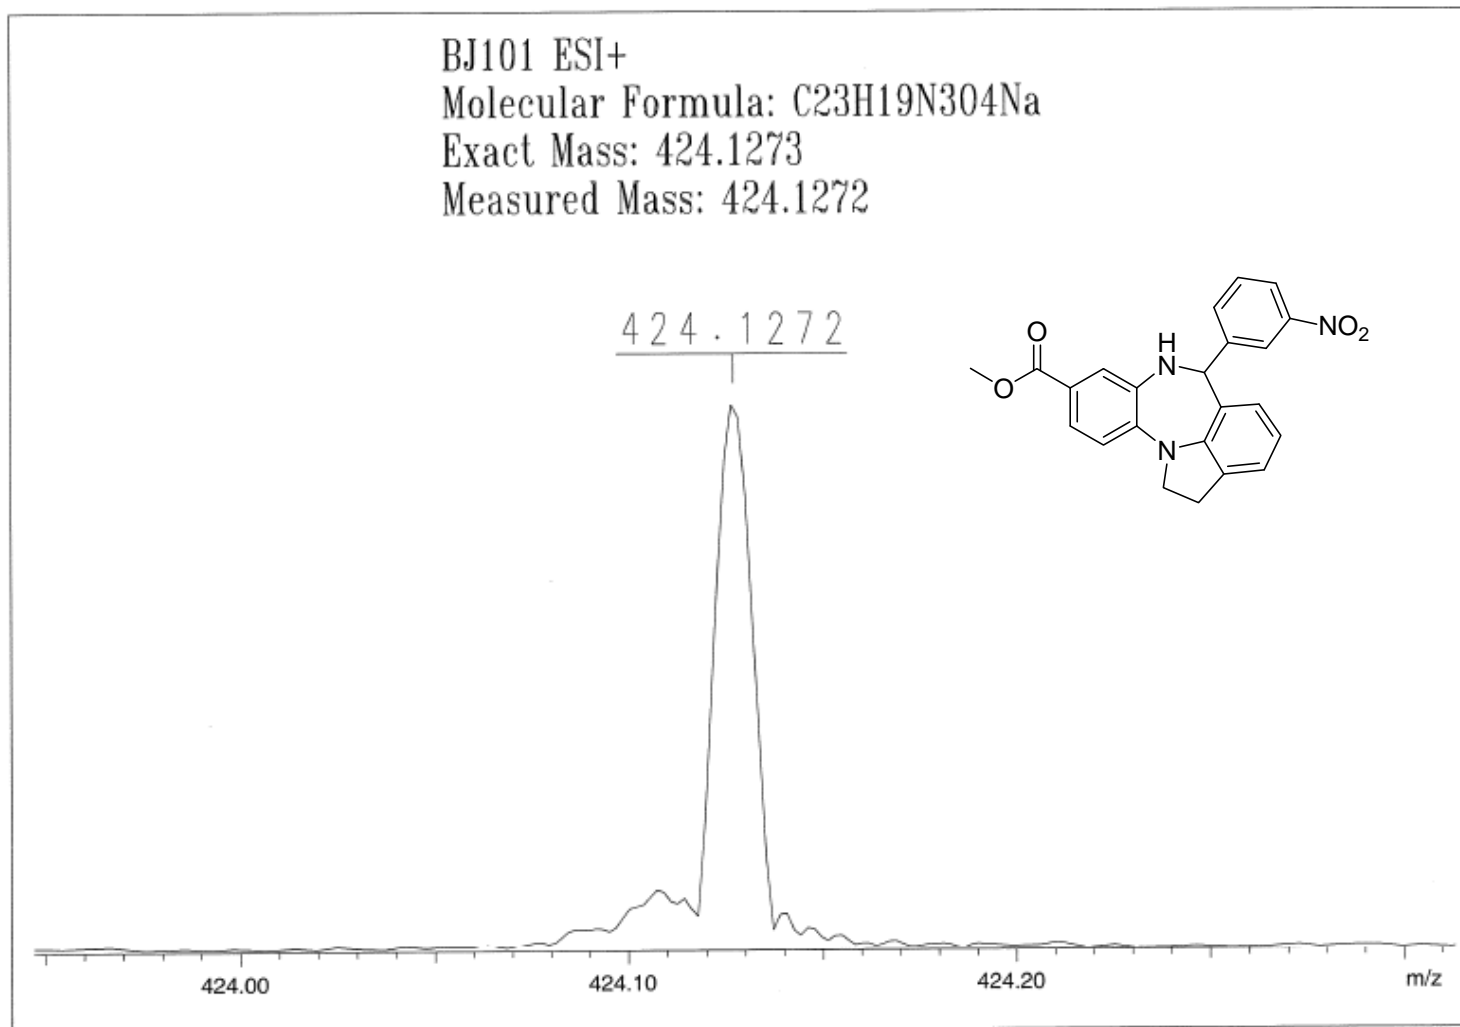

High Resolution Mass Spectrum (HRMS) of compound **4k**

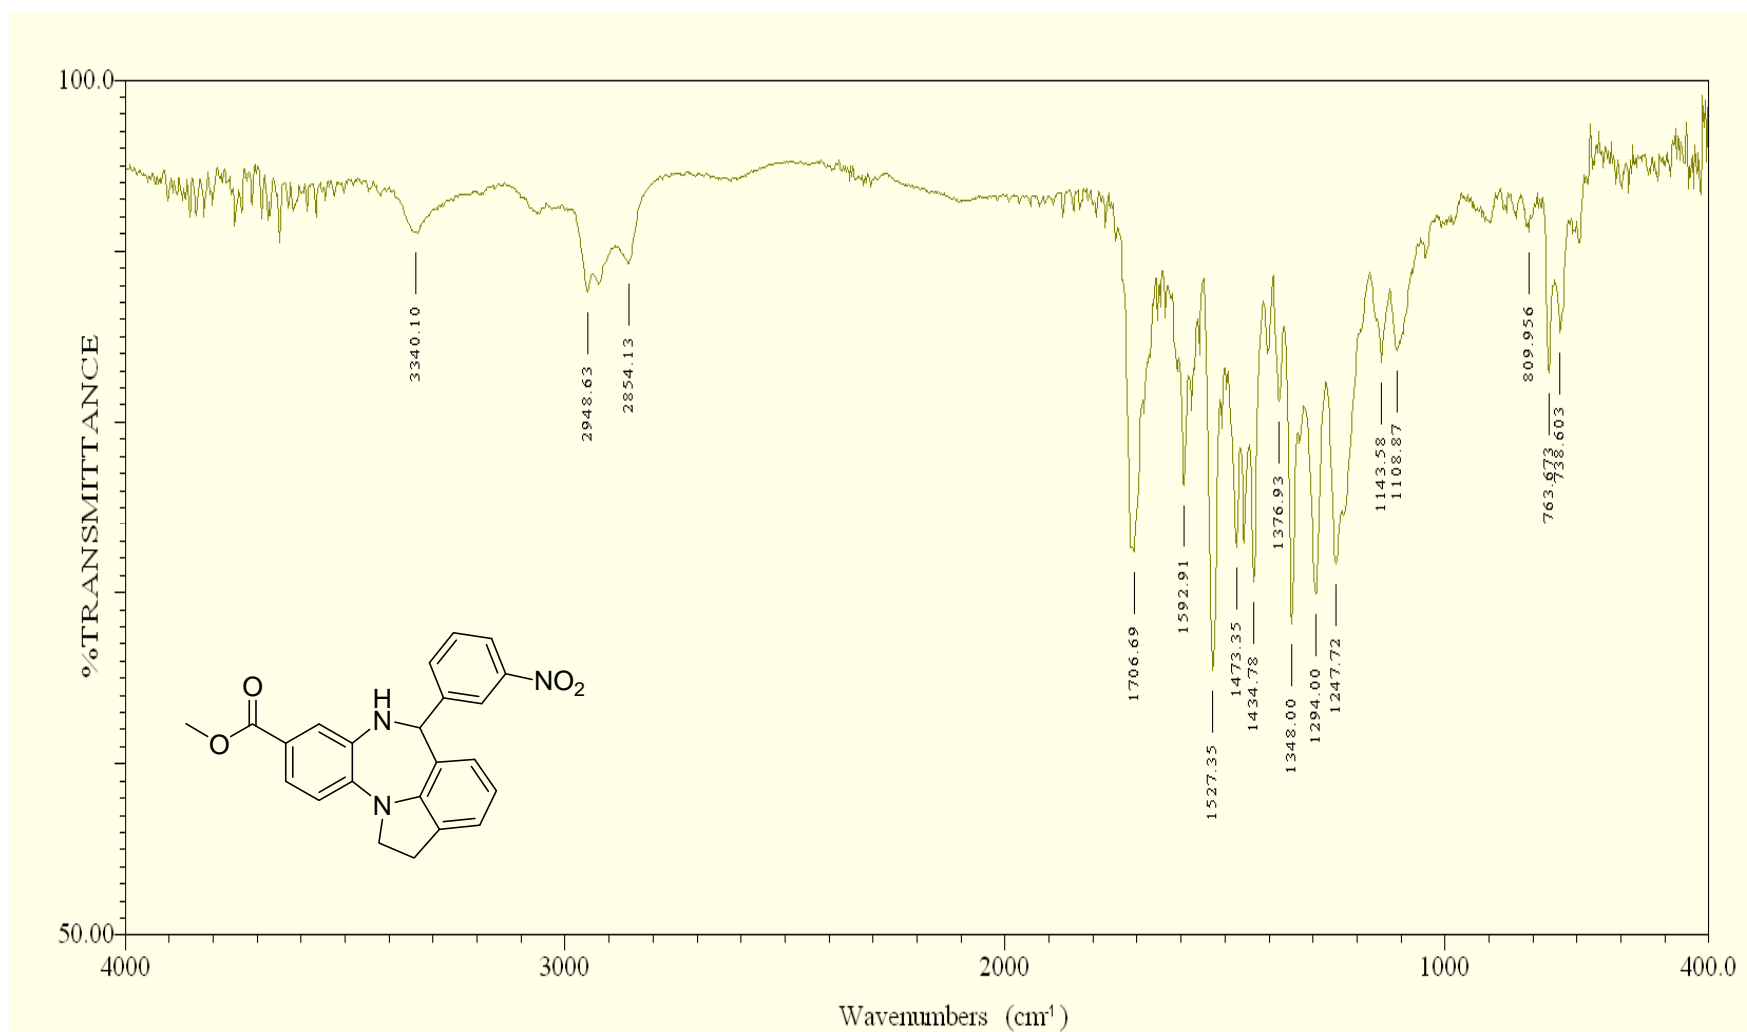

IR Spectrum of compound **4k** (Neat)

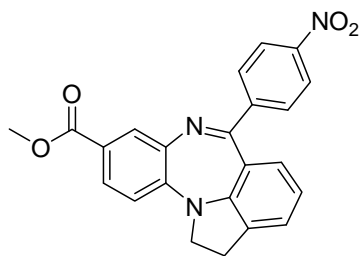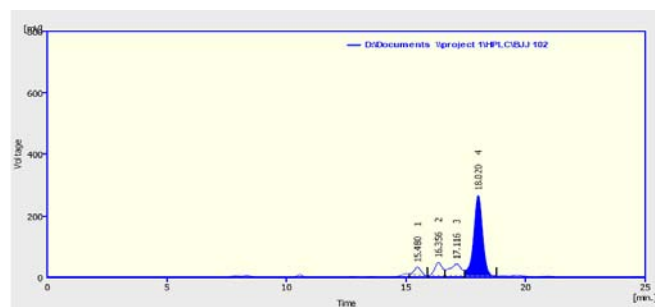

|       | Reten. Time [min] | Area [mV.s] | Height [mV] | Area [%] | Height [%] | W05 [min] |
|-------|-------------------|-------------|-------------|----------|------------|-----------|
| 1     | 15.480            | 486.677     | 25.549      | 5.1      | 6.9        | 0.30      |
| 2     | 16.356            | 958.940     | 42.938      | 10.0     | 11.6       | 0.38      |
| 3     | 17.116            | 1304.787    | 38.697      | 13.7     | 10.5       | 0.73      |
| 4     | 18.020            | 6906.411    | 262.210     | 71.2     | 71.0       | 0.39      |
| Total |                   | 9556.815    | 369.394     | 100.0    | 100.0      |           |

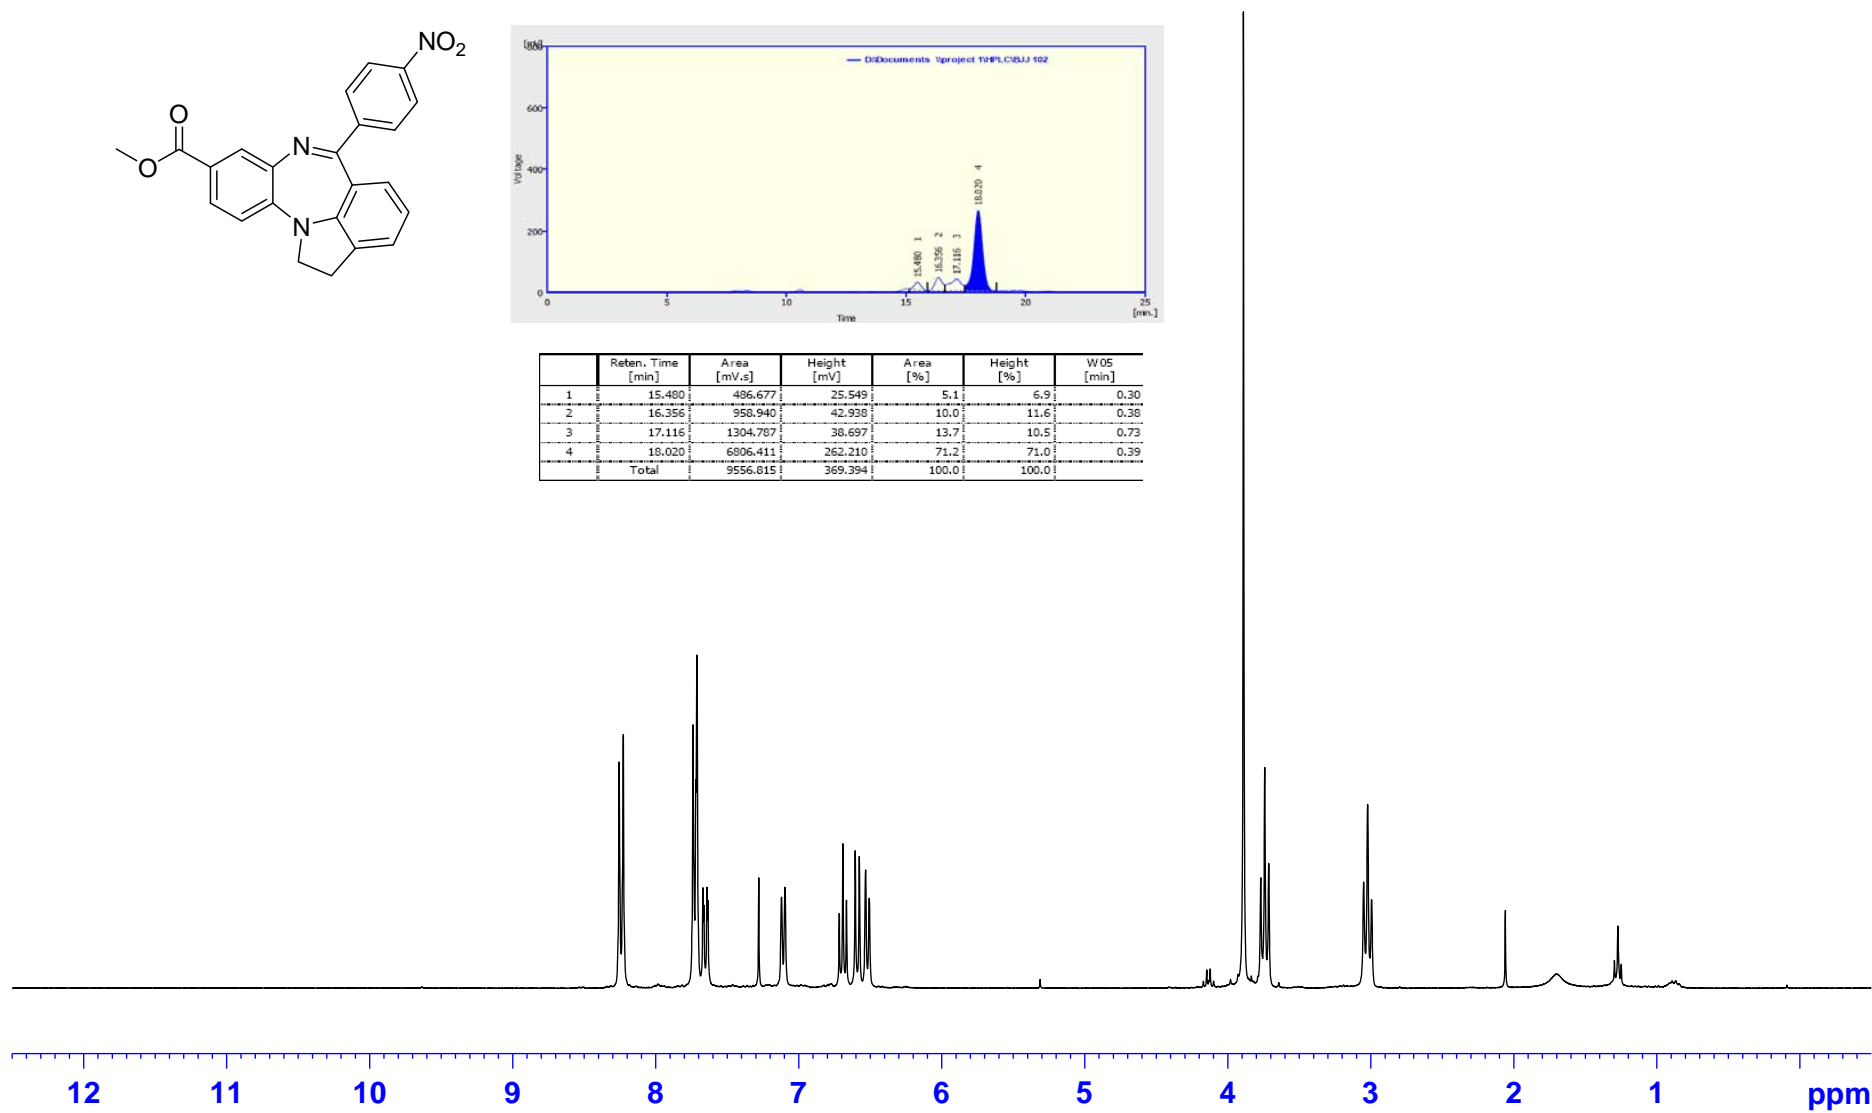

HPLC and <sup>1</sup>H NMR Spectrum (300 MHz) of compound 5 in CDCl<sub>3</sub>

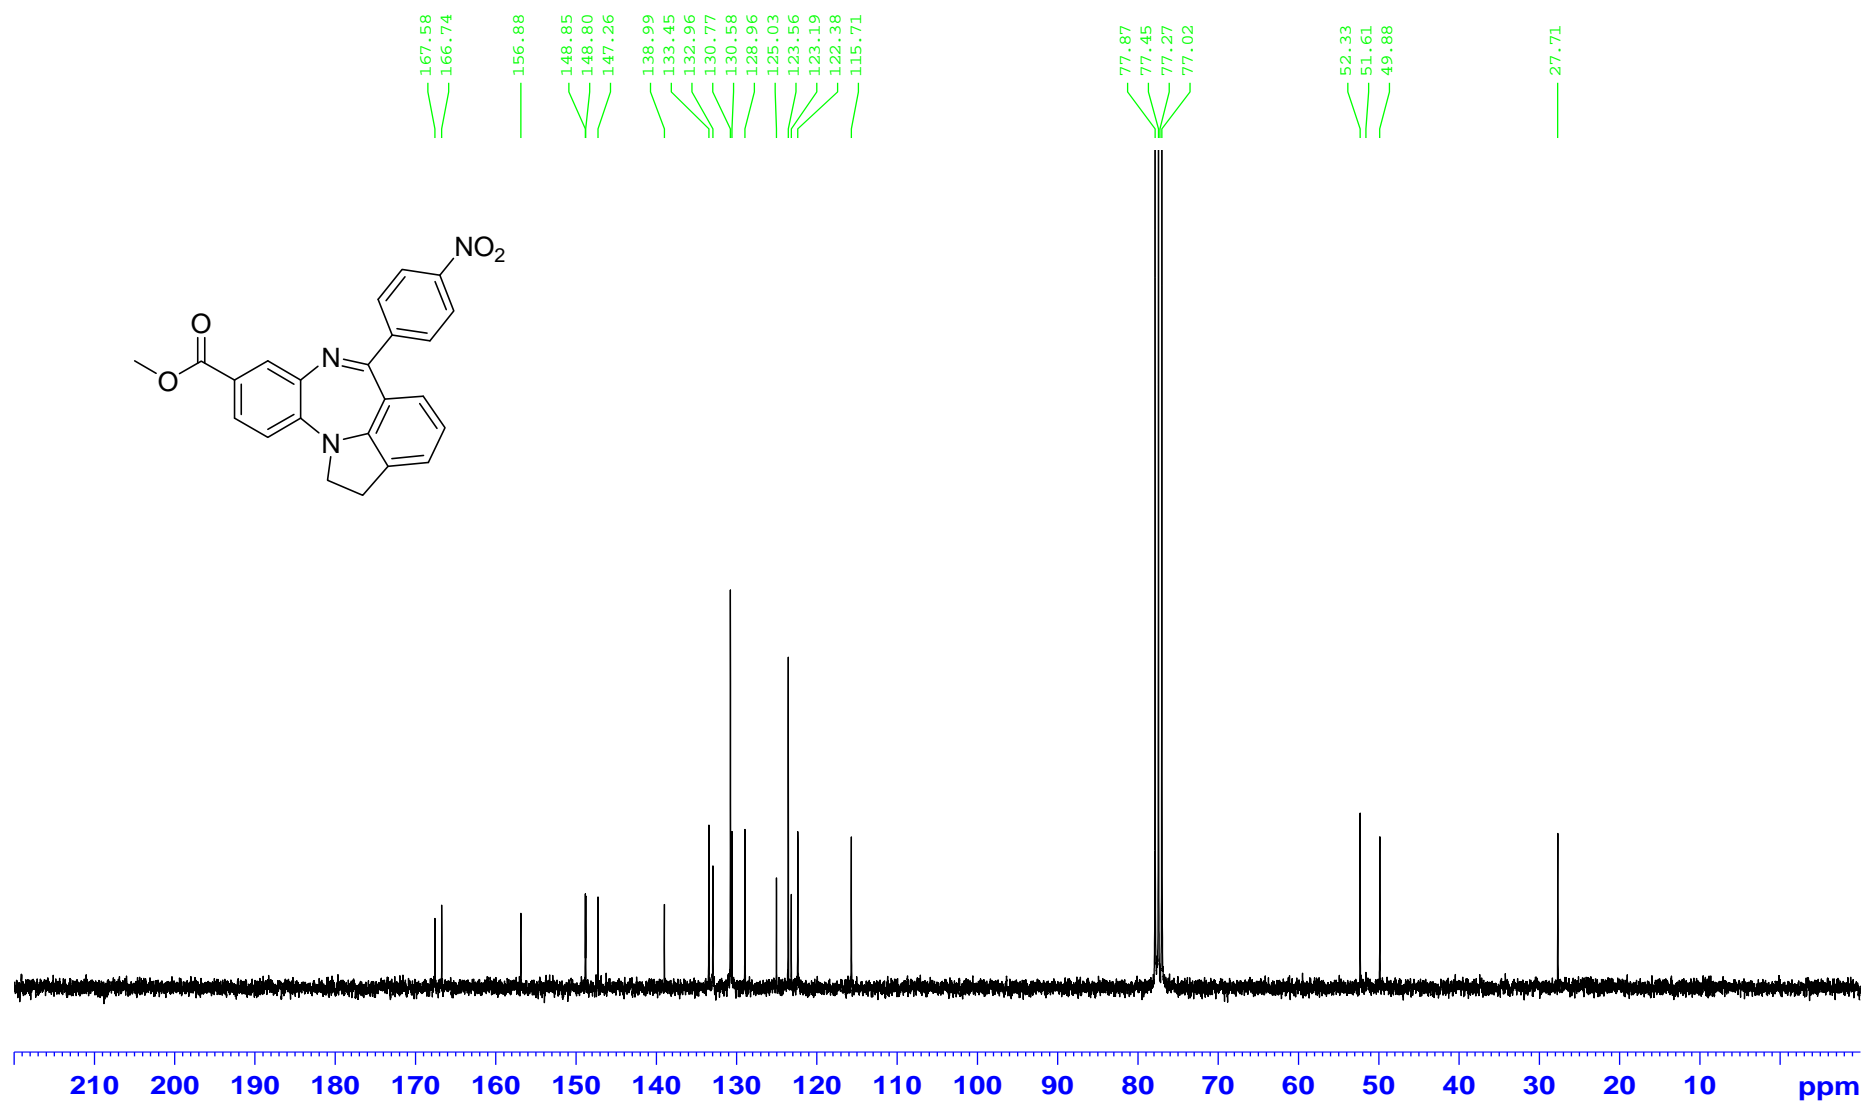

<sup>13</sup>C NMR Spectrum (75 MHz) of compound 5 in CDCl<sub>3</sub>



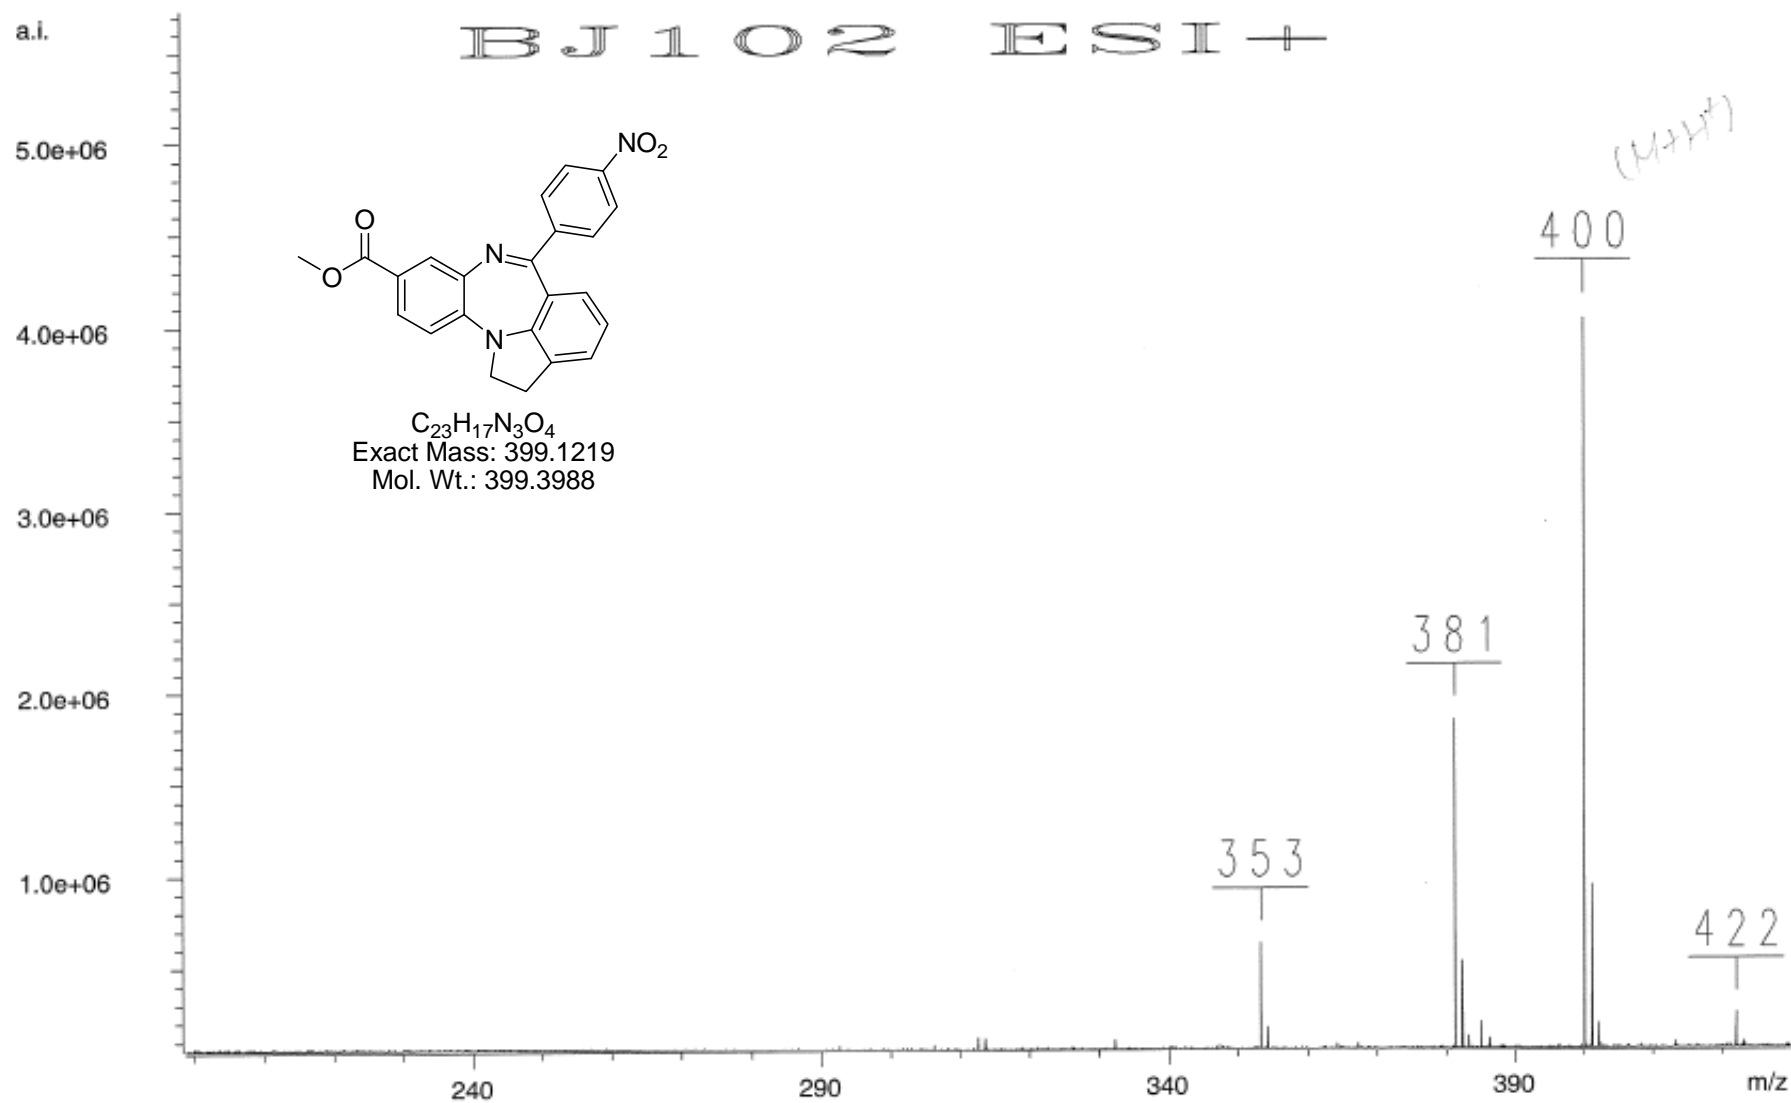

Low Resolution Mass Spectrum (LRMS) of compound 5

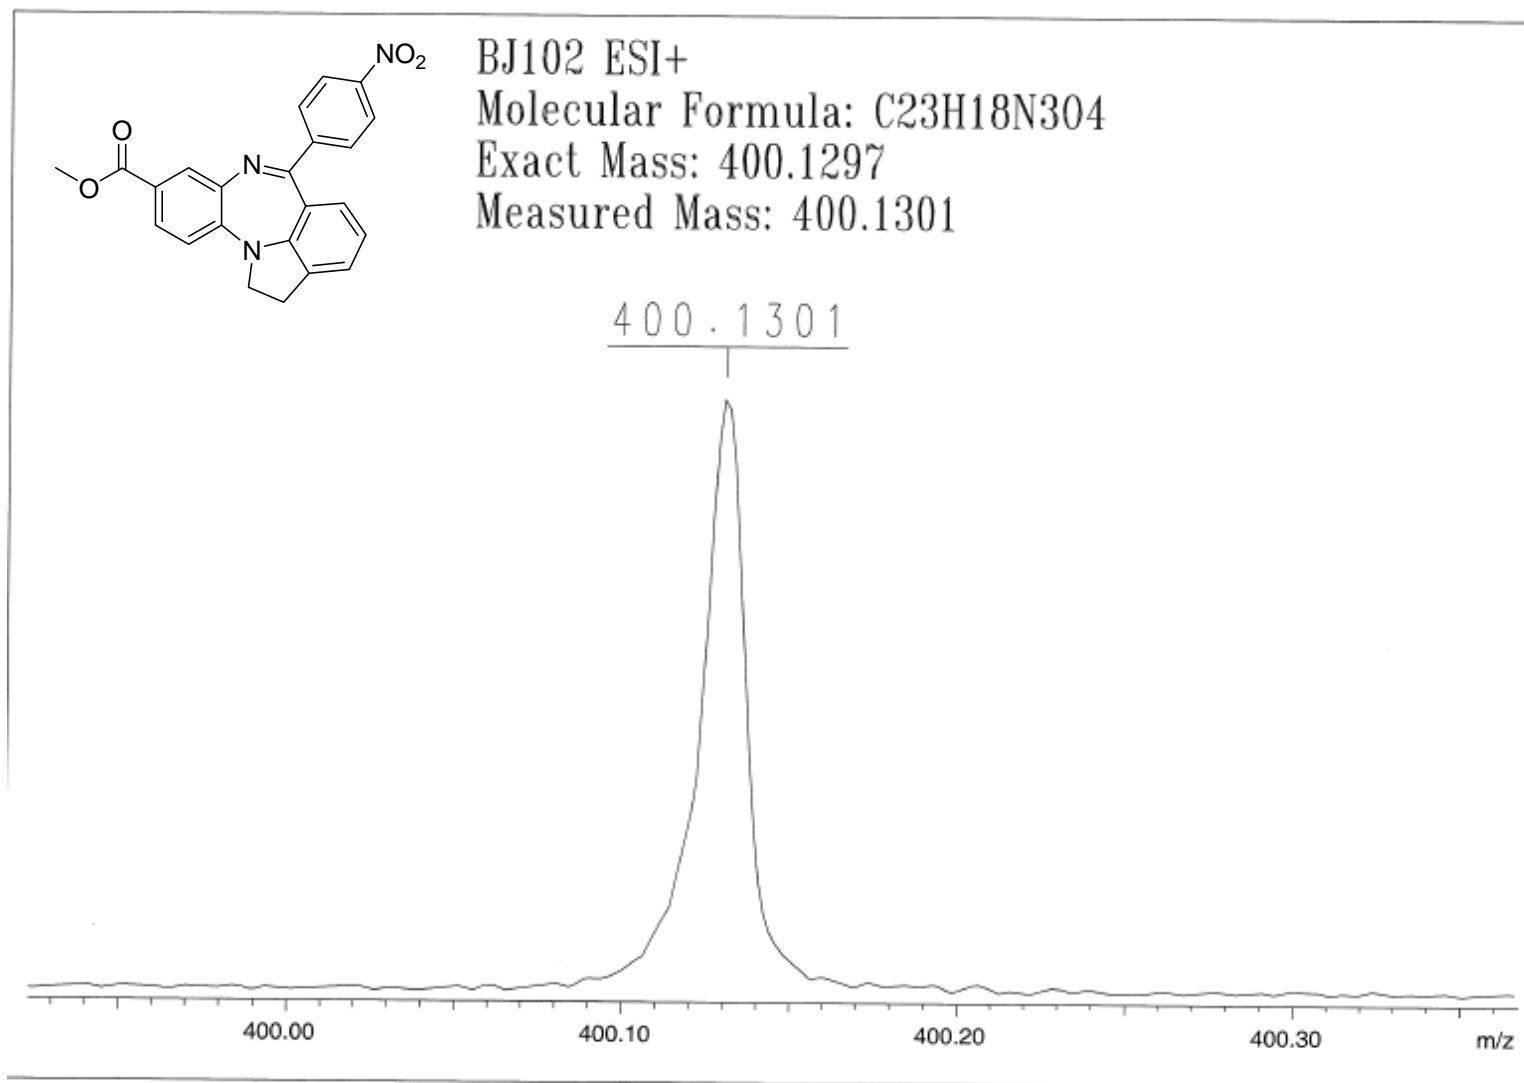

High Resolution Mass Spectrum (HRMS) of compound **5**

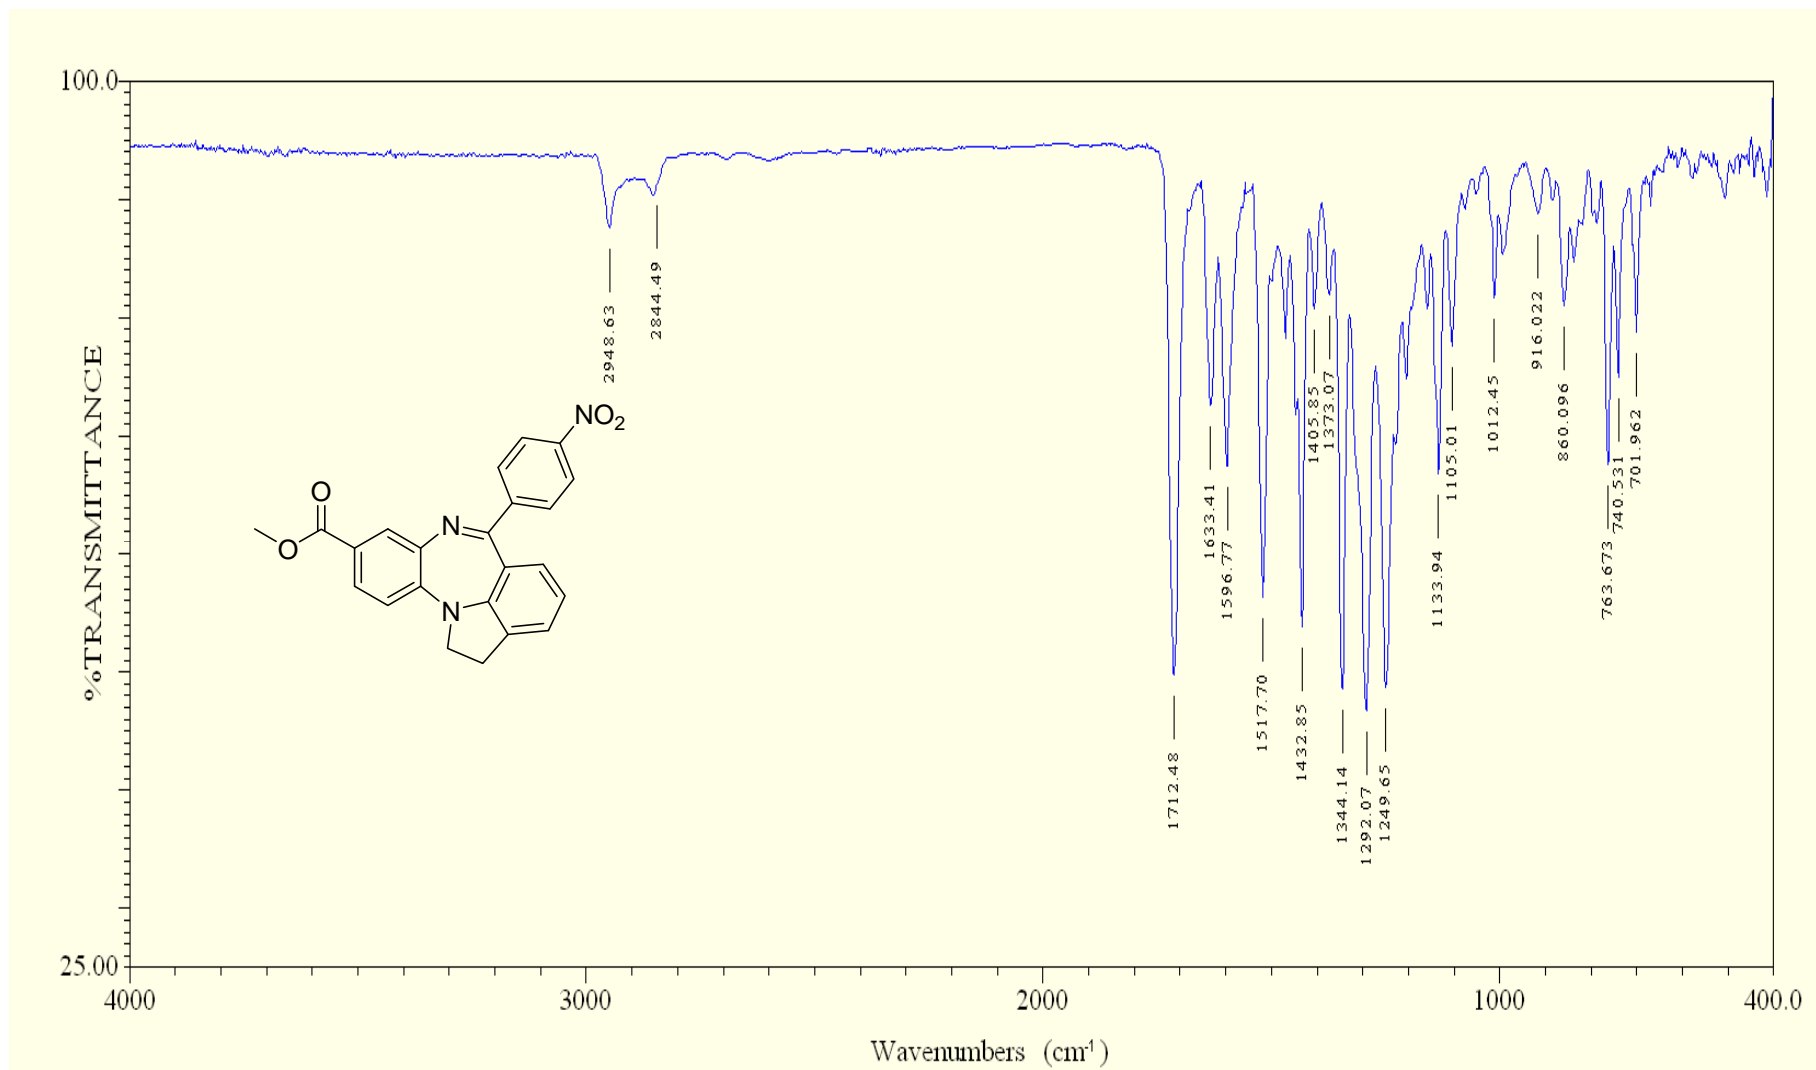

IR Spectrum of compound 5 (Neat)
